# Supplementary material for: Streamlined construction of peptide macrocycles via palladium-catalyzed intramolecular S-arylation in solution and on DNA
Source: PubMed Central journal article supplement — Chem Sci. 2021 Mar 11;12(16):5804–10. doi: 10.1039/d1sc00789k (PMC8179660; doi:10.1039/d1sc00789k), 2021-03-11

# Supporting Information

## Streamlined Construction of Peptide Macrocycles via Palladium-catalyzed Intramolecular S-Arylation in Solution and on DNA

Peng Yang,<sup>a#</sup> Xuan Wang,<sup>b#</sup> Bo Li,<sup>a#</sup> Yixuan Yang<sup>b</sup>, Jingfeng Yue<sup>b</sup>, Yanrui Suo<sup>b</sup>, Huarong Tong,<sup>a</sup> Gang He,<sup>a</sup> Xiaojie Lu,<sup>\*b</sup> and Gong Chen<sup>\*a</sup>

<sup>a</sup>State Key Laboratory and Institute of Elemento-Organic Chemistry, College of Chemistry, Nankai University, Tianjin 300071, China

<sup>b</sup>State Key Laboratory of Drug Research, Shanghai Institute of Materia Medica, Chinese Academy of Sciences, 501 Haike Road, Zhang Jiang Hi-Tech Park, Pudong, Shanghai 201203, China

|                                                                           |            |
|---------------------------------------------------------------------------|------------|
| <b>1. Reagents &amp; Instruments</b> .....                                | <b>2</b>   |
| <b>2. Preparation of Linear Peptides</b> .....                            | <b>3</b>   |
| <b>3. Optimization of Intramolecular S-Arylation</b> .....                | <b>6</b>   |
| <b>4. General procedure for Pd-catalyzed peptide macrocyclization</b> ... | <b>9</b>   |
| <b>5. The structure of Headpiece and AOP-headpiece</b> .....              | <b>67</b>  |
| <b>6. DNA-compatible reaction general protocols</b> .....                 | <b>67</b>  |
| <b>7. Synthetic routes and mass spectrums</b> .....                       | <b>69</b>  |
| <b>8. The construction of DNA-encoded library</b> .....                   | <b>81</b>  |
| <b>9. Library synthetic route</b> .....                                   | <b>82</b>  |
| <b>10. The synthesis of DNA-encoded library</b> .....                     | <b>82</b>  |
| <b>11. Affinity selection</b> .....                                       | <b>101</b> |
| <b>12. Enrichment Calculation</b> .....                                   | <b>101</b> |
| <b>13. Radioactive acetyltransferase activity assay</b> .....             | <b>101</b> |
| <b>14. Supplementary note</b> .....                                       | <b>103</b> |
| <b>15. Reference</b> .....                                                | <b>104</b> |
| <b>16. NMR spectra</b> .....                                              | <b>104</b> |

## 1. Reagents & Instruments

Unless otherwise noted, chemicals were purchased from Sigma Aldrich, J&K Chemical, or Energy Chemical and were used without further purification. Protected Fmoc-amino acids and coupling reagents were purchased from Bidepharm and Shanghai Haohong Scientific Co. TLC were performed on silica gel Huanghai HSGF254 plates and visualization of the developed chromatogram was performed by fluorescence quenching of UV fluorescence ( $\lambda_{\text{max}} = 254 \text{ nm}$ ). Flash chromatography was performed using Silica gel (200-300 mesh) purchased from Qingdao Haiyang Chemical. Rink-AM amide resin (0.667 mmol/g) and 2-Cl-Trt resin (0.99 mmol/g) were purchased from Tianjin Nankai HECHENG. Pd-G<sub>3</sub>-XantPhos (98%, Ark Pharm.) was used in the Pd-catalyzed intramolecular S-arylation.

NMR spectra were recorded on Bruker AVANCE AV 400 instruments. UPLC-MS analyses were performed with a Dionex UltiMate 3000 connected to a thermo scientific MSQ PLUS mass spectrometer using Thermo Scientific Hypersil GOLD C18 (1.9  $\mu\text{m}$ , 2.1  $\times$  100 mm) or Acclaim RSLC 120 C18 (2.2  $\mu\text{m}$ , 2.1  $\times$  100 mm) UPLC analytical column. Linear gradients using A: H<sub>2</sub>O (0.1% HCOOH) and B: MeCN (0.1% HCOOH) were run over varying periods of time. High-resolution mass spectra (HRMS) were recorded on a Thermo Q Exactive Focus using ESI. Heating reactions were performed by heating blocks which purchased from Boost Tech. Co., Ltd., Ltd. Semi preparative HPLC was carried out on a Dionex UltiMate 3000 using a Thermo Scientific Hypersil GOLD C18 (5  $\mu\text{m}$ , 21.2  $\times$  150 mm) preparative column. Linear gradients using A: H<sub>2</sub>O (0.1% HCOOH or TFA) and B: MeCN (0.1% HCOOH or TFA) were run over varying periods of time. Peptide centrifugation was performed by DM0412 low speed centrifuge purchased from DLAB Scientific Co., Ltd. Peptide freeze drying was achieved by means of VirTis/SP SCIENTIFIC BenchTop Pro.

Analysis on DNA was performed by HPLC/ESI-MS. After reaction, an aliquot of the reaction mixture solution was diluted (typically a 1  $\mu\text{L}$  aliquot diluted with 40  $\mu\text{L}$  of water) for LC/MS. Reverse-phase chromatography column (Optimize Opti-Lynx Trap 20  $\mu\text{L}$ , C18AQ-40u) was applied. The sample was eluted [Inject at 4%B, step 90%B at

0.1 min., 1 mL/min flow rate; Solvent A: 0.75%v/v hexafluoroisopropanol (HFIP)/0.038% v/v triethylamine /5  $\mu$ M EDTA in deionized water; Solvent B: 0.75% v/v HFIP/ 0.038% triethylamine /5  $\mu$ M EDTA in 90/ 10 methanol/ deionized water] with detection at UV 260 nm.

## 2. Preparation of linear peptide

All the linear peptides obtained in this work were synthesized following the reported SPPS procedures<sup>[1]</sup>.

Peptide 1 is taken as an example to give the detailed operation:

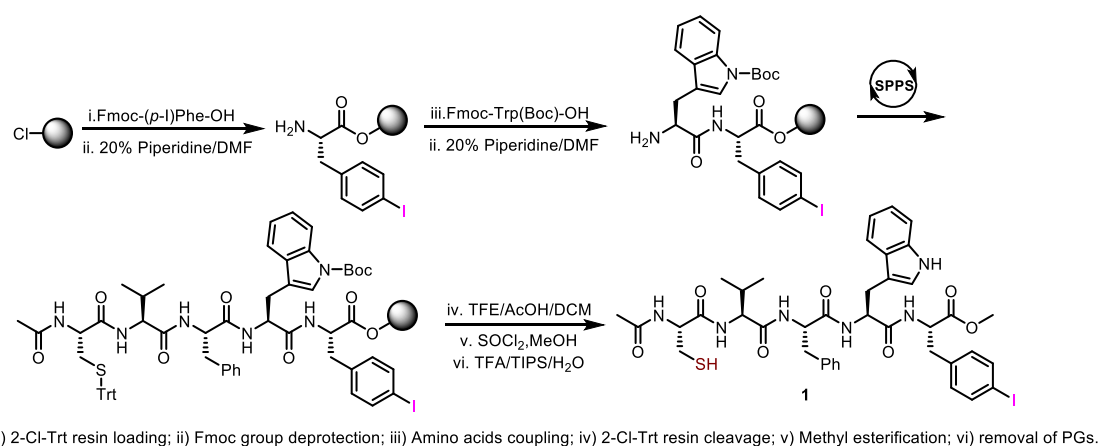

### Scheme S1. Synthesis of linear peptide 1

#### Preparation of linear peptides 1 from 2-Cl-Trt resin:

2-Chlorotrityl chloride resin (1 g, 0.99 mmol, 1.0 equiv) was swelled in 1% DI-PEA/DCM for 10 min before added into a 25 mL peptide synthesis tube. After sucking the solvent under vacuum, a solution of the Fmoc-(*p*-I)Phe-OH (620 mg, 1.2 mmol, 1.2 equiv) and DIPEA (1.1 mL, 6.0 mmol, 6.0 equiv) in DCM (20 mL) was added. The tube was capped and shaken for 1 h at room temperature, then DIPEA (0.53 mL, 3.0 mmol, 3.0 equiv) and MeOH (1 mL) were added. The mixture shaken for another 20 minutes. The tube was then drained, rinsed with CH<sub>2</sub>Cl<sub>2</sub> (15 mL). The resin was treated with 20% piperidine/DMF (15 mL) for 10 minutes followed by thorough washing with DMF (10 mL) and DCM (10 mL), which was performed twice. A solution of Fmoc-Trp (Boc)-OH (1.58 g, 3.0 mmol, 3.0 equiv) and Oxyma (0.43 g, 1.8 mmol, 3 equiv) in NMP (15 mL) followed by DIC (0.51 mL, 3.3 mmol, 3.3 equiv) were added to the resin and the mixture was shaken for 1 h at room temperature. The resin was then drained

and rinsed with DMF (2 x 10 mL) and DCM (2 x 10mL). Repeating the coupling and deprotection steps, peptide chain can be elongated with Phe, Val and Cys successively. After the completion of peptide elongation, the resin was treated with a solution of TFE/AcOH/DCM (20 mL, 1/1/3, v/v/v) twice for 1 h each time. The combined solvent was concentrated *in vacuo* to give the peptide with a free carboxylic acid group which was treated with the SOCl<sub>2</sub> (0.37 mL, 5.0 mmol, 5.0 equiv) in MeOH (25 mL) at 0 °C. The solution was gradually warmed to room temperature and stirred for 3 hours. After removing the solvent under vacuum, and the mixture was added the cocktails of TFA/H<sub>2</sub>O/TIPS (95:2.5:2.5) for 1 hours. Then the solvents were evaporated at 30 °C and the crude peptide was precipitated by the addition of cold diethyl ether. After centrifugation the supernatant was taken out to give the crude peptide which was dried under vacuum. Finally got 786 mg white solid in 90% yield. All of the products were pure enough for next cyclization step. For peptides that are not methylated at the C-terminus, Mmt protected Cys can be used. Mmt can be removed using DCM/TES/TFA (95:3:2).

#### **Preparation of linear peptides from Rink-amide AM resin:**

Rink-amide AM resin (1.0 equiv) was swelled in DCM for 10 min and then was added into a peptide synthesis tube. After sucking the solvent under vacuum, a solution of 20% piperidine in DMF was added and the tube was capped and shaken for 25 min (15 min + 10min). The tube was then drained, rinsed with DCM (2 x 10 mL) and DMF (2 x 10 mL). DIC (3.3 equiv) was added to a freshly prepared solution of the first loading Fmoc amino acid (3.0 equiv) and Oxyma (3.0 equiv) in NMP (15 mL) and the solution was stirred under ice-water bath for 5 minutes. Then the clear solution was added to the tube and shaken for 2 h at room temperature. The tube was then drained, the resin was rinsed with DMF (2 x 10 mL), DCM (2 x 10 mL). The amount of amino acid loaded on the resin was then measured by Fmoc determination.

The dry Rink-AM amide resin was treated with a solution of TFA/H<sub>2</sub>O/TIPS (95:2.5:2.5) for 2 hours. The solvents were concentrated *in vacuo* at 30 °C and the crude peptide was precipitated by the addition of cold diethyl ether. After centrifugation (5 min, 4000 r/min, 25°C) the supernatant was removed to give the crude peptide which was dried



under vacuum. All of the products were used for next step without any purification.

### Coupling amino acids in solution:

To a solution of the crude peptide (1.0 equiv) prepared from 2-Cl-Trt resin, HOAt (1.0 equiv) and HATU (1.0 equiv) in DMF, the corresponding amino acid derivative (1.1 equiv) and DIPEA (1.1 equiv) were added at 0 °C. Then the reaction mixture was gradually warmed to room temperature and stirred for 6 h. The reaction was quenched with 1 N HCl and extracted with EtOAc. The combined organic phase was sequentially washed with saturated NaHCO<sub>3</sub> and brine, dried over anhydrous Na<sub>2</sub>SO<sub>4</sub>. The organic phase was concentrated in vacuo, the resulting residue was purified by silica gel flash chromatography to give the desired product.

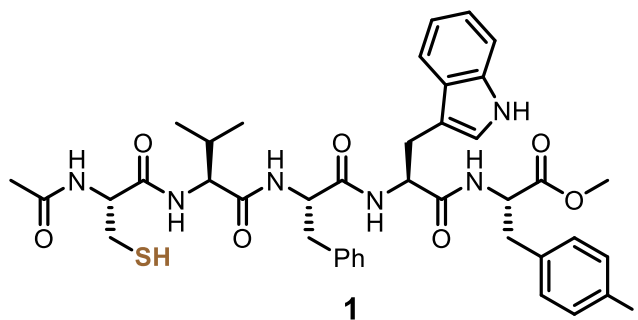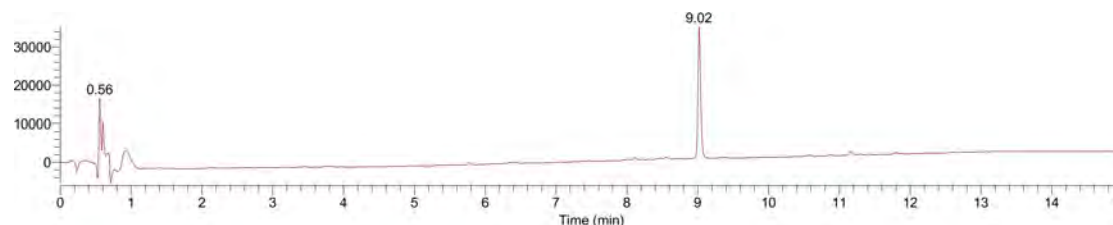

$t_R = 9.02$  min, 5% to 95% B for 10 min, then 95% B 10-15 min,  $\lambda = 254$  nm

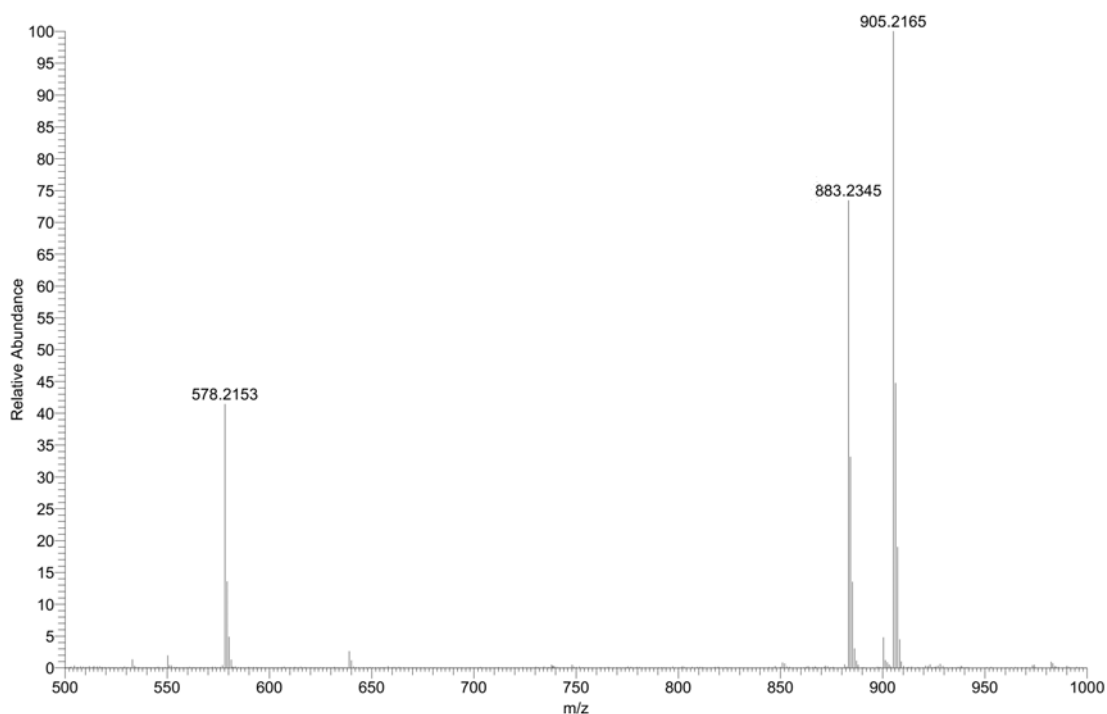

**HRMS:** Calcd for  $C_{40}H_{47}IN_6O_7S$   $[M+H]^+$ :883.2344; found: 883.2345

**$^1H$  NMR (400 MHz, 5%MeOD in DMSO)**  $\delta$  8.42 (d,  $J = 7.6$  Hz, 1H), 8.12 (dd,  $J = 8.0, 3.5$  Hz, 1H), 7.96 (d,  $J = 8.0$  Hz, 1H), 7.78 (d,  $J = 8.8$  Hz, 1H), 7.57 (dd,  $J = 14.0, 8.0$  Hz, 3H), 7.32 (t,  $J = 8.0$  Hz, 2H), 7.25-7.03 (m, 9H), 7.00-6.95 (m, 2H), 4.57 (dd,  $J = 9.4, 5.4$  Hz, 2H), 4.49-4.34 (m, 2H), 4.09 (dd,  $J = 8.8, 6.4$  Hz, 1H), 3.57 (s, 3H), 3.06 (dd,  $J = 14.8, 6.0$  Hz, 1H), 2.99-2.82 (m, 4H), 2.77-2.65 (m, 2H), 2.64-2.56 (m, 1H), 2.20 (t,  $J = 8.4$  Hz, 1H), 1.87 (s, 3H), 0.70 (dd,  $J = 6.9, 2.0$  Hz, 6H).

### 3. Optimization of intramolecular C-S arylation reaction

#### General procedure for optimization of reaction conditions

The linear peptide **1** (88.2 mg, 0.1 mmol, 1.0 equiv),  $G_3$ -XantPhos catalyst (**4.8 mg, 5 mol%**), base and solvent were added into a 8 mL glass vial according the specific conditions listed below. The vial was sealed with PTFE cap (air and moisture were not vigorously excluded). The reaction mixture was stirred at room temperature. 50  $\mu$ L of the mixture was taken out. Then 1 mL MeOH was added to dissolve the residue and the insoluble was removed by filtration with filter membrane (0.2  $\mu$ m), the filtrate was used for LCMS analysis.

#### Evaluation of different solvents

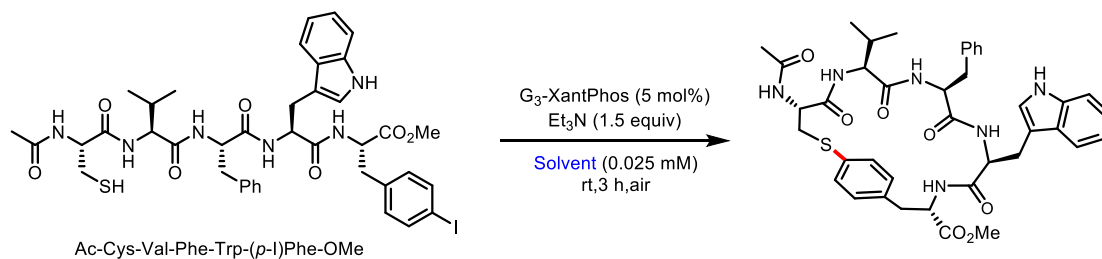

| Entry | Solvent                         | Yield (%) <sup>a</sup> |
|-------|---------------------------------|------------------------|
| 1     | 20% water in THF                | 74                     |
| 2     | 40% water in THF                | 81                     |
| 3     | 60% water in THF                | 66                     |
| 4     | 80% water in THF                | 40                     |
| 5     | water                           | <10                    |
| 6     | 20% water in Acetone            | 64                     |
| 7     | 20% water in CH <sub>3</sub> CN | 82                     |
| 8     | 20% water in dioxane            | 30                     |
| 9     | 20% water in MeOH               | <10                    |
| 10    | 20% water in EtOH               | <10                    |
| 11    | 20% water in HFIP               | <10                    |

a: LCMS Yield

## Scheme S2

### Evaluation of different bases

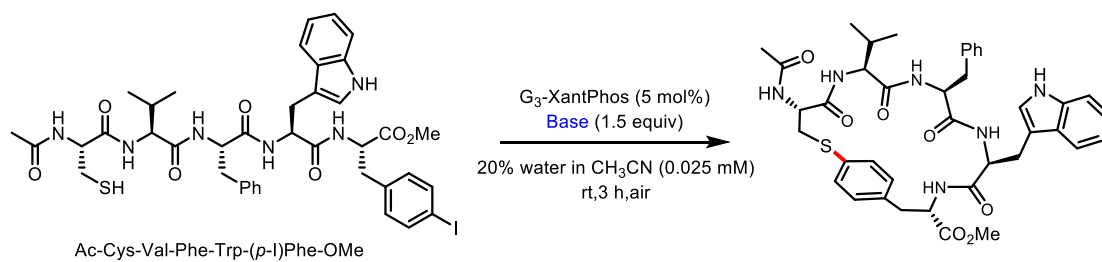

| Entry | Base               | Yield (%) <sup>a</sup> |
|-------|--------------------|------------------------|
| 1     | Et <sub>3</sub> N  | 82                     |
| 2     | 4-Methylmorpholine | 62                     |
| 3     | TMEDA              | 57                     |
| 4     | DIPEA              | 84                     |

|   |                                 |    |
|---|---------------------------------|----|
| 5 | DMAP                            | 62 |
| 6 | TEDA                            | 50 |
| 7 | K <sub>2</sub> CO <sub>3</sub>  | 37 |
| 8 | PhCOOK                          | 42 |
| 9 | Cs <sub>2</sub> CO <sub>3</sub> | 47 |

a: LCMS Yield

### Scheme S3

**The Optimized condition for Pd-catalyzed intramolecular C-S arylation of peptide 1 is:** peptide 1 (44.1 mg, 0.05 mmol, 1.0 equiv), G<sub>3</sub>-XantPhos catalyst (2.4 mg, 5 mol%), DIPEA (26.0 μL, 0.15 mmol, 1.5 equiv), in 20% water in Acetonitrile (2 mL), rt, 3 h.

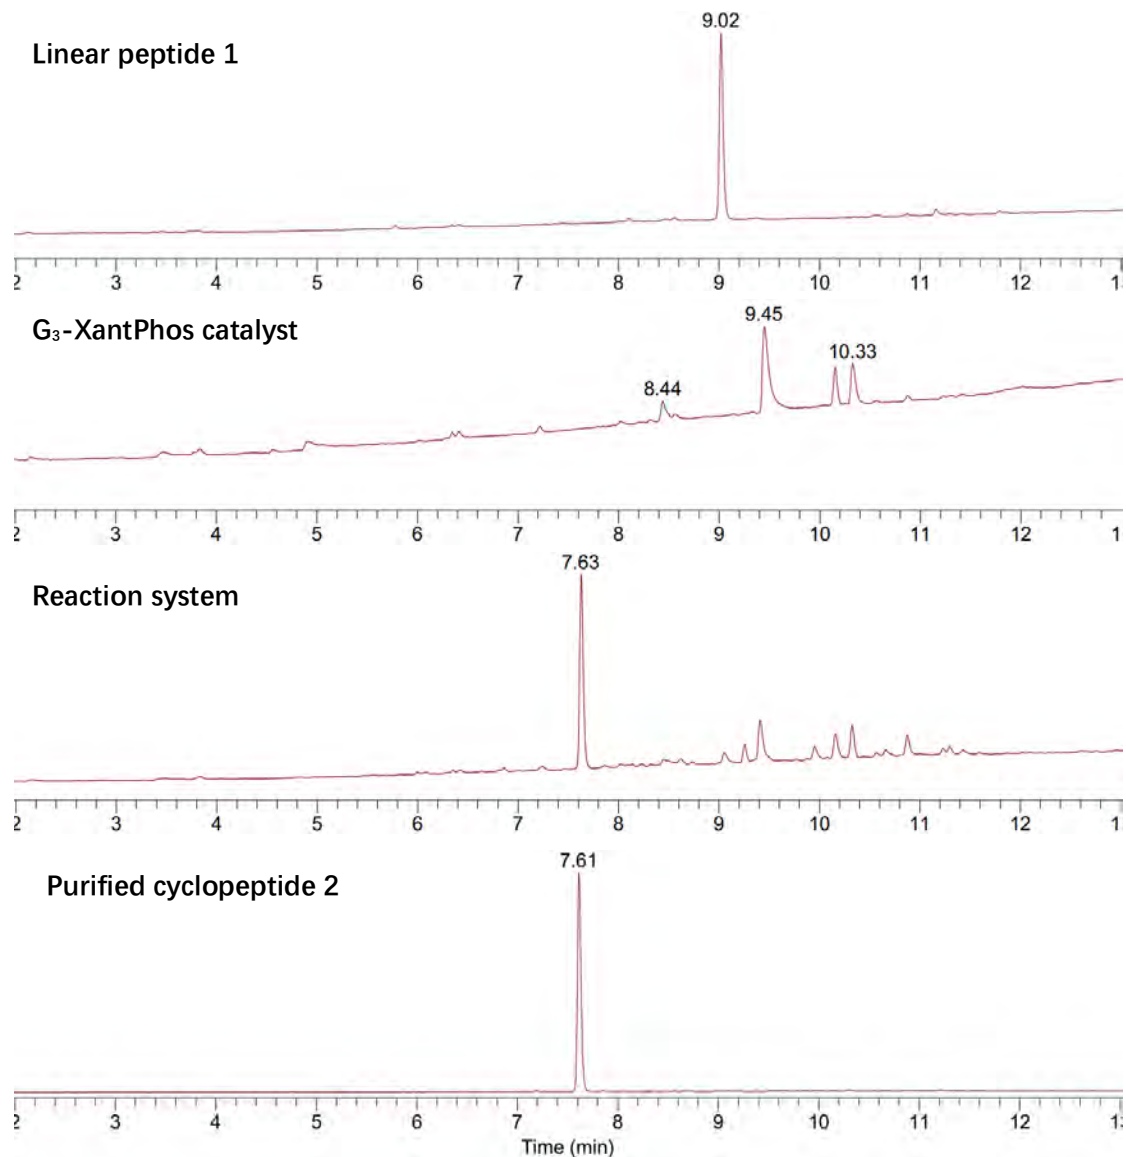

**Scheme S4.** HPLC spectrum of the intramolecular C-S arylation reaction of compound **1** under optimal condition.

#### 4. General procedure for Pd-catalyzed peptide macrocyclization

##### General condition A:

A mixture of linear peptide substrate (0.1 mmol, 1.0 equiv), G<sub>3</sub>-XantPhos catalyst (4.7 mg, 5 mol%), and DIPEA (52.0  $\mu$ L, 0.1 mmol, 1.5 equiv) in 2 mL of 20% water in Acetonitrile was stirred in a 8 mL glass vial (sealed with PTFE cap under air atmosphere) at rt for 3 hours. The reaction mixture was diluted with MeOH (5 mL) and filtered through a pad of celite. The filtrate was concentrated *in vacuo* and the resulting residue was purified by silica gel flash chromatography to give the cyclized product.

##### General conditions B (heated at 45 °C):

A mixture of linear peptide substrate (0.1 mmol, 1.0 equiv), G<sub>3</sub>-XantPhos catalyst (4.7 mg, 5 mol%), and DIPEA (52.0  $\mu$ L, 0.1 mmol, 1.5 equiv) in 2 mL of 20% water in Acetonitrile was heated in a 8 mL glass vial (sealed with PTFE cap under air atmosphere) at 45 °C for 2 hours. After been cooled to room temperature, the reaction mixture was diluted with MeOH (5 mL) and filtered through a pad of celite. The filtrate was concentrated *in vacuo* and the resulting residue was purified by silica gel flash chromatography to give the cyclized product.

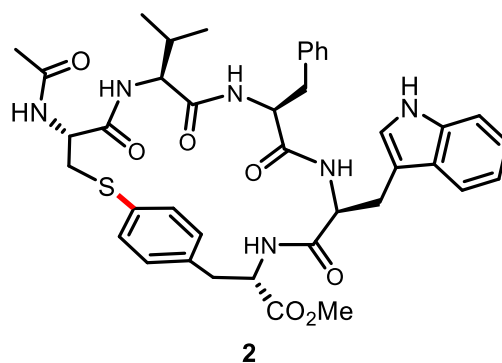

Compound **2** was isolated in 72% yield (54 mg) as a white powder under the general condition A.

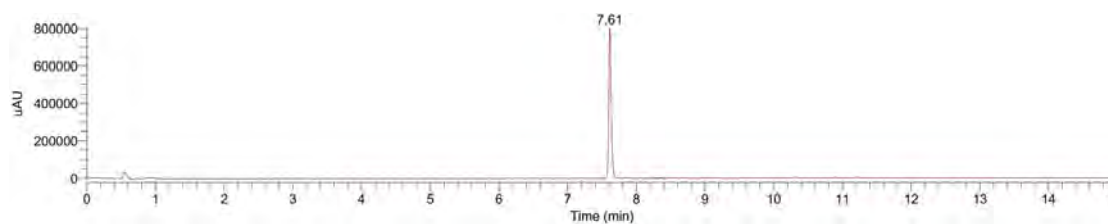

$t_R = 7.61$  min, 5% to 95% B for 10 min, then 95% B 10-15 min,  $\lambda = 254$  nm

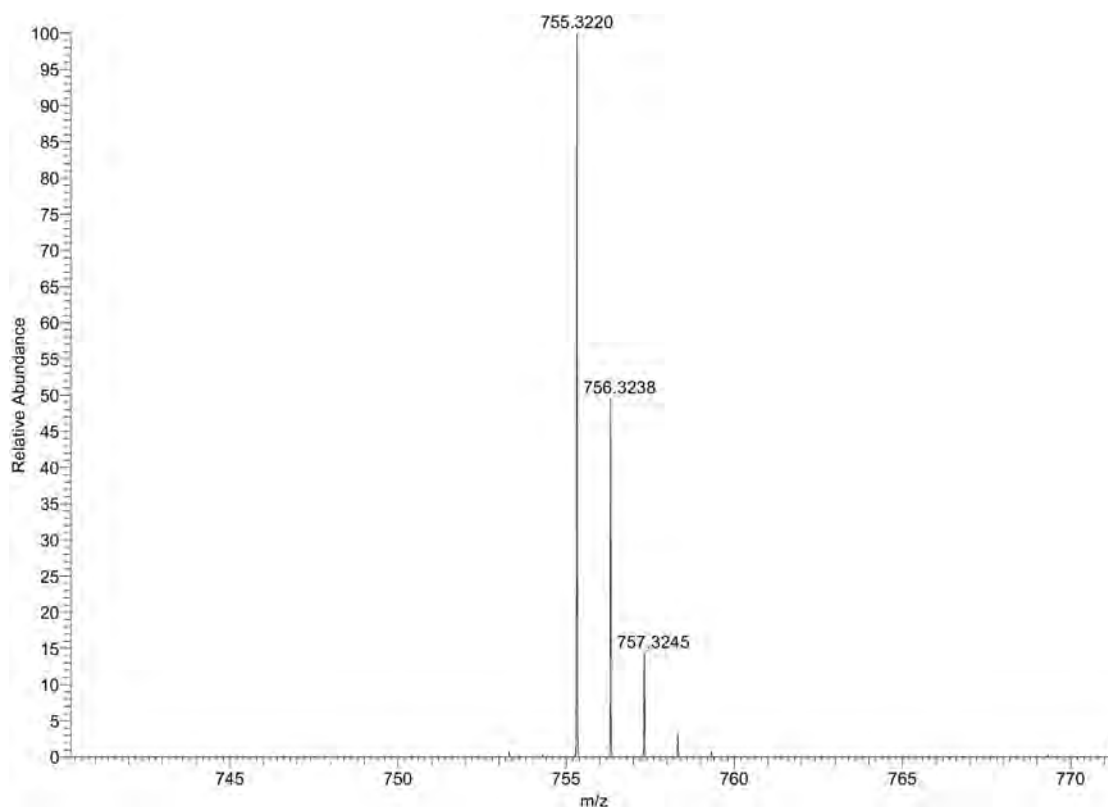

**HRMS:** Calcd for  $C_{40}H_{46}N_6O_7S$   $[M+H^+]$ :755.3221; found: 755.3220

**$^1H$  NMR (400 MHz,  $CD_3Cl$ )**  $\delta$  7.42 (d,  $J = 7.8$  Hz, 1H), 7.32 (dd,  $J = 10.8, 8.2$  Hz, 3H), 7.23-7.14 (m, 4H), 7.08 (dd,  $J = 23.6, 7.8$  Hz, 3H), 7.00-6.89 (m, 3H), 6.78 (d,  $J = 6.8$  Hz, 1H), 6.61-6.54 (m, 2H), 6.15 (d,  $J = 7.6$  Hz, 1H), 4.78 (t,  $J = 10.8$  Hz, 1H), 4.64-4.48 (m, 2H), 4.23-4.16 (m, 1H), 3.98 (t,  $J = 6.4$  Hz, 1H), 3.77 (s, 3H), 3.46 (dd,  $J = 13.8, 4.7$  Hz, 1H), 3.38-3.20 (m, 2H), 3.12 (dd,  $J = 14.0, 7.8$  Hz, 1H), 2.92 (m, 1H), 2.83 (dd,  $J = 14.2, 10.0$  Hz, 1H), 2.56 (dd,  $J = 13.8, 7.2$  Hz, 1H), 2.38-2.27 (m, 1H), 2.24-2.13 (m, 1H), 2.09 (s, 3H), 0.84 (d,  $J = 6.8$  Hz, 3H), 0.72 (d,  $J = 6.8$  Hz, 3H).

**$^{13}C$  NMR (101 MHz, DMSO)**  $\delta$  174.27, 172.15, 171.50, 170.33, 170.15, 169.49, 137.62, 136.04, 135.23, 133.68, 130.12, 129.89, 129.61, 129.17, 127.87, 127.14, 126.11, 123.45, 120.92, 118.39, 118.18, 111.30, 109.84, 58.77, 53.53, 53.06, 52.37, 52.17,

52.07, 35.08, 31.24, 29.65, 26.52, 25.07, 22.29, 22.05, 18.94, 17.50, 13.90.

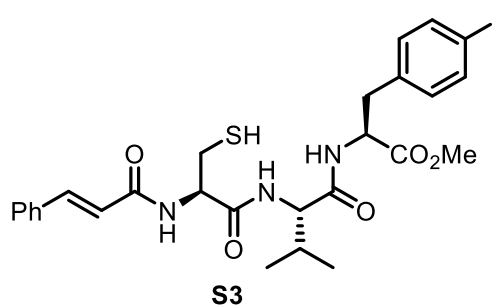

Compound **S3** was prepared as a white solid in 92% yield from 2-Cl-Trt resin following the SPPS procedure.

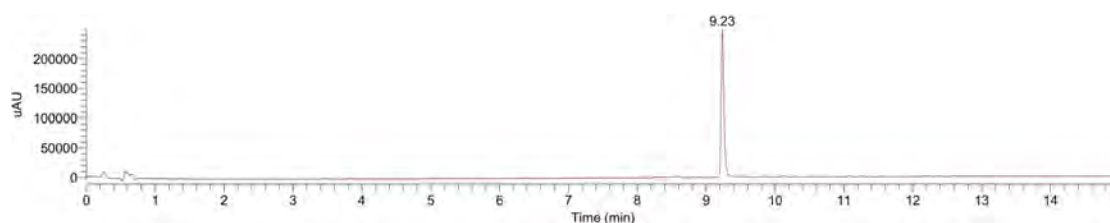

$t_R = 9.23$  min, 5% to 95% B for 10 min, then 95% B 10-15 min,  $\lambda = 254$  nm

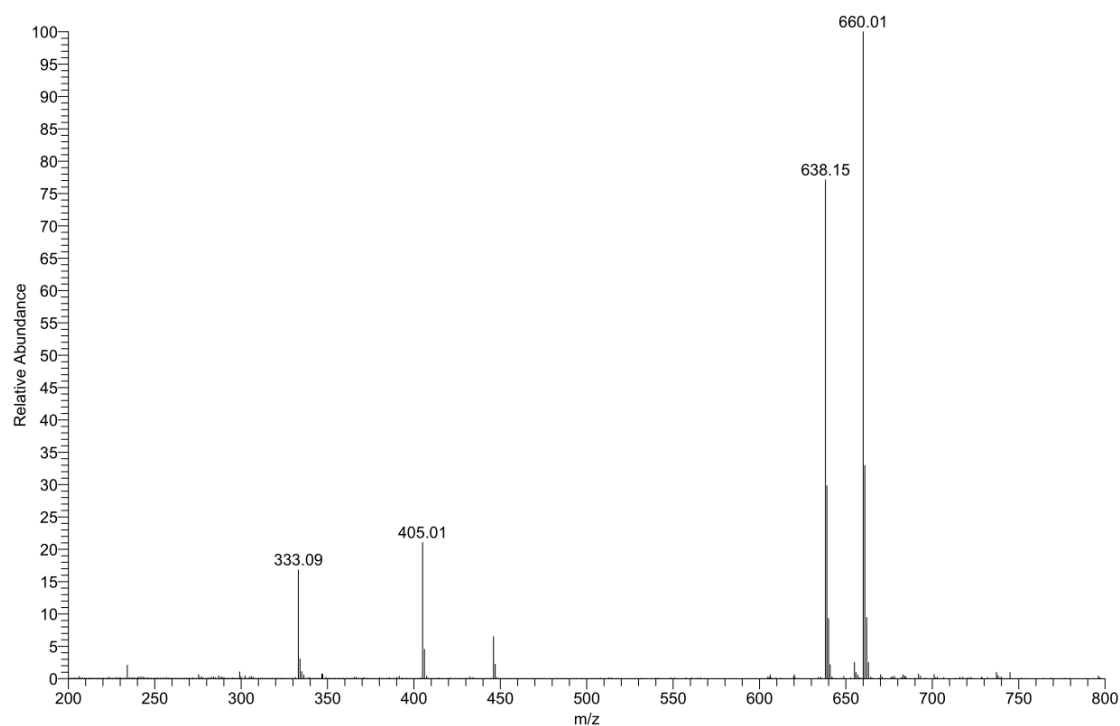

**LRMS:**  $[M+H]^+$  638.15;  $[M+Na]^+$  660.01.

**<sup>1</sup>H NMR (400 MHz, AcOD)**  $\delta$  7.77-7.56 (m, 5H), 7.43-7.38 (m, 3H), 7.04-6.96 (m, 2H), 6.76 (d,  $J = 15.8$  Hz, 1H), 4.94 (dd,  $J = 7.4, 5.2$  Hz, 2H), 4.43 (d,  $J = 8.0$  Hz, 1H), 3.77 (s, 3H), 3.23-3.16 (m, 1H), 3.14-2.98 (m, 2H), 2.98-2.84 (m, 2H), 0.97-0.90 (m,

6H).

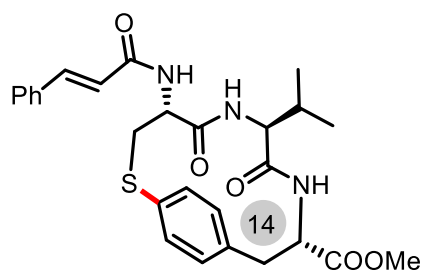

**3** (25%)

Compound **3** was isolated in 25% yield (13 mg) as a white powder under the general condition A.

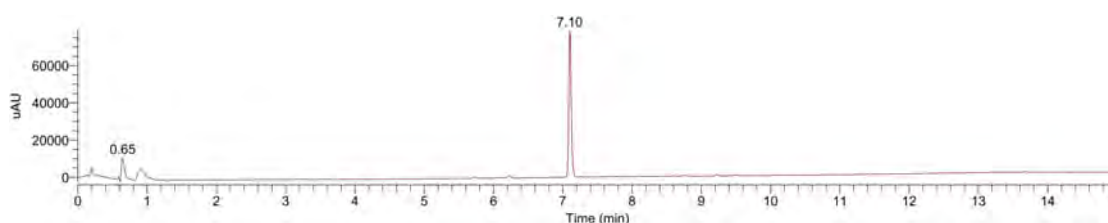

$t_R = 7.10$  min, 5% to 95% B for 10 min, then 95% B 10-15 min,  $\lambda = 254$  nm

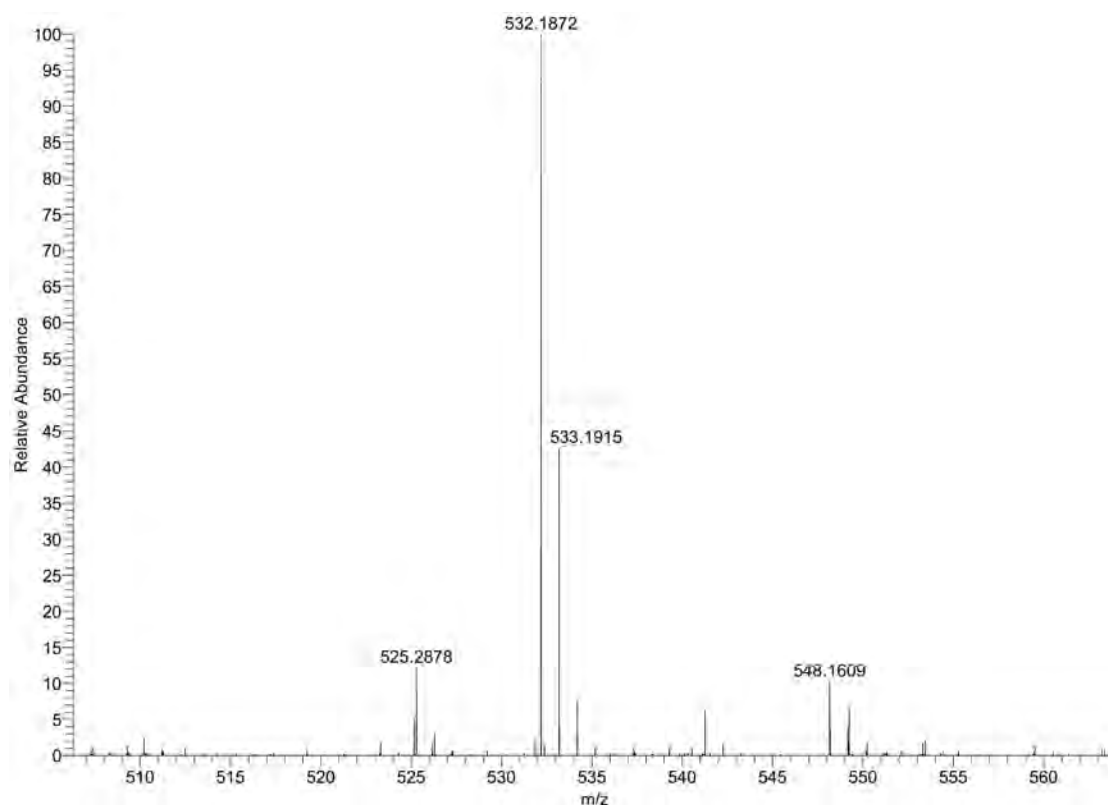

**HRMS:** Calcd for  $C_{27}H_{31}N_3O_5S$   $[M+Na^+]$ : 532.1877; found: 532.1872

**$^1H$  NMR (600 MHz, AcOD)**  $\delta$  7.40 (t,  $J = 11.4$  Hz, 4H), 7.27-7.20 (m, 3H), 7.18-7.11 (m, 3H), 6.96 (d,  $J = 8.0$  Hz, 1H), 5.44 (d,  $J = 4.4$  Hz, 1H), 5.38 (d,  $J = 5.0$  Hz, 2H),



3.82 (s, 3H), 3.67 (d,  $J = 4.4$  Hz, 1H), 3.61 (d,  $J = 16.4$  Hz, 1H), 3.49 (d,  $J = 21.0$  Hz, 3H), 1.47 (d,  $J = 12.8$  Hz, 1H), 0.81 (dd,  $J = 30.2, 6.4$  Hz, 6H).

$^{13}\text{C}$  NMR (101 MHz, DMSO)  $\delta$  174.63, 171.28, 169.60, 167.45, 139.08, 136.82, 134.85, 129.47, 128.68, 127.51, 122.01, 57.20, 53.59, 52.04, 51.92, 35.13, 31.26, 26.55, 25.10.

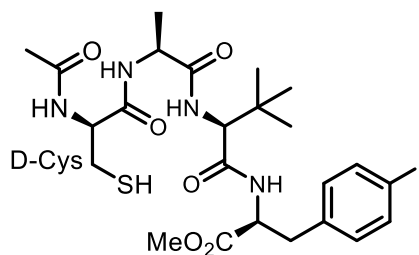

**S4**

Compound **S4** was prepared as a white solid in 93% yield from 2-Cl-Trt resin following the SPPS procedure.

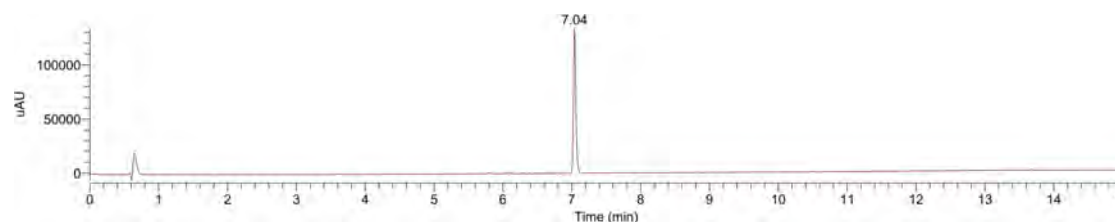

$t_R = 7.04$  min, 5% to 95% B for 10 min, then 95% B 10-15 min,  $\lambda = 254$  nm

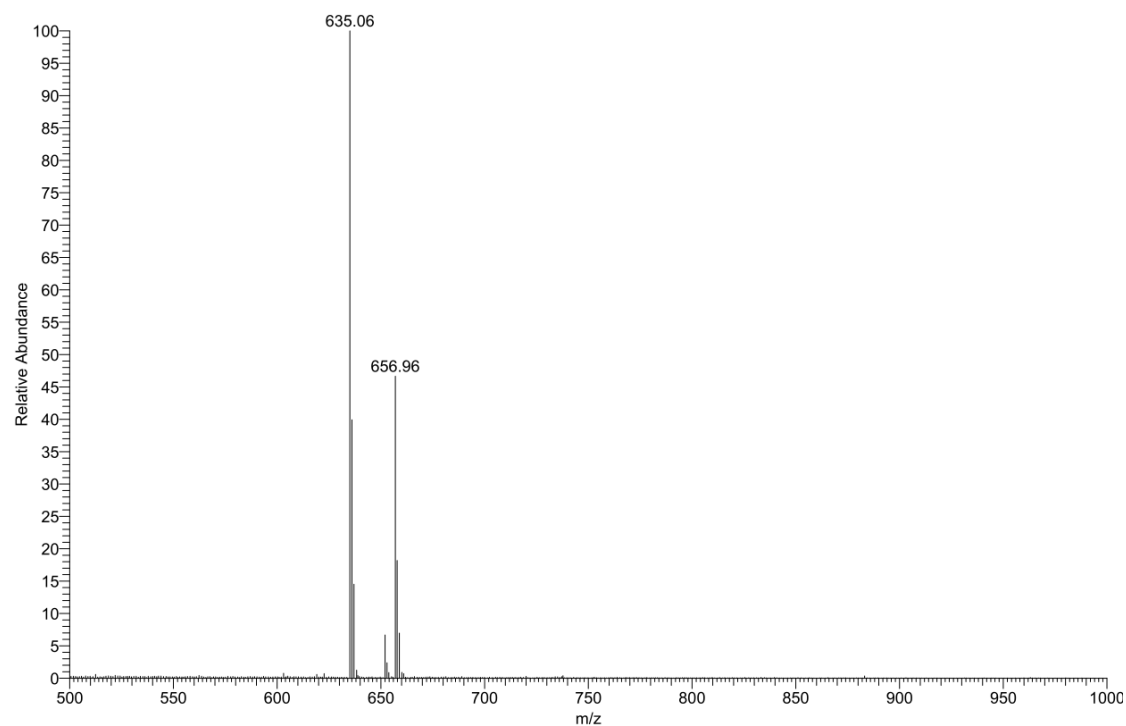

**S13**

**LRMS:**  $[M+H]^+$  635.06;  $[M+Na]^+$  656.96.

**$^1H$  NMR (400 MHz, MeOD)**  $\delta$  7.62 (d,  $J = 8.0$  Hz, 2H), 7.01 (d,  $J = 8.0$  Hz, 2H), 4.71 (dd,  $J = 8.8, 5.6$  Hz, 1H), 4.53 (t,  $J = 6.4$  Hz, 1H), 4.42 (q,  $J = 7.0$  Hz, 1H), 4.26 (s, 1H), 3.71 (s, 3H), 3.15 (dd,  $J = 13.8, 5.4$  Hz, 1H), 2.94 (dd,  $J = 13.8, 9.0$  Hz, 1H), 2.89-2.75 (m, 2H), 2.03 (s, 3H), 1.34 (d,  $J = 7.0$  Hz, 3H), 0.98 (s, 9H).

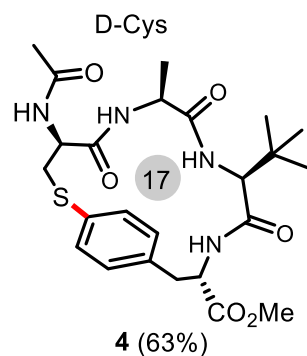

Compound **4** was isolated in 31% yield (17 mg) as a white powder under the general condition A.

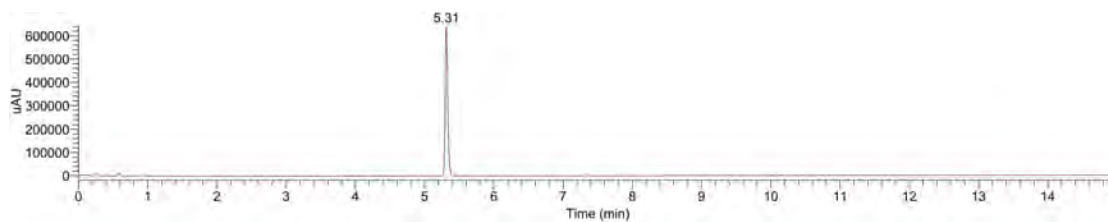

$t_R = 5.31$  min, 5% to 95% B for 10 min, then 95% B 10-15 min,  $\lambda = 254$  nm

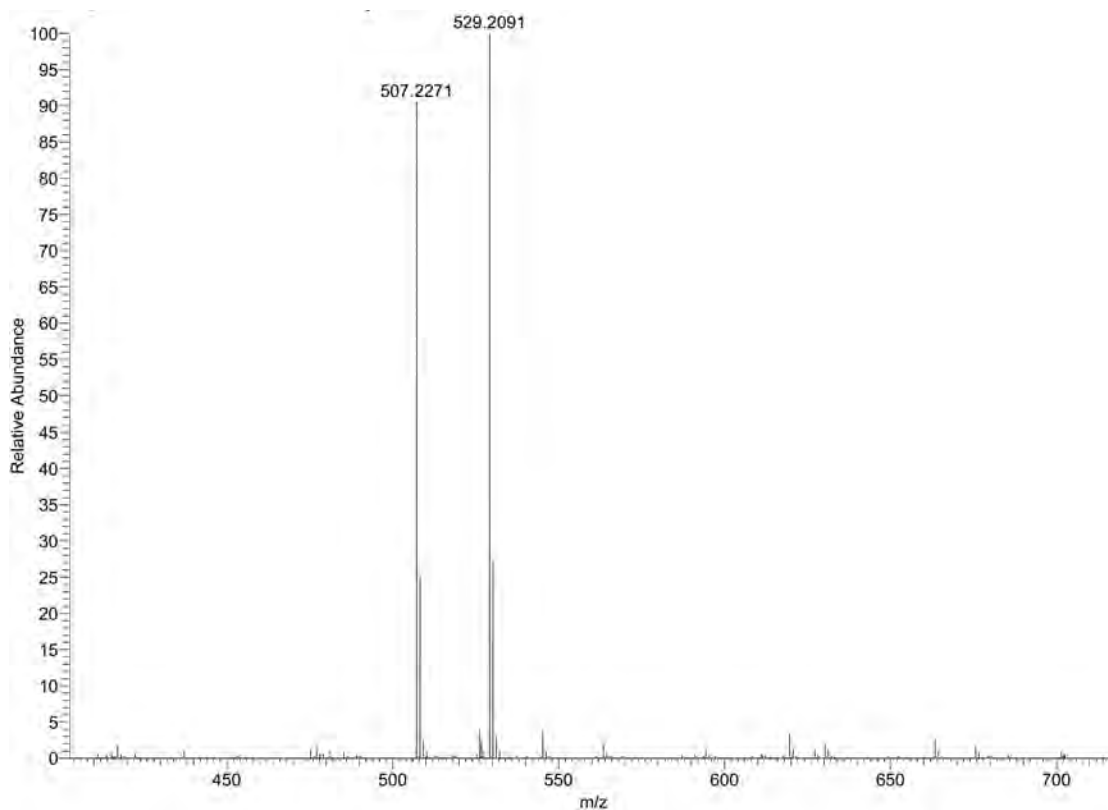

**HRMS:** Calcd for  $C_{24}H_{34}N_4O_6S$   $[M+H^+]$ : 507.2272; found: 507.2271

**$^1H$  NMR (400 MHz, MeOD)**  $\delta$  7.23 (d,  $J = 8.0$  Hz, 2H), 7.06 (d,  $J = 8.0$  Hz, 2H), 4.74 (s, 1H), 4.60 (d,  $J = 7.4$  Hz, 1H), 4.27 (dd,  $J = 14.8, 7.6$  Hz, 1H), 4.23 (d,  $J = 6.4$  Hz, 1H), 3.82 (s, 3H), 3.28 (d,  $J = 13.0$  Hz, 1H), 3.20 (dd,  $J = 15.0, 7.5$  Hz, 1H), 2.99 (dd,  $J = 14.8, 10.2$  Hz, 1H), 2.57 (t,  $J = 12.8$  Hz, 1H), 2.07 (s, 3H), 1.43-1.39 (m, 3H), 0.92 (s, 9H).

**$^{13}C$  NMR (101 MHz, DMSO)**  $\delta$  171.81, 171.74, 170.18, 169.68, 169.21, 136.89, 133.95, 131.07, 130.50, 130.10, 59.62, 55.22, 52.63, 52.54, 52.18, 35.41, 31.73, 29.46, 29.13, 27.00, 26.86, 22.97, 19.16, 19.08.

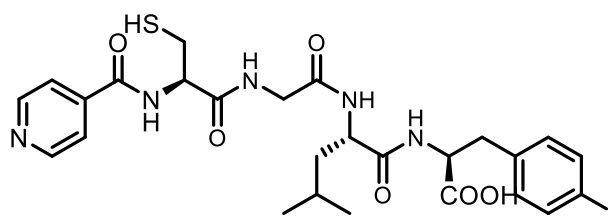

**S5**

Compound **S5** was prepared as a white solid in 90% yield from 2-Cl-Trt resin following the SPPS procedure.

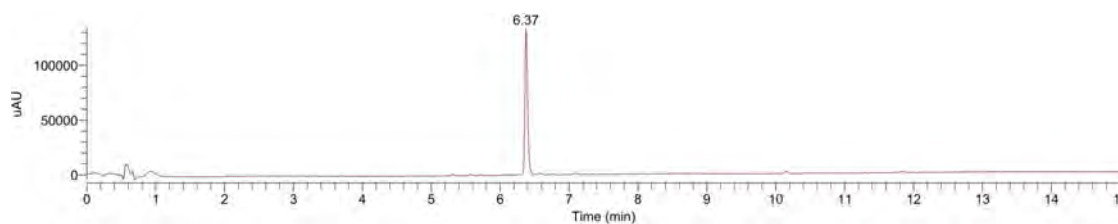

$t_R = 6.37$  min, 5% to 95% B for 10 min, then 95% B 10-15 min,  $\lambda = 254$  nm

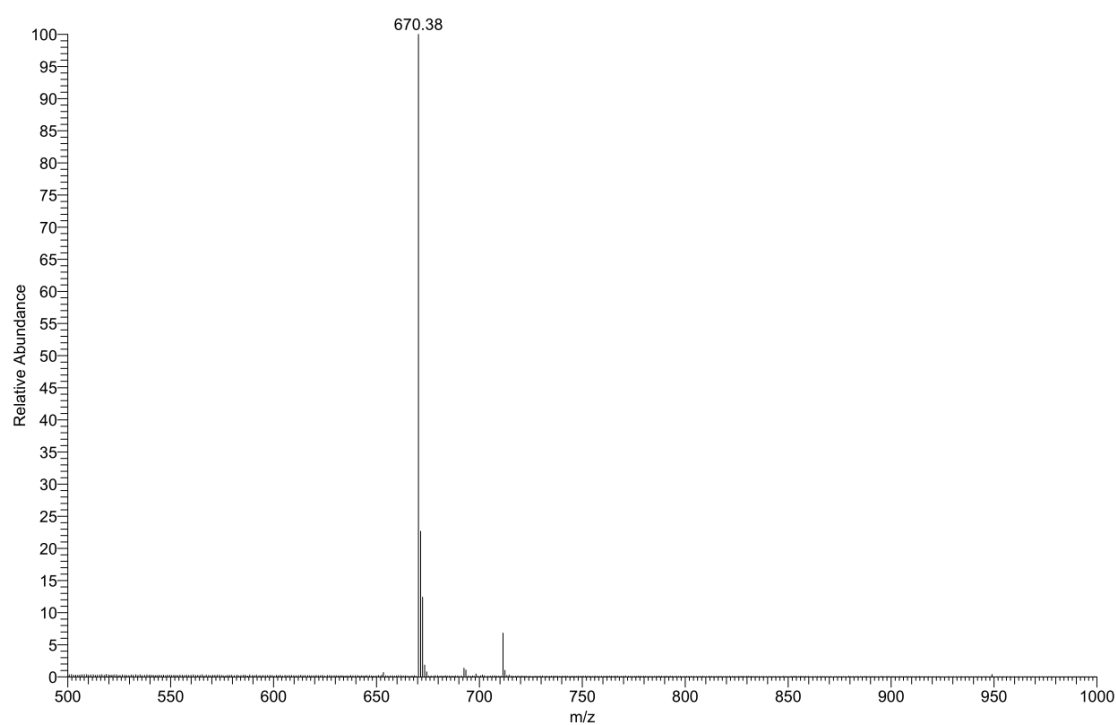

**LRMS:**  $[M+H]^+$  670.38.

**$^1H$  NMR (400 MHz, MeOD)**  $\delta$  8.81 (d,  $J = 5.2$  Hz, 2H), 8.04 (d,  $J = 4.5$  Hz, 2H), 7.60 (d,  $J = 7.8$  Hz, 2H), 7.02 (d,  $J = 7.9$  Hz, 2H), 4.70-4.53 (m, 2H), 4.43 (d,  $J = 7.6$  Hz, 1H), 4.01-3.76 (m, 2H), 3.22-3.04 (m, 2H), 2.97 (t,  $J = 11.6$  Hz, 2H), 1.58 (s, 1H), 1.51 (t,  $J = 7.3$  Hz, 2H), 0.85 (d,  $J = 5.1$  Hz, 6H).

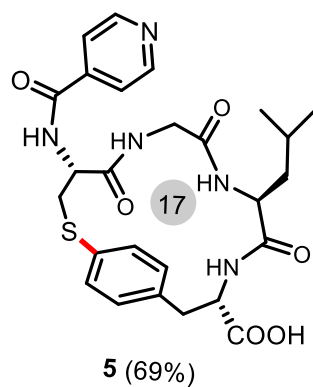

Compound **5** was isolated in 69% yield (37 mg) as a white powder (TFA salt) under the

general condition A.

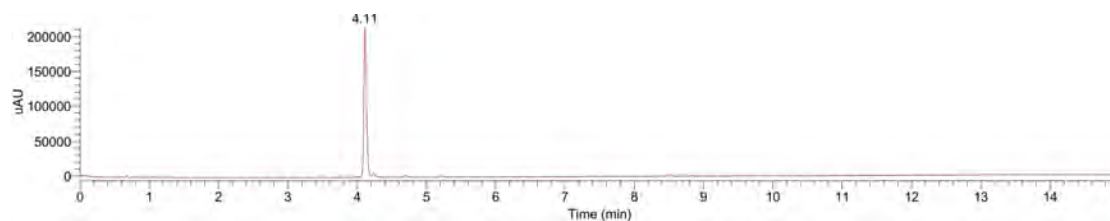

$t_R = 4.11$  min, 5% to 95% B for 10 min, then 95% B 10-15 min,  $\lambda = 254$  nm

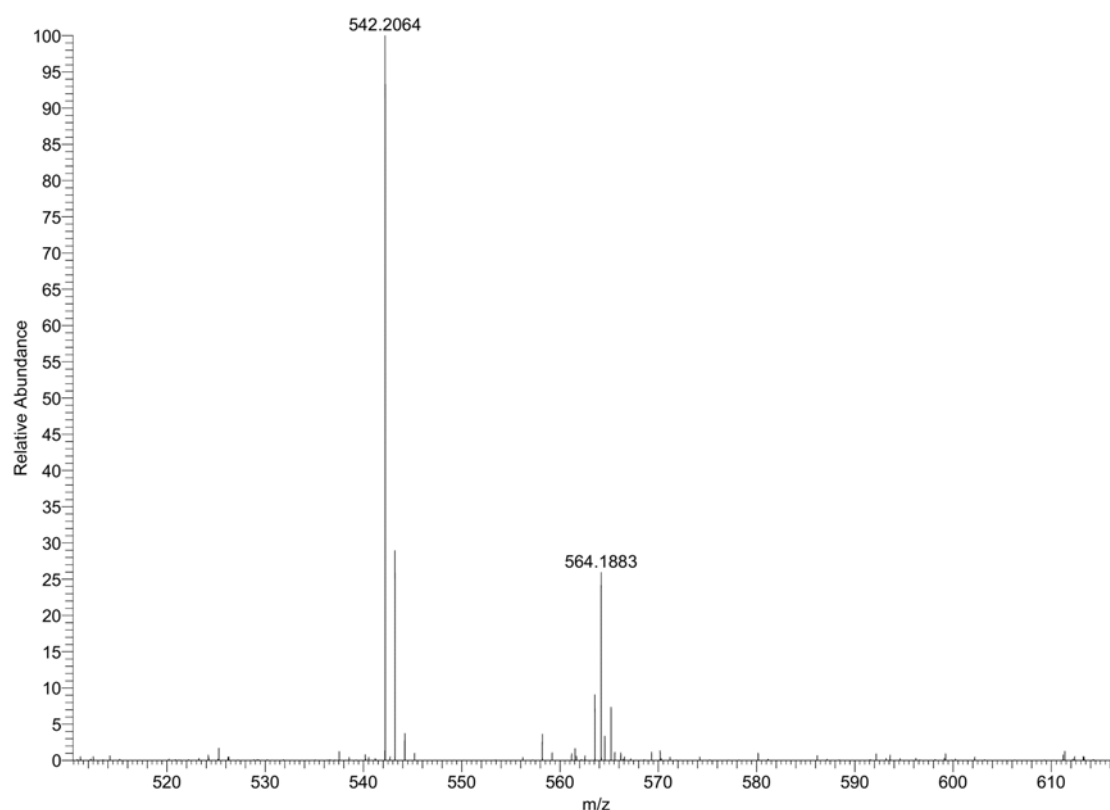

**HRMS:** Calcd for  $C_{26}H_{31}N_5O_6S$   $[M+H]^+$ : 542.2068; found: 542.2064

**$^1H$  NMR (400 MHz, 5%  $D_2O$  in DMSO)**  $\delta$  8.67 (d,  $J = 5.2$  Hz, 2H), 7.81-7.73 (m, 2H), 7.22 (d,  $J = 8.2$  Hz, 2H), 7.05 (d,  $J = 8.2$  Hz, 2H), 4.57-4.46 (m, 1H), 4.39 (d,  $J = 4.0$  Hz, 1H), 3.79-3.70 (d,  $J = 15.2$  Hz, 1H), 3.46 (t,  $J = 3.8$  Hz, 2H), 3.25 (s, 1H), 3.17-3.03 (m, 2H), 2.89-2.75 (m, 1H), 1.60-1.46 (m, 1H), 1.45-1.35 (m, 2H), 0.79 (d,  $J = 6.4$  Hz, 6H).

**$^{13}C$  NMR (101 MHz, DMSO)**  $\delta$  171.11, 169.39, 168.03, 164.66, 150.75, 141.16, 136.42, 133.11, 130.45, 130.11, 121.86, 55.80, 53.37, 51.13, 42.66, 35.58, 31.73, 27.01, 24.51, 23.13, 22.59, 22.54.

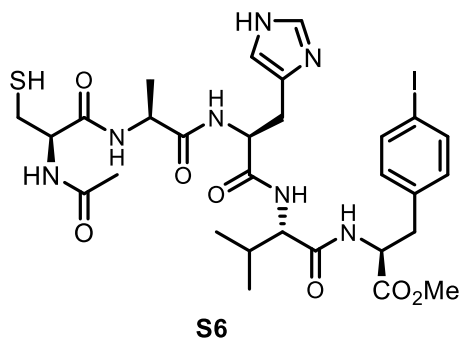

Compound **S6** was prepared as a white solid in 85% yield from 2-Cl-Trt resin following the SPPS procedure.

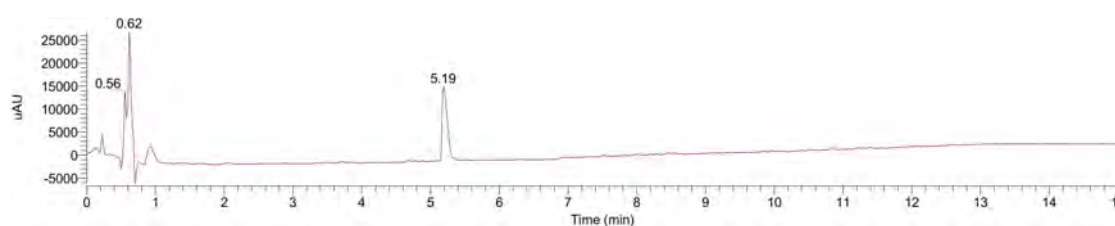

$t_R = 5.19$  min, 5% to 95% B for 10 min, then 95% B 10-15 min,  $\lambda = 254$  nm

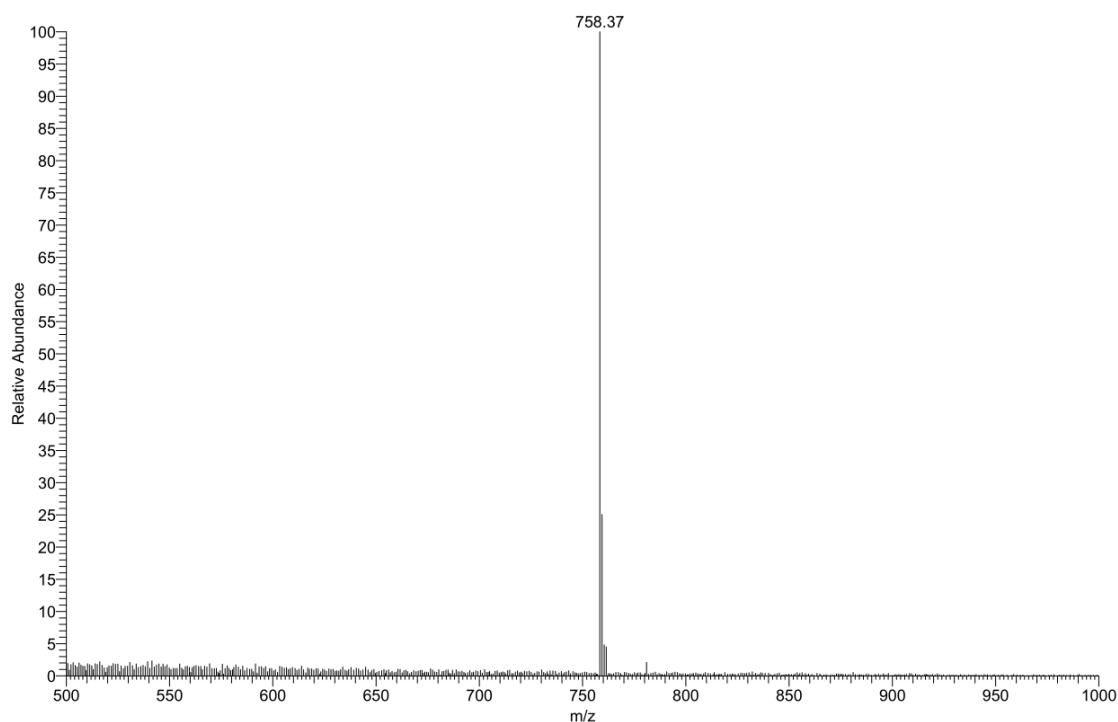

**LRMS:**  $[M+H]^+$  758.37.

**$^1H$  NMR (400 MHz, AcOD)**  $\delta$  8.68 (s, 1H), 7.60 (d,  $J = 7.8$  Hz, 2H), 7.15 (s, 1H), 7.02 (d,  $J = 7.8$  Hz, 2H), 4.69 (s, 2H), 4.47 (t,  $J = 5.8$  Hz, 1H), 4.29 (d,  $J = 7.0$  Hz, 1H), 4.15 (d,  $J = 6.8$  Hz, 1H), 3.68 (s, 3H), 3.33 (s, 1H), 3.25-3.02 (m, 3H), 3.00-2.74 (m, 3H),

1.34 (d,  $J = 6.8$  Hz, 3H), 0.91 (t,  $J = 6.0$  Hz, 6H).

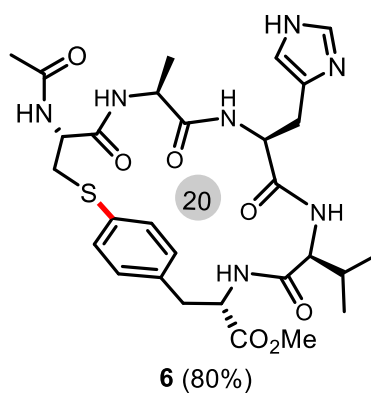

Compound **6** was isolated in 80% yield (50 mg) as a white powder (TFA salt) under the general condition A.

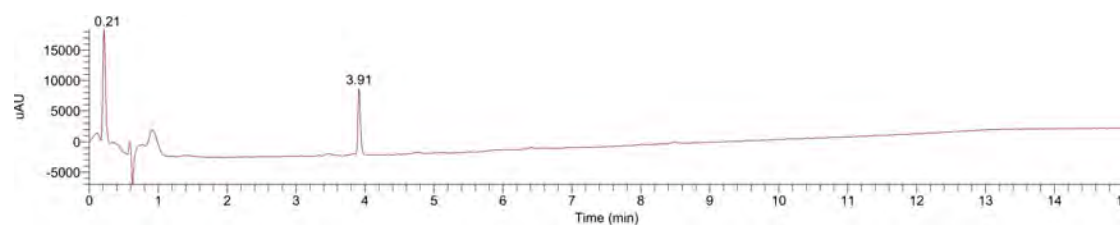

$t_R = 3.91$  min, 5% to 95% B for 10 min, then 95% B 10-15 min,  $\lambda = 254$  nm

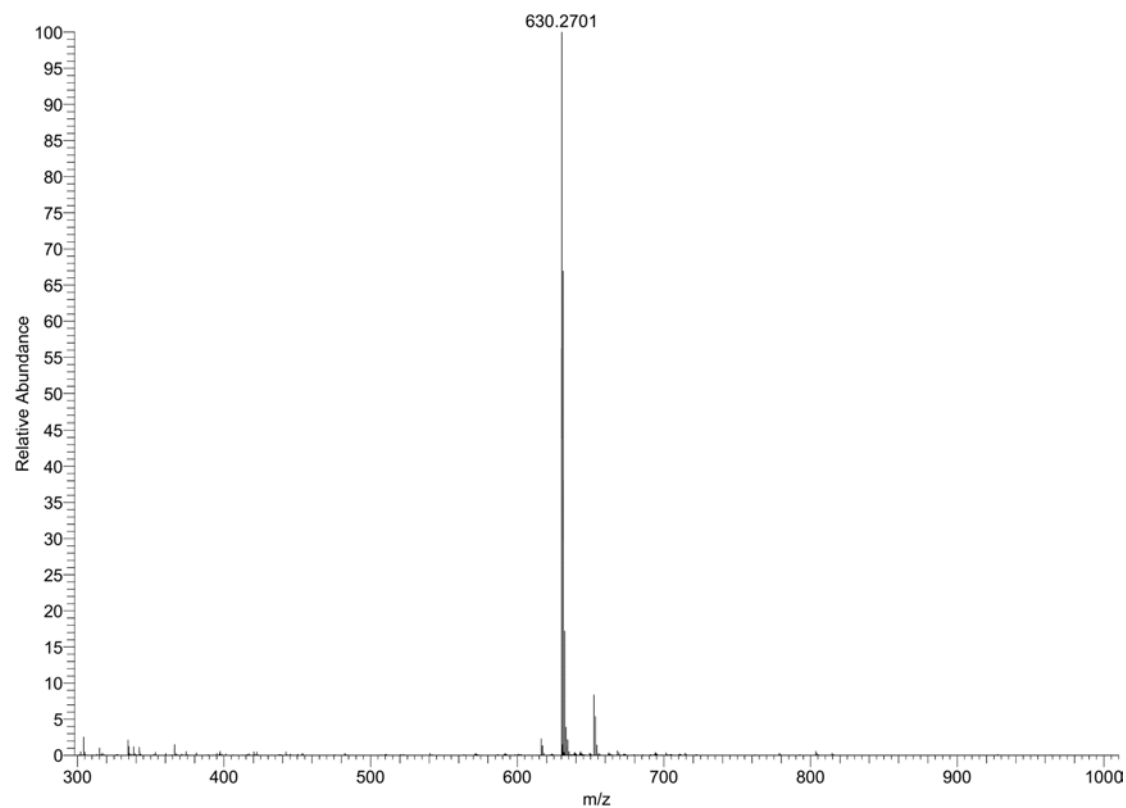

**HRMS:** Calcd for C<sub>29</sub>H<sub>39</sub>N<sub>7</sub>O<sub>7</sub>S [M+H<sup>+</sup>]: 630.2704; found: 630.2701

**<sup>1</sup>H NMR (400 MHz, MeOD)**  $\delta$  8.29 (s, 1H), 7.34 (d,  $J = 8.2$  Hz, 2H), 7.21 (d,  $J = 8.0$  Hz, 2H), 7.10-7.04 (m, 1H), 4.85 (d,  $J = 12.4$  Hz, 1H), 4.56 (d,  $J = 4.6$  Hz, 1H), 4.50 (t,  $J = 7.4$  Hz, 1H), 4.39 (q,  $J = 7.2$  Hz, 1H), 3.89 (d,  $J = 6.6$  Hz, 1H), 3.78 (s, 3H), 3.34 (d,  $J = 3.4$  Hz, 1H), 3.21 (d,  $J = 7.4$  Hz, 2H), 3.08 (d,  $J = 15.2$  Hz, 1H), 2.95 (d,  $J = 10.0$  Hz, 1H), 2.80 (t,  $J = 13.2$  Hz, 1H), 2.13-2.05 (m, 1H), 1.34 (d,  $J = 7.2$  Hz, 3H), 1.00 (dd,  $J = 15.6, 6.8$  Hz, 6H).

**<sup>13</sup>C NMR (101 MHz, MeOD)**  $\delta$  172.92, 172.35, 172.03, 171.72, 171.36, 169.62, 135.90, 134.42, 133.39, 130.88, 129.81, 129.62, 118.41, 59.41, 53.25, 53.14, 51.52, 51.39, 48.94, 37.94, 36.13, 29.83, 28.24, 20.97, 18.14, 17.14, 15.55.

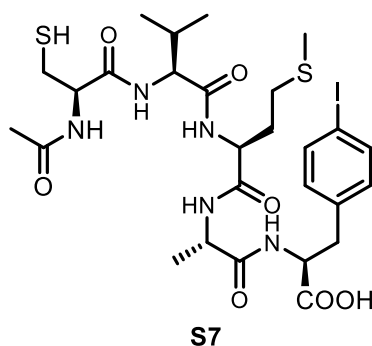

Compound **S7** was prepared as a white solid in 87% yield from 2-Cl-Trt resin following the SPPS procedure.

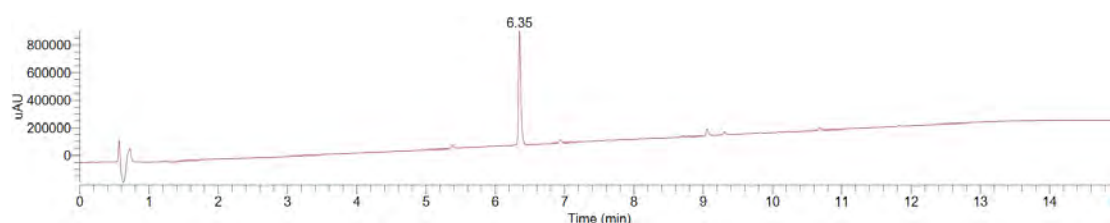

$t_R = 7.79$  min, 5% to 95% B for 10 min, then 95% B 10-15 min,  $\lambda = 254$  nm



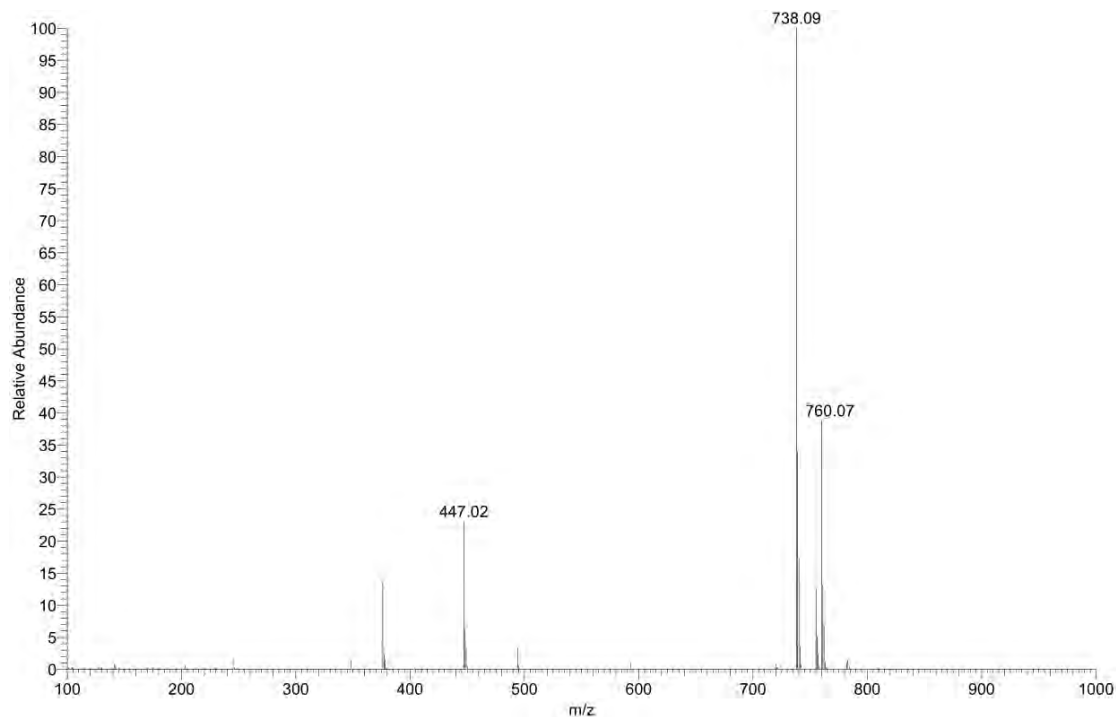

**LRMS:**  $[M+H]^+$  738.09;  $[M+Na]^+$  760.07.

**$^1\text{H NMR}$  (400 MHz, MeOD)**  $\delta$  8.38 (d,  $J = 4.9$  Hz, 2H), 7.80 (d,  $J = 5.1$  Hz, 2H), 5.25 (dd,  $J = 7.7, 5.5$  Hz, 1H), 5.15 (dd,  $J = 9.0, 4.8$  Hz, 1H), 5.11-5.00 (m, 3H), 3.94 (s, 2H), 3.82 (dd,  $J = 13.6, 5.0$  Hz, 1H), 3.68 (dd,  $J = 13.6, 6.7$  Hz, 1H), 3.57 (dd,  $J = 13.5, 5.6$  Hz, 1H), 3.46 (dd,  $J = 13.7, 7.9$  Hz, 1H), 3.28-3.18 (m, 2H), 2.69 (s, 3H), 2.63-2.53 (m, 1H), 2.04 (s, 3H), 1.98 (d,  $J = 7.1$  Hz, 3H), 1.64 (dd,  $J = 8.1, 5.4$  Hz, 6H).

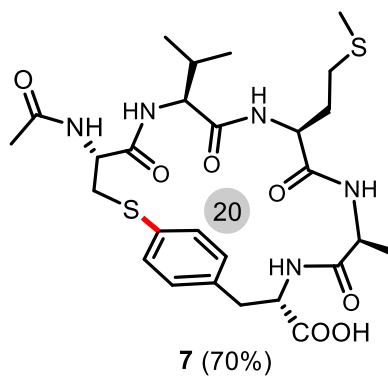

Compound **7** was isolated in 70% yield (42 mg) as a white powder under the general condition A.

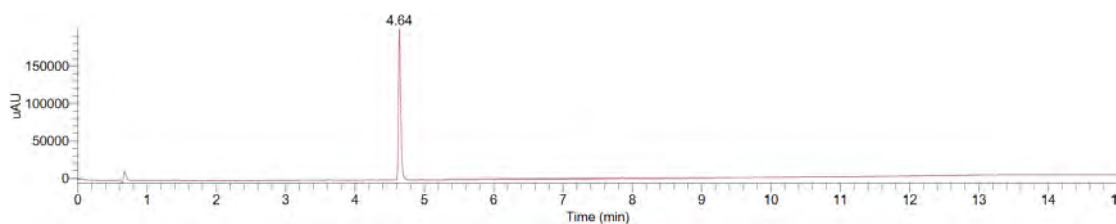

$t_R = 4.64$  min, 5% to 95% B for 10 min, then 95% B 10-15 min,  $\lambda = 254$  nm

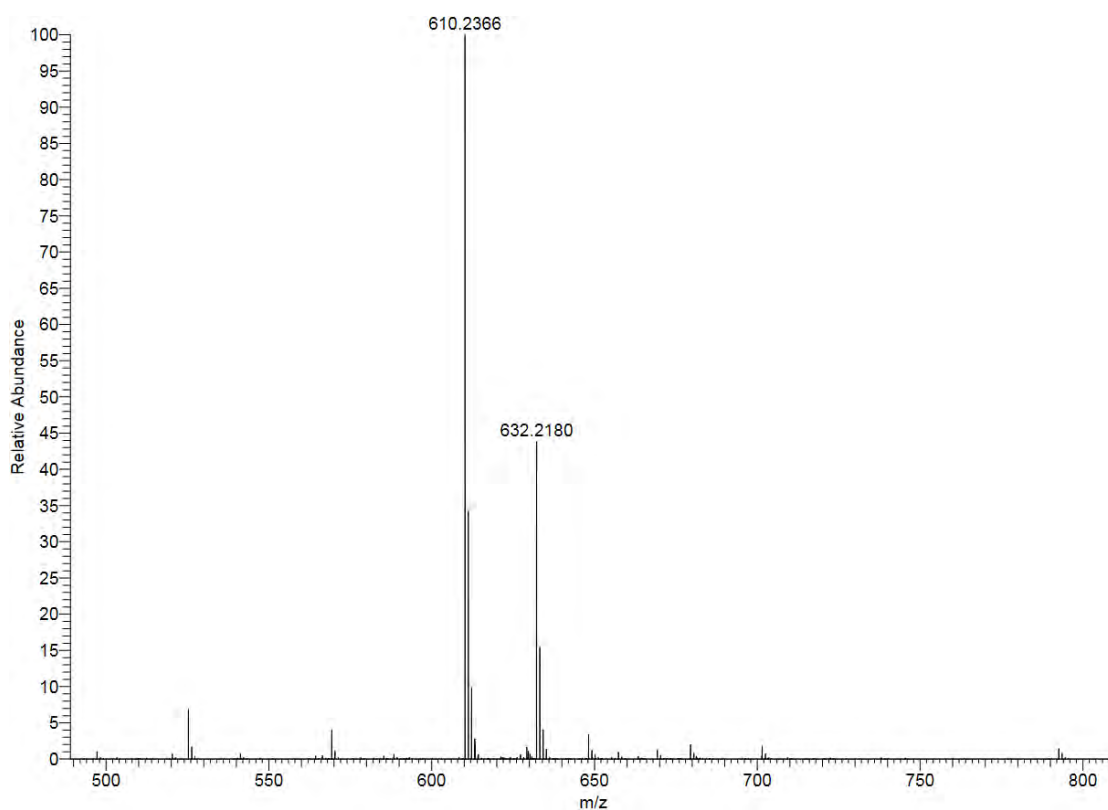

**HRMS:** Calcd for  $C_{27}H_{39}N_5O_7S_2$   $[M+H]^+$ : 610.2366; found: 610.2364.

**$^1H$  NMR (400 MHz, MeOD)**  $\delta$  7.39 (d,  $J = 8.2$  Hz, 2H), 7.20 (d,  $J = 8.2$  Hz, 2H), 4.70-4.54 (m, 2H), 4.41-4.28 (m, 2H), 4.10-3.98 (m, 1H), 3.33 (d,  $J = 8.8$  Hz, 2H), 3.31 (q,  $J = 1.8$  Hz, 2H), 2.83-2.68 (m, 1H), 2.50-2.37 (m, 2H), 2.36-2.25 (m, 1H), 2.06 (d,  $J = 1.6$  Hz, 3H), 2.01 (s, 3H), 1.83-1.68 (m, 1H), 1.30 (dd,  $J = 7.4, 2.6$  Hz, 3H), 0.93 (dd,  $J = 15.8, 6.8$  Hz, 6H).

**$^{13}C$  NMR (101 MHz, MeOD)**  $\delta$  174.85, 173.51, 172.80, 171.60, 137.81, 134.82, 132.92, 131.18, 60.20, 55.04, 54.71, 52.99, 39.53, 37.89, 33.73, 30.74, 30.46, 22.33, 19.84, 17.67, 17.27, 15.33.

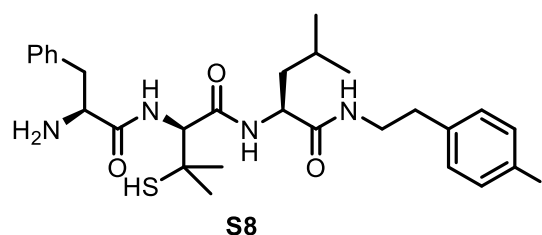

Compound **S8** was prepared in 70% yield as follows:

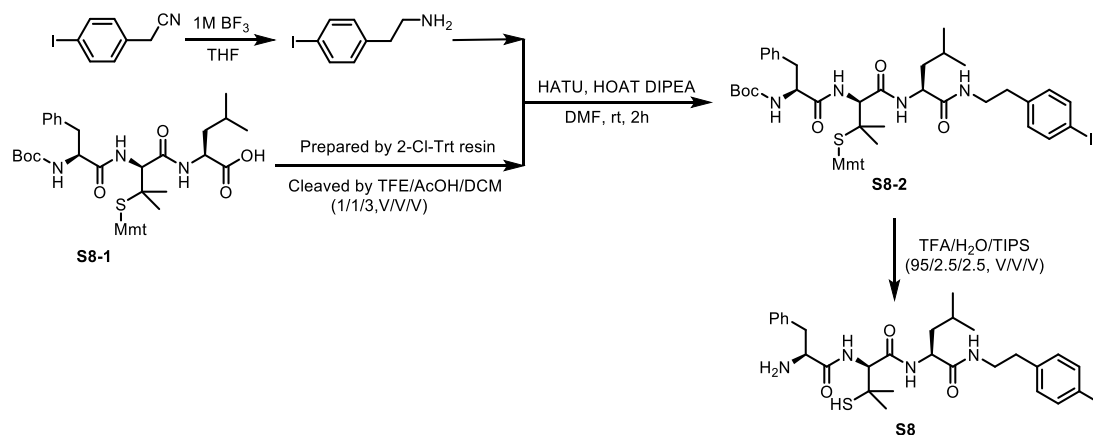

To a solution of 3-iodophenylacetonitrile (1 g, 4.12 mmol) in dry THF (6 mL) at 0 °C was added dropwise a solution of  $\text{BH}_3$  (10 mL of 1M solution in THF, 10 mmol) and was refluxed for 2h. EtOH (4 mL) was added to the mixture under ice-cooling and 1N HCl- $\text{CH}_3\text{OH}$  (6 mL) was added. The mixture was evaporated to give 3-iodophenylethylamine (1.2 g, quantitative), which was used in the next step without purification. S8-1 was prepared by 2-Cl-Trt resin and cleaved by TFE/AcOH/DCM (1/1/3, V/V/V). 3-iodophenylethylamine was couple with S8-1, following the general amide coupling procedure to give compound **S8** as yellow solid in 70% yield.

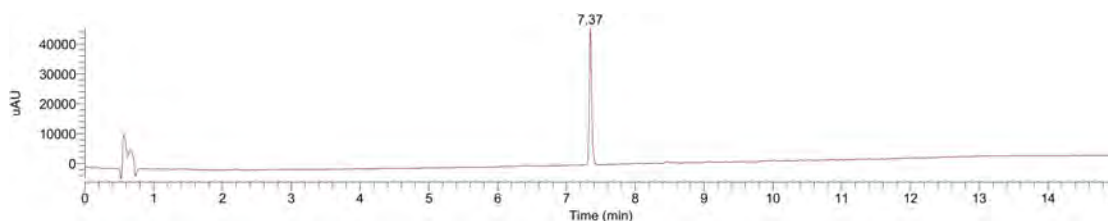

$t_R = 7.37$  min, 5% to 95% B for 10 min, then 95% B 10-15 min,  $\lambda = 254$  nm

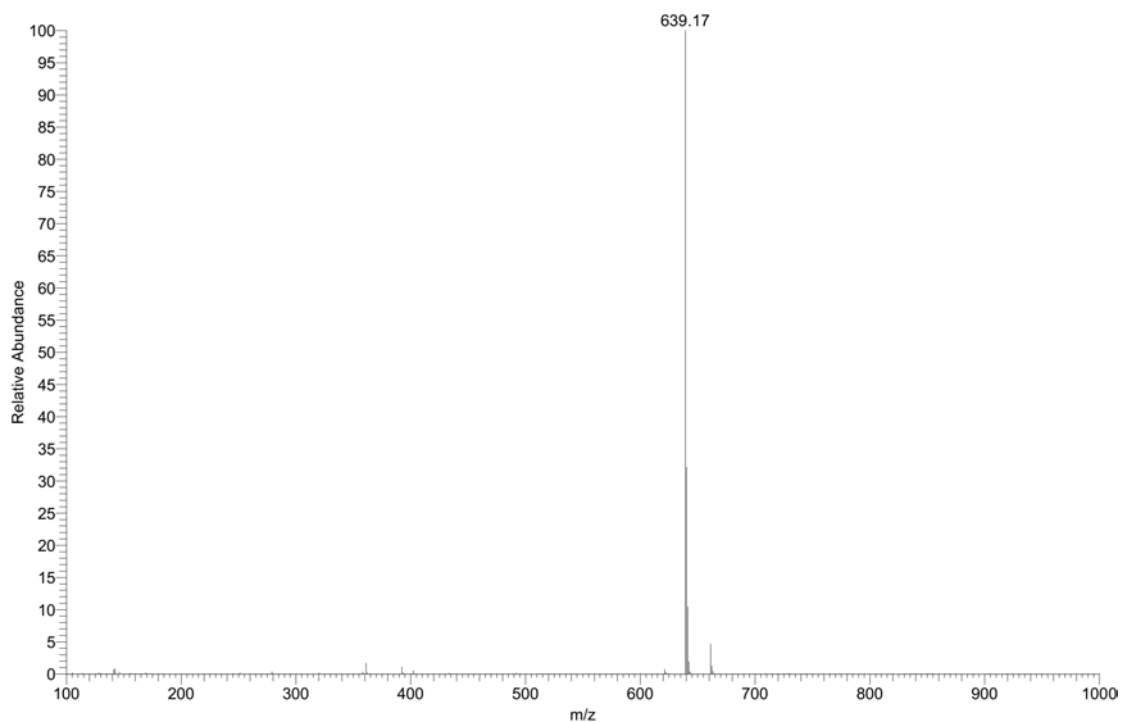

**LRMS:**  $[M+H]^+$  639.17.

**$^1\text{H}$  NMR (400 MHz, DMSO)**  $\delta$  7.60 (d,  $J = 8.17$  Hz, 2H), 7.30-7.10 (m, 5H), 7.00 (d,  $J = 8.17$  Hz, 2H), 4.45 (s, 1H), 4.27-4.13 (m, 1H), 3.65-3.53 (m, 1H), 3.39-3.18 (m, 4H), 2.99 (dd,  $J = 13.4, 5.0$  Hz, 1H), 2.67 (t,  $J = 7.2$  Hz, 2H), 2.59 (dd,  $J = 13.4, 8.6$  Hz, 1H), 1.57-1.45 (m, 1H), 1.35 (s, 3H), 1.24 (s, 3H), 0.81 (dd,  $J = 17.8, 6.4$  Hz, 6H).

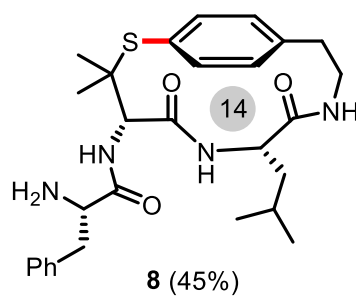

Compound **8** was isolated in 45% yield (22 mg) as a white powder (TFA salt) under the general condition A (16 h).

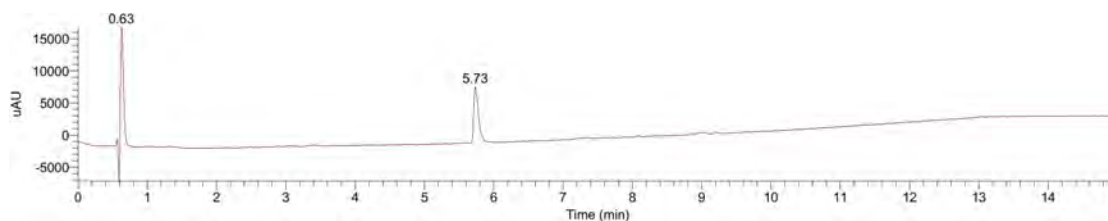

$t_R = 5.73$  min, 5% to 95% B for 10 min, then 95% B 10-15 min,  $\lambda = 254$  nm

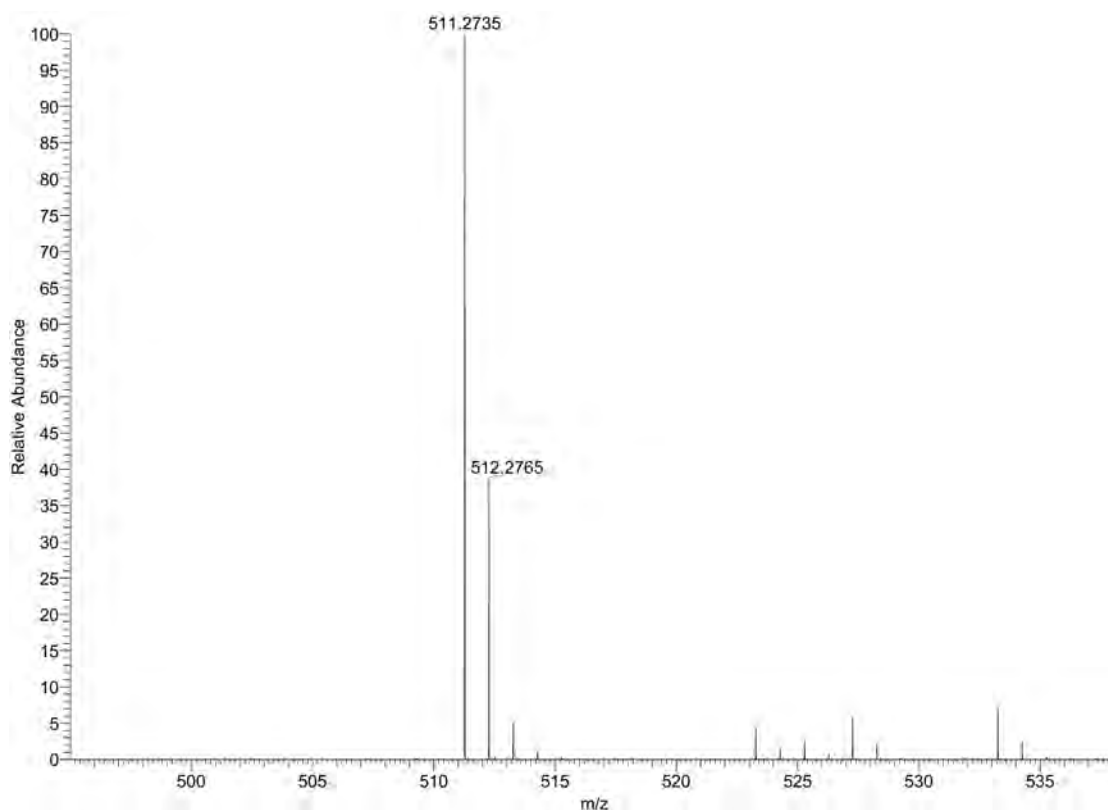

**HRMS:** Calcd for  $C_{28}H_{38}N_4O_3S$  [ $M+H^+$ ]: 511.2737; found: 511.2735

**$^1H$  NMR (400 MHz, MeOD)**  $\delta$  7.48-7.41 (m, 2H), 7.38 (s, 1H), 7.36 (d,  $J = 2.4$  Hz, 2H), 7.34 (s, 1H), 7.30 (d,  $J = 6.6$  Hz, 1H), 7.21-7.17 (m, 1H), 7.05 (dd,  $J = 7.8, 2.0$  Hz, 1H), 4.25-4.19 (m, 1H), 3.95 (t,  $J = 7.4$  Hz, 2H), 3.25-3.14 (m, 2H), 3.12-3.03 (m, 2H), 2.92 (dd,  $J = 13.6, 8.4$  Hz, 2H), 2.75-2.62 (m, 2H), 1.24-1.21 (m, 1H), 1.09 (s, 3H), 0.92 (s, 3H), 0.85 (dd,  $J = 9.8, 6.6$  Hz, 6H).

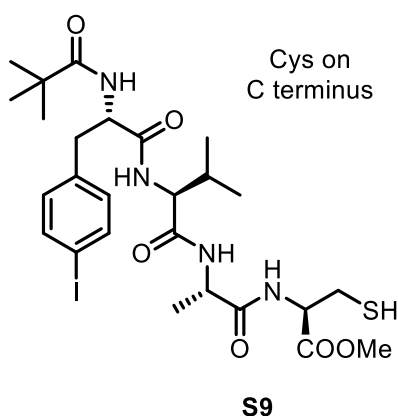

Compound **S9** was prepared as a white solid in 89% yield from 2-Cl-Trt resin following the SPPS procedure.

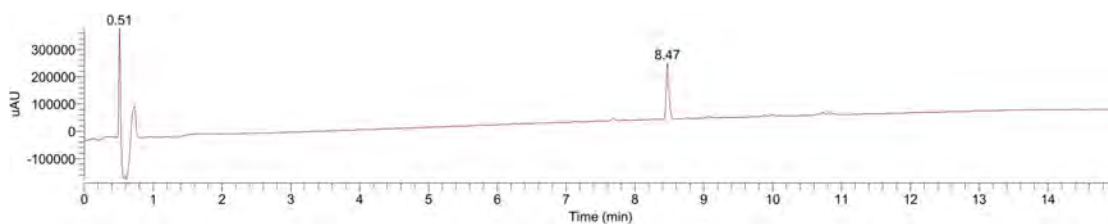

$t_R = 8.47$  min, 5% to 95% B for 10 min, then 95% B 10-15 min,  $\lambda = 254$  nm

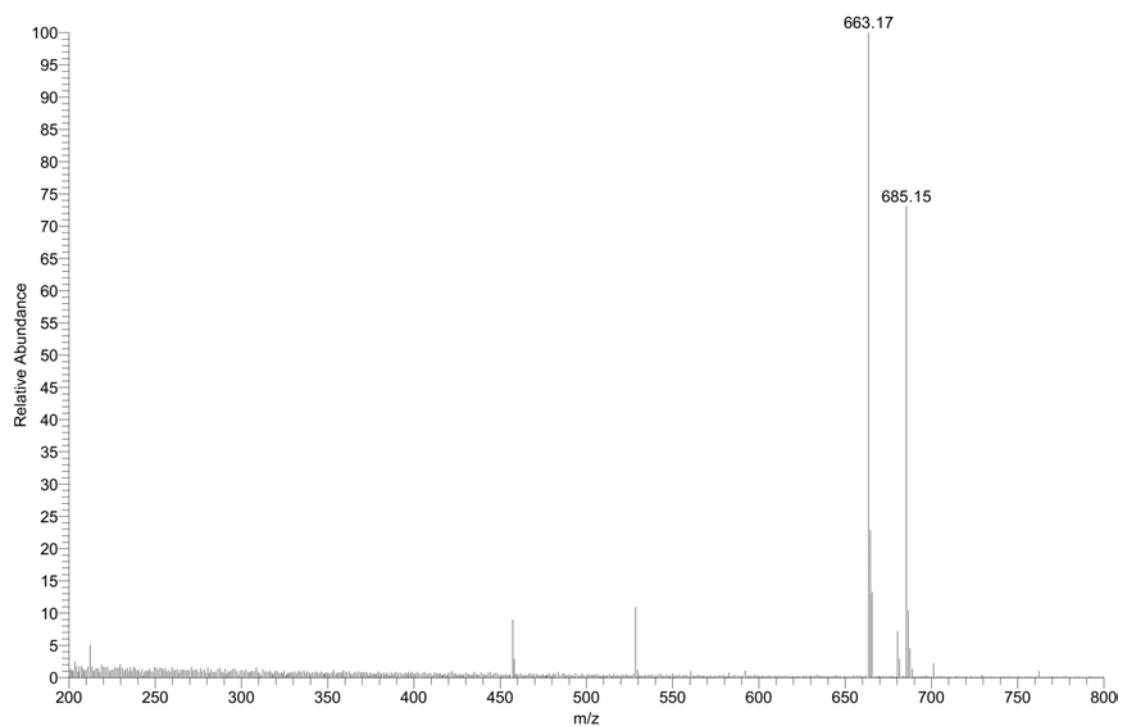

**LRMS:**  $[M+H]^+$  663.17;  $[M+Na]^+$  685.15.

**$^1H$  NMR (400 MHz, MeOD)**  $\delta$  7.60 (d,  $J = 8.3$  Hz, 2H), 7.00 (d,  $J = 8.2$  Hz, 2H), 4.68 (dd,  $J = 9.2, 5.0$  Hz, 1H), 4.65 (dd,  $J = 6.2, 4.6$  Hz, 1H), 4.41 (q,  $J = 7.0$  Hz, 1H), 4.19 (d,  $J = 7.0$  Hz, 1H), 3.74 (s, 3H), 3.17-3.09 (m, 1H), 2.97-2.84 (m, 3H), 2.14-2.01 (m, 1H), 1.39 (d,  $J = 7.0$  Hz, 3H), 1.08 (s, 9H), 0.95 (dd,  $J = 10.8, 6.6$  Hz, 6H).

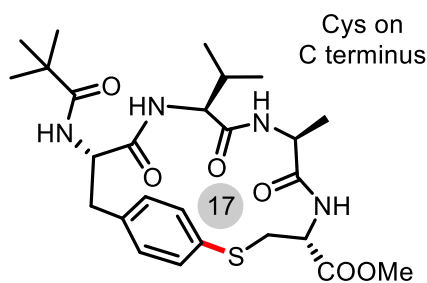

**9** (45%)

Compound **9** was isolated in 45% yield (24 mg) as a white powder under the general

condition A.

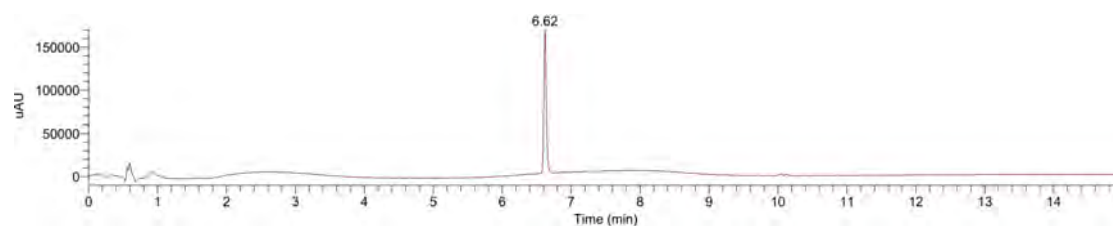

$t_R = 6.62$  min, 5% to 95% B for 10 min, then 95% B 10-15 min,  $\lambda = 254$  nm

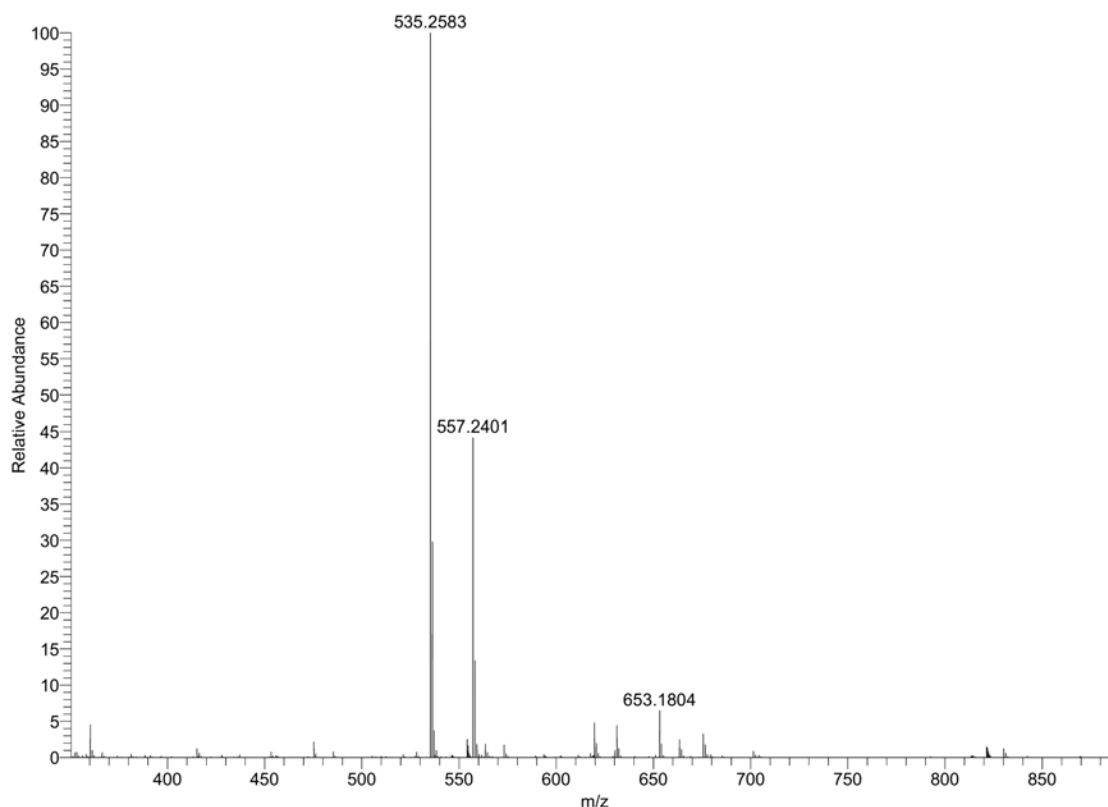

**HRMS:** Calcd for  $C_{26}H_{38}N_4O_6S$   $[M+H]^+$ : 535.2585; found: 535.2583

**$^1H$  NMR (400 MHz,  $CD_3Cl$ )**  $\delta$  7.33 (d,  $J = 8.2$  Hz, 2H), 7.17 (d,  $J = 8.2$  Hz, 2H), 6.63 (d,  $J = 7.8$  Hz, 1H), 6.57 (s, 1H), 6.23 (d,  $J = 8.0$  Hz, 1H), 5.97 (d,  $J = 6.0$  Hz, 1H), 4.78-4.72 (m, 1H), 4.59-4.51 (m, 1H), 4.22 (q,  $J = 6.2$  Hz, 1H), 4.16-4.10 (m, 1H), 3.84 (s, 3H), 3.76 (dd,  $J = 15.0, 4.4$  Hz, 1H), 3.52-3.48 (m, 1H), 3.16 (t,  $J = 12.2$  Hz, 1H), 2.83 (dd,  $J = 12.2, 3.6$  Hz, 1H), 2.16-1.94 (m, 2H), 1.34 (d,  $J = 6.6$  Hz, 3H), 1.22 (s, 9H), 0.88 (s, 6H).

**$^{13}C$  NMR (101 MHz, DMSO)**  $\delta$  177.54, 171.85, 171.01, 170.87, 170.55, 136.77, 133.97, 131.81, 130.35, 130.12, 59.95, 55.15, 54.11, 52.90, 48.79, 38.47, 31.74, 30.58, 27.70, 27.02, 22.54, 19.43, 18.76.

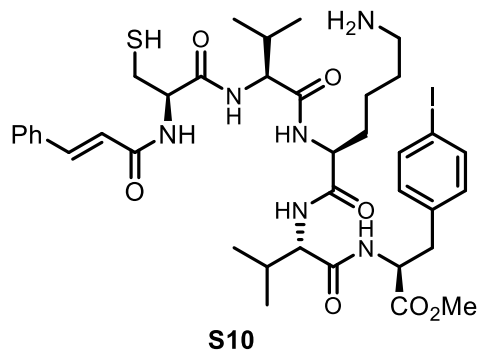

Compound **S10** was prepared as a white solid in 92% yield from 2-Cl-Trt resin following the SPPS procedure.

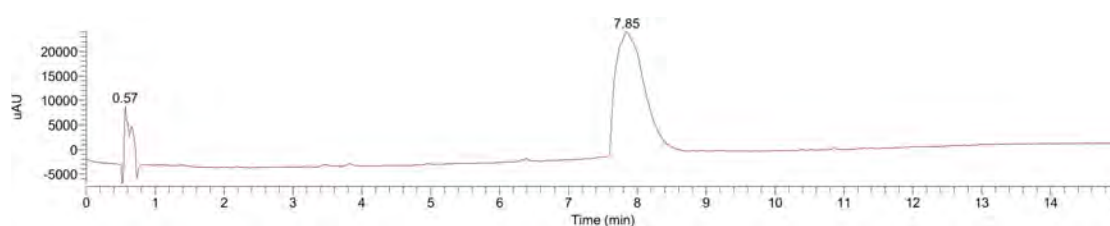

$t_R = 7.85$  min, 5% to 95% B for 10 min, then 95% B 10-15 min,  $\lambda = 254$  nm

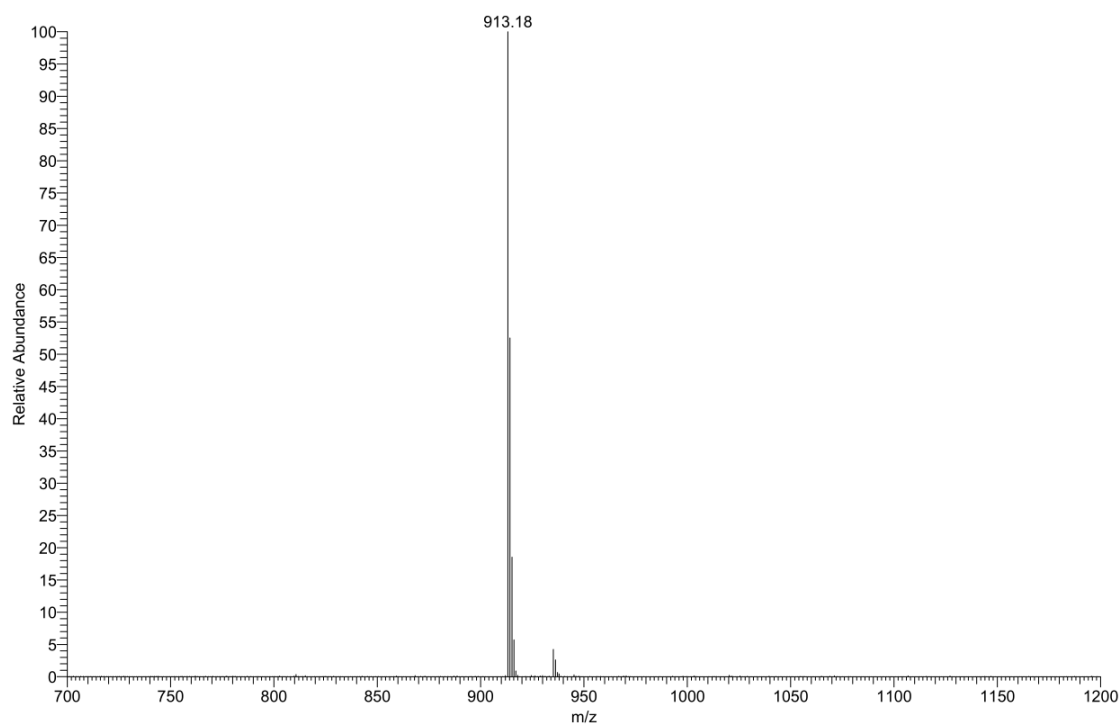

**LRMS:**  $[M+H]^+$  913.18.

**$^1H$  NMR (400 MHz, DMSO)**  $\delta$  8.48 (dd,  $J = 20.2, 7.8$  Hz, 2H), 8.26 (d,  $J = 7.8$  Hz, 1H), 8.13 (d,  $J = 7.8$  Hz, 1H), 7.85 (d,  $J = 5.2$  Hz, 2H), 7.60 (d,  $J = 7.8$  Hz, 3H), 7.55 (d,  $J = 7.0$  Hz, 2H), 7.47 (d,  $J = 15.6$  Hz, 1H), 7.39 (d,  $J = 6.4$  Hz, 3H), 7.24-7.09 (m,



5H), 7.03 (d,  $J = 7.8$  Hz, 2H), 6.71 (d,  $J = 15.6$  Hz, 1H), 4.80-4.67 (m, 1H), 4.65-4.54 (m, 1H), 4.51-4.43 (m, 1H), 4.33 (q,  $J = 7.6$  Hz, 1H), 4.21 (t,  $J = 7.8$  Hz, 1H), 3.58 (s, 3H), 3.10-3.02 (m, 2H), 3.02-2.96 (m, 1H), 2.92-2.82 (m, 3H), 2.76 (q,  $J = 8.2, 7.2$  Hz, 2H), 1.93 (q,  $J = 6.6$  Hz, 1H), 1.69-1.60 (m, 1H), 1.55 (t,  $J = 7.6$  Hz, 3H), 1.38-1.23 (m, 2H), 0.82 (dd,  $J = 6.6, 4.2$  Hz, 6H).

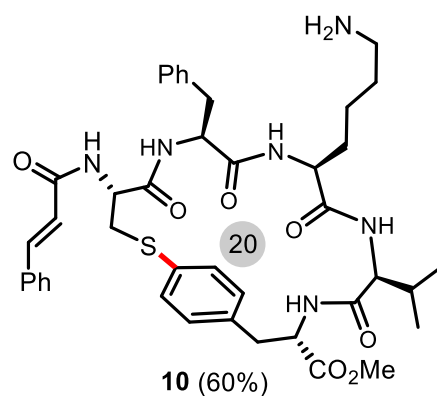

Compound **10** was isolated in 60% yield (47 mg) as a white powder (TFA salt) under the general condition A.

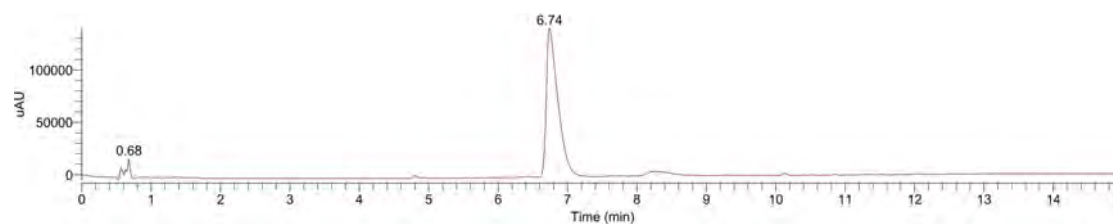

$t_R = 6.74$  min, 5% to 95% B for 10 min, then 95% B 10-15 min,  $\lambda = 254$  nm

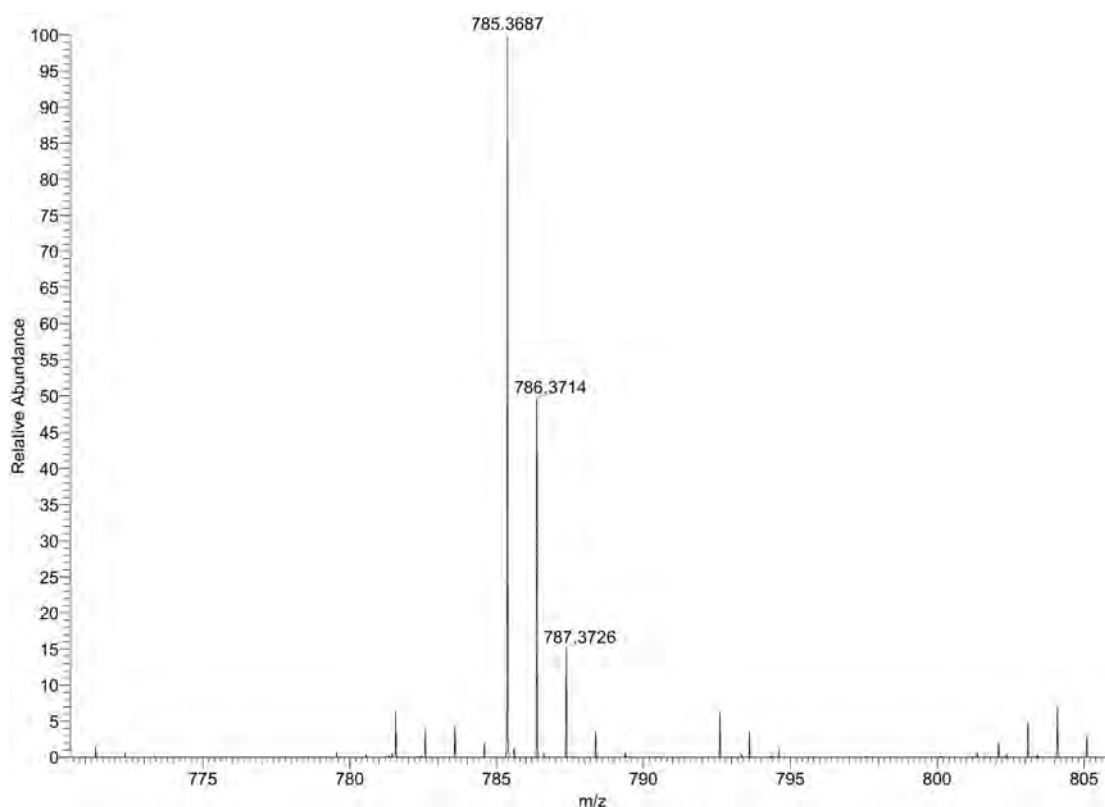

**HRMS:** Calcd for  $C_{42}H_{52}N_6O_7S$   $[M+H^+]$ : 785.3691; found: 785.3687

**$^1H$  NMR (400 MHz, MeOD)**  $\delta$  7.53-7.48 (m, 2H), 7.44 (s, 1H), 7.32 (m, 5H), 7.15-7.10 (m, 4H), 7.07 (t,  $J = 7.4$  Hz, 2H), 6.95 (t,  $J = 7.2$  Hz, 1H), 6.47 (dd,  $J = 15.8, 3.2$  Hz, 1H), 4.64 (dd,  $J = 10.0, 4.4$  Hz, 1H), 4.59 (dd,  $J = 6.4, 2.8$  Hz, 1H), 4.50 (dd,  $J = 12.4, 3.0$  Hz, 1H), 4.22 (dd,  $J = 7.4, 4.2$  Hz, 1H), 3.82 (d,  $J = 8.8$  Hz, 1H), 3.66 (s, 3H), 3.30 (dd,  $J = 13.2, 9.0$  Hz, 1H), 3.19-3.16 (m, 1H), 3.16-3.08 (m, 2H), 2.84-2.75 (m, 1H), 2.73-2.62 (m, 3H), 1.90-1.80 (m, 1H), 1.58-1.49 (m, 1H), 1.45-1.34 (m, 2H), 1.12-1.04 (m, 1H), 0.89 (t,  $J = 6.6$  Hz, 6H), 0.82-0.75 (m, 3H).

**$^{13}C$  NMR (101 MHz, MeOD)**  $\delta$  171.69, 171.18, 166.70, 141.38, 137.30, 135.79, 134.76, 133.61, 130.02, 129.71, 128.90, 128.67, 128.14, 127.55, 126.16, 59.68, 54.45, 53.81, 51.46, 38.95, 36.26, 35.45, 31.28, 29.61, 26.62, 18.16.

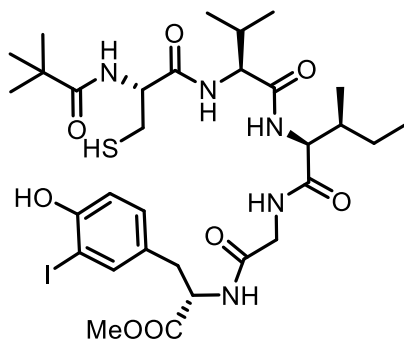

**S11**

Compound **S11** was prepared as a white solid in 94% yield from 2-Cl-Trt resin following the SPPS procedure.

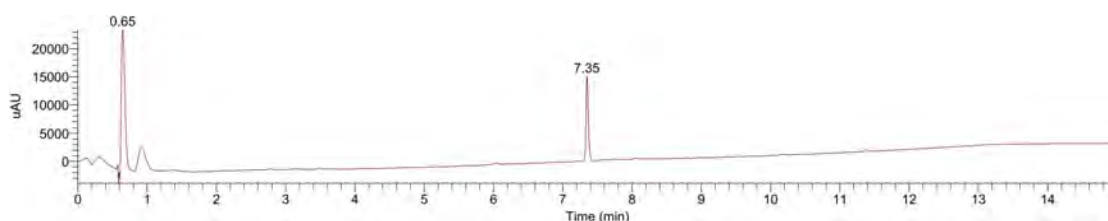

$t_R = 7.35$  min, 5% to 95% B for 10 min, then 95% B 10-15 min,  $\lambda = 254$  nm

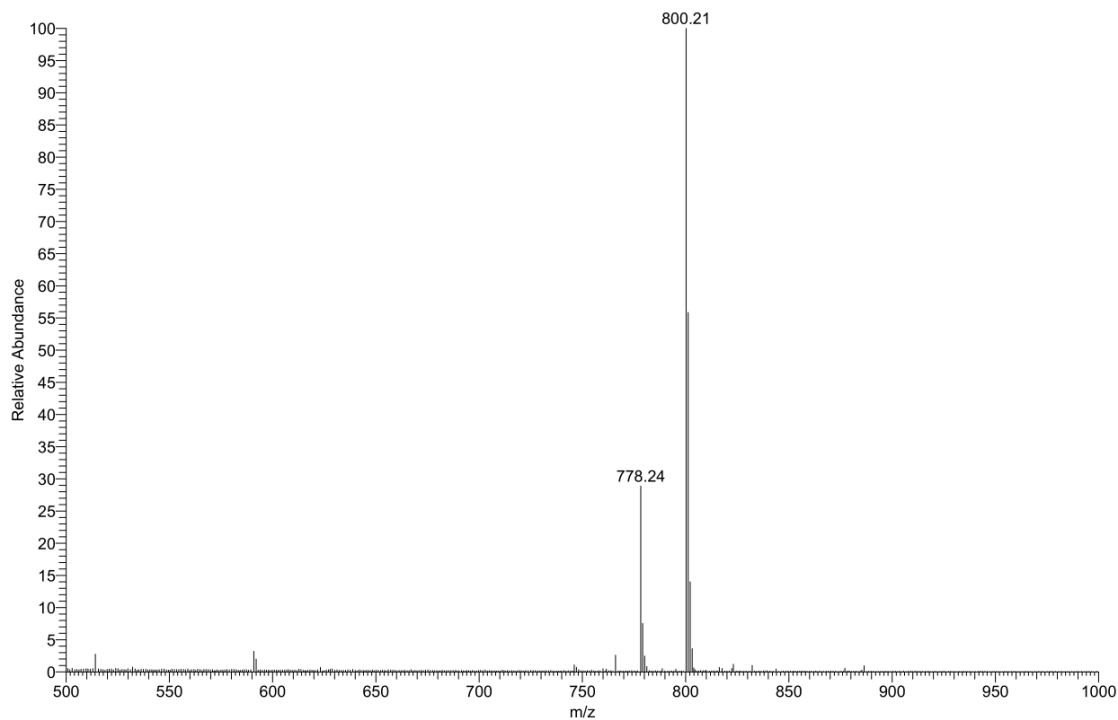

**LRMS:**  $[M+H]^+ 778.24$ ;  $[M+Na]^+ 800.21$ .

**$^1H$  NMR (400 MHz, MeOD)**  $\delta$  7.54 (d,  $J = 3.2$  Hz, 1H), 7.05 (dd,  $J = 8.2, 2.2$  Hz, 1H), 6.77 (d,  $J = 8.2$  Hz, 1H), 4.67-4.52 (m, 2H), 4.29-4.16 (m, 2H), 3.97-3.80 (m, 2H), 3.70 (s, 3H), 3.05 (dd,  $J = 14.4, 6.4$  Hz, 1H), 2.98-2.88 (m, 2H), 2.85 (dd,  $J = 13.8, 7.0$  Hz,

1H), 2.17-1.98 (m, 1H), 1.87 (d,  $J = 11.0$  Hz, 1H), 1.69-1.51 (m, 1H), 1.24 (s, 9H), 0.99-0.83 (m, 12H).

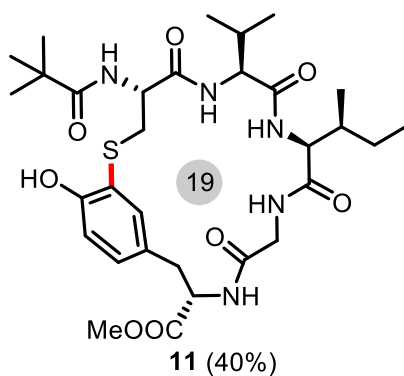

Compound **11** was isolated in 40% yield (26 mg) as a white powder under the general condition A.

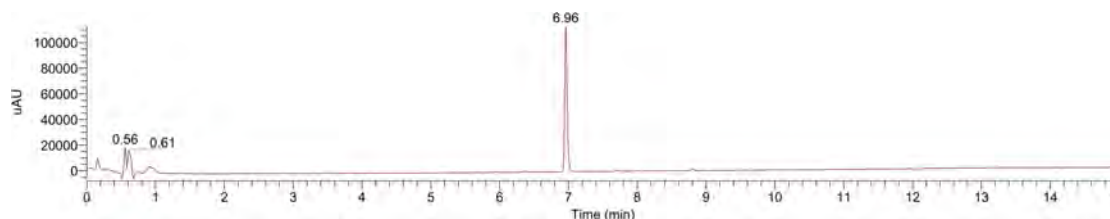

$t_R = 6.96$  min, 5% to 95% B for 10 min, then 95% B 10-15 min,  $\lambda = 254$  nm

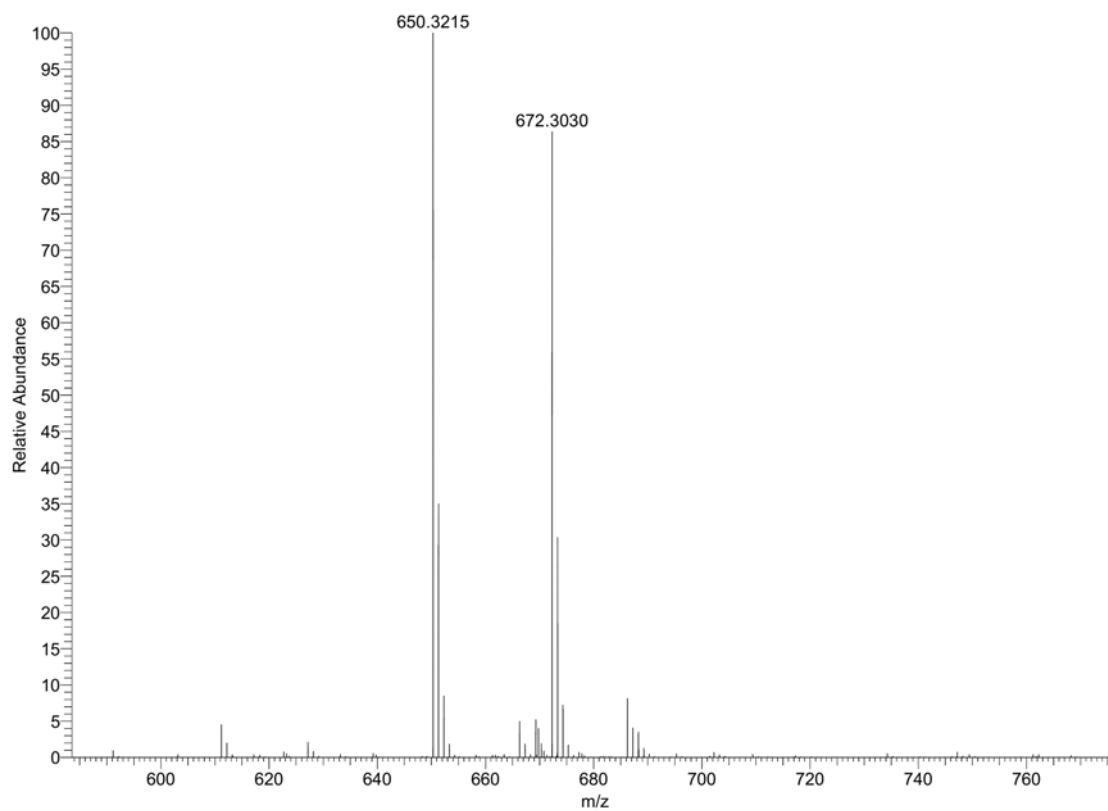

**HRMS:** Calcd for C<sub>31</sub>H<sub>47</sub>N<sub>5</sub>O<sub>8</sub>S [M+H<sup>+</sup>]: 650.3218; found: 650.3215

**<sup>1</sup>H NMR (400 MHz, MeOD)** δ 7.28 (s, 1H), 6.84 (d, *J* = 7.0 Hz, 1H), 6.64 (d, *J* = 8.2 Hz, 1H), 4.60 (dd, *J* = 9.0, 3.0 Hz, 1H), 4.40 (dd, *J* = 9.0, 6.0 Hz, 1H), 4.20 (d, *J* = 6.2 Hz, 1H), 3.92 (d, *J* = 6.2 Hz, 1H), 3.76 (d, *J* = 16.2 Hz, 1H), 3.62 (s, 3H), 3.52 (d, *J* = 16.4 Hz, 1H), 3.14 (dd, *J* = 14.8, 7.6 Hz, 2H), 3.02 (dd, *J* = 14.0, 3.4 Hz, 1H), 2.82 (dd, *J* = 14.0, 9.2 Hz, 1H), 2.10-2.00 (m, 1H), 1.80 (d, *J* = 7.8 Hz, 1H), 1.45-1.36 (m, 1H), 1.10 (s, 9 H), 1.04-0.98 (m, 1H), 0.91 (dd, *J* = 6.8, 3.0 Hz, 6H), 0.85-0.77 (m, 6H).

**<sup>13</sup>C NMR (101 MHz, DMSO)** δ 178.03, 171.61, 171.50, 171.45, 171.01, 169.14, 153.23, 129.52, 128.70, 127.12, 123.68, 114.59, 60.68, 56.64, 54.10, 52.20, 52.03, 43.07, 38.55, 38.19, 36.20, 33.54, 29.88, 27.70, 24.63, 19.65, 18.83, 15.79, 11.69.

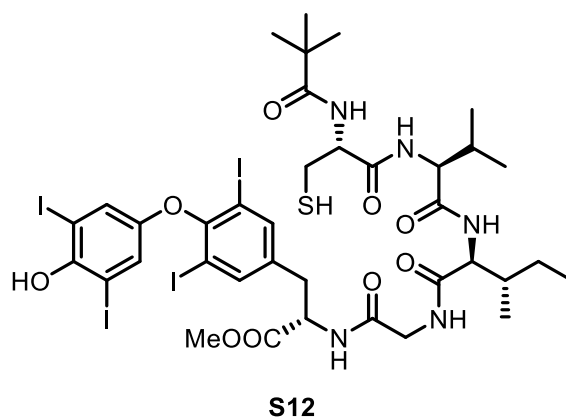

Compound **S12** was prepared as a yellow solid in 94% yield from 2-Cl-Trt resin following the SPPS procedure.

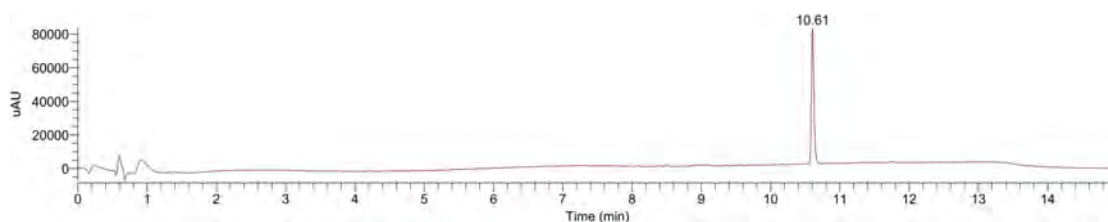

$t_R$  = 10.61 min, 5% to 95% B for 10 min, then 95% B 10-15 min,  $\lambda$  = 254 nm

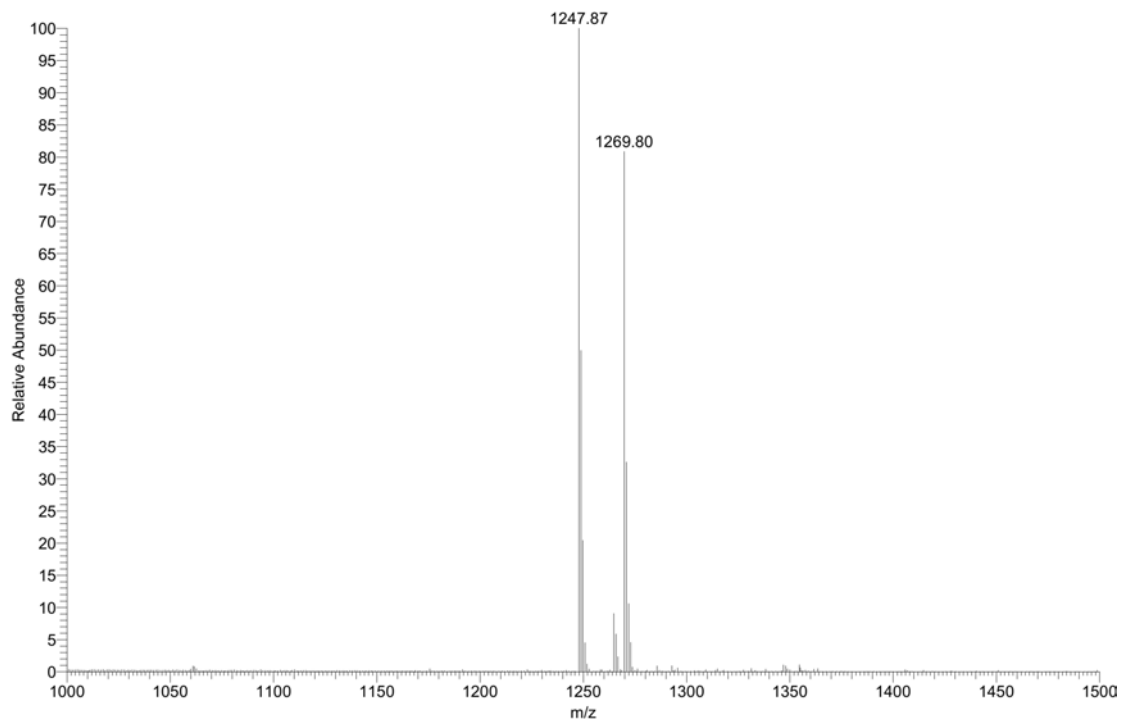

**LRMS:**  $[M+H]^+$  1247.87;  $[M+Na]^+$  1269.80.

**$^1\text{H}$  NMR (400 MHz, MeOD)**  $\delta$  7.82 (s, 2H), 7.09 (s, 2H), 4.61 (t,  $J = 7.0$  Hz, 1H), 4.55-4.45 (m, 1H), 4.22 (d,  $J = 6.6$  Hz, 1H), 4.18-4.11 (m, 1H), 3.81 (dd,  $J = 70.8, 16.8$  Hz, 2H), 3.65 (s, 3H), 3.16-2.94 (m, 2H), 2.94-2.75 (m, 2H), 2.11-1.98 (m, 1H), 1.86-1.74 (m, 1H), 1.66-1.43 (m, 2H), 1.17 (s, 9H), 0.94-0.84 (m, 12H).

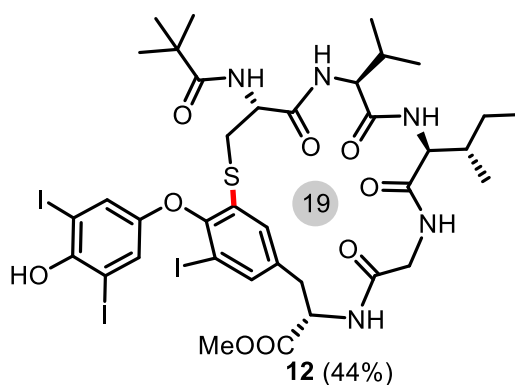

Compound **12** was isolated in 44% yield (49 mg) as a white powder under the general condition A. The reaction site of thyroxine can be judged by  $^1\text{H}$  NMR spectrum of **S12** and **12**.

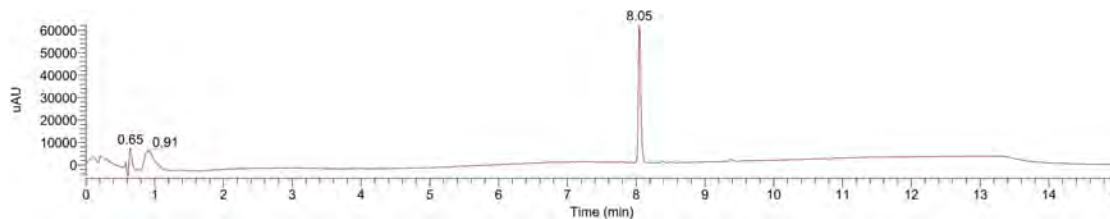

$t_R = 8.05$  min, 5% to 95% B for 10 min, then 95% B 10-15 min,  $\lambda = 254$  nm

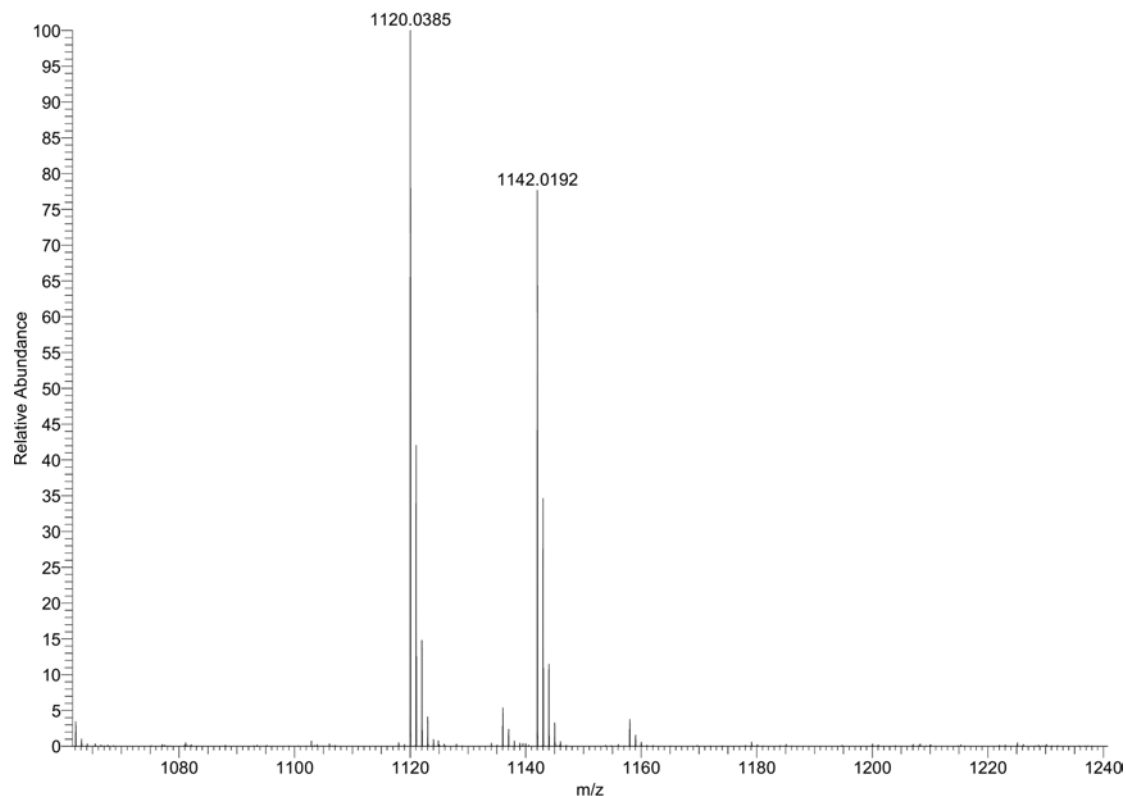

**HRMS:** Calcd for  $C_{37}H_{48}I_3N_5O_9S$   $[M+H]^+$ : 1120.0380; found: 1120.0385

**$^1H$  NMR (400 MHz, MeOD)**  $\delta$  7.57 (d,  $J = 1.8$  Hz, 1H), 7.50 (d,  $J = 1.8$  Hz, 1H), 7.04 (s, 2H), 4.70 (dd,  $J = 11.0, 4.2$  Hz, 1H), 4.29 (d,  $J = 6.4$  Hz, 1H), 3.89 (d,  $J = 6.6$  Hz, 1H), 3.80 (d,  $J = 15.6$  Hz, 1H), 3.74 (s, 3H), 3.64 (d,  $J = 15.6$  Hz, 1H), 3.53 (dd,  $J = 12.0, 4.2$  Hz, 1H), 3.32 (d,  $J = 8.6$  Hz, 1H), 3.26 (d,  $J = 11.8$  Hz, 1H), 3.14 (dd,  $J = 13.8, 3.6$  Hz, 1H), 3.06 (dd,  $J = 13.8, 6.8$  Hz, 1H), 2.15-2.04 (m, 1H), 1.86-1.76 (m, 1H), 1.54-1.41 (m, 1H), 1.13 (dd,  $J = 6.6, 2.6$  Hz, 1H), 1.08 (s, 9H), 1.01 (dd,  $J = 6.9, 4.4$  Hz, 6H), 0.97 (d,  $J = 6.8$  Hz, 3H), 0.90 (t,  $J = 7.4$  Hz, 3H).

**$^{13}C$  NMR (101 MHz, DMSO)**  $\delta$  177.46, 171.11, 170.80, 170.68, 170.44, 168.88, 147.50, 137.51, 136.75, 135.76, 133.67, 129.62, 128.60, 128.19, 128.00, 127.88, 126.37, 124.92, 92.01, 87.47, 77.70, 62.83, 55.84, 53.23, 51.80, 50.61, 42.45, 29.32, 28.98, 28.78, 28.65, 28.53, 27.19, 26.51, 24.02, 19.20, 18.48, 15.38, 13.92, 11.33.

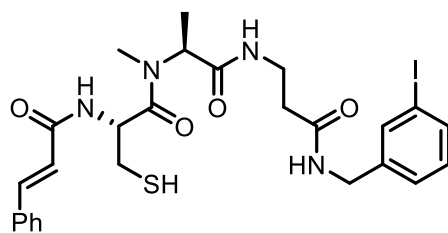

**S13**

Compound **S13** was prepared in 88% yield as follows:

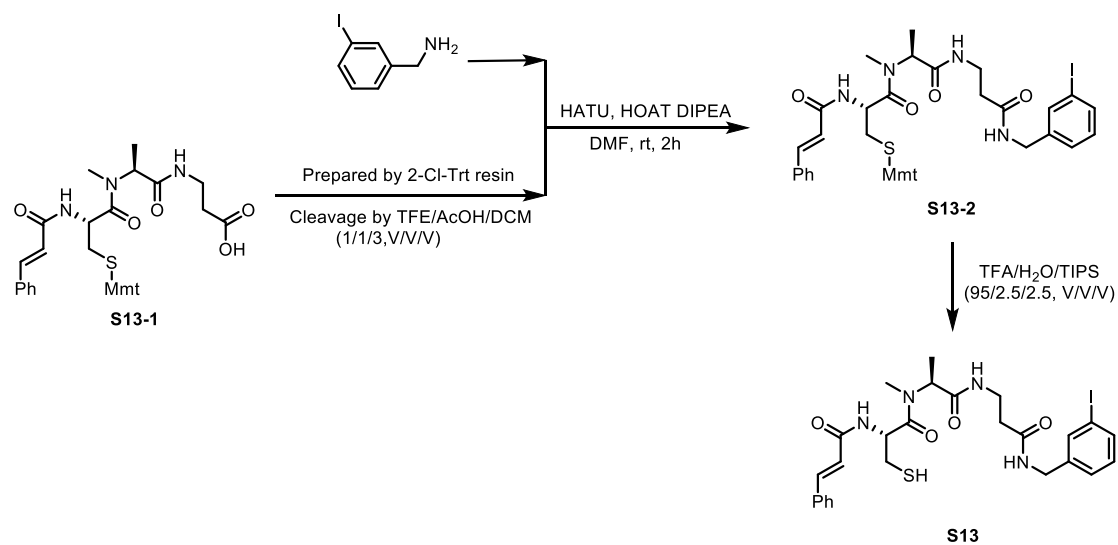

**Scheme S6**

S13-1 was prepared by 2-Cl-Trt resin and cleaved by TFE/AcOH/DCM (1/1/3, V/V/V). 3-iodobenzylamine was couple with S13-1, following the general amide coupling procedure to give compound **S13** as white solid in 88% yield.

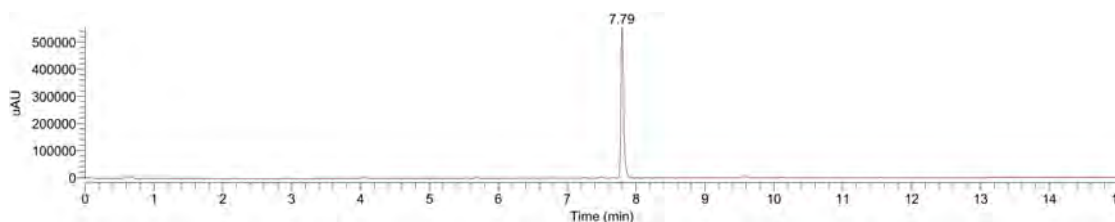

$t_R = 7.79$  min, 5% to 95% B for 10 min, then 95% B 10-15 min,  $\lambda = 254$  nm



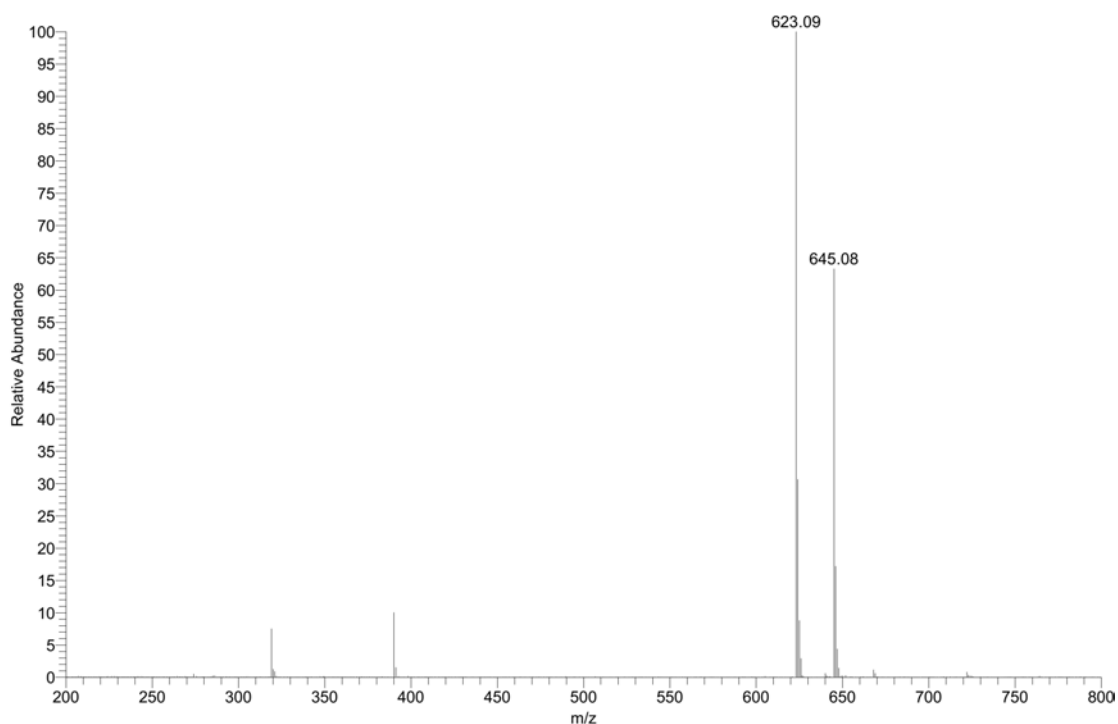

**LRMS:**  $[M+H]^+$  623.09;  $[M+Na]^+$  645.08.

**$^1H$  NMR (400 MHz, MeOD)**  $\delta$  7.67 (s, 1H), 7.64-7.68 (m, 4H), 7.39 (s, 3H), 7.32-7.18 (m, 1H), 7.15-7.00 (m, 1H), 6.65 (dd,  $J = 26.4, 15.8$  Hz, 1H), 5.09-4.99 (m, 1H), 4.98-4.89 (m, 1H), 4.29 (dd,  $J = 18.8, 3.0$  Hz, 2H), 3.57-3.38 (m, 2H), 3.11 (s, 2H), 3.02-2.88 (m, 1H), 2.87-2.73 (m, 2H), 2.54-2.38 (m, 2H), 1.51-1.31 (m, 3H).

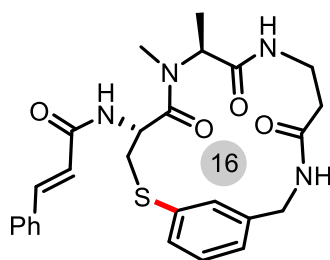

**13** (41%)

Compound **13** was isolated in 41% yield (20 mg) as a white powder under the general condition A.

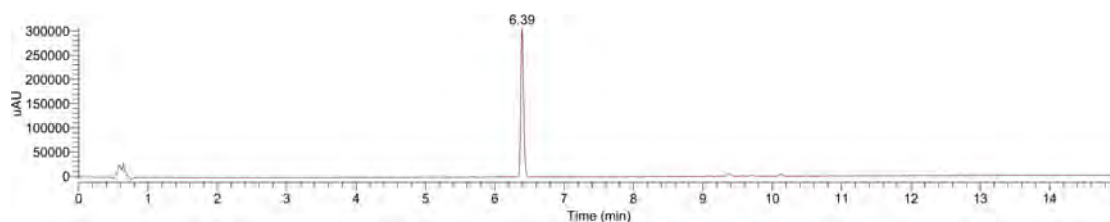

$t_R = 6.39$  min, 5% to 95% B for 10 min, then 95% B 10-15 min,  $\lambda = 254$  nm

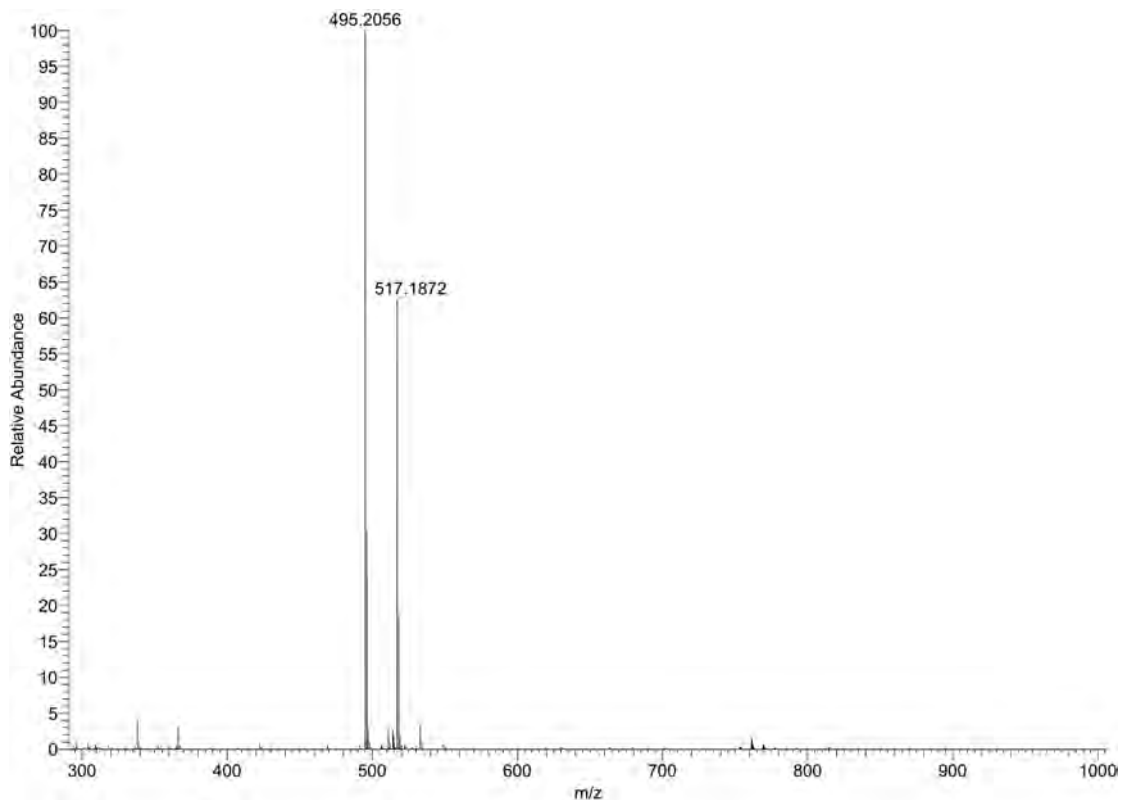

**HRMS:** Calcd for C<sub>26</sub>H<sub>30</sub>N<sub>4</sub>O<sub>4</sub>S [M+H<sup>+</sup>]: 495.2061; found: 495.2056

**<sup>1</sup>H NMR (400 MHz, MeOD)** δ 7.72-7.49 (m, 4H), 7.47-7.36 (m, 4H), 7.32 (t, *J* = 7.6 Hz, 1H), 7.21 (d, *J* = 7.4 Hz, 1H), 6.73 (d, *J* = 15.6 Hz, 1H), 5.03 (q, *J* = 6.8 Hz, 1H), 4.80 (d, *J* = 14.6 Hz, 1H), 4.72 (dd, *J* = 8.4, 5.0 Hz, 1H), 4.01 (d, *J* = 14.2 Hz, 1H), 3.81-3.72 (m, 1H), 3.37 (d, *J* = 5.2 Hz, 1H), 3.28-3.19 (m, 1H), 3.15 (dd, *J* = 14.6, 8.4 Hz, 1H), 3.09-2.84 (m, 1H), 2.59-2.46 (m, 1H), 2.41 (s, 3H), 1.13 (d, *J* = 6.8 Hz, 3H).

**<sup>13</sup>C NMR (101 MHz, DMSO)** δ 170.63, 170.30, 169.61, 164.81, 141.16, 139.65, 134.67, 129.60, 129.51, 128.94, 128.86, 128.17, 127.69, 127.56, 126.38, 121.21, 52.15, 48.26, 41.84, 35.49, 35.08, 34.70, 29.65, 12.99.

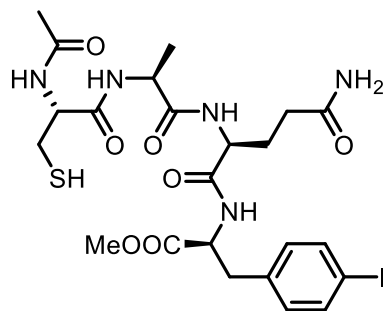

**S14**

Compound **S14** was prepared as a white solid in 86% yield from 2-Cl-Trt resin following the SPPS procedure.

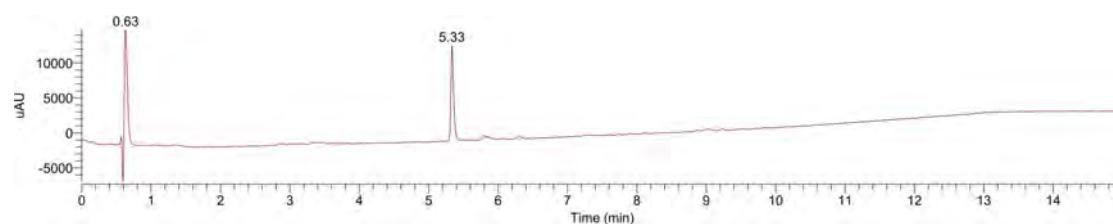

$t_R = 5.33$  min, 5% to 95% B for 10 min, then 95% B 10-15 min,  $\lambda = 254$  nm

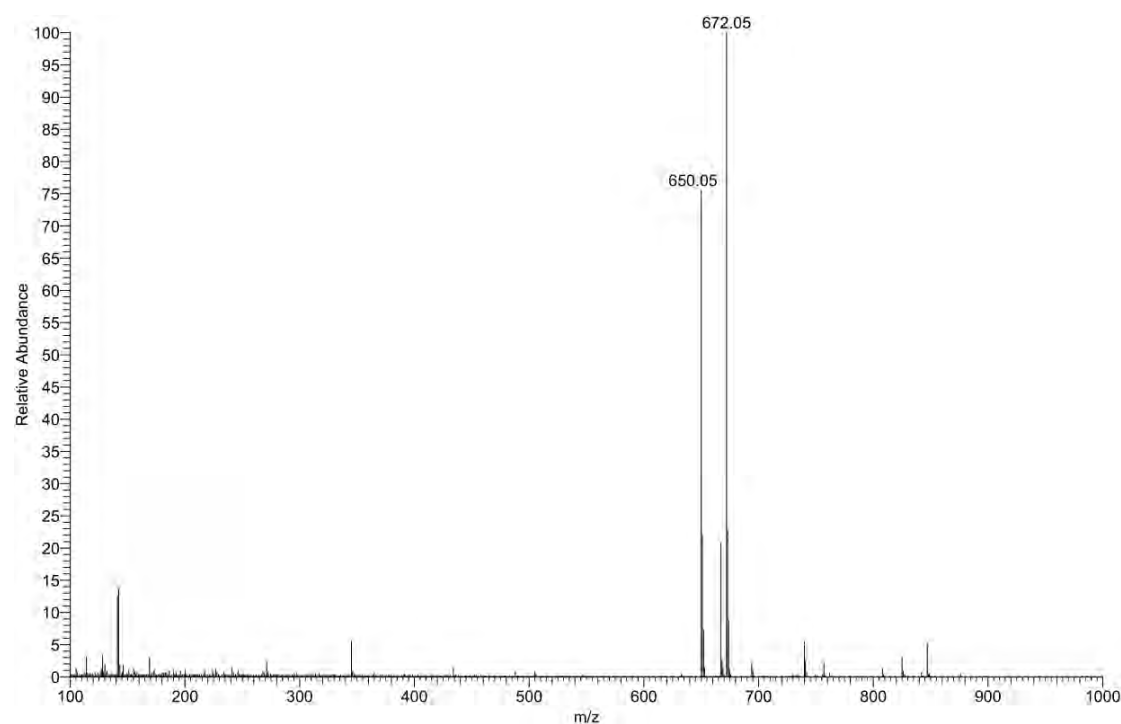

**LRMS:**  $[M+H]^+$  650.05;  $[M+Na]^+$  672.05.

**$^1H$  NMR (400 MHz, DMSO)**  $\delta$  8.34-8.27 (m, 1H), 8.14 (d,  $J = 7.0$  Hz, 1H), 8.08 (d,  $J = 7.8$  Hz, 1H), 7.89 (d,  $J = 8.4$  Hz, 1H), 7.61 (d,  $J = 7.8$  Hz, 2H), 7.20 (s, 1H), 7.02 (d,  $J = 8.0$  Hz, 2H), 6.75 (s, 1H), 4.50-4.41 (m, 1H), 4.41-4.32 (m, 1H), 4.31-4.17 (m, 2H), 3.59 (s, 3H), 3.01-2.86 (m, 2H), 2.79-2.61 (m, 2H), 2.11-2.03 (m, 2H), 1.87 (s, 3H), 1.85-1.78 (m, 1H), 1.75-1.63 (m, 1H), 1.20-1.11 (m, 3H).

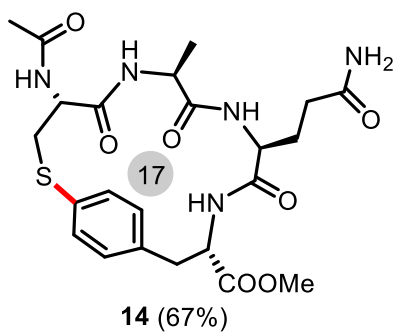

Compound **14** was isolated in 67% yield (34 mg) as a white powder under the general condition A.

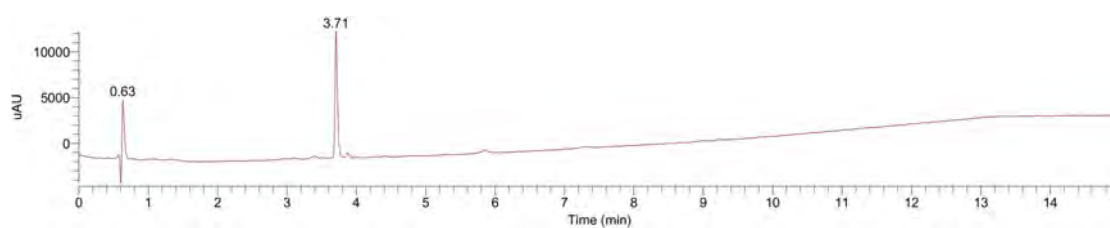

$t_R = 3.71$  min, 5% to 95% B for 10 min, then 95% B 10-15 min,  $\lambda = 254$  nm

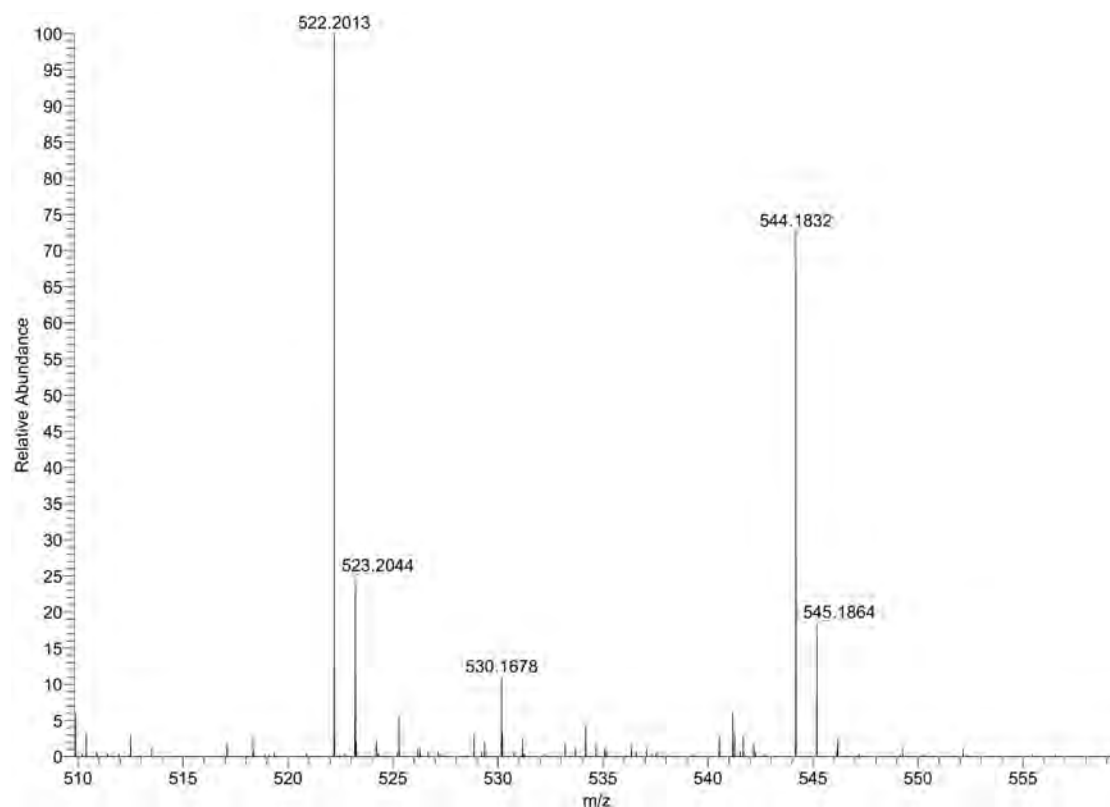

**HRMS:** Calcd for  $C_{23}H_{31}N_5O_7S$   $[M+H]^+$ : 522.2017; found: 522.2013

**$^1H$  NMR (400 MHz, DMSO)**  $\delta$  8.21 (dd,  $J = 8.2, 4.8$  Hz, 2H), 7.95 (d,  $J = 8.6$  Hz, 1H), 7.43 (d,  $J = 7.4$  Hz, 1H), 7.25 (s, 1H), 7.19 (d,  $J = 7.8$  Hz, 2H), 7.09 (d,  $J = 7.8$  Hz, 2H),

6.72 (s, 1H), 4.53 (t,  $J = 10.0$  Hz, 1H), 4.35-4.23 (m, 1H), 4.14 (t,  $J = 7.8$  Hz, 1H), 4.00 (q,  $J = 7.2, 6.8$  Hz, 1H), 3.70 (s, 3H), 3.48 (dd,  $J = 15.2, 4.6$  Hz, 1H), 3.17-3.10 (m, 1H), 2.87 (dd,  $J = 15.0, 4.4$  Hz, 1H), 2.68 (t,  $J = 13.0$  Hz, 1H), 1.97 (t,  $J = 7.4$  Hz, 2H), 1.88 (s, 3H), 1.80-1.67 (m, 2H), 1.16 (d,  $J = 7.2$  Hz, 3H).

$^{13}\text{C}$  NMR (101 MHz, DMSO)  $\delta$  174.14, 172.07, 171.63, 170.66, 169.52, 169.46, 136.42, 133.33, 131.33, 130.32, 54.04, 53.10, 53.00, 52.61, 50.02, 37.43, 36.56, 31.53, 27.50, 22.93, 19.31.

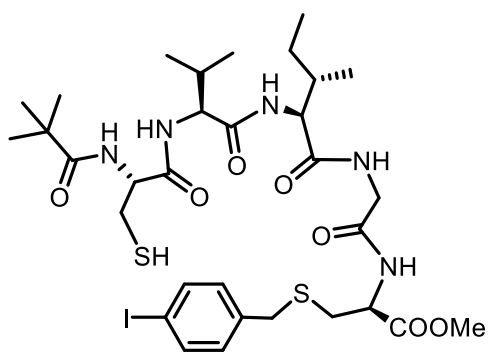

**S15**

Compound **S15** was prepared as a white solid in 87% yield from 2-Cl-Trt resin following the SPPS procedure.

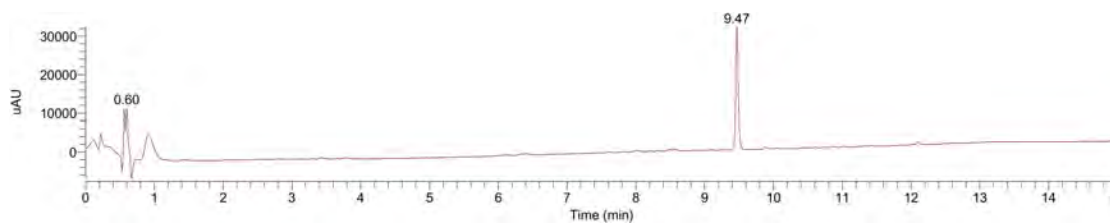

$t_R = 9.47$  min, 5% to 95% B for 10 min, then 95% B 10-15 min,  $\lambda = 254$  nm

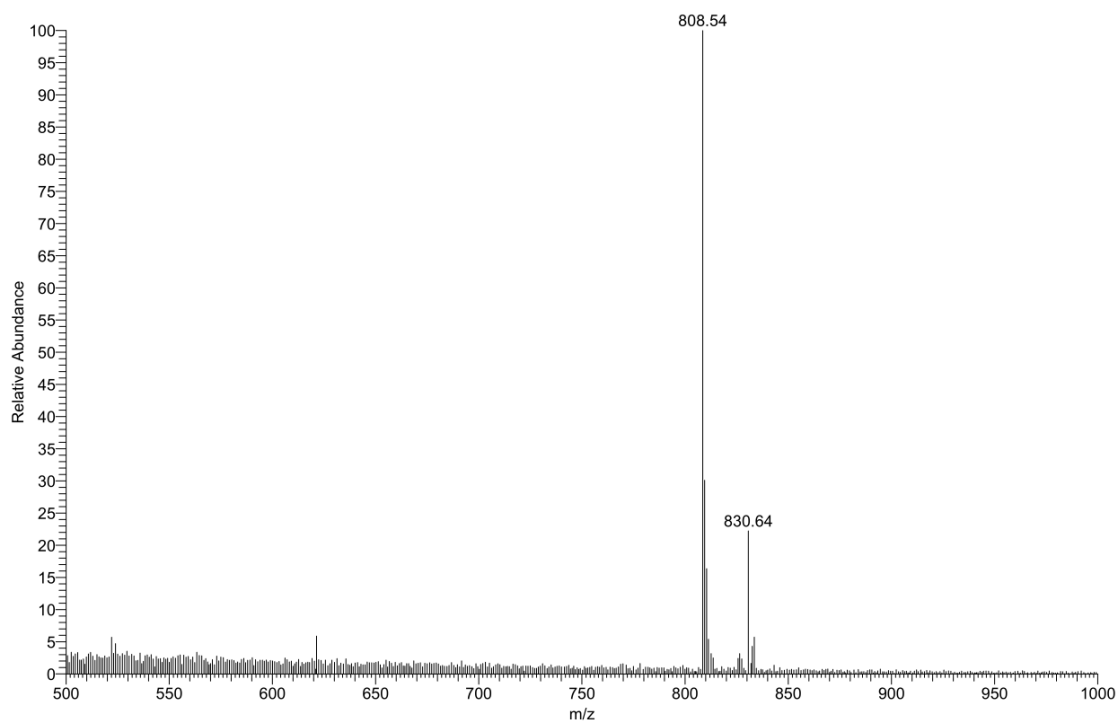

**LRMS:**  $[M+H]^+$  808.54;  $[M+Na]^+$  830.64.

**$^1\text{H}$  NMR (400 MHz, AcOD)**  $\delta$  7.74 (s, 1H), 7.64 (d,  $J = 7.8$  Hz, 1H), 7.36 (d,  $J = 7.6$  Hz, 1H), 7.11 (t,  $J = 7.8$  Hz, 1H), 4.86 (dd,  $J = 7.0, 5.2$  Hz, 1H), 4.78 (t,  $J = 6.6$  Hz, 1H), 4.54 (d,  $J = 8.2$  Hz, 1H), 4.43 (d,  $J = 7.4$  Hz, 1H), 4.16 (s, 2H), 3.78 (s, 3H), 3.72 (s, 2H), 3.01-2.89 (m, 2H), 2.88-2.78 (m, 2H), 2.12 (dd,  $J = 13.8, 7.0$  Hz, 2H), 1.94-1.83 (m, 1H), 1.66-1.50 (m, 1H), 1.24 (s, 9H), 0.99-0.87 (m, 12H).

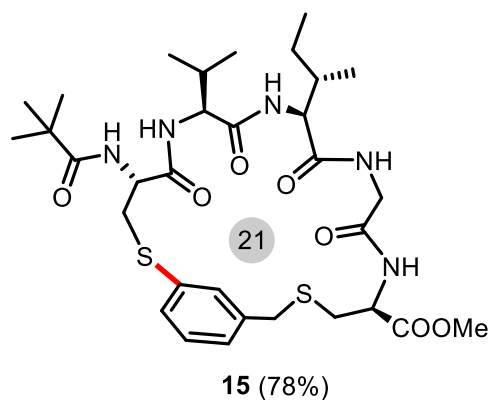

Compound **15** was isolated in 78% yield (53 mg) as a white powder under the general condition A.

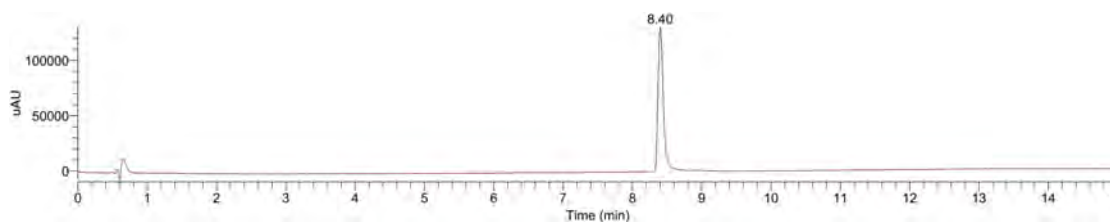

$t_R = 8.40$  min, 5% to 95% B for 10 min, then 95% B 10-15 min,  $\lambda = 254$  nm

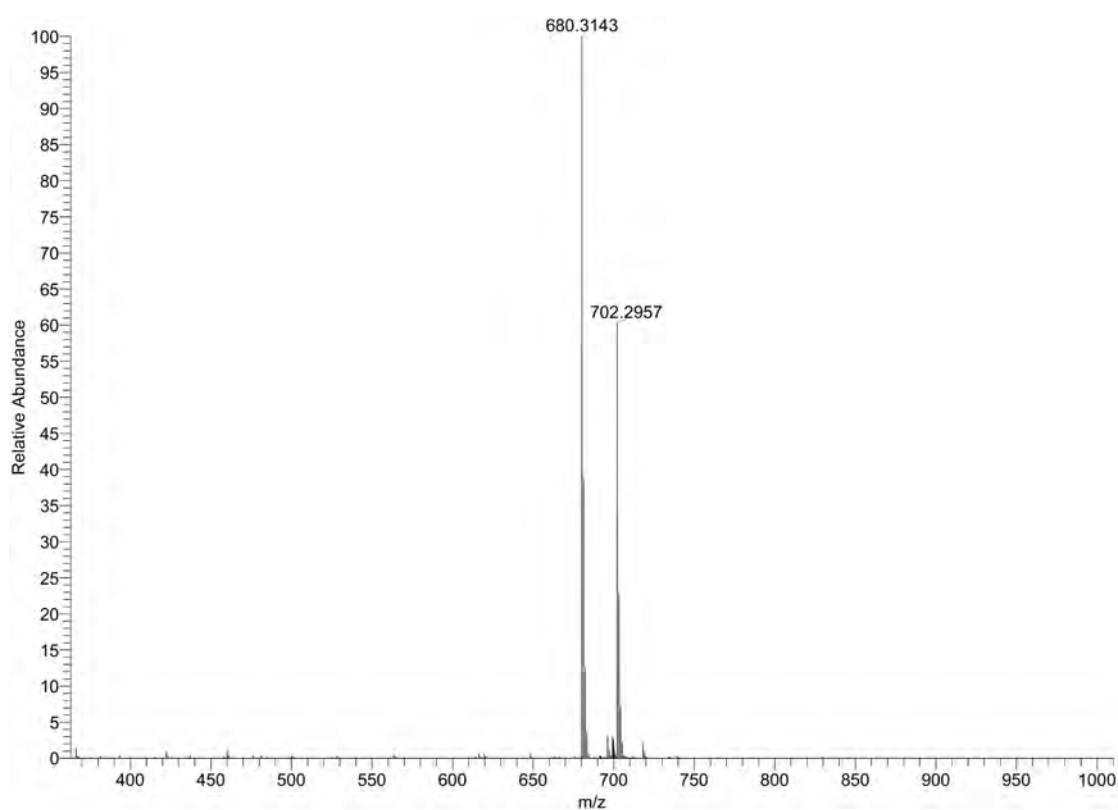

**HRMS:** Calcd for  $C_{32}H_{49}N_5O_7S_2$   $[M+H]^+$ : 680.3146; found: 680.3143

**$^1H$  NMR (400 MHz, AcOD)**  $\delta$  7.60 (s, 1H), 7.29-7.19 (m, 3H), 4.85-4.80 (m, 1H), 4.80-4.74 (m, 1H), 4.48 (d,  $J = 7.2$  Hz, 1H), 4.40 (d,  $J = 5.6$  Hz, 1H), 4.21-4.07 (m, 2H), 3.94 (d,  $J = 12.0$  Hz, 1H), 3.81 (s, 1H), 3.77 (s, 3H), 3.47 (dd,  $J = 13.8, 5.4$  Hz, 1H), 3.33 (dd,  $J = 13.4, 9.2$  Hz, 1H), 3.08 (d,  $J = 5.4$  Hz, 2H), 2.36-2.20 (m, 1H), 1.92 (dd,  $J = 12.8, 5.0$  Hz, 1H), 1.63-1.53 (m, 1H), 1.23 (d,  $J = 1.4$  Hz, 9H), 1.01-0.89 (m, 12H).

**$^{13}C$  NMR (101 MHz, DMSO)**  $\delta$  178.13, 171.71, 171.26, 171.17, 171.10, 169.29, 139.61, 136.94, 129.17, 128.34, 126.99, 126.23, 59.41, 57.16, 53.25, 52.57, 52.19, 42.26, 38.55, 37.26, 36.67, 34.41, 33.27, 30.10, 27.71, 24.70, 19.62, 18.32, 15.66, 11.41.

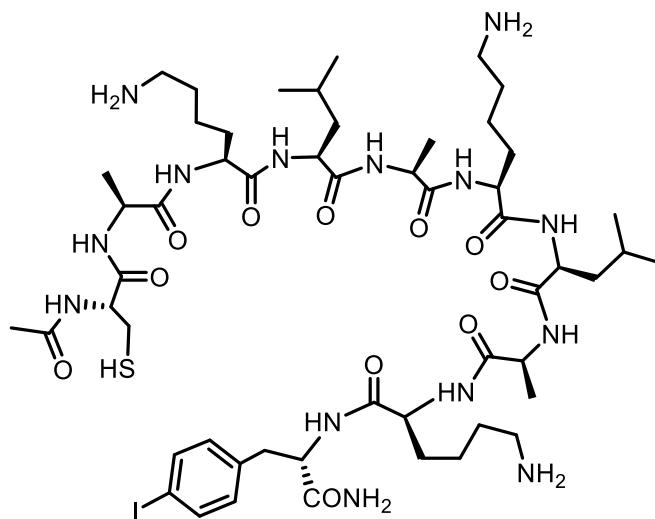

**S16**

Compound **S16** was prepared as a white solid in 85% yield from **Rink-amide AM resin** following the SPPS procedure.

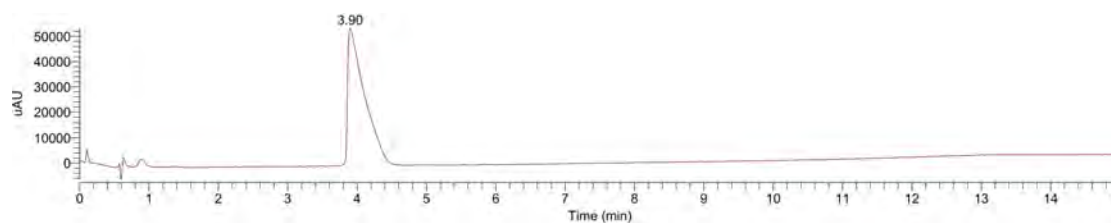

$t_R = 3.90$  min, 5% to 95% B for 10 min, then 95% B 10-15 min,  $\lambda = 254$  nm

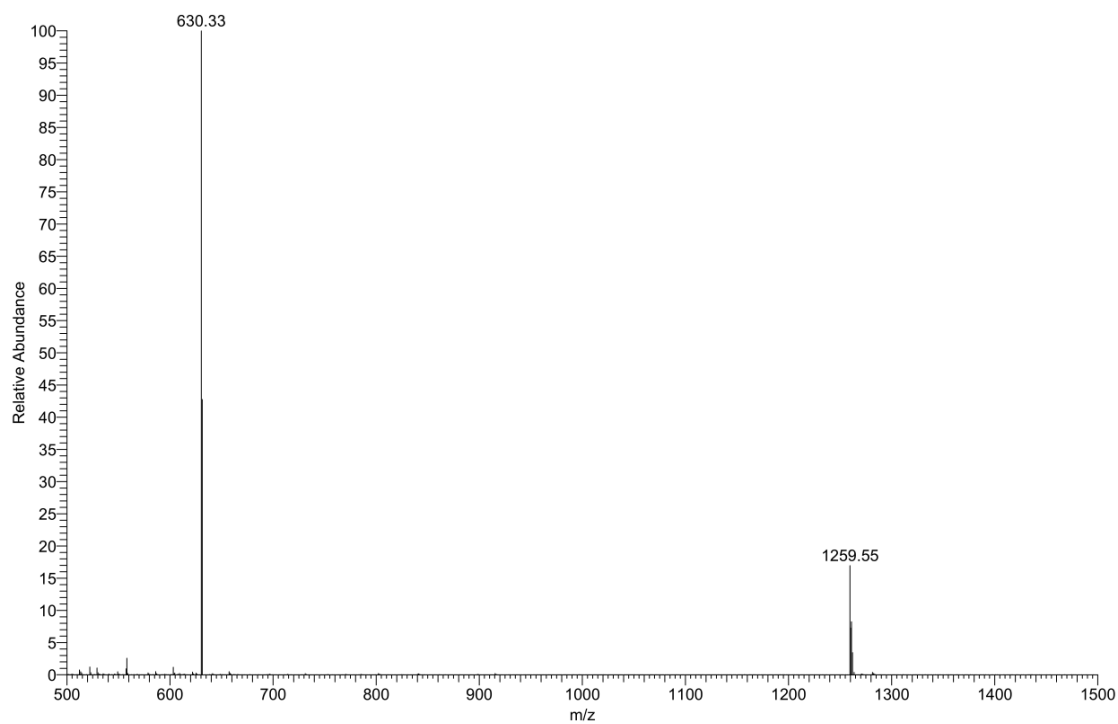

**LRMS:**  $[M+H]^+$  1259.55.



**$^1\text{H}$  NMR (400 MHz, 5% MeOD in DMSO)**  $\delta$  7.56 (d,  $J$  = 7.8 Hz, 2H), 7.05 (d,  $J$  = 7.8 Hz, 2H), 4.47 (t,  $J$  = 7.0 Hz, 1H), 4.37-4.27 (m, 2H), 4.19-4.14 (m, 3H), 4.09 (t,  $J$  = 7.0 Hz, 3H), 2.81-2.64 (m, 9H), 1.89 (s, 3H), 1.69-1.58 (m, 5H), 1.54-1.43 (m, 12H), 1.35-1.28 (m, 3H), 1.23 (dd,  $J$  = 10.4, 6.8 Hz, 12H), 0.84 (d,  $J$  = 6.2 Hz, 6H), 0.79 (d,  $J$  = 6.2 Hz, 6H).

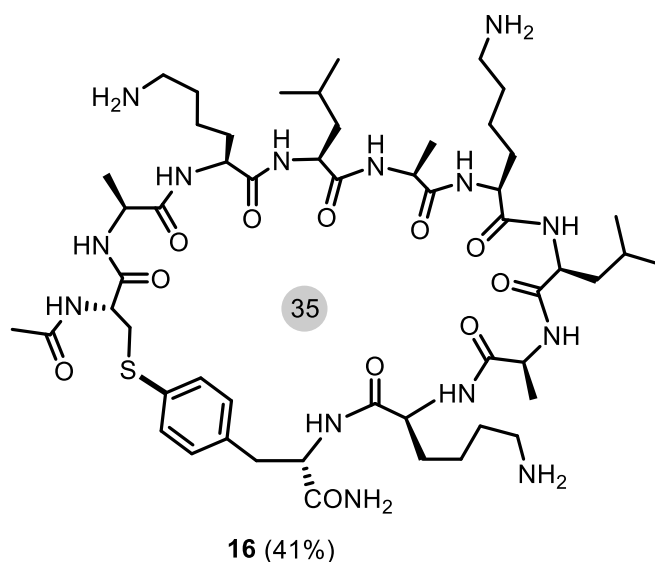

Compound **16** was isolated in 41% yield (46 mg) as a white powder (TFA salt) under the general condition A.

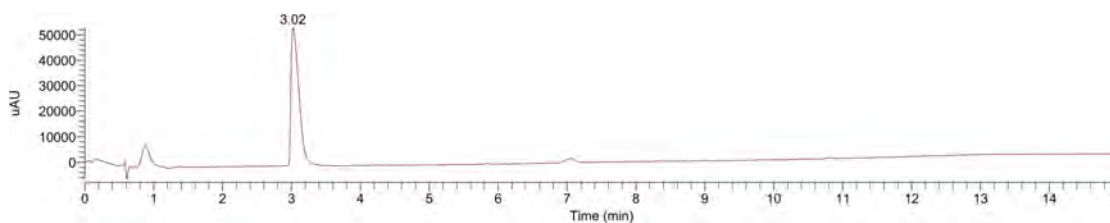

$t_R$  = 3.02 min, 5% to 95% B for 10 min, then 95% B 10-15 min,  $\lambda$  = 254 nm

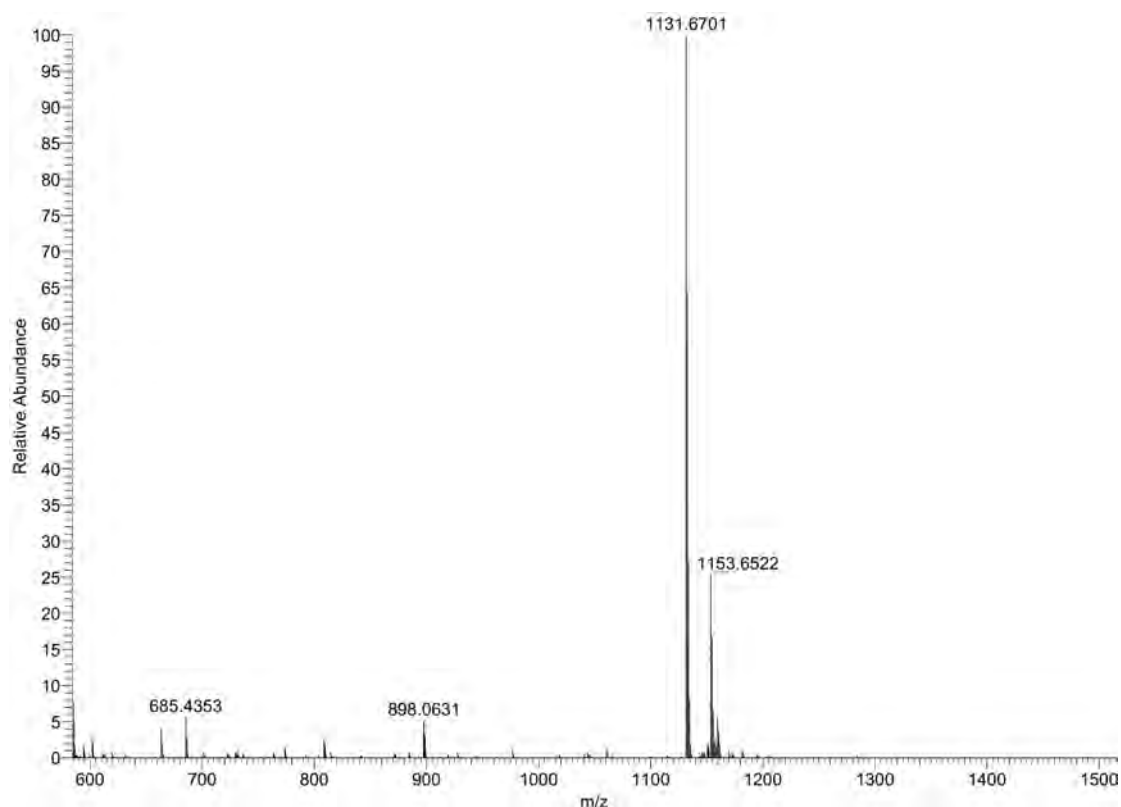

**HRMS:** Calcd for  $C_{53}H_{90}N_{14}O_{11}S$   $[M+H]^+$ : 1131.6707; found: 1131.6701

**$^1H$  NMR (400 MHz, MeOD)**  $\delta$  7.34 (d,  $J = 7.8$  Hz, 2H), 7.21 (d,  $J = 7.8$  Hz, 2H), 4.52-4.43 (m, 1H), 4.36-4.28 (m, 2H), 4.27-4.18 (m, 3H), 4.17-4.07 (m, 3H), 3.23 (dd,  $J = 14.0, 7.8$  Hz, 1H), 3.15 (dd,  $J = 14.2, 4.4$  Hz, 1H), 3.05 (d,  $J = 9.0$  Hz, 1H), 3.00-2.84 (m, 6H), 2.05 (s, 3H), 1.93-1.79 (m, 5H), 1.79-1.59 (m, 12H), 1.57-1.44 (m, 6H), 1.40 (d,  $J = 8.0$  Hz, 9H), 0.92 (dd,  $J = 10.2, 5.8$  Hz, 6H), 0.85 (dd,  $J = 15.0, 6.4$  Hz, 6H).

**$^{13}C$  NMR (101 MHz, DMSO)**  $\delta$  173.37, 172.98, 172.81, 172.70, 172.59, 172.31, 171.81, 170.65, 170.39, 136.23, 134.03, 130.33, 128.68, 79.75, 79.63, 79.42, 79.09, 54.39, 53.68, 53.37, 53.09, 52.18, 49.28, 49.05, 37.05, 35.68, 31.26, 30.81, 29.53, 27.21, 24.61, 23.42, 22.95, 22.60, 21.87, 21.78, 18.05, 17.71.

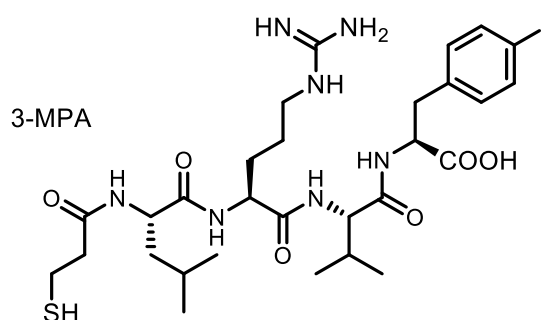

**S17**  
S46

Compound **S17** was prepared as a white solid in 90% yield from 2-Cl-Trt resin following the SPPS procedure.

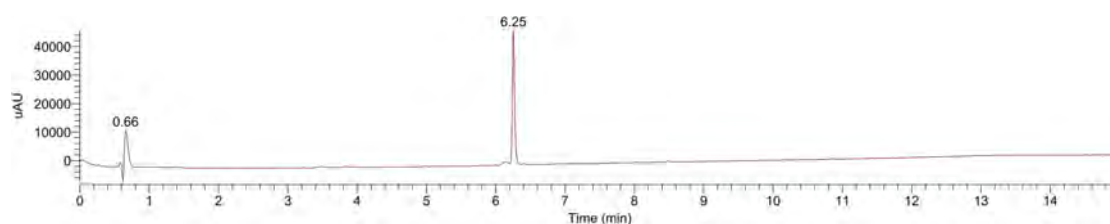

$t_R = 6.25$  min, 5% to 95% B for 10 min, then 95% B 10-15 min,  $\lambda = 254$  nm

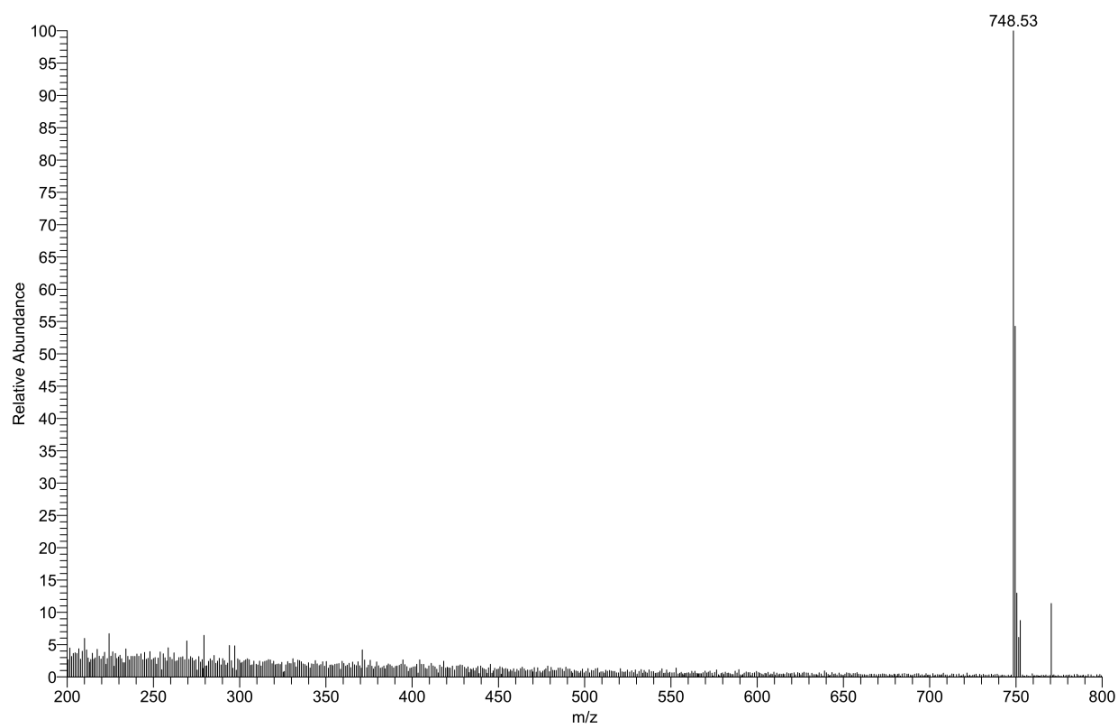

**LRMS:**  $[M+H]^+$  748.53.

**$^1H$  NMR (400 MHz, MeOD)**  $\delta$  7.63 (d,  $J = 8.0$  Hz, 2H), 7.06 (d,  $J = 8.0$  Hz, 2H), 4.66 (dd,  $J = 8.6, 4.8$  Hz, 1H), 4.46-4.34 (m, 2H), 4.18 (d,  $J = 7.2$  Hz, 1H), 3.28-3.07 (m, 4H), 3.03-2.86 (m, 2H), 2.79-2.73 (m, 1H), 2.58 (t,  $J = 6.6$  Hz, 1H), 2.09-1.99 (m, 1H), 1.80 (dd,  $J = 14.4, 6.6$  Hz, 1H), 1.77-1.68 (m, 2H), 1.67-1.54 (m, 4H), 1.01-0.88 (m, 12H).

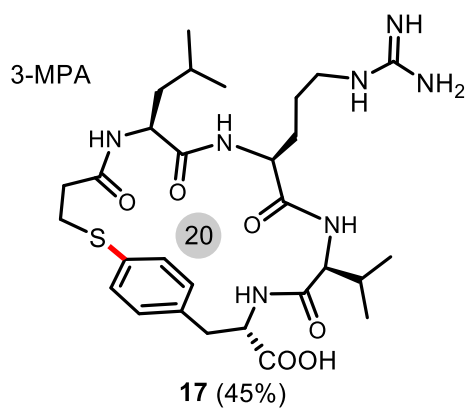

Compound **17** was isolated in 45% yield (27 mg) as a white powder (TFA salt) under the general condition A.

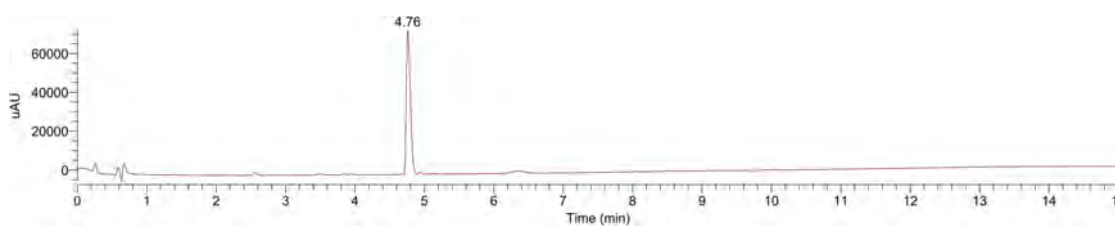

$t_R = 4.76$  min, 5% to 95% B for 10 min, then 95% B 10-15 min,  $\lambda = 254$  nm

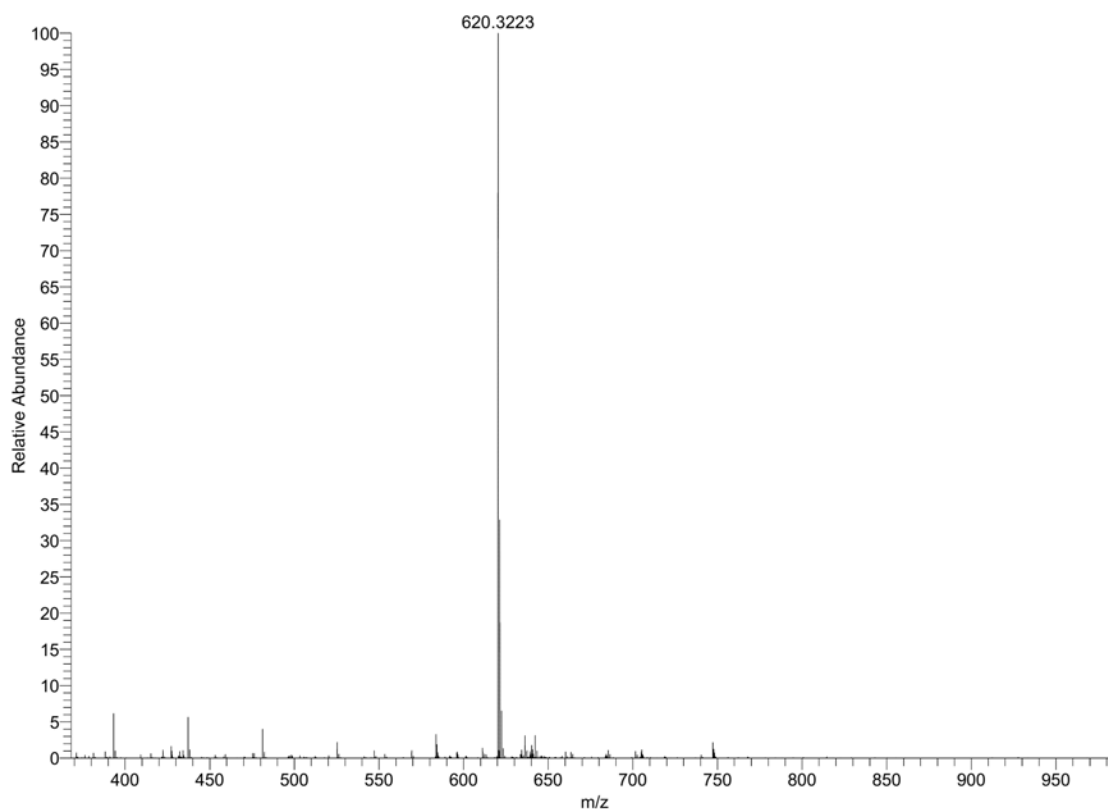

**HRMS:** Calcd for  $C_{29}H_{45}N_7O_6S$   $[M+H]^+$ : 620.3225; found: 620.3223

**$^1H$  NMR (400 MHz, MeOD)**  $\delta$  7.32 (d,  $J = 7.8$  Hz, 2H), 7.18 (d,  $J = 7.8$  Hz, 2H), 4.57

(dd,  $J = 10.0, 4.8$  Hz, 1H), 4.38 (d,  $J = 11.6$  Hz, 1H), 4.24 (d,  $J = 5.4$  Hz, 1H), 4.19 (d,  $J = 8.4$  Hz, 1H), 3.39 (d,  $J = 2.4$  Hz, 2H), 3.22 (d,  $J = 13.4$  Hz, 1H), 2.94-2.84 (m, 2H), 2.76-2.65 (m, 2H), 2.64-2.53 (m, 1H), 2.02 (d,  $J = 6.4$  Hz, 2H), 1.94-1.82 (m, 1H), 1.81-1.67 (m, 2H), 1.67-1.58 (m, 2H), 1.42 (dd,  $J = 15.4, 8.6$  Hz, 1H), 1.02-0.86 (m, 12H).  
 $^{13}\text{C}$  NMR (101 MHz, DMSO)  $\delta$  173.92, 171.95, 171.74, 171.70, 170.41, 157.18, 136.22, 133.80, 130.61, 129.33, 59.61, 51.42, 50.90, 40.94, 35.84, 30.15, 24.64, 23.45, 21.64, 19.56, 19.37.

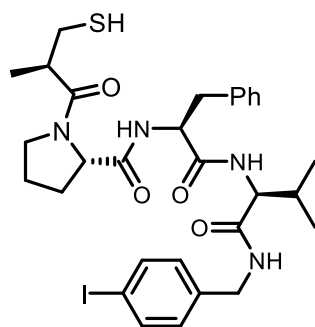

**S18**

Compound **S18** was prepared as from 2-Cl-Trt resin following the SPPS procedure. 4-iodobenzylamine was coupled, following the general amide coupling procedure to give compound **S18** as white solid in 87% yield.

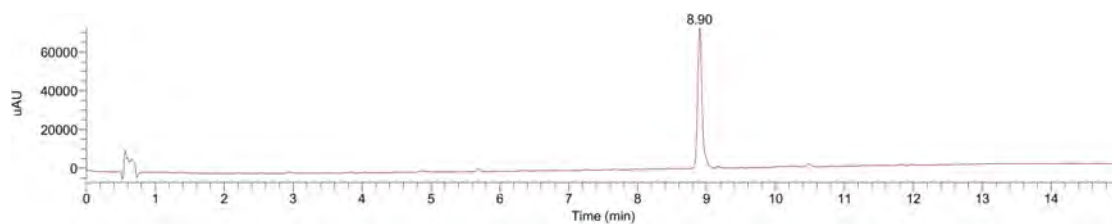

$t_R = 8.90$  min, 5% to 95% B for 10 min, then 95% B 10-15 min,  $\lambda = 254$  nm

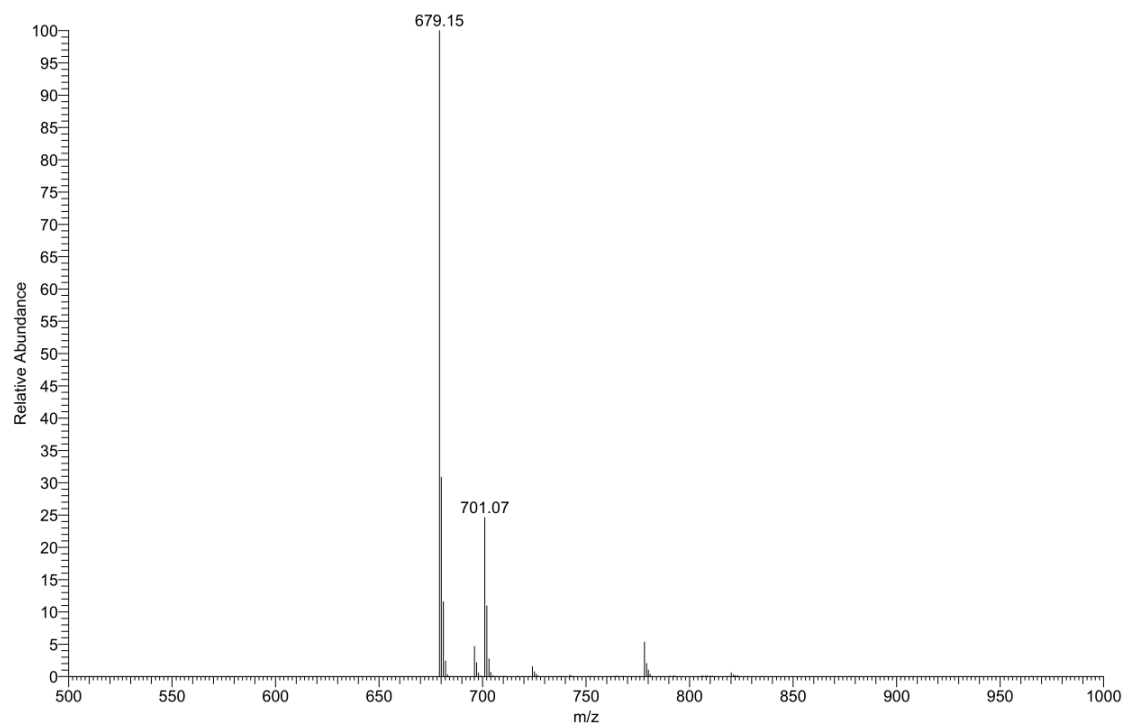

**LRMS:**  $[M+H]^+$  679.15;  $[M+Na]^+$  701.07.

**$^1H$  NMR (400 MHz, MeOD)**  $\delta$  7.67 (s, 1H), 7.59 (d,  $J = 7.8$  Hz, 1H), 7.30-7.25 (m, 2H), 7.22-7.17 (m, 4H), 7.08 (t,  $J = 7.8$  Hz, 1H), 4.58 (t,  $J = 7.0$  Hz, 1H), 4.40 (dd,  $J = 8.6, 3.8$  Hz, 1H), 4.33-4.27 (m, 2H), 4.17 (dd,  $J = 13.4, 7.2$  Hz, 1H), 3.78-3.57 (m, 2H), 3.33-3.27 (m, 1H), 3.18-3.02 (m, 2H), 2.90-2.62 (m, 2H), 2.45 (dd,  $J = 13.2, 5.4$  Hz, 1H), 2.13-2.00 (m, 2H), 1.95-1.85 (m, 2H), 1.13 (d,  $J = 6.8$  Hz, 3H), 0.91 (d,  $J = 6.8$  Hz, 6H).

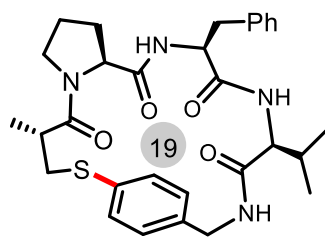

**18** (52%)

Compound **18** was isolated in 52% yield (28 mg) as a white powder under the general condition A.

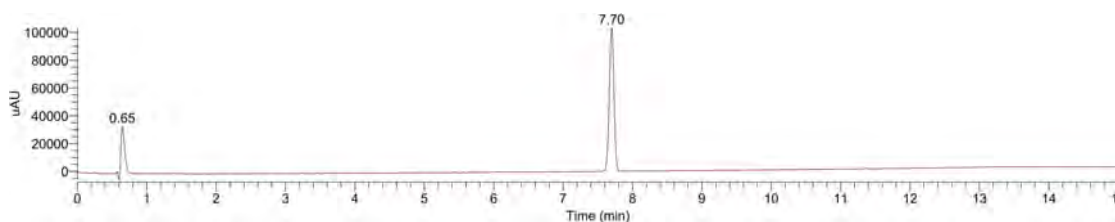

$t_R = 7.70$  min, 5% to 95% B for 10 min, then 95% B 10-15 min,  $\lambda = 254$  nm

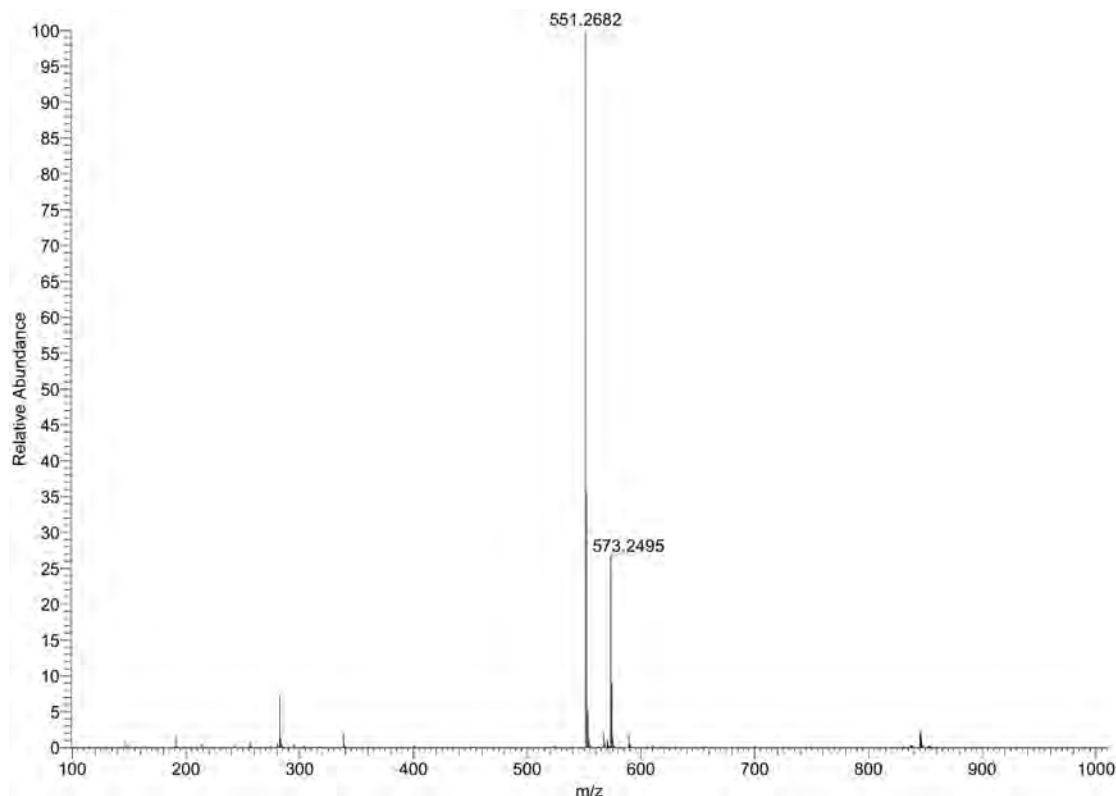

**HRMS:** Calcd for  $C_{30}H_{38}N_4O_4S$   $[M+H]^+$ : 551.2687; found: 551.2682

**18** should be a mixture of conformational isomers determined by  $^1H$  NMR in different deuterated solvents (see  $^1H$  NMR spectrum).

**$^1H$  NMR (400 MHz, MeOD)**  $\delta$  7.66 (s, 1H), 7.30-7.19 (m, 6H), 7.18 (d,  $J = 6.0$  Hz, 1H), 7.06 (d,  $J = 5.6$  Hz, 1H), 4.94 (d,  $J = 14.8$  Hz, 1H), 4.67 (d,  $J = 3.8$  Hz, 1H), 4.26 (dd,  $J = 9.6, 4.6$  Hz, 1H), 3.87 (d,  $J = 14.6$  Hz, 2H), 3.62 (q,  $J = 8.6, 8.0$  Hz, 1H), 3.49-3.37 (m, 2H), 3.20 (dd,  $J = 14.4, 4.8$  Hz, 1H), 3.08 (s, 1H), 2.93 (d,  $J = 14.2$  Hz, 1H), 2.84-2.75 (m, 1H), 2.63-2.47 (m, 1H), 1.93 (dd,  $J = 18.0, 6.6$  Hz, 2H), 1.84 (d,  $J = 6.6$  Hz, 1H), 1.74-1.61 (m, 1H), 1.19 (d,  $J = 6.8$  Hz, 3H), 0.97 (dd,  $J = 27.0, 6.8$  Hz, 6H).

**$^{13}C$  NMR (101 MHz, Acetone)**  $\delta$  175.50, 173.00, 172.92, 172.31, 172.23, 170.95, 170.88, 140.02, 138.90, 135.73, 135.68, 131.04, 129.62, 129.32, 129.28, 129.18,

128.81, 127.38, 127.18, 127.14, 63.10, 63.07, 58.22, 58.16, 58.07, 57.99, 48.48, 43.54, 43.43, 40.72, 36.69, 36.64, 36.58, 25.39, 20.24, 18.37, 17.55.

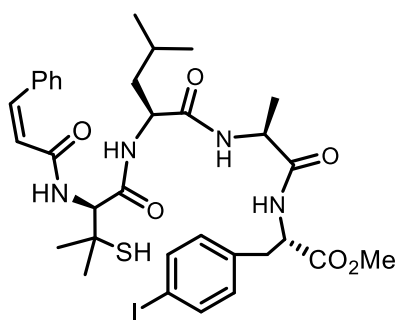

**S19**

Compound **S19** was prepared as a white solid in 91% yield from 2-Cl-Trt resin following the SPPS procedure.

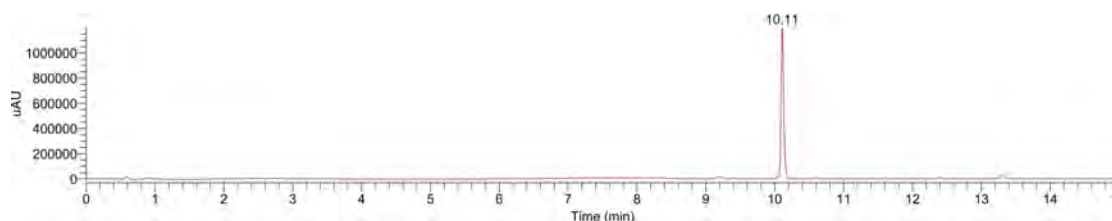

$t_R = 10.11$  min, 5% to 95% B for 10 min, then 95% B 10-15 min,  $\lambda = 254$  nm

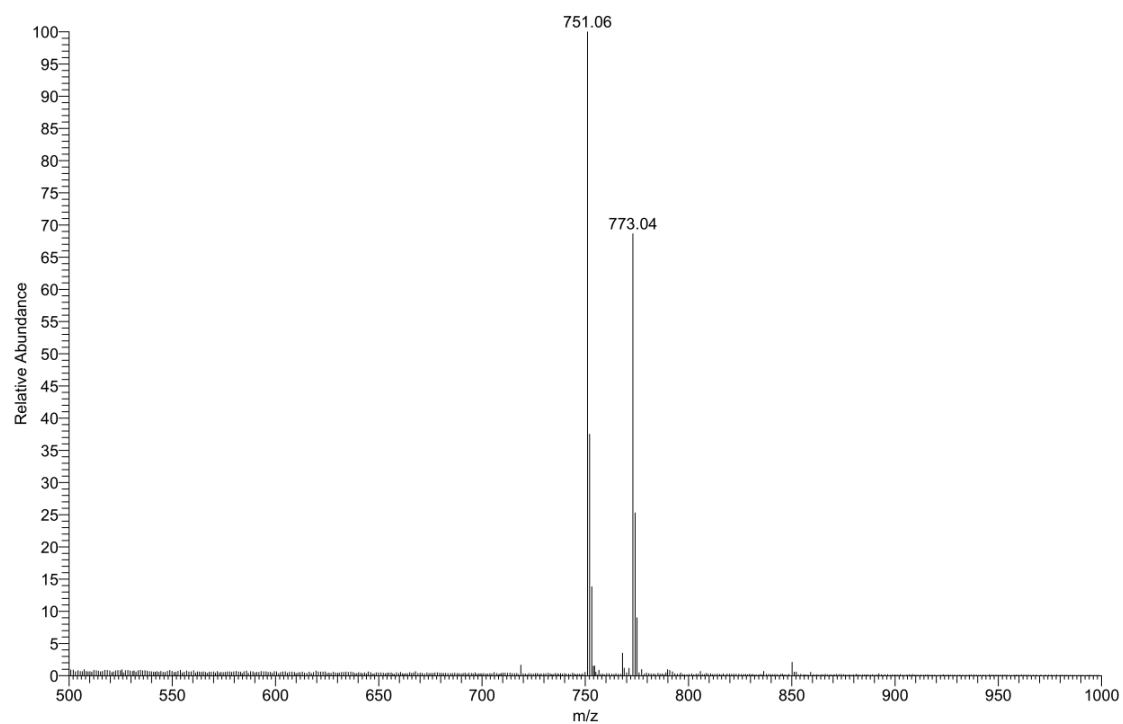

**LRMS:**  $[M+H]^+$  751.06;  $[M+Na]^+$  773.04.



**<sup>1</sup>H NMR (400 MHz, AcOD)**  $\delta$  7.73 (d,  $J$  = 15.8 Hz, 1H), 7.66-7.55 (m, 4H), 7.46-7.36 (m, 3H), 6.94 (d,  $J$  = 8.2 Hz, 2H), 6.84 (d,  $J$  = 15.8 Hz, 1H), 4.98 (s, 1H), 4.82 (dd,  $J$  = 7.2, 5.4 Hz, 1H), 4.65 (q,  $J$  = 7.0 Hz, 1H), 4.59 (dd,  $J$  = 10.4, 4.6 Hz, 1H), 3.73 (s, 3H), 3.18-3.09 (m, 1H), 2.99 (dd,  $J$  = 14.0, 7.4 Hz, 1H), 1.80 (dd,  $J$  = 12.8, 7.8 Hz, 1H), 1.76-1.67 (m, 1H), 1.58 (dd,  $J$  = 9.4, 4.4 Hz, 1H), 1.54 (s, 3H), 1.44 (s, 3H), 1.36 (d,  $J$  = 7.0 Hz, 3H), 0.98 (dd,  $J$  = 14.8, 6.4 Hz, 6H).

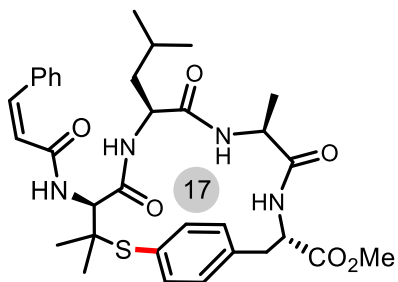

**19** (81%)

Compound **19** was isolated in 81% yield (50 mg) as a white powder under the general condition B.

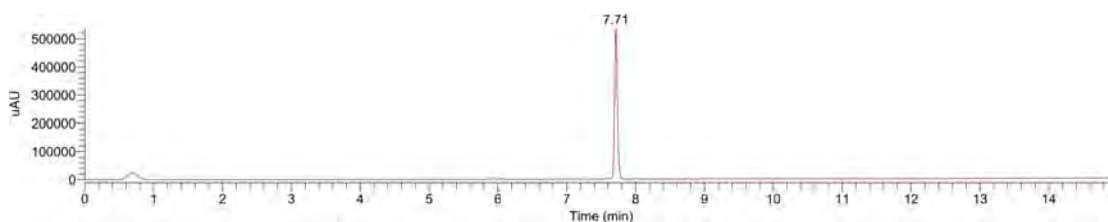

$t_R$  = 7.71 min, 5% to 95% B for 10 min, then 95% B 10-15 min,  $\lambda$  = 254 nm

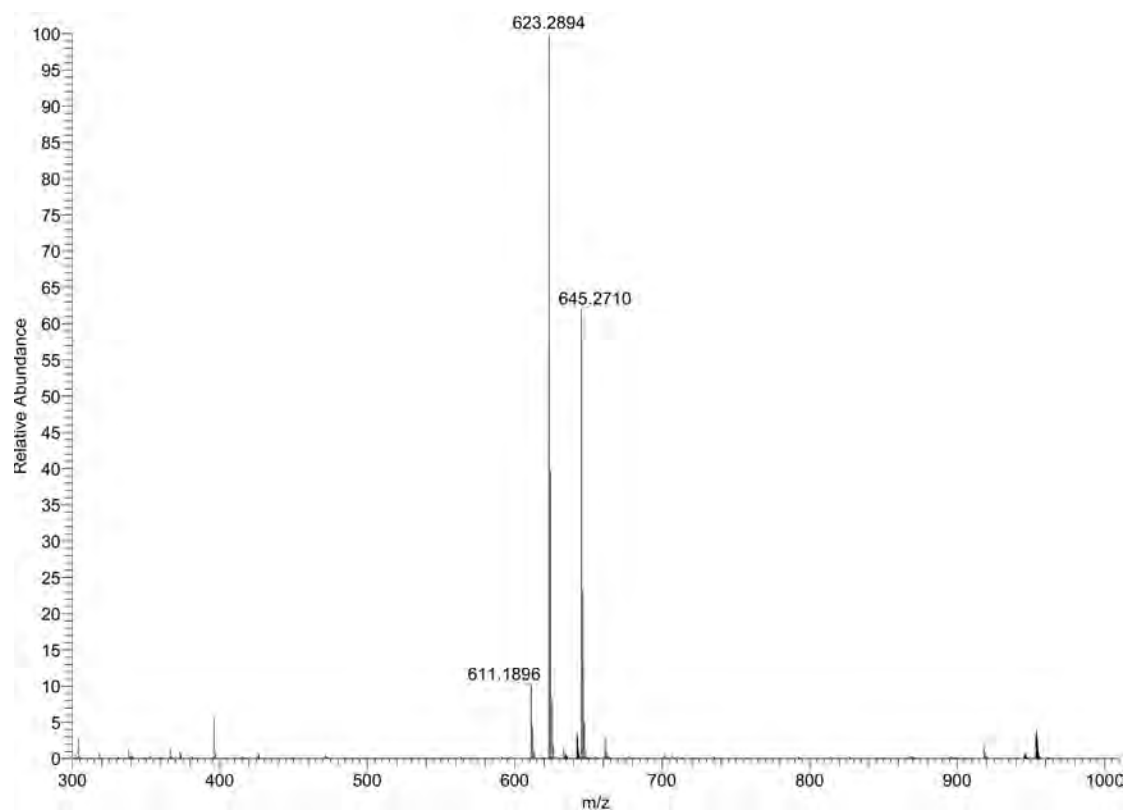

**HRMS:** Calcd for  $C_{33}H_{42}N_4O_6S$   $[M+H^+]$ : 623.2898; found: 623.2894

**$^1H$  NMR (400 MHz, MeOD)**  $\delta$  7.61-7.54 (m, 3H), 7.47-7.36 (m, 5H), 7.10 (d,  $J = 7.6$  Hz, 2H), 6.83 (d,  $J = 15.6$  Hz, 1H), 4.70-4.59 (m, 2H), 4.35 (dd,  $J = 9.2, 4.4$  Hz, 2H), 3.80 (s, 3H), 3.26 (d,  $J = 3.0$  Hz, 1H), 2.71 (t,  $J = 12.6$  Hz, 1H), 1.62 (d,  $J = 10.0$  Hz, 1H), 1.58 (s, 3H), 1.54-1.43 (m, 2H), 1.22 (t,  $J = 3.5$  Hz, 6H), 0.86 (dd,  $J = 25.0, 6.0$  Hz, 6H).

**$^{13}C$  NMR (101 MHz, DMSO)**  $\delta$  171.96, 171.46, 171.23, 169.45, 165.21, 139.85, 138.75, 137.91, 135.30, 130.05, 129.75, 129.44, 127.98, 122.13, 64.07, 53.37, 52.68, 49.53, 48.72, 41.67, 37.63, 30.45, 24.41, 24.28, 23.60, 22.02, 17.89.

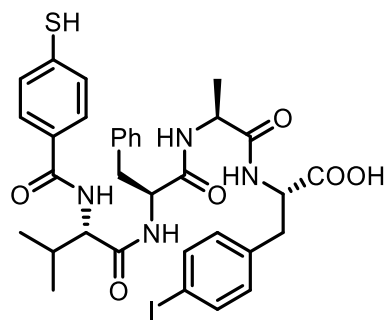

**S20**

Compound **S20** was prepared as a white solid in 89% yield from 2-Cl-Trt resin following the SPPS procedure.

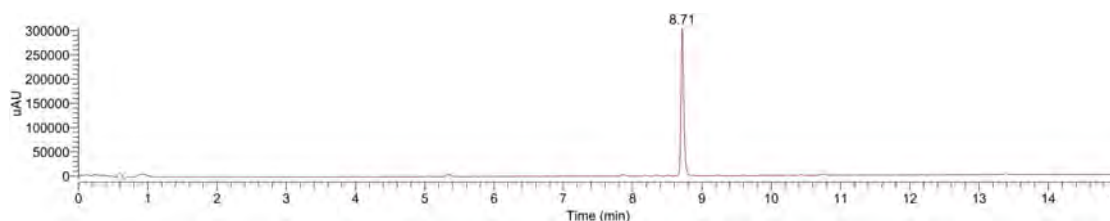

$t_R = 8.71$  min, 5% to 95% B for 10 min, then 95% B 10-15 min,  $\lambda = 254$  nm

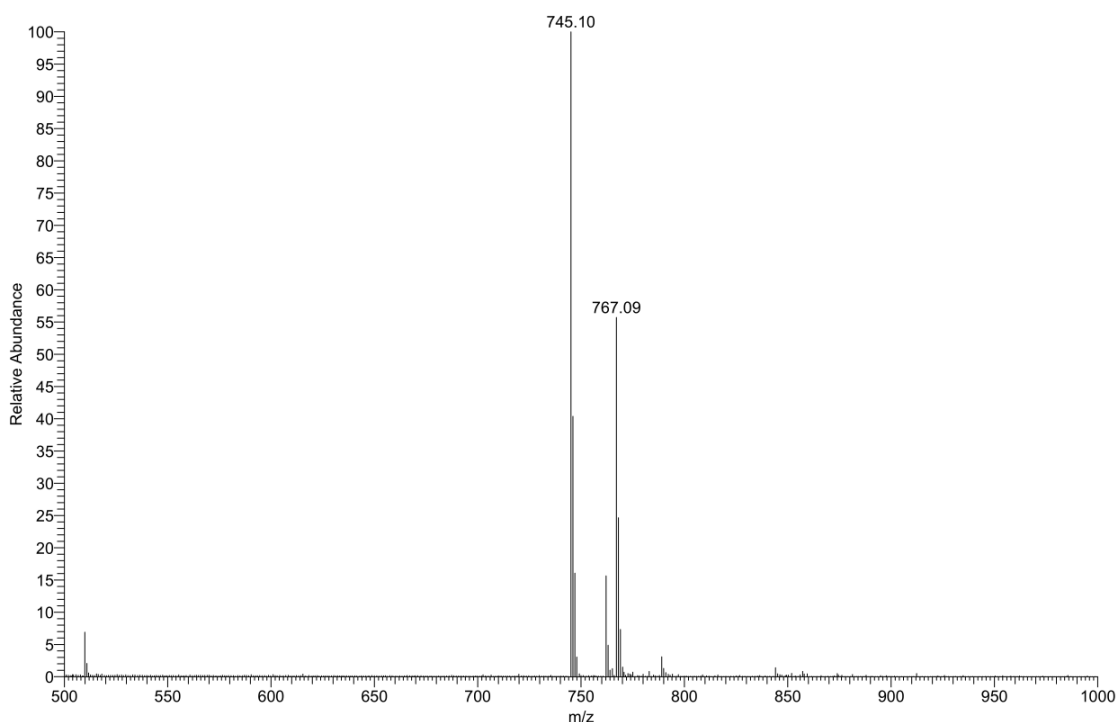

**LRMS:**  $[M+H]^+$  745.10;  $[M+Na]^+$  767.09.

**$^1H$  NMR (400 MHz, MeOD)**  $\delta$  8.84 (d,  $J = 10.0$  Hz, 2H), 8.76 (t,  $J = 9.0$  Hz, 2H), 8.48 (d,  $J = 8.1$  Hz, 1H), 8.33 (d,  $J = 8.1$  Hz, 2H), 8.09 (d,  $J = 8.4$  Hz, 2H), 7.98-7.14 (m, 2H), 7.90-7.81 (m, 2H), 7.75 (d,  $J = 8.2$  Hz, 1H), 5.42-5.33 (m, 1H), 5.32-5.15 (m, 1H), 5.15-5.04 (m, 1H), 4.97 (t,  $J = 8.2$  Hz, 1H), 3.84-3.73 (m, 2H), 3.67 (dd,  $J = 13.8, 8.2$  Hz, 1H), 3.58 (dd,  $J = 14.0, 9.4$  Hz, 1H), 2.80 (q,  $J = 7.0$  Hz, 1H), 1.97 (d,  $J = 7.0$  Hz, 3H), 1.57 (dd,  $J = 27.8, 6.6$  Hz, 6H).

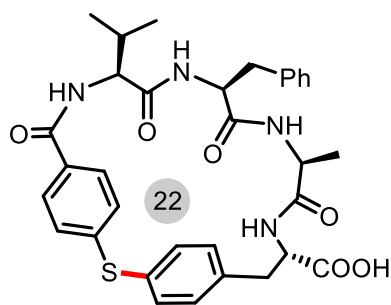

**20** (30%)

Compound **20** was isolated in 30% yield (18 mg) as a white powder under the general condition A.

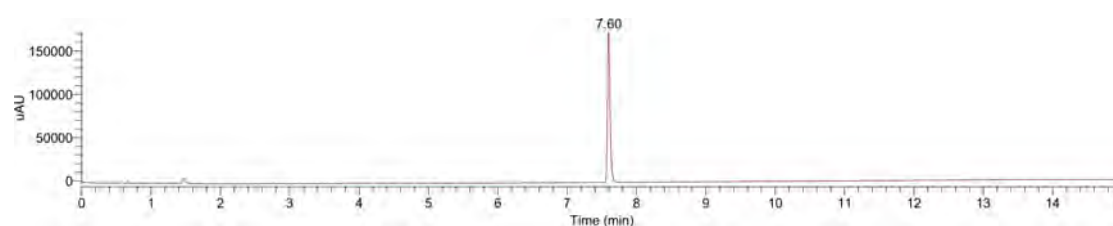

$t_R = 7.60$  min, 5% to 95% B for 10 min, then 95% B 10-15 min,  $\lambda = 254$  nm

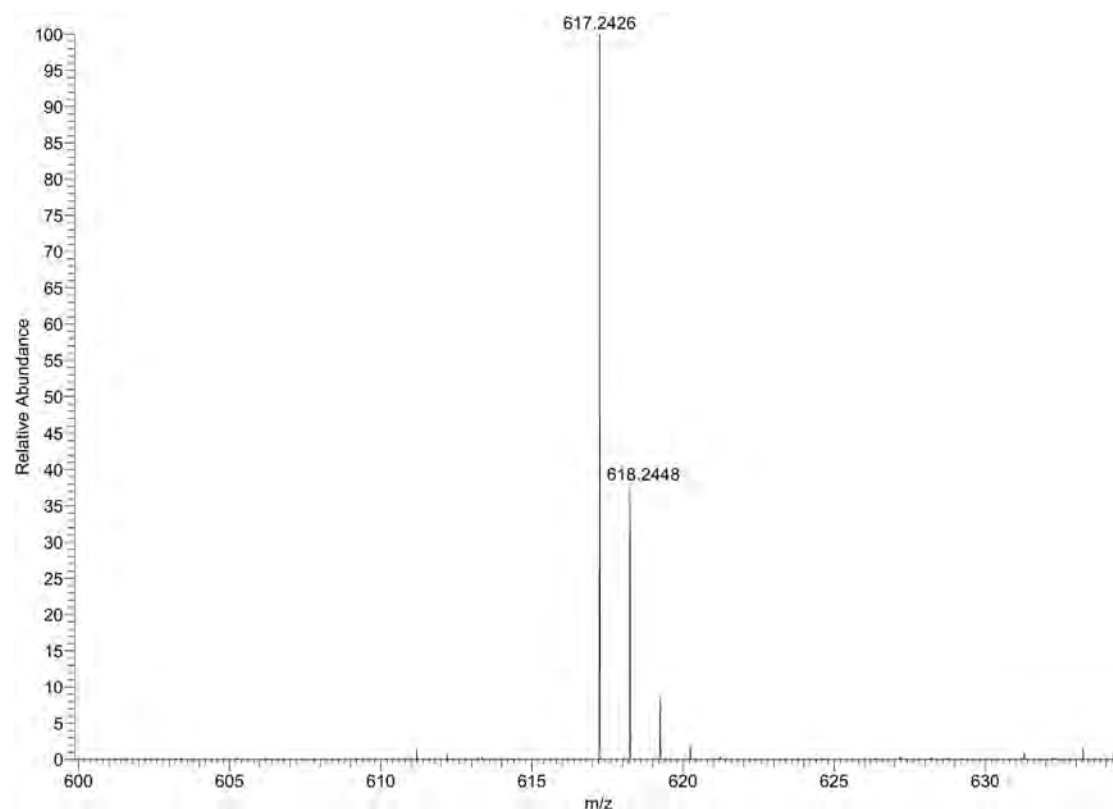

**HRMS:** Calcd for  $C_{33}H_{36}N_4O_6S$   $[M+H]^+$ : 617.2428; found: 617.2426

**$^1H$  NMR (400 MHz, MeOD)**  $\delta$  7.66 (d,  $J = 8.2$  Hz, 2H), 7.34 (s, 4H), 7.18 (d,  $J = 6.8$  Hz, 4H), 7.11 (d,  $J = 6.6$  Hz, 1H), 6.90 (d,  $J = 8.0$  Hz, 2H), 4.64 (dd,  $J = 10.8, 4.4$  Hz,

1H), 4.37 (d,  $J = 11.6$  Hz, 1H), 3.95 (d,  $J = 9.6$  Hz, 2H), 3.35-3.25 (m, 2H), 2.86-2.71 (m, 1H), 2.66 (dd,  $J = 14.0, 10.8$  Hz, 1H), 1.71-1.57 (m, 1H), 1.35 (d,  $J = 7.2$  Hz, 3H), 0.82 (d,  $J = 6.4$  Hz, 3H), 0.45 (d,  $J = 6.6$  Hz, 3H).

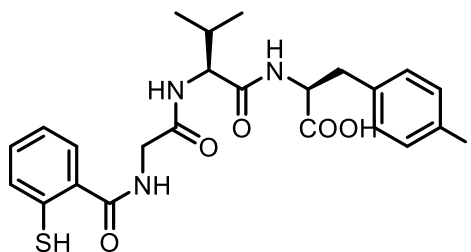

**S21**

Compound **S21** was prepared as a white solid in 93% yield from 2-Cl-Trt resin following the SPPS procedure.

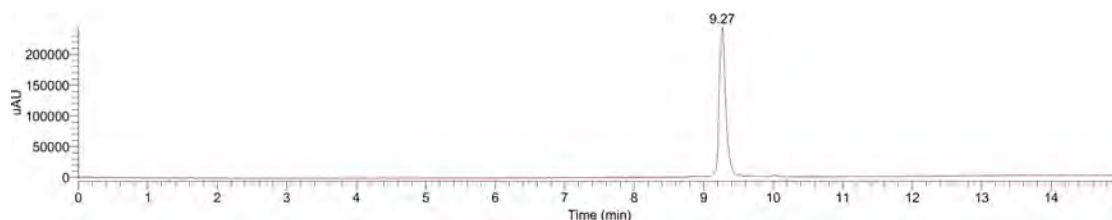

$t_R = 9.27$  min, 5% to 95% B for 10 min, then 95% B 10-15 min,  $\lambda = 254$  nm

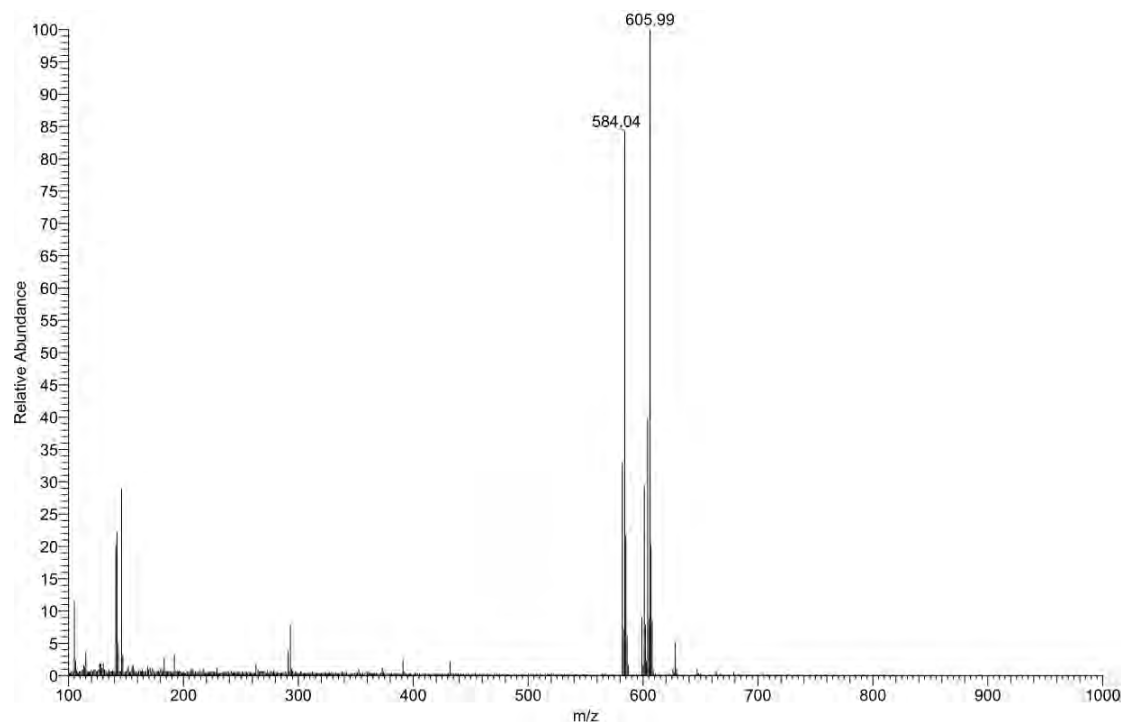

**LRMS:**  $[M+H]^+$  584.04;  $[M+Na]^+$  605.99.

**$^1H$  NMR (400 MHz, MeOD)**  $\delta$  7.77 (d,  $J = 7.6$  Hz, 1H), 7.69 (dd,  $J = 7.6, 1.2$  Hz, 1H), 7.58 (d,  $J = 8.2$  Hz, 2H), 7.43-7.36 (m, 1H), 7.35-7.22 (m, 1H), 7.01 (d,  $J = 8.2$

Hz, 2H), 4.65 (dd,  $J = 8.4, 5.0$  Hz, 1H), 4.33-4.22 (m, 1H), 4.07 (s, 2H), 3.14 (dd,  $J = 13.4, 4.6$  Hz, 1H), 2.95 (dd,  $J = 13.8, 8.6$  Hz, 1H), 2.06 (dd,  $J = 14.4, 7.6$  Hz, 1H), 0.91 (dd,  $J = 15.4, 6.8$  Hz, 6H).

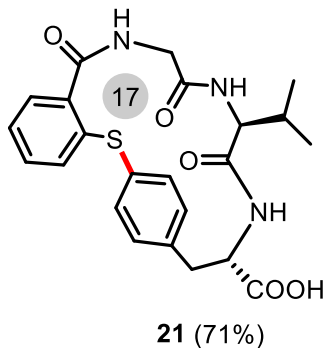

Compound **21** was isolated in 71% yield (32 mg) as a white powder under the general condition A (6 h).

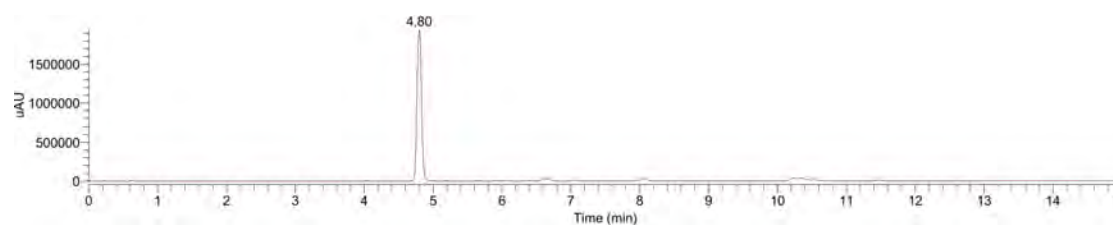

$t_R = 4.80$  min, 5% to 95% B for 10 min, then 95% B 10-15 min,  $\lambda = 254$  nm

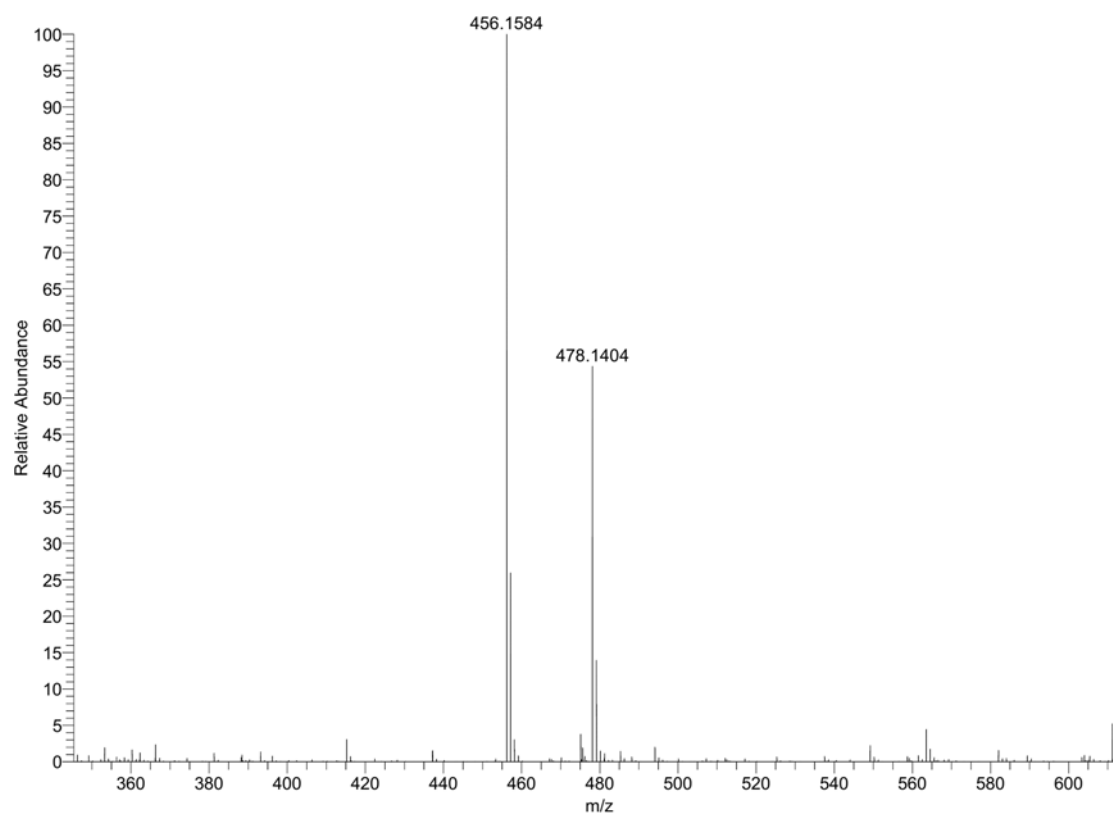

**HRMS:** Calcd for C<sub>23</sub>H<sub>25</sub>N<sub>3</sub>O<sub>5</sub>S [M+H<sup>+</sup>]: 456.1588; found: 456.1584

**<sup>1</sup>H NMR (400 MHz, DMSO)** δ 8.14 (d, *J* = 8.9 Hz, 1H), 7.88 (d, *J* = 8.8 Hz, 1H), 7.80 (s, 1H), 7.74 (d, *J* = 5.9 Hz, 1H), 7.61-7.50 (m, 3H), 7.03 (d, *J* = 8.1 Hz, 2H), 6.85 (d, *J* = 8.1 Hz, 2H), 4.53 (t, *J* = 9.0 Hz, 1H), 3.98-3.86 (m, 2H), 3.65 (dd, *J* = 15.8, 4.7 Hz, 1H), 3.10 (d, *J* = 10.6 Hz, 1H), 2.63 (t, *J* = 12.8 Hz, 1H), 1.88-1.73 (m, 1H), 0.81 (t, *J* = 6.0 Hz, 6H).

**<sup>13</sup>C NMR (101 MHz, DMSO)** δ 173.58, 167.84, 166.79, 141.39, 137.57, 136.59, 133.97, 131.06, 130.51, 130.09, 129.85, 129.57, 127.62, 58.54, 42.84, 29.82, 19.54, 19.18, 18.50.

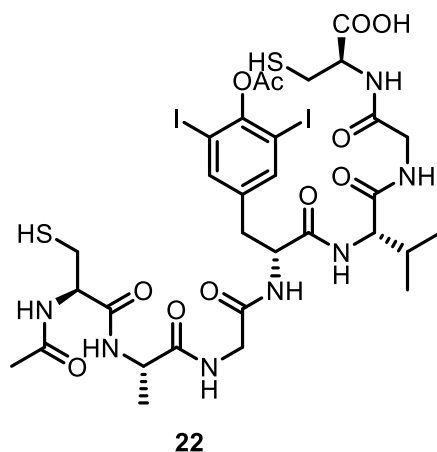

Compound **22** was prepared as a white solid in 88% yield from 2-Cl-Trt resin following the SPPS procedure.

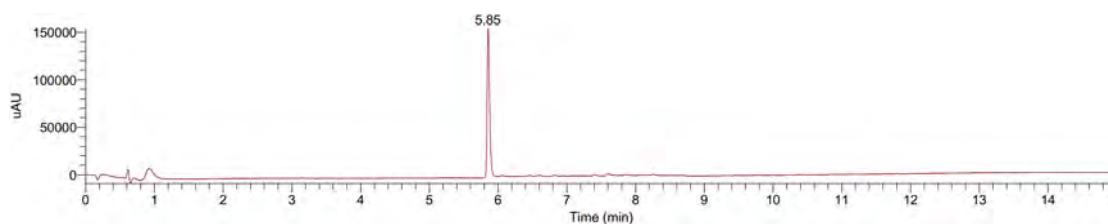

*t<sub>R</sub>* = 5.85 min, 5% to 95% B for 10 min, then 95% B 10-15 min, λ = 254 nm

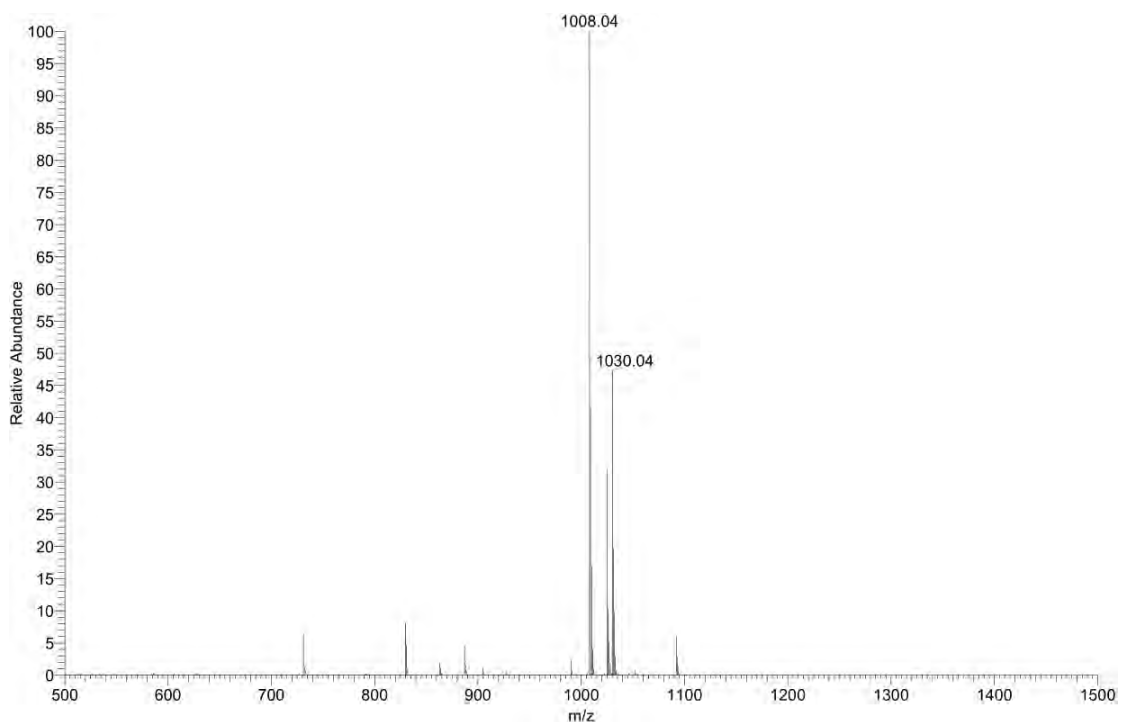

**LRMS:**  $[M+H]^+$  1008.04;  $[M+Na]^+$  1030.04.

**$^1\text{H}$  NMR (400 MHz, DMSO)**  $\delta$  7.78 (s, 2H), 4.66-4.56 (m, 1H), 4.48-4.40 (m, 1H), 4.40-4.34 (m, 1H), 4.23 (t,  $J = 7.0$  Hz, 1H), 4.17 (dd,  $J = 8.6, 6.6$  Hz, 1H), 3.86 (dd,  $J = 16.6, 5.8$  Hz, 1H), 3.79-3.68 (m, 2H), 3.60 (dd,  $J = 16.8, 5.4$  Hz, 1H), 2.99-2.91 (m, 1H), 2.89-2.83 (m, 1H), 2.81-2.71 (m, 2H), 2.68-2.60 (m, 1H), 2.42 (t,  $J = 8.4$  Hz, 1H), 2.35 (s, 3H), 2.04-1.94 (m, 1H), 1.86 (s, 3H), 1.09 (t,  $J = 7.0$  Hz, 3H), 0.88 (dd,  $J = 6.8, 2.0$  Hz, 6H).

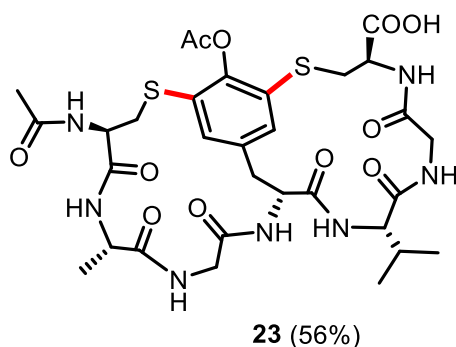

Compound **23** was isolated in 56% yield (42 mg) as a white powder under the general condition A (10 mol% catalyst, 3 equiv DIPEA, 16h).



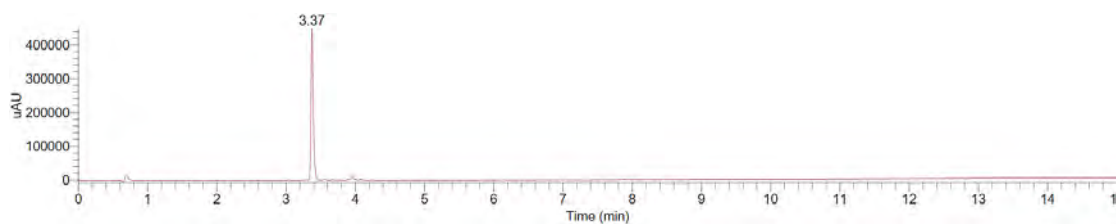

$t_R = 3.37$  min, 5% to 95% B for 10 min, then 95% B 10-15 min,  $\lambda = 254$  nm

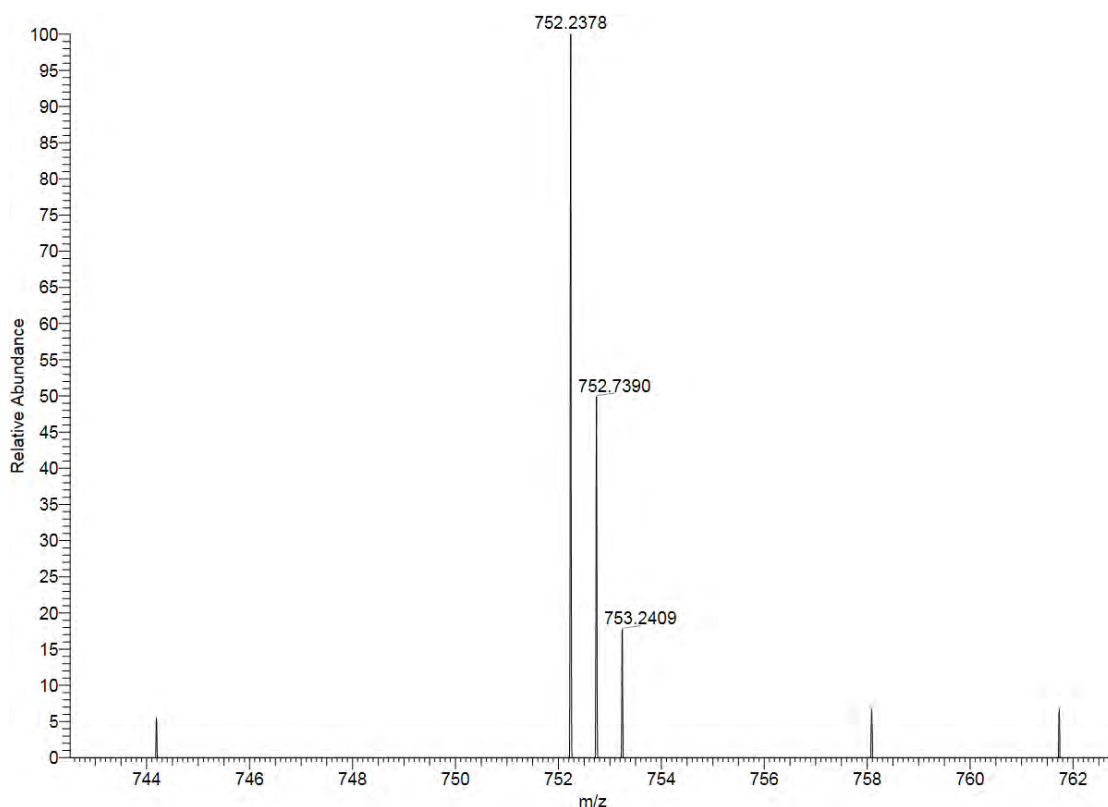

**HRMS:** Calcd for  $C_{31}H_{41}N_7O_{11}S_2$   $[M+H]^+$ : 752.2378; found: 752.2378.

**$^1H$  NMR (400 MHz, DMSO)**  $\delta$  7.21 (s, 1H), 7.01 (s, 1H), 5.28-5.09 (m, 1H), 4.98-4.80 (m, 1H), 4.50 (d,  $J = 7.2$  Hz, 1H), 4.34 (q,  $J = 7.4$  Hz, 2H), 4.23 (s, 1H), 3.93 (dd,  $J = 15.8, 7.2$  Hz, 2H), 3.54 (d,  $J = 4.6$  Hz, 2H), 3.12 (d,  $J = 13.4$  Hz, 3H), 3.03 (d,  $J = 18.6$  Hz, 2H), 2.32 (s, 3H), 2.07-1.98 (m, 1H), 1.84 (s, 3H), 1.21 (s, 3H), 0.84 (dd,  $J = 6.8, 3.6$  Hz, 6H).

**$^{13}C$  NMR (101 MHz, DMSO)**  $\delta$  171.81, 170.41, 169.73, 169.13, 168.50, 136.12, 134.46, 130.82, 129.86, 128.74, 124.13, 121.73, 57.91, 53.76, 52.34, 48.65, 44.60, 43.09, 37.37, 36.02, 31.79, 31.19, 27.01, 25.57, 22.83, 22.56, 19.82, 18.10.

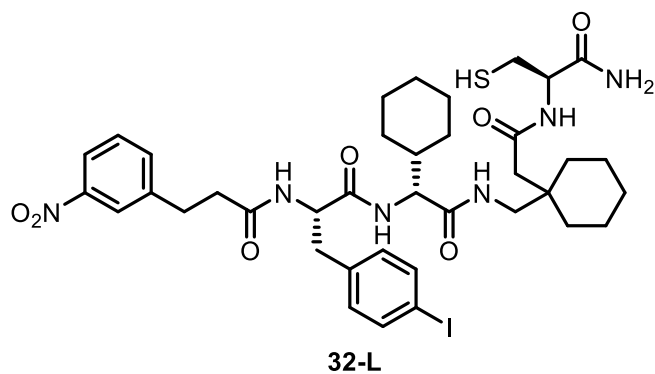

Compound **32-L** was prepared as a white solid in 90% yield from **Rink-amide AM resin** following the SPPS procedure.

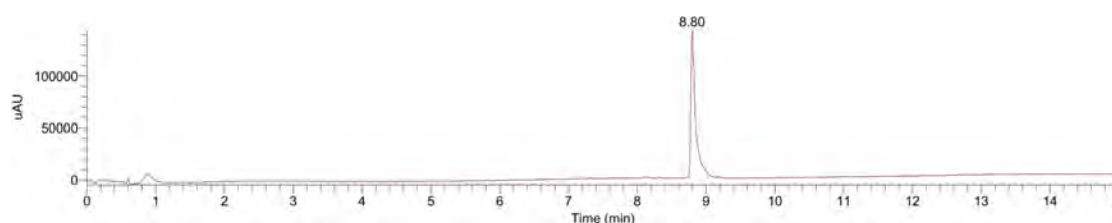

$t_R = 8.80$  min, 5% to 95% B for 10 min, then 95% B 10-15 min,  $\lambda = 254$  nm

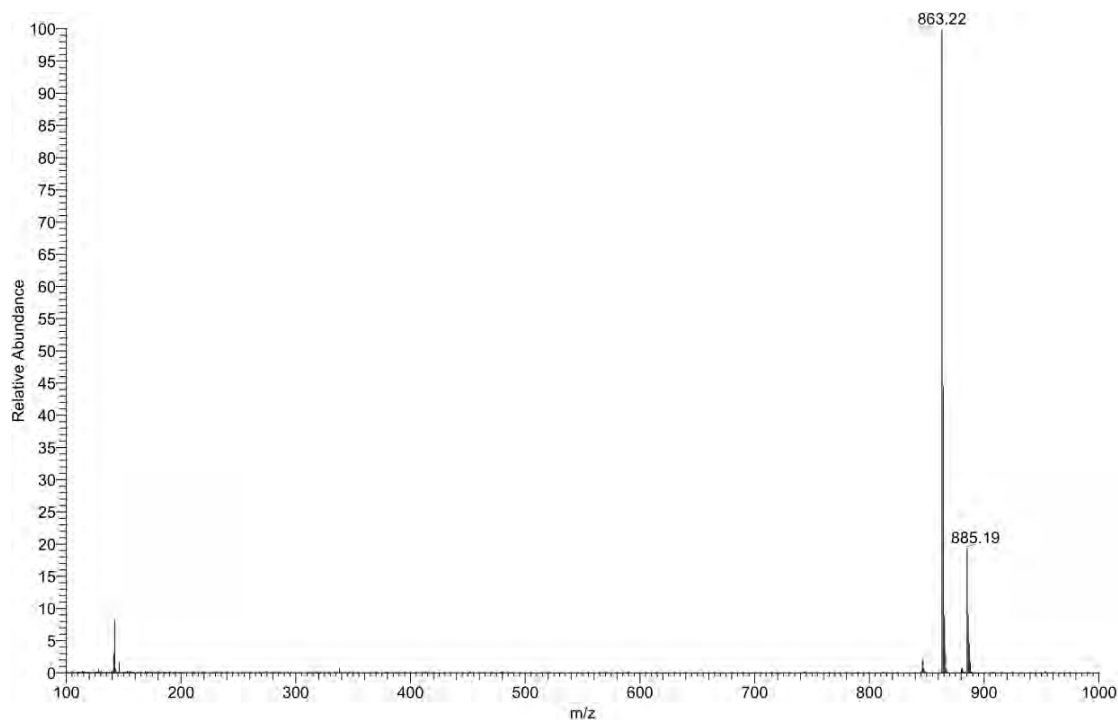

**LRMS:**  $[M+H]^+$  863.22;  $[M+Na]^+$  885.19.

**$^1H$  NMR (400 MHz, MeOD)**  $\delta$  8.07 (d,  $J = 5.8$  Hz, 2H), 7.61 (d,  $J = 7.6$  Hz, 2H), 7.54 (d,  $J = 7.2$  Hz, 1H), 7.48 (dd,  $J = 10.2, 6.0$  Hz, 1H), 6.98 (d,  $J = 7.6$  Hz, 2H), 4.86-4.79

(m, 1H), 4.64 (d,  $J = 7.6$  Hz, 1H), 4.59 (t,  $J = 8.4$  Hz, 1H), 4.08 (d,  $J = 5.6$  Hz, 1H), 3.36-3.21 (m, 2H), 3.06-2.98 (m, 2H), 2.96-2.81 (m, 4H), 2.57 (t,  $J = 7.4$  Hz, 2H), 2.22 (d,  $J = 4.2$  Hz, 2H), 1.71 (d,  $J = 12.0$  Hz, 3H), 1.64 (d,  $J = 12.4$  Hz, 1H), 1.50 (q,  $J = 10.6, 9.0$  Hz, 5H), 1.45-1.39 (m, 3H), 1.36 (t,  $J = 9.6$  Hz, 4H), 1.23-1.13 (m, 2H), 0.85-0.72 (m, 1H), 0.70-0.58 (m, 1H).

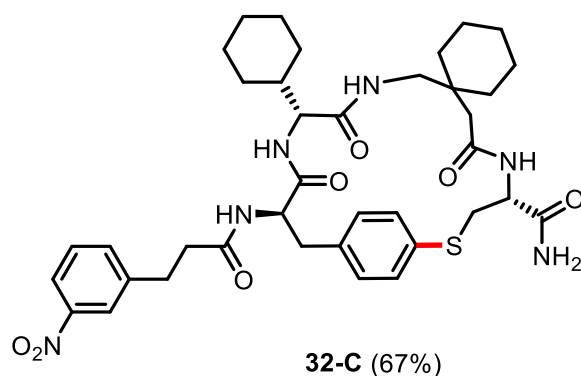

Compound **32-C** was isolated in 67% yield (49 mg) as a white powder under the general condition A.

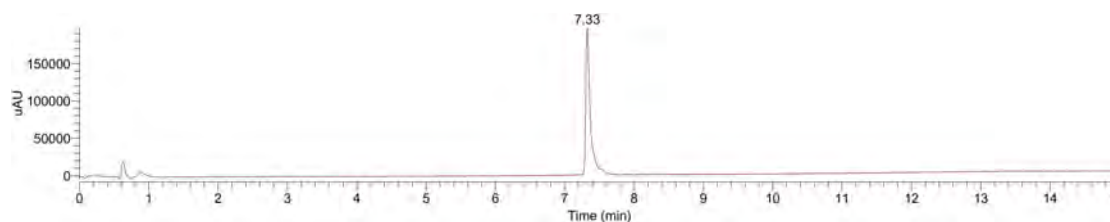

$t_R = 7.33$  min, 5% to 95% B for 10 min, then 95% B 10-15 min,  $\lambda = 254$  nm

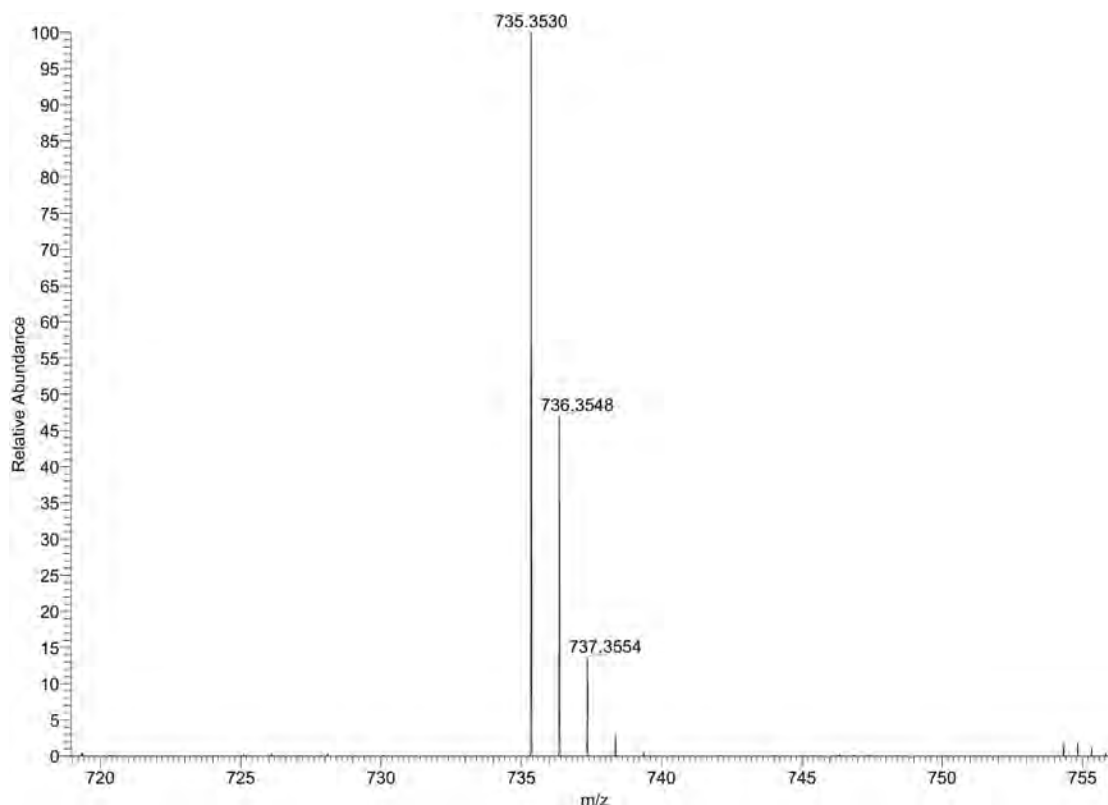

**HRMS:** Calcd for  $C_{38}H_{50}N_6O_7S$   $[M+H]^+$ : 735.3534; found: 735.3530

**$^1H$  NMR (400 MHz, MeOD)**  $\delta$  8.30 (t,  $J = 6.6$  Hz, 1H), 8.13-8.07 (m, 1H), 7.72-7.65 (m, 1H), 7.57 (t,  $J = 7.8$  Hz, 1H), 7.31-7.23 (m, 2H), 7.02 (d,  $J = 8.2$  Hz, 2H), 4.59 (t,  $J = 5.0$  Hz, 1H), 4.47 (dd,  $J = 11.6, 3.2$  Hz, 1H), 4.06 (d,  $J = 8.8$  Hz, 1H), 3.69 (dd,  $J = 14.2, 3.2$  Hz, 1H), 3.48 (dd,  $J = 14.2, 6.0$  Hz, 1H), 3.21-3.06 (m, 4H), 2.97 (dd,  $J = 14.2, 11.8$  Hz, 1H), 2.82-2.68 (m, 3H), 2.22-2.00 (m, 3H), 1.66 (d,  $J = 9.4$  Hz, 2H), 1.64-1.56 (m, 3H), 1.55-1.35 (m, 9H), 1.32 (s, 2H), 1.16 (d,  $J = 15.4$  Hz, 3H), 1.06-0.94 (m, 1H), 0.93-0.85 (m, 1H), 0.81 (t,  $J = 11.6$  Hz, 1H).

**$^{13}C$  NMR (101 MHz, MeOD)**  $\delta$  175.42, 174.71, 174.19, 174.02, 171.85, 149.86, 144.52, 137.43, 136.12, 135.87, 132.75, 130.97, 130.91, 130.87, 124.13, 122.50, 59.01, 56.62, 55.88, 41.11, 39.43, 38.41, 37.78, 37.64, 35.42, 35.20, 31.97, 30.84, 30.82, 30.01, 27.20, 27.10, 26.79, 22.66, 22.62.

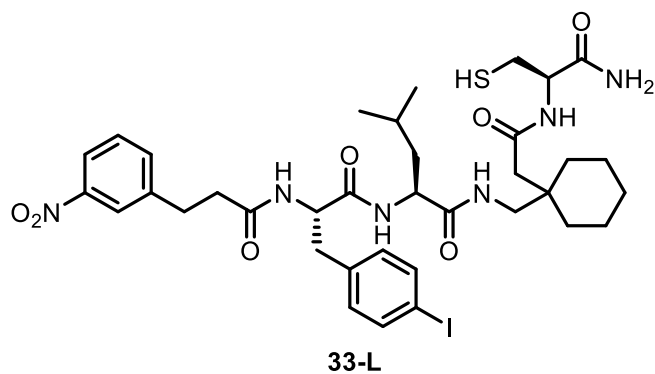

Compound **33-L** was prepared as a white solid in 85% yield from **Rink-amide AM resin** following the SPPS procedure.

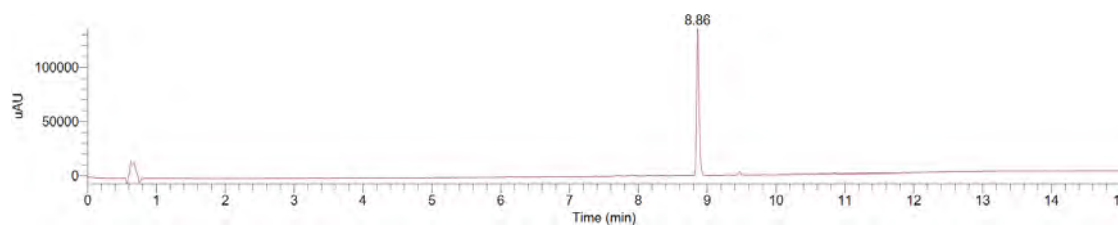

$t_R = 8.86$  min, 5% to 95% B for 10 min, then 95% B 10-15 min,  $\lambda = 254$  nm

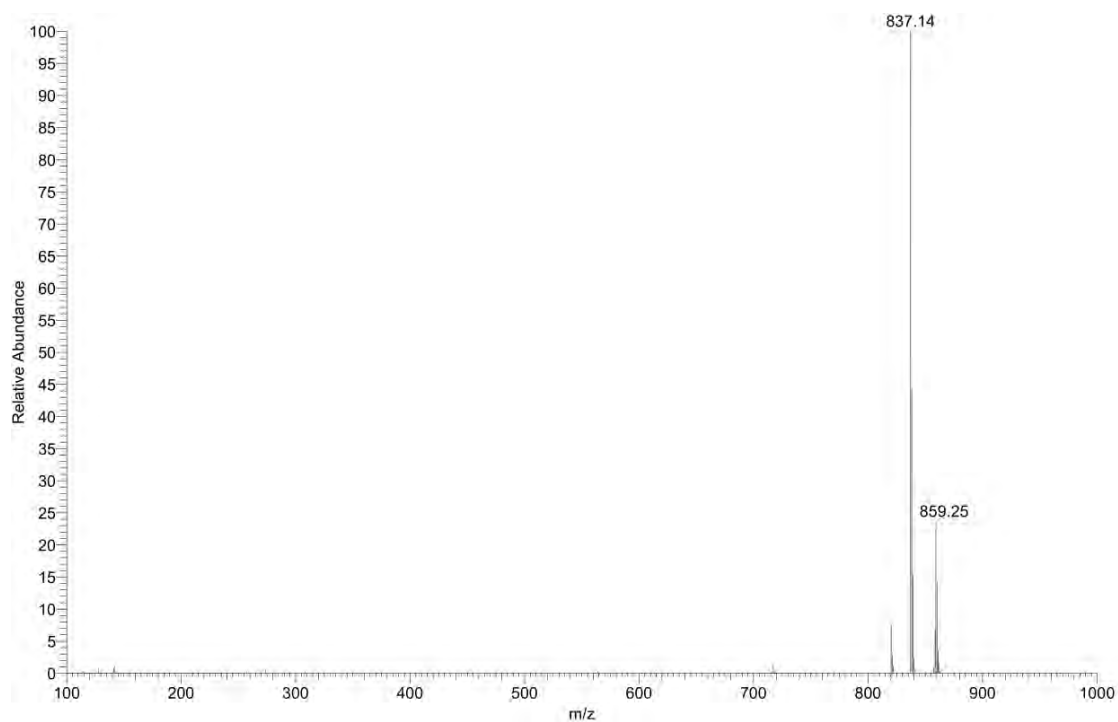

**LRMS:**  $[M+H]^+$  837.14;  $[M+Na]^+$  859.25.

**<sup>1</sup>H NMR (400 MHz, MeOD)**  $\delta$  8.17-8.03 (m, 2H), 7.65-7.59 (m, 3H), 7.53 (t,  $J = 7.8$  Hz, 1H), 7.02-7.97 (m, 2H), 4.61-4.42 (m, 2H), 4.17 (dd,  $J = 11.2, 4.0$  Hz, 1H), 3.38-3.31 (m, 2H), 3.27 (d,  $J = 4.2$  Hz, 2H), 3.13-2.99 (m, 2H), 2.97-2.87 (m, 3H), 2.82 (dd,  $J = 13.8, 7.8$  Hz, 1H), 2.60 (t,  $J = 7.4$  Hz, 2H), 2.22 (s, 2H), 1.60-1.45 (m, 6H), 1.44-1.34 (m, 5H), 0.86 (d,  $J = 6.0$  Hz, 3H), 0.75 (d,  $J = 6.0$  Hz, 3H).

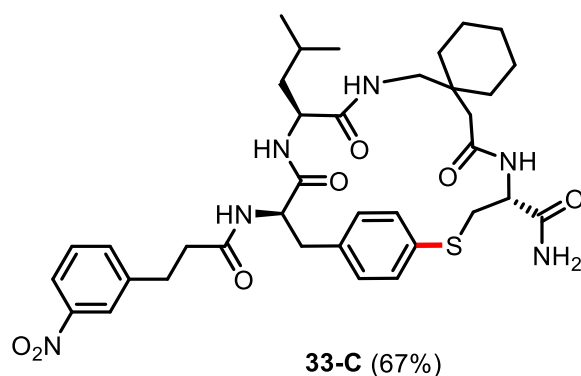

Compound **33-C** was isolated in 67% yield (47 mg) as a white powder under the general condition A.

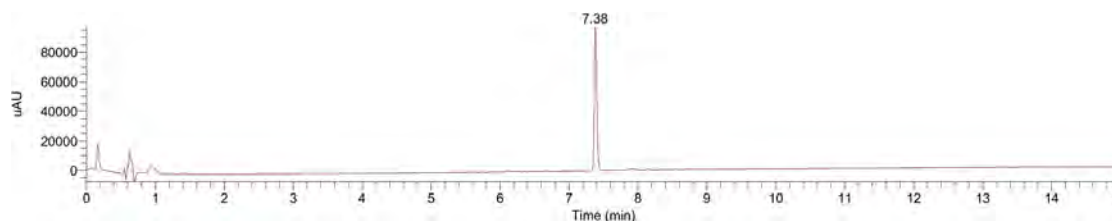

$t_R = 7.38$  min, 5% to 95% B for 10 min, then 95% B 10-15 min,  $\lambda = 254$  nm

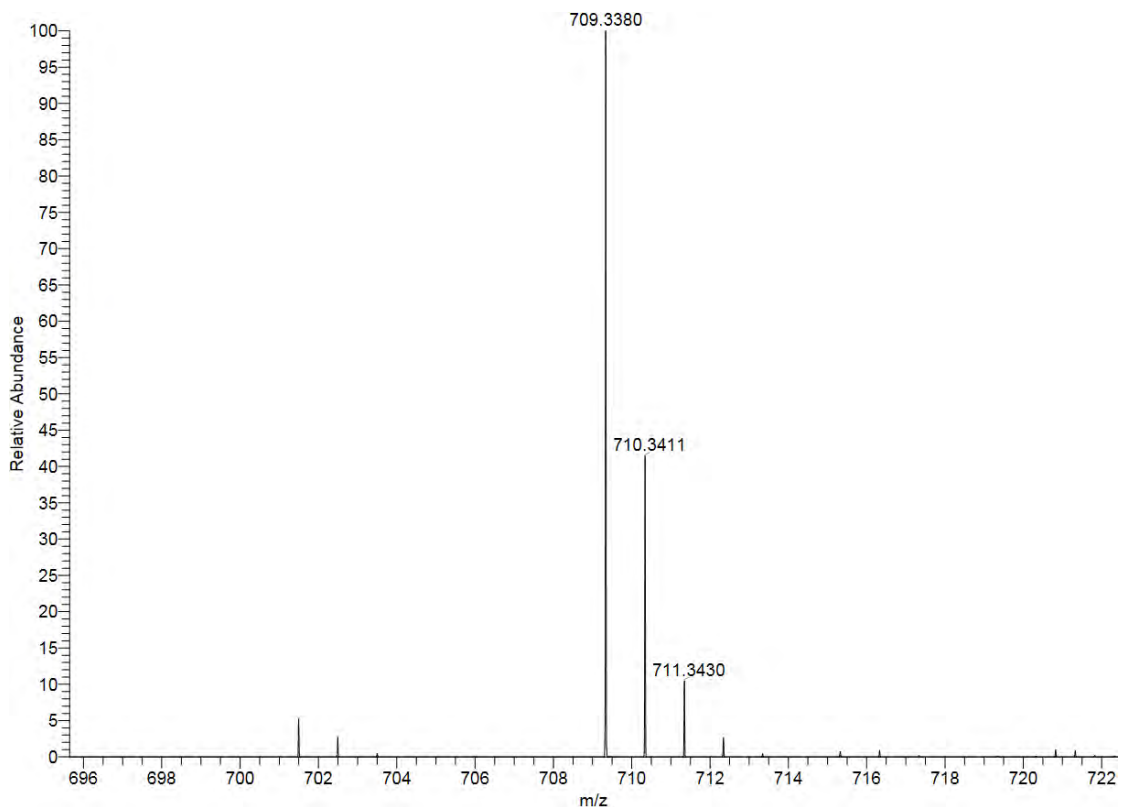

**HRMS:** Calcd for  $C_{38}H_{50}N_6O_7S$   $[M+H]^+$ : 709.3378; found: 709.3380.

**$^1H$  NMR (400 MHz, MeOD)**  $\delta$  8.20-8.12 (m, 1H), 8.11-8.02 (m, 1H), 7.68 (dd,  $J = 8.2, 4.4$  Hz, 1H), 7.61-7.49 (m, 1H), 7.31-7.23 (m, 2H), 7.00 (d,  $J = 7.6$  Hz, 2H), 4.65 (q,  $J = 5.2$  Hz, 1H), 4.61-4.50 (m, 1H), 4.38-4.28 (m, 1H), 3.61 (dd,  $J = 14.4, 3.4$  Hz, 1H), 3.35 (s, 1H), 3.32-3.26 (m, 1H), 3.24-3.16 (m, 1H), 3.13-3.05 (m, 2H), 3.03-2.92 (m, 1H), 2.81-2.69 (m, 3H), 2.11-1.97 (m, 2H), 1.58-1.38 (m, 8H), 1.38-1.22 (m, 5H), 0.92-0.78 (m, 6H).

**$^{13}C$  NMR (101 MHz, MeOD)**  $\delta$  173.89, 173.70, 173.02, 172.78, 170.25, 148.41, 143.16, 135.49, 134.78, 131.70, 129.71, 129.46, 122.81, 121.09, 54.82, 54.45, 51.35, 40.94, 37.90, 37.03, 36.50, 33.86, 30.55, 25.71, 24.40, 21.83, 21.02.

## 5. The structure of Headpiece and AOP-headpiece

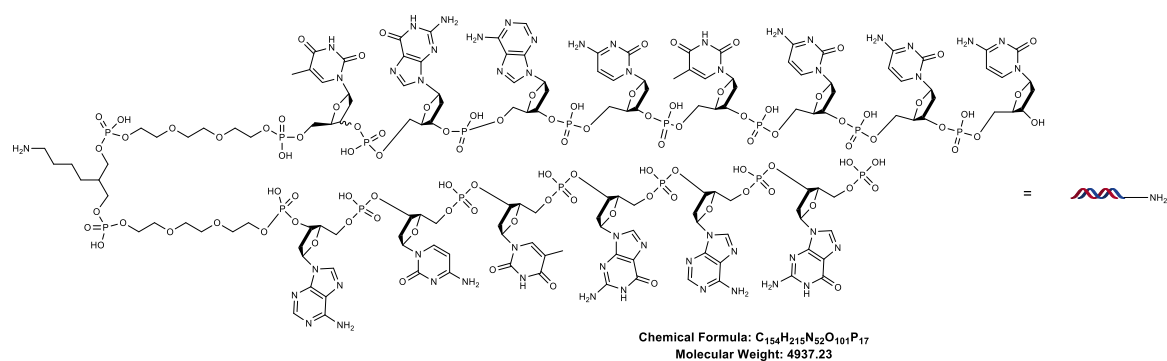

Scheme S7. The structure of Headpiece

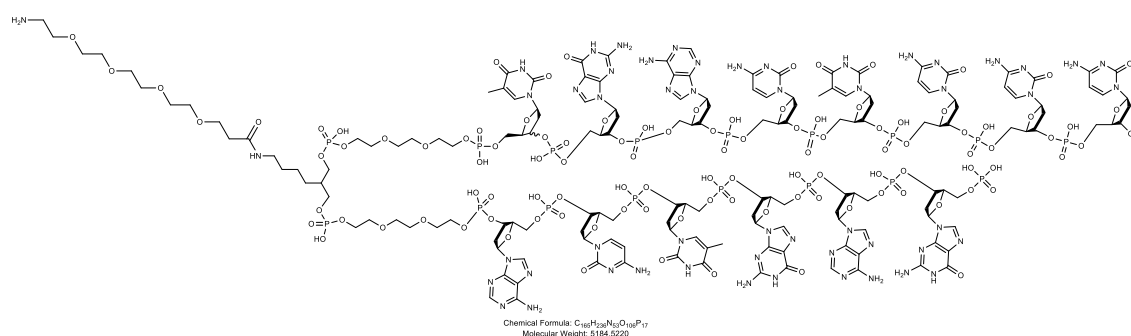

Scheme S8. The structure of AOP-headpiece

## 6. DNA-compatible reaction general protocols

### On-DNA amidation reaction

#### Materials

oligonucleotide: 2 mM in water

pH 9.4 borate buffer: 500 mM in water

Amino Acid : 200 mM in DMA

HATU: 200 mM in DMA

DIPEA: 200 mM in DMA

#### Procedure

- 1) Premix solution: Amino Acids (67 equiv, 670 nmol, 3.4  $\mu$ L), HATU (67 equiv, 670 nmol, 3.4  $\mu$ L) and DIPEA (67 equiv, 670 nmol, 3.4  $\mu$ L).
- 2) To the headpiece solution (10 nmol, 5  $\mu$ L), was added 5  $\mu$ L pH 9.4 buffer solution and 6  $\mu$ L premix solution. The mixture was vortexed and react at room temperature for 10 min, then was added 4  $\mu$ L premix solution. The mixture was vortexed and react at room temperature for 1 h.
- 3) Add 5 M NaCl solution (10 % by volume) and cold ethanol (2.5 times by volume,



ethanol stored at -20 °C). The mixture was stored at a -80 °C freezer for more than 30 minutes.

- 4) Centrifuge the sample for around 30 minutes at 4 °C in a microcentrifuge at 10000 rpm. The above supernatant was removed and the pellet (precipitate) was cooled in liquid nitrogen and then placed on a lyophilizer. After lyophilization, the dry pellet was recovered.

### **On-DNA de-Fmoc reaction**

#### **Materials**

oligonucleotide: 1 mM in water

piperidine

#### **Procedure**

- 1) To the peptide-linked DNA (5 nmol, 5  $\mu$ L), was added 0.5  $\mu$ L piperidine. The mixture was vortexed and react at room temperature for 1 h.
- 2) Add 5 M NaCl solution (10 % by volume) and cold ethanol (2.5 times by volume, ethanol stored at -20 °C). The mixture was stored at a -80 °C freezer for more than 30 minutes.
- 3) Centrifuge the sample for around 30 minutes at 4 °C in a microcentrifuge at 10000 rpm. The above supernatant was removed and the pellet (precipitate) was cooled in liquid nitrogen and then placed on a lyophilizer. After lyophilization, the dry pellet was recovered.

### **On-DNA de-Mmt protection reaction**

#### **Materials**

oligonucleotide: 1 mM in water

MgCl<sub>2</sub>: 400 mM in water

pH 5.5 phosphate buffer: 500 mM in water

#### **Procedure**

- 1) To the peptide-linked DNA (5 nmol, 5  $\mu$ L), was added the solution of MgCl<sub>2</sub> (400 equiv, 5  $\mu$ L) and pH 5.5 phosphate buffer (500 equiv, 5  $\mu$ L). The mixture was vortexed.
- 2) The solution was reacted at 80 °C for 10 h.
- 3) Add 5 M NaCl solution (10 % by volume) and cold ethanol (2.5 times by volume, ethanol stored at -20 °C). The mixture was stored at a -80 °C freezer for more than 30 minutes.

- 4) Centrifuge the sample for around 30 minutes at 4 °C in a microcentrifuge at 10000 rpm. The above supernatant was removed and the pellet (precipitate) was cooled in liquid nitrogen and then placed on a lyophilizer. After lyophilization, the dry pellet was recovered.

## On-DNA S-arylation reaction

### Materials

oligonucleotide: 1 mM in water

xantphosPdG3: 5 mM in ACN

DIPEA: 200 mM in ACN

### Procedure

- 1) To the peptide-linked DNA (5 nmol, 5  $\mu$ L), was added the solution of Pd catalysis (1 equiv, 1  $\mu$ L) and DIPEA (100 equiv, 2.5  $\mu$ L). The mixture was vortexed.
- 2) The mixture was reacted at room temperature for 1 h.
- 3) Add 5 M NaCl solution (10 % by volume) and cold ethanol (2.5 times by volume, ethanol stored at -20 °C). The mixture was stored at a -80 °C freezer for more than 30 minutes.
- 4) Centrifuge the sample for around 30 minutes at 4 °C in a microcentrifuge at 10000 rpm. The above supernatant was removed and the pellet (precipitate) was cooled in liquid nitrogen and then placed on a lyophilizer. After lyophilization, the dry pellet was recovered.

## 7. Synthetic routes and mass spectrums

### DNA-linked compound 29

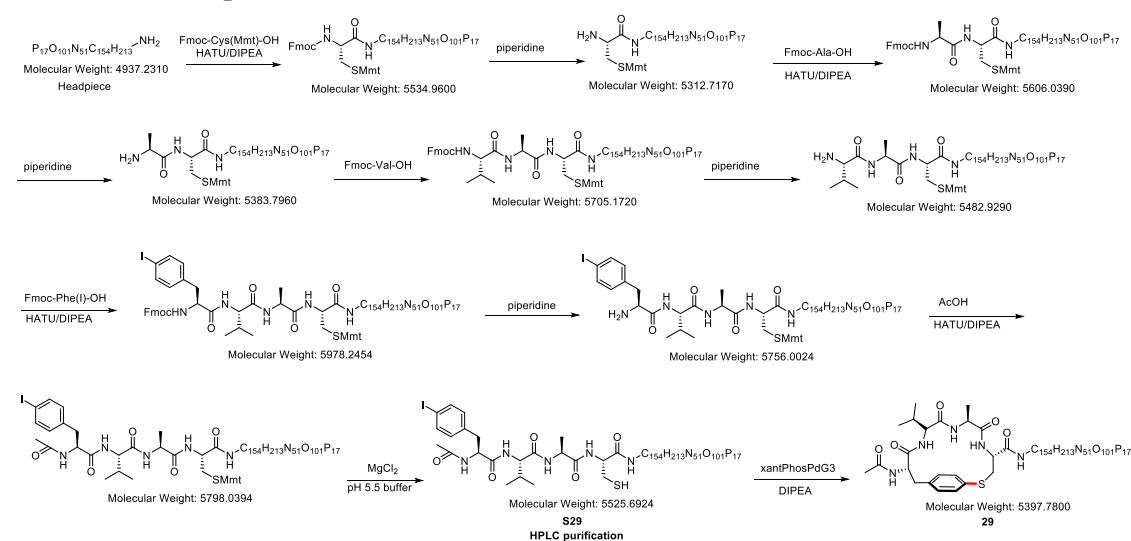

Mass spectrum of S29

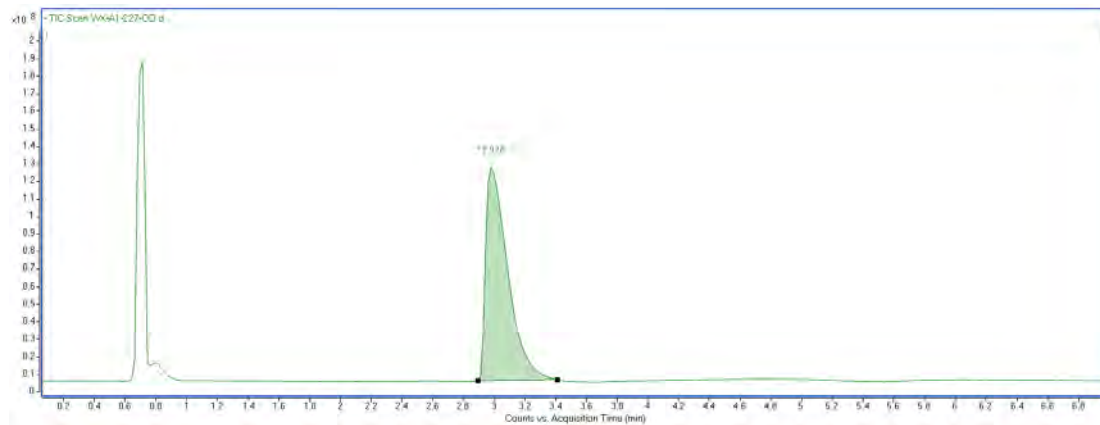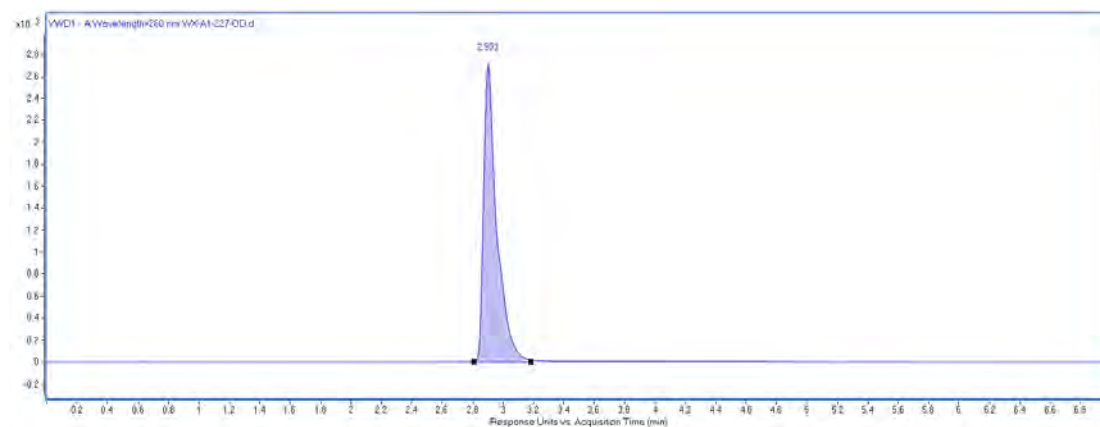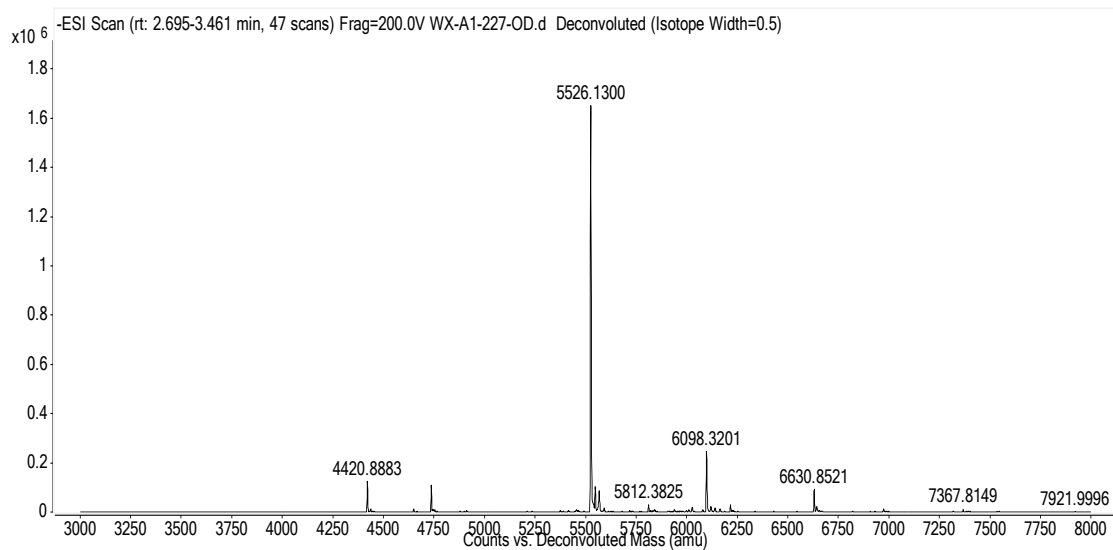

Mass spectrum of 29 and 30

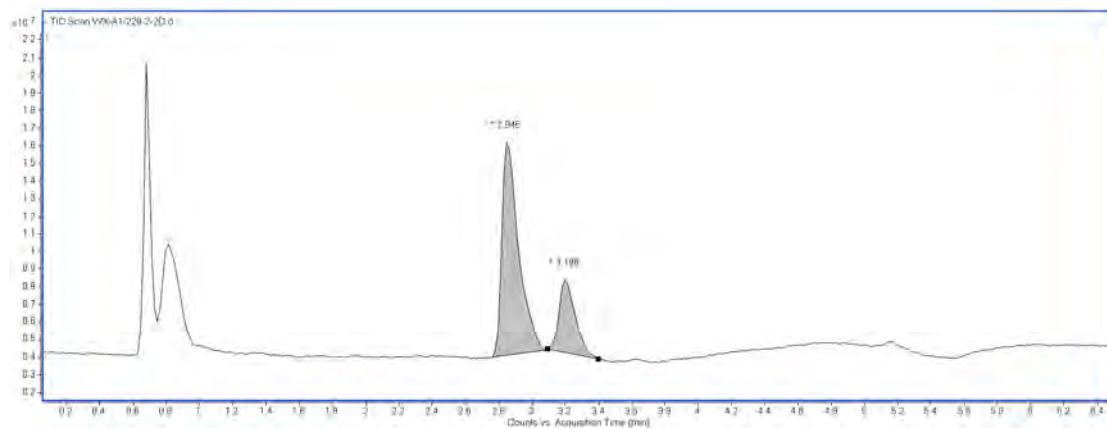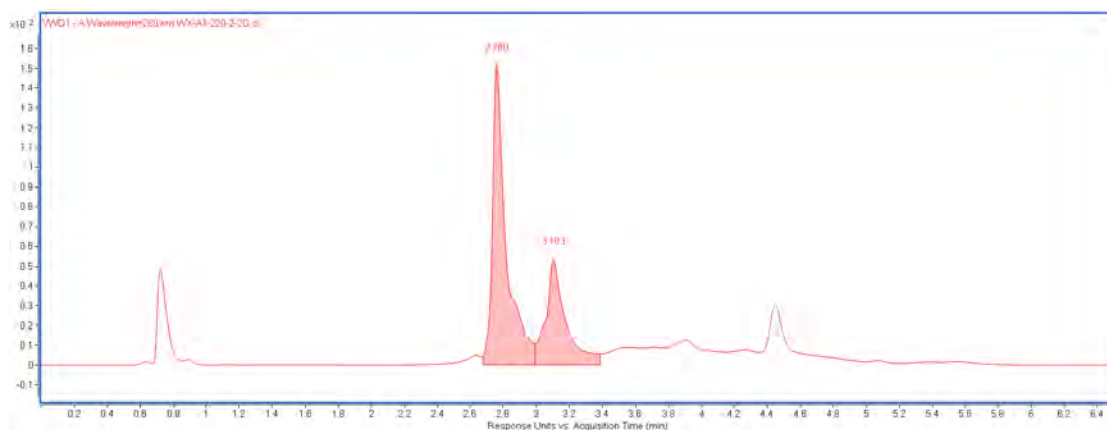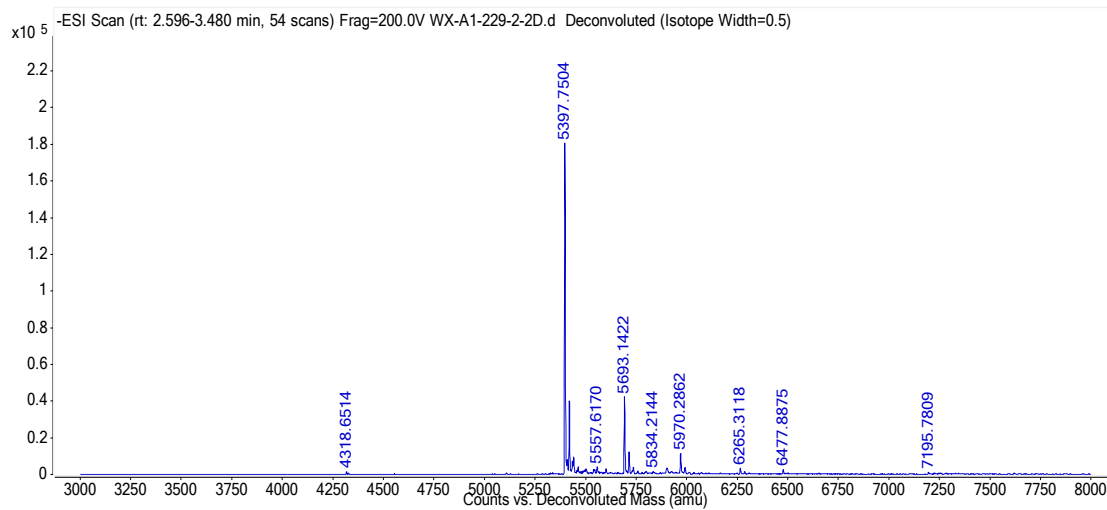

### DNA-linked compound 31

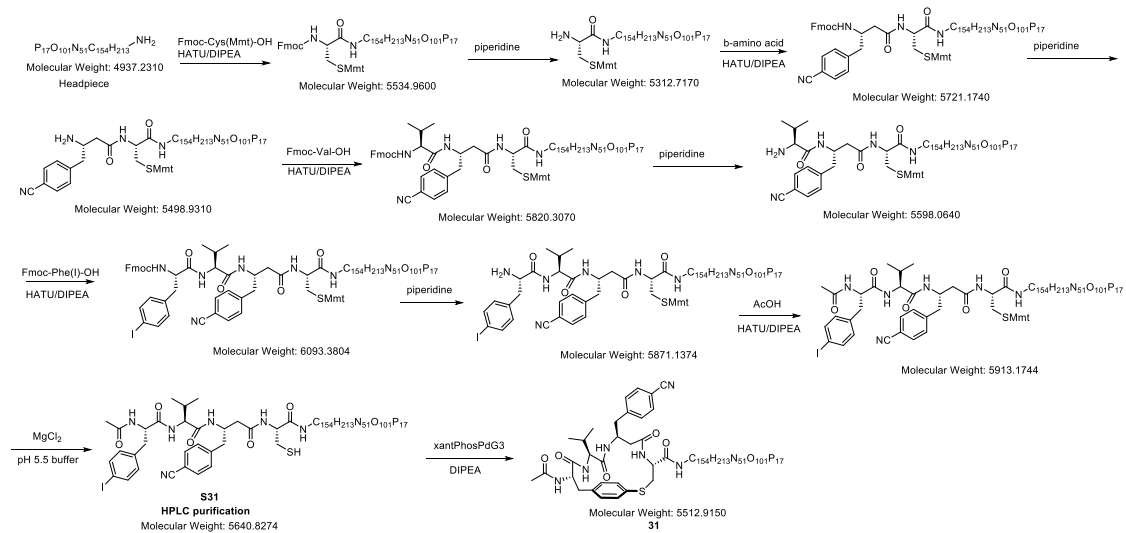

## Mass spectrum of S31

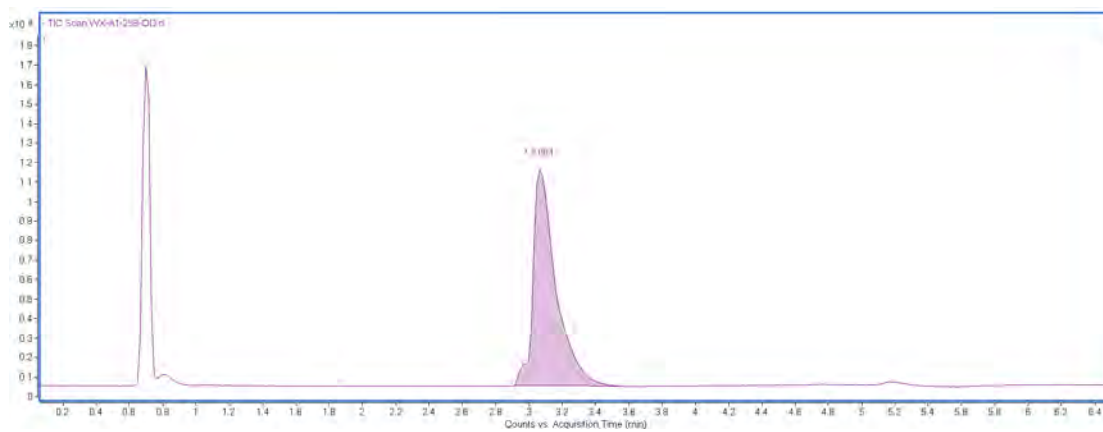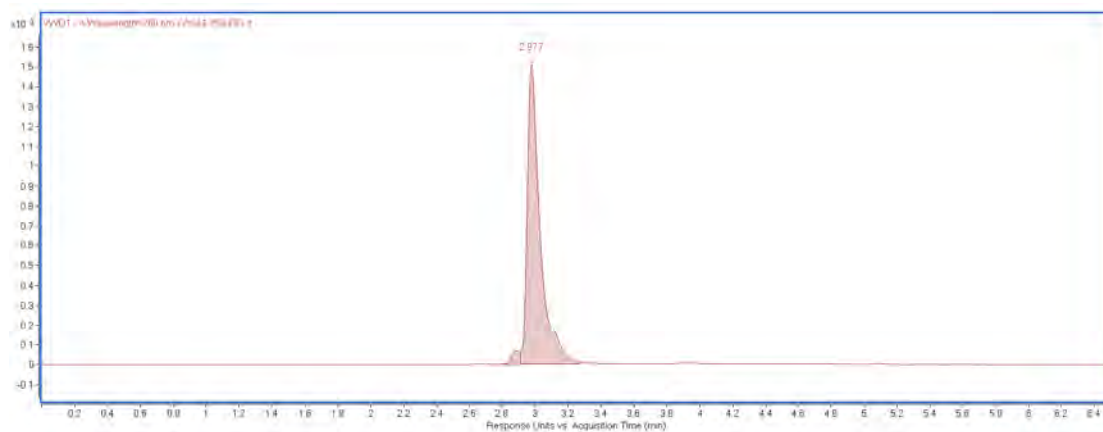

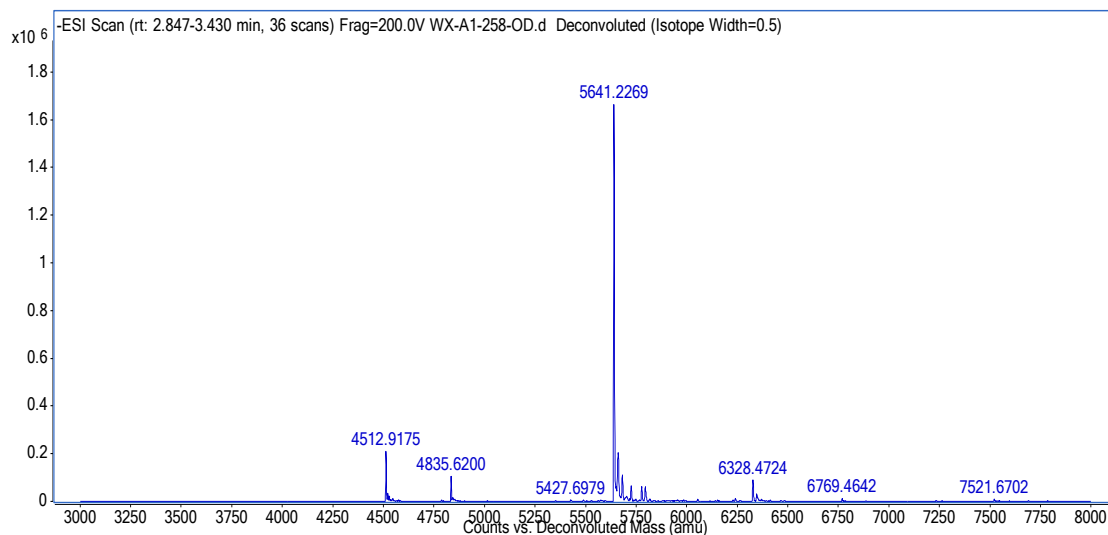

Mass spectrum of 31

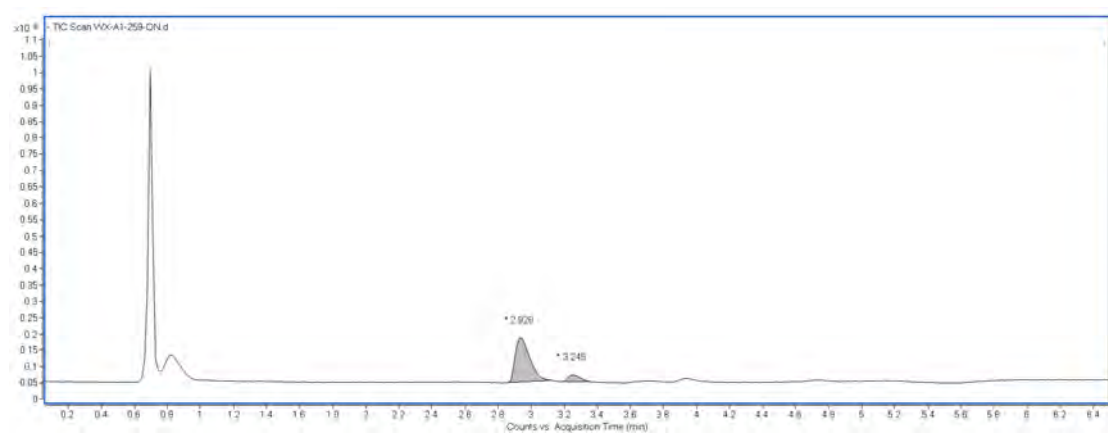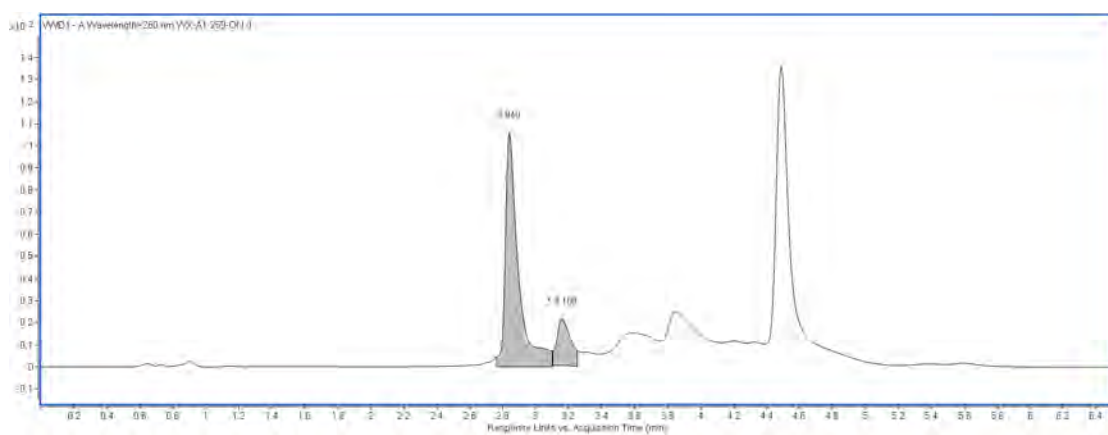

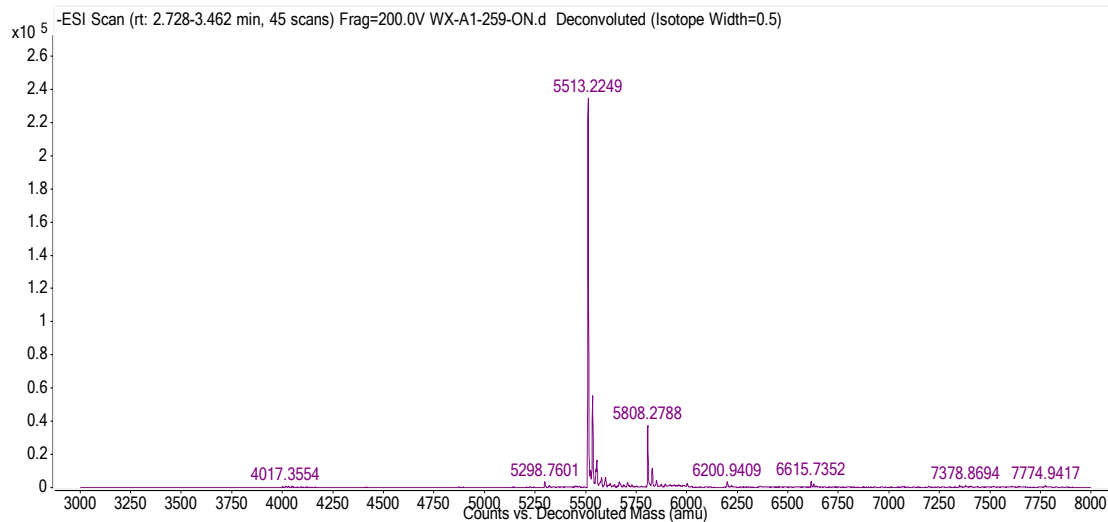

### DNA-linked compound 32

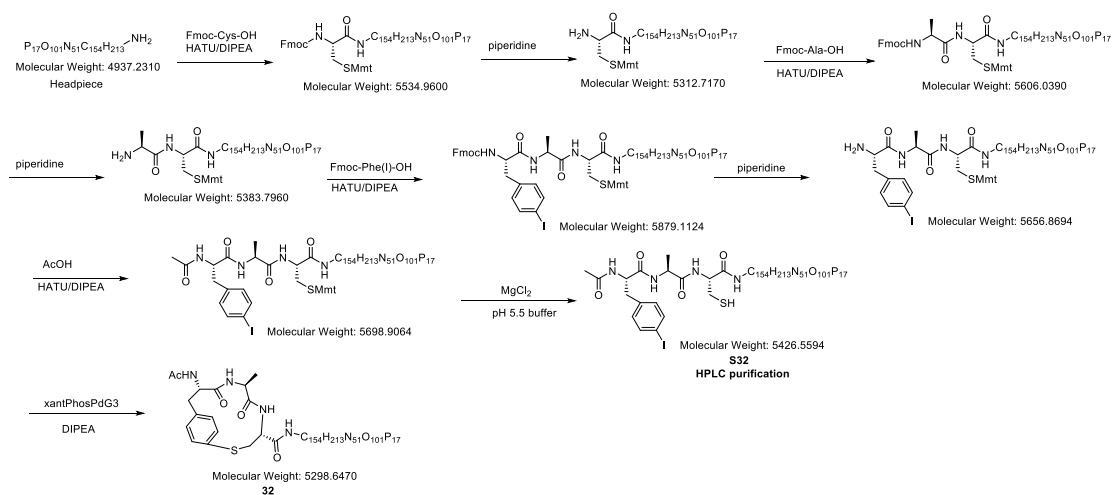

### Mass spectrum of S32

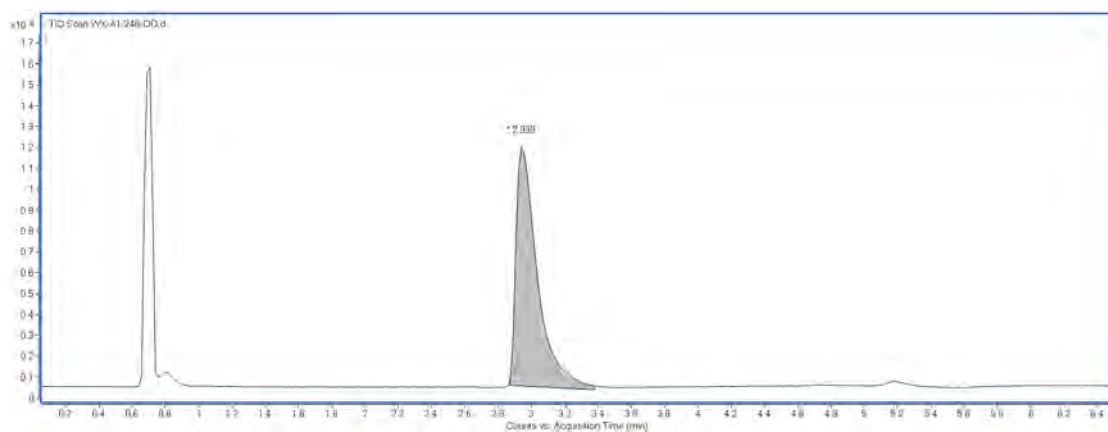

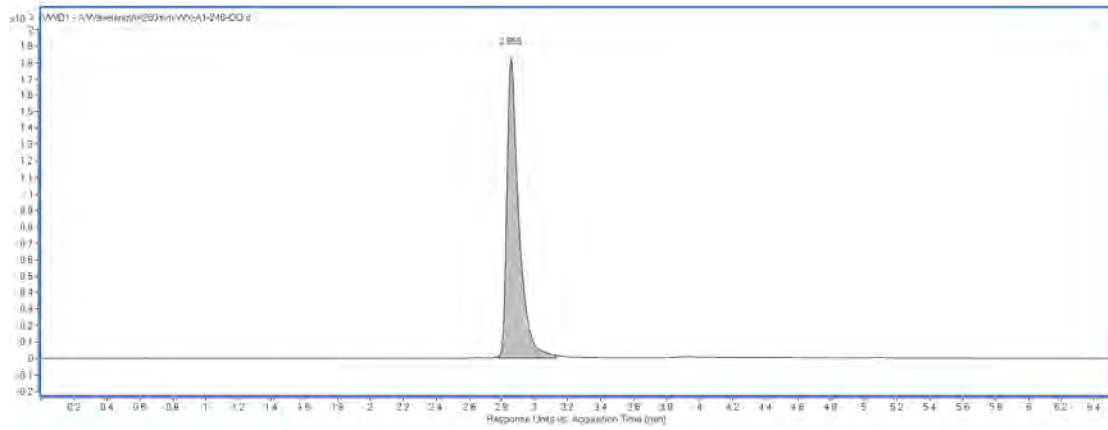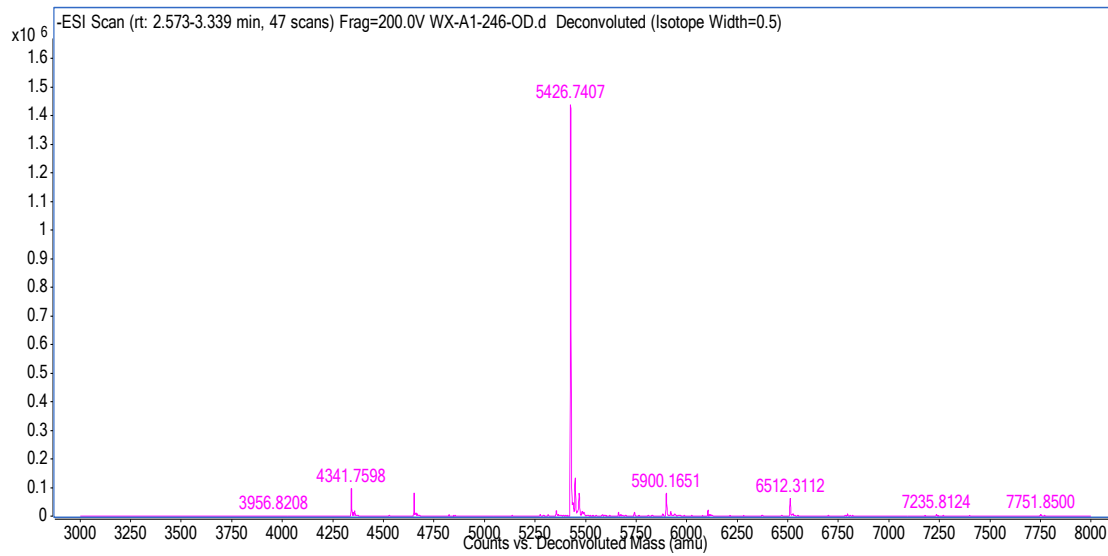

Mass spectrum of 32

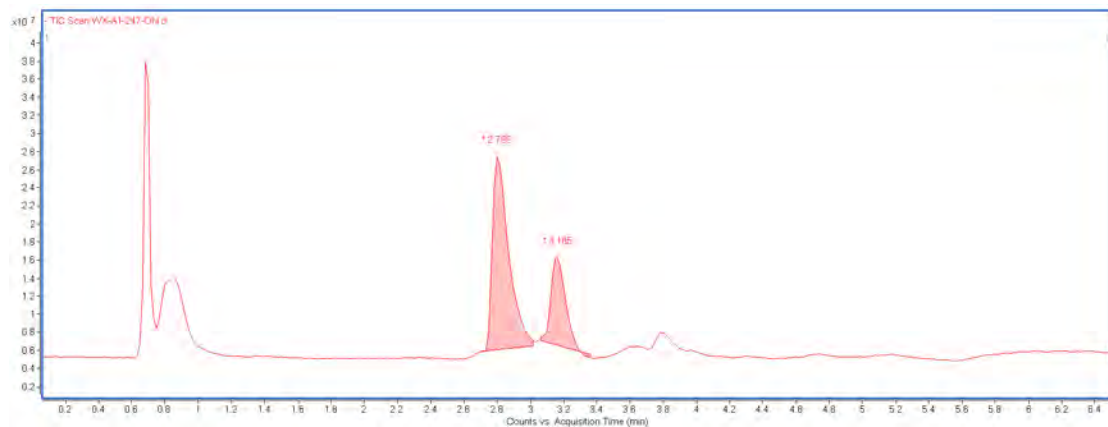



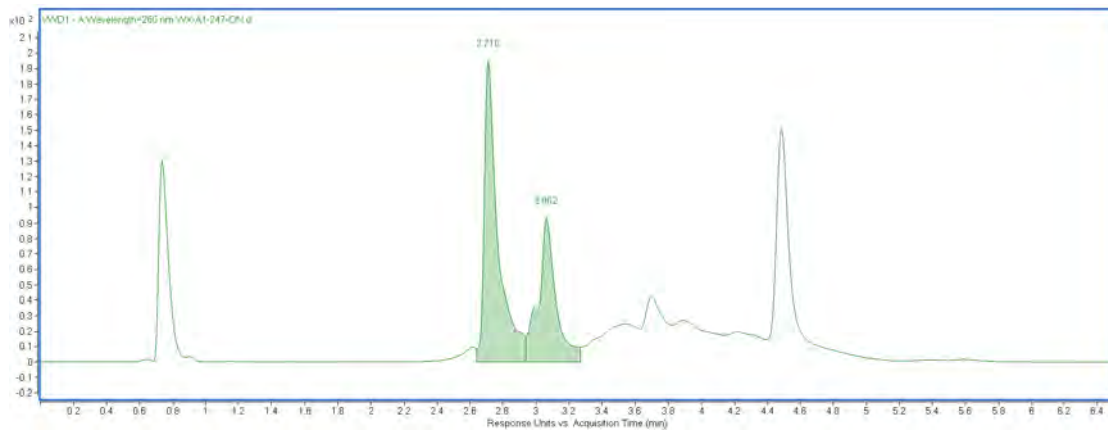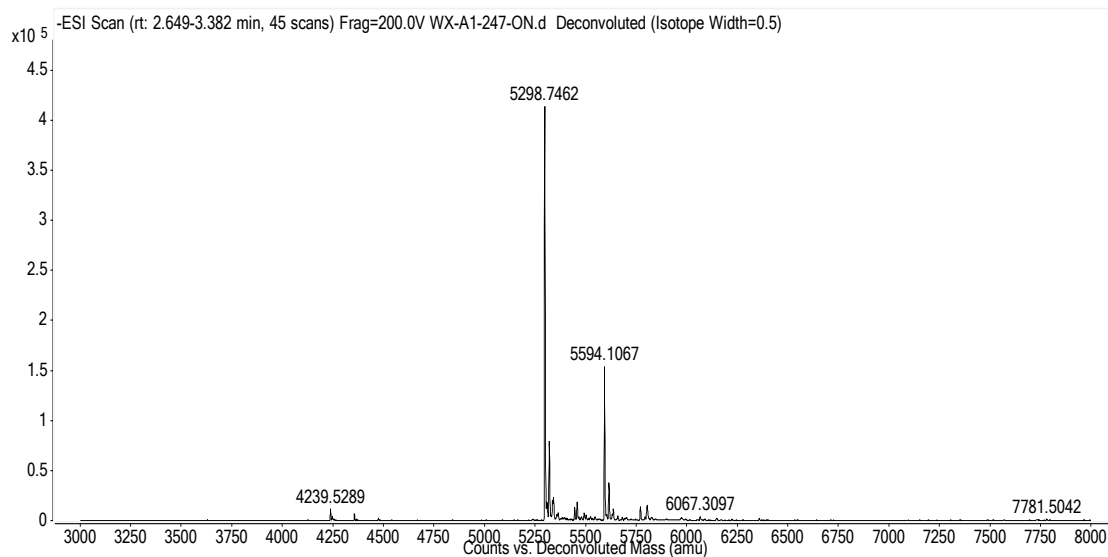

### DNA-linked compound 33

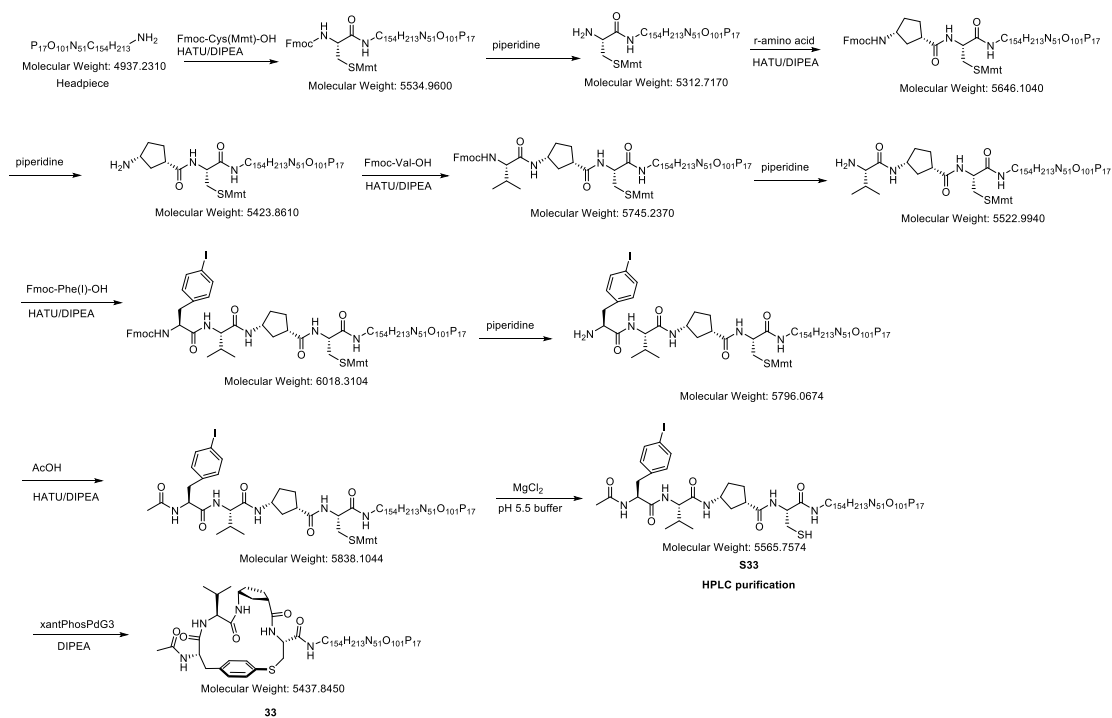

### Mass spectrum of S33

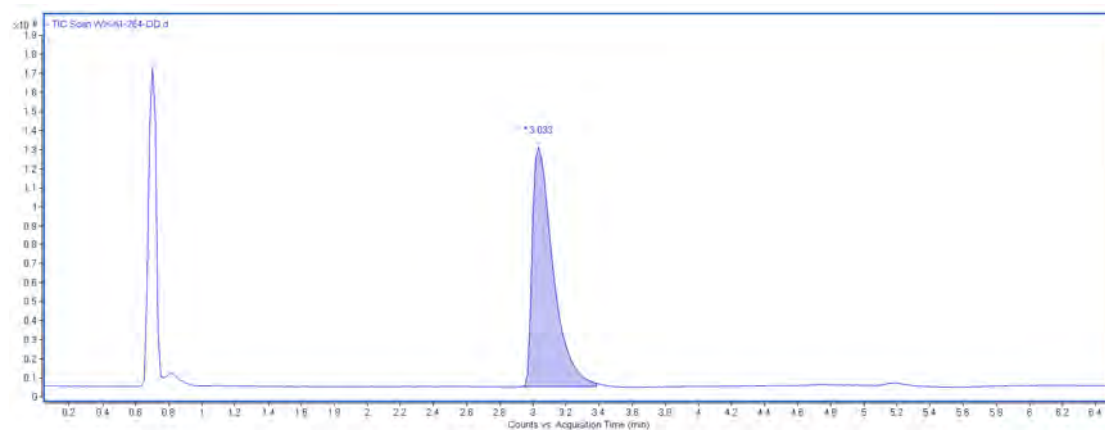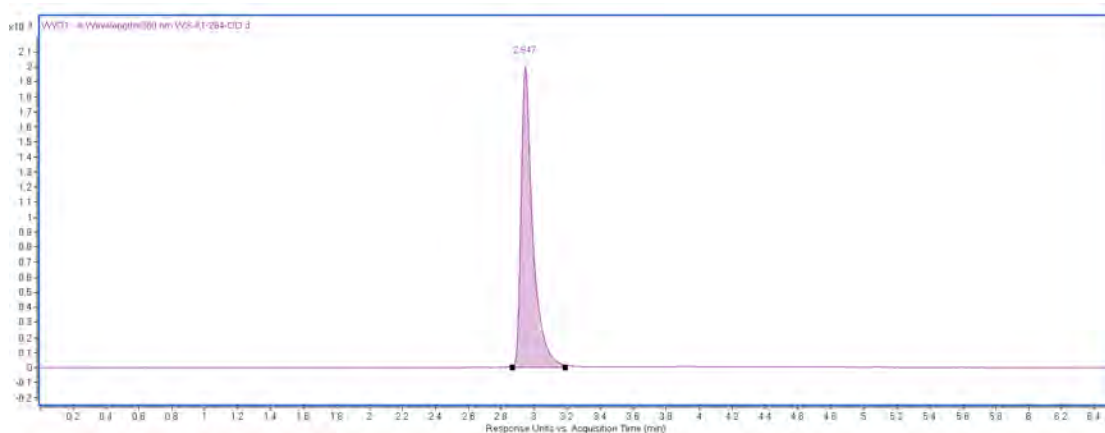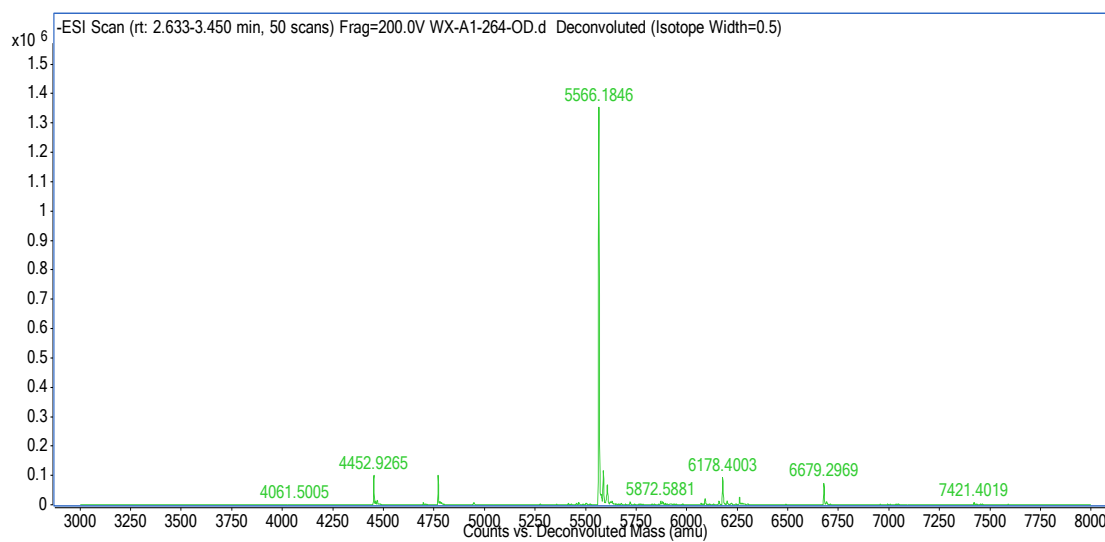

### Mass spectrum of 33

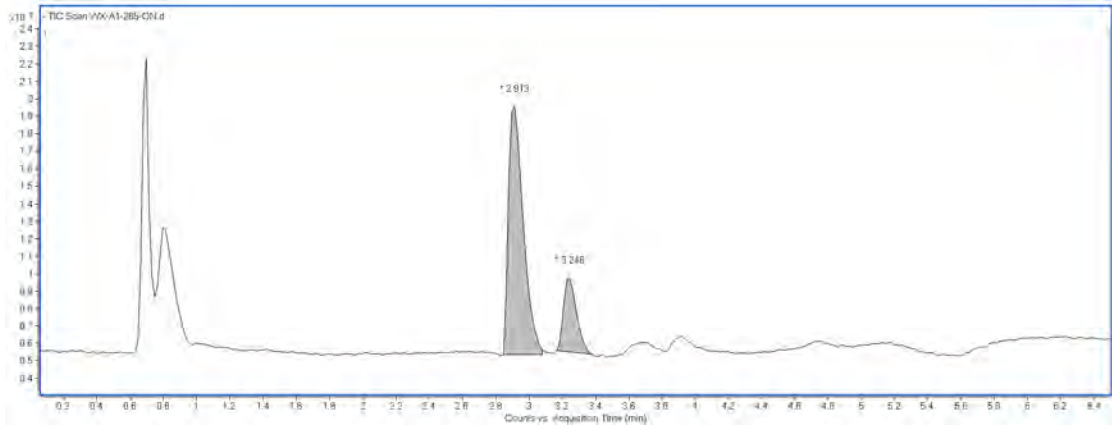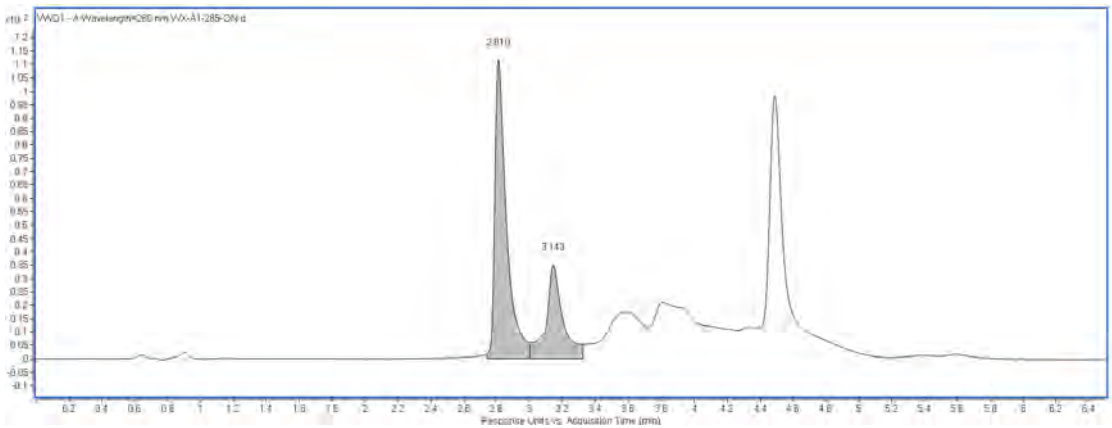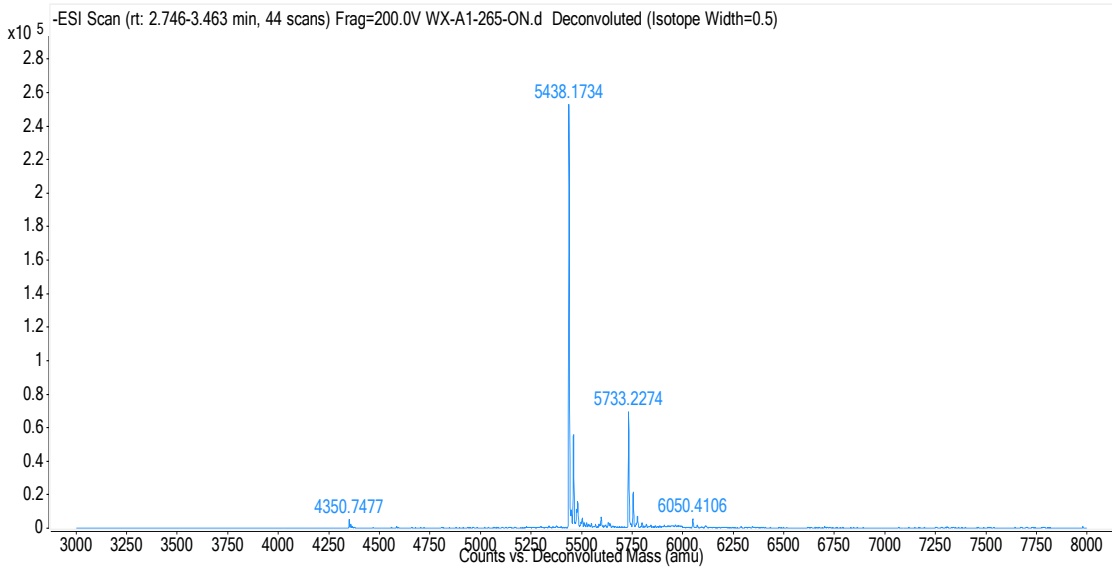

**DNA-linked compound 34**

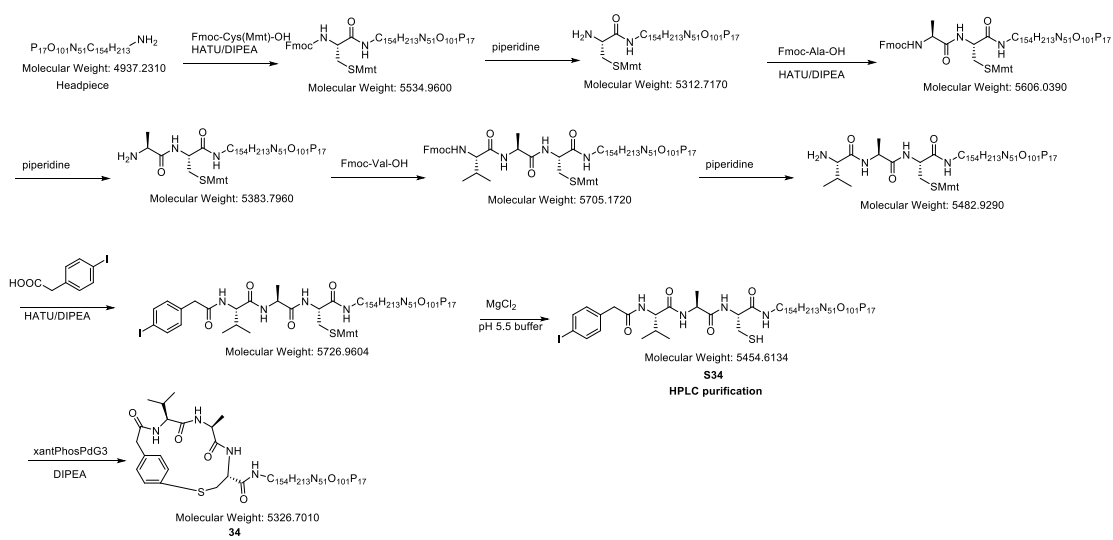

### Mass spectrum of S34

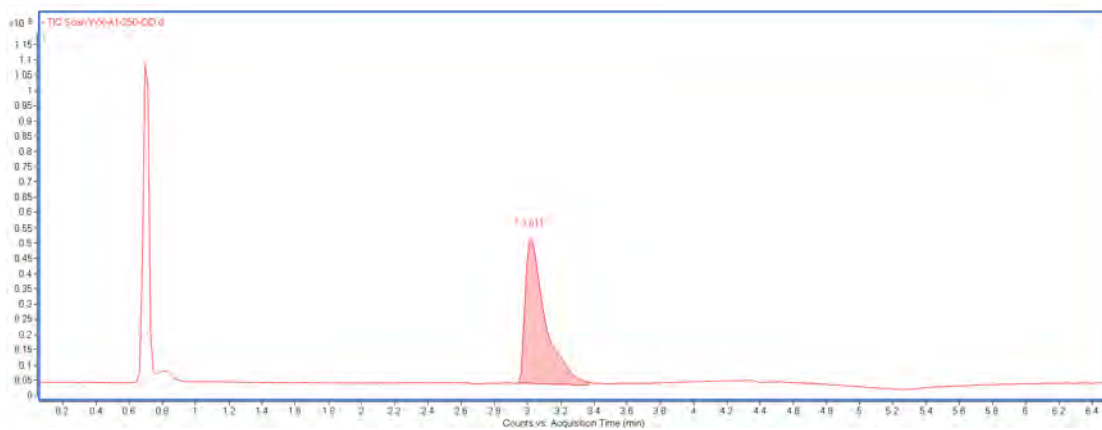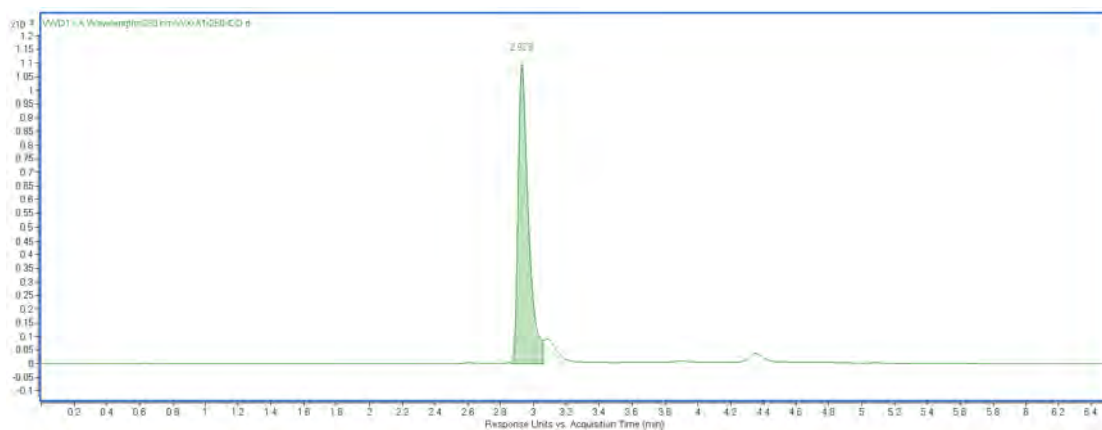

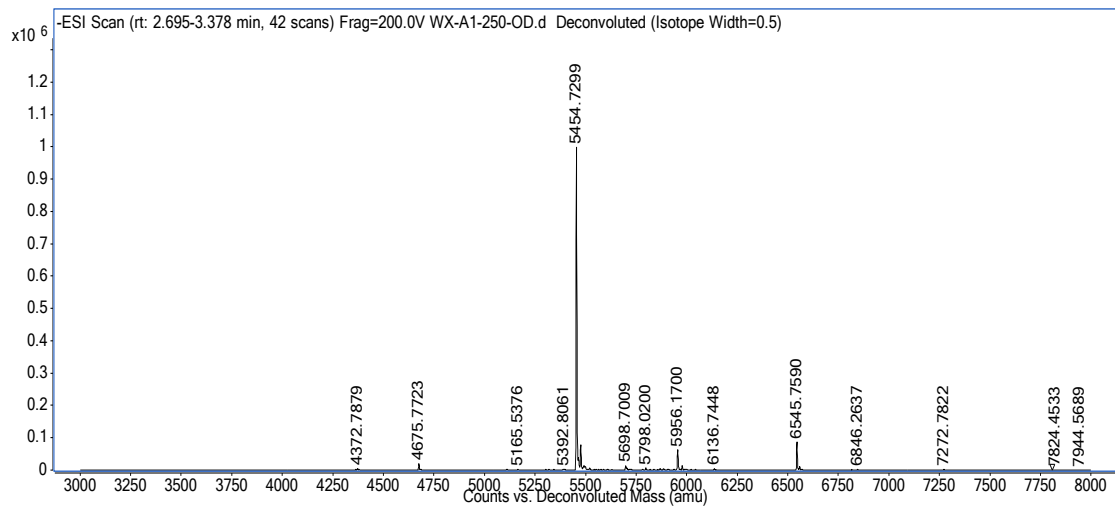

Mass spectrum of 34

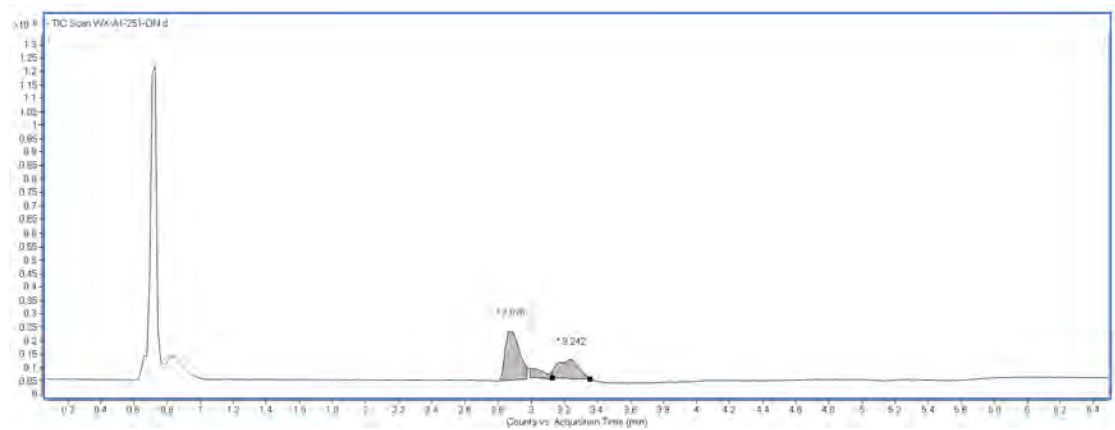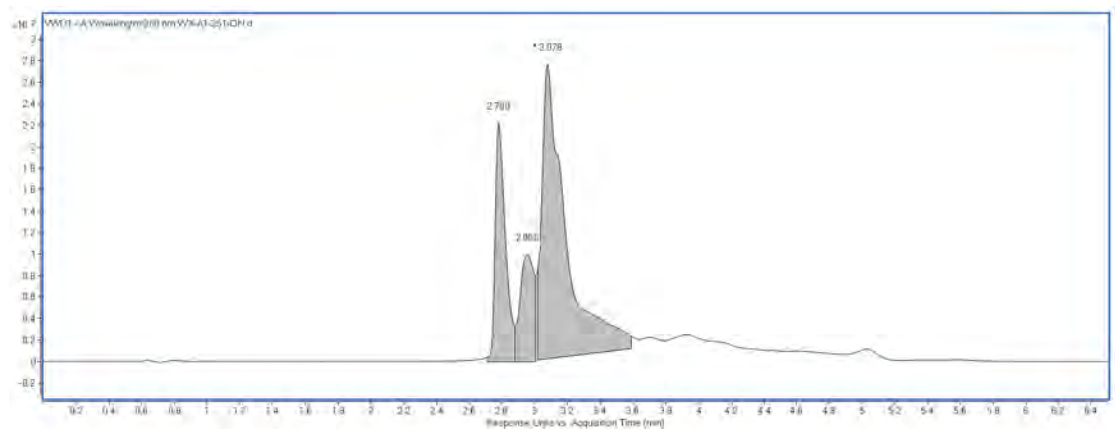

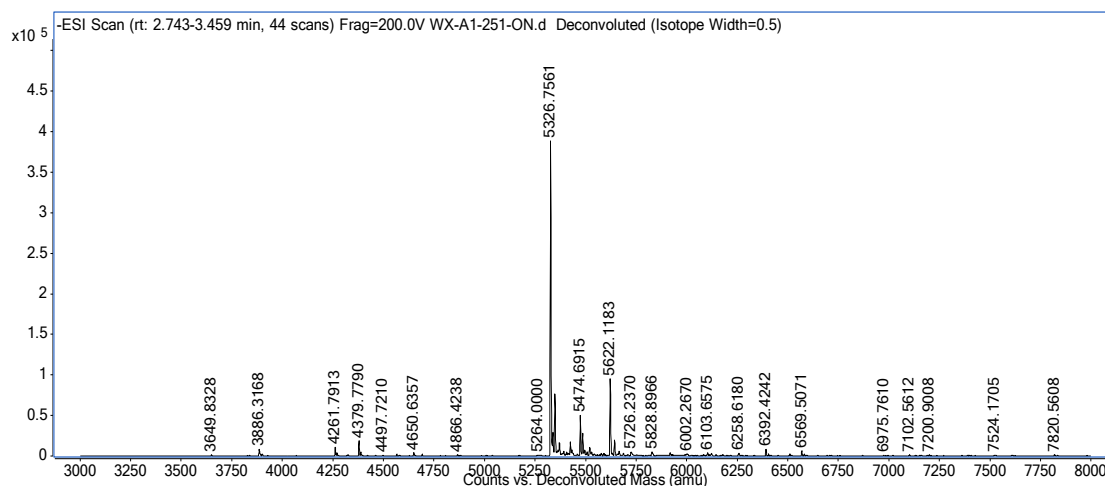

## 8. The construction of DNA-encoded library

Sequence of primer

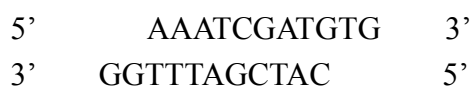

Sequence of the extended headpiece

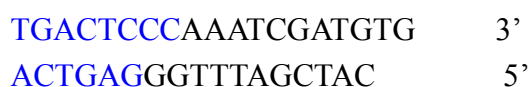

Tags: The DNA tags contained a 11bp coding region, flanked by two 2-base 3' overhangs, all 5'-ends were phosphorylated.

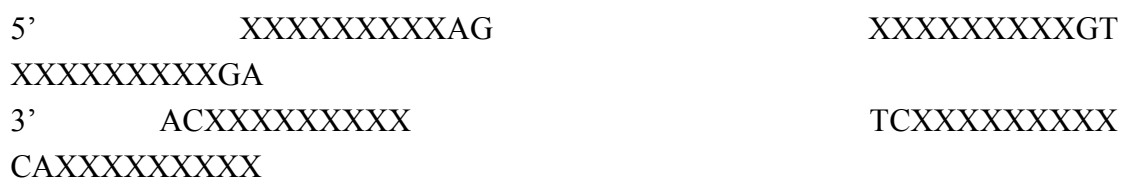

### Primer/tag ligation

#### Materials

AOP-Headpiece: 1 mM in water

Primer/tag: 1.8 mM in water

T4 DNA ligase

T4 ligation buffer

#### Procedure

1) To the AOP-Headpiece solution (5 nmol, 5  $\mu$ L), was added 9.5  $\mu$ L ddH<sub>2</sub>O, 3  $\mu$ L

- primer/tag (1.1 equiv, 5.5 nmol), 2  $\mu$ L T4 buffer and 0.5  $\mu$ L T4 ligase. The mixture was vortexed and incubated at 16 °C for 16 h.
- 2) Add 5 M NaCl solution (10 % by volume) and cold ethanol (2.5 times by volume, ethanol stored at -20 °C). The mixture was stored at a -80 °C freezer for more than 30 minutes.
  - 3) Centrifuge the sample for around 30 minutes at 4 °C in a microcentrifuge at 10000 rpm. The above supernatant was removed and the pellet (precipitate) was cooled in liquid nitrogen and then placed on a lyophilizer. After lyophilization, the dry pellet was recovered.

## 9. Library synthetic route

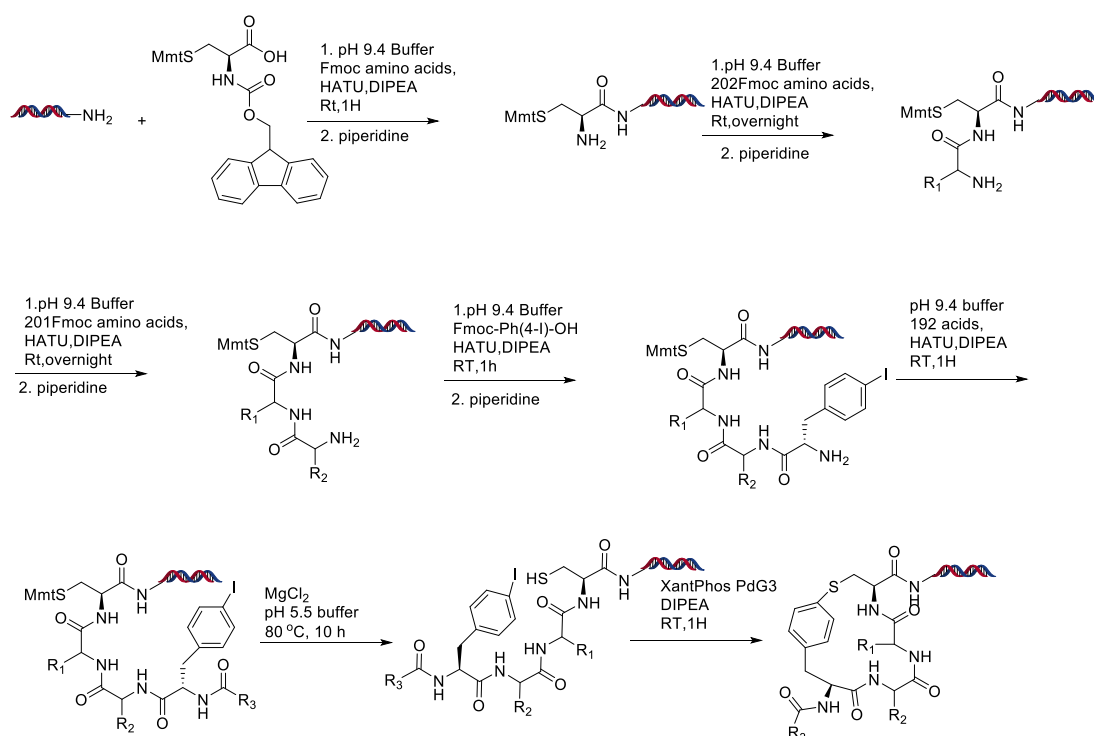

## 10. The synthesis of DNA-encoded library

### Amidation with Fmoc-Cys(Mmt)-OH

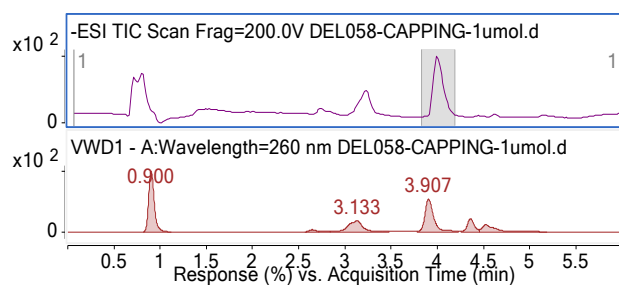

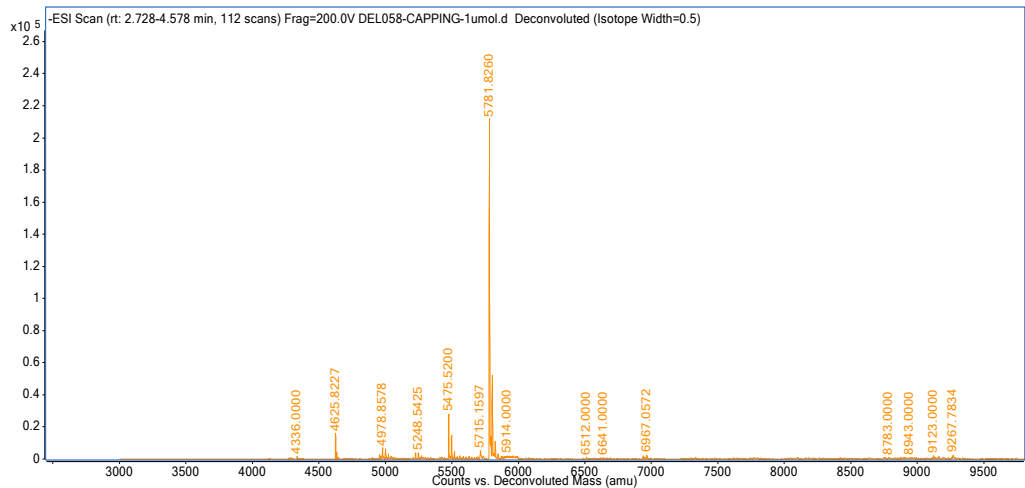

## De-Fmoc

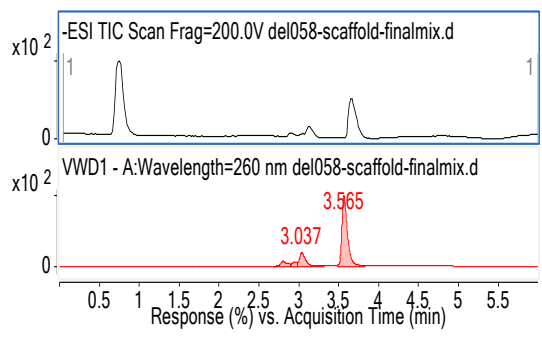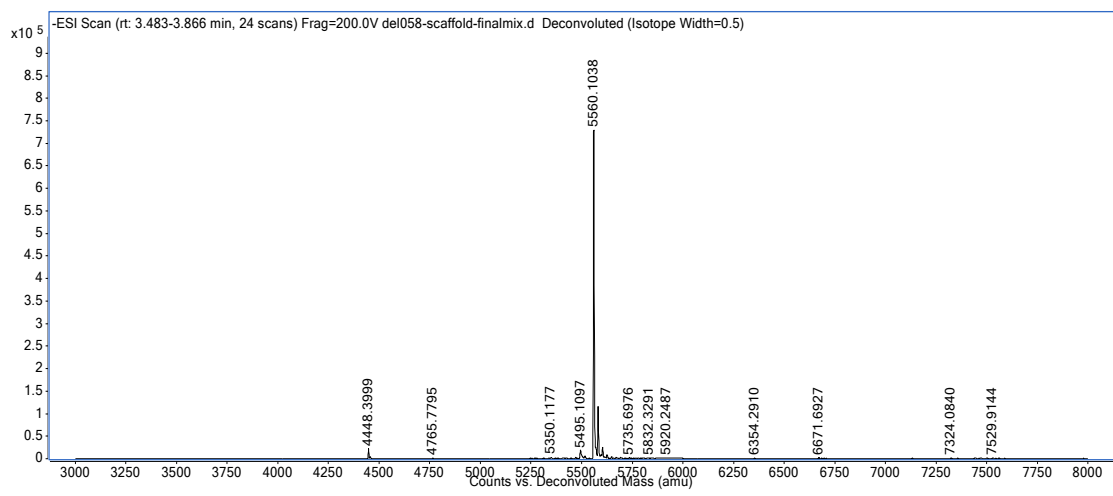

## Primer ligation

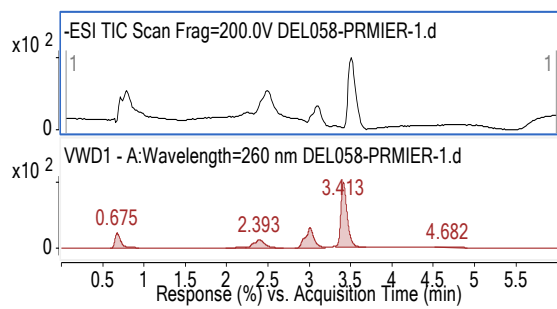



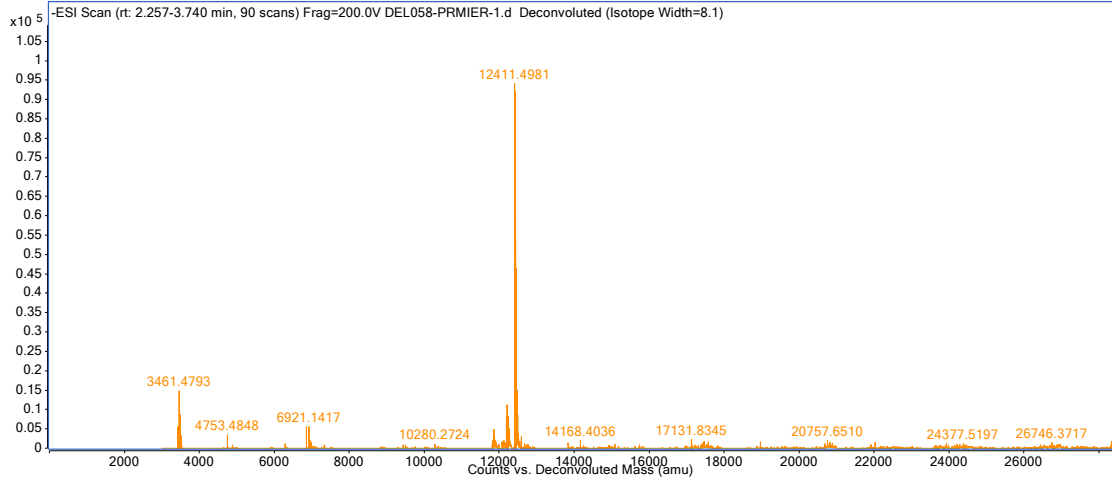

## C1-tag ligation

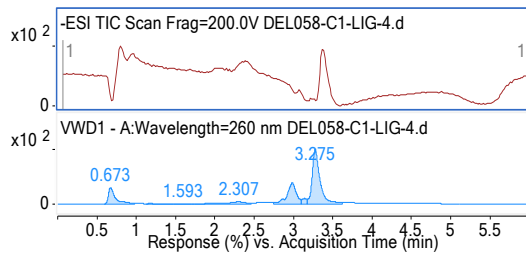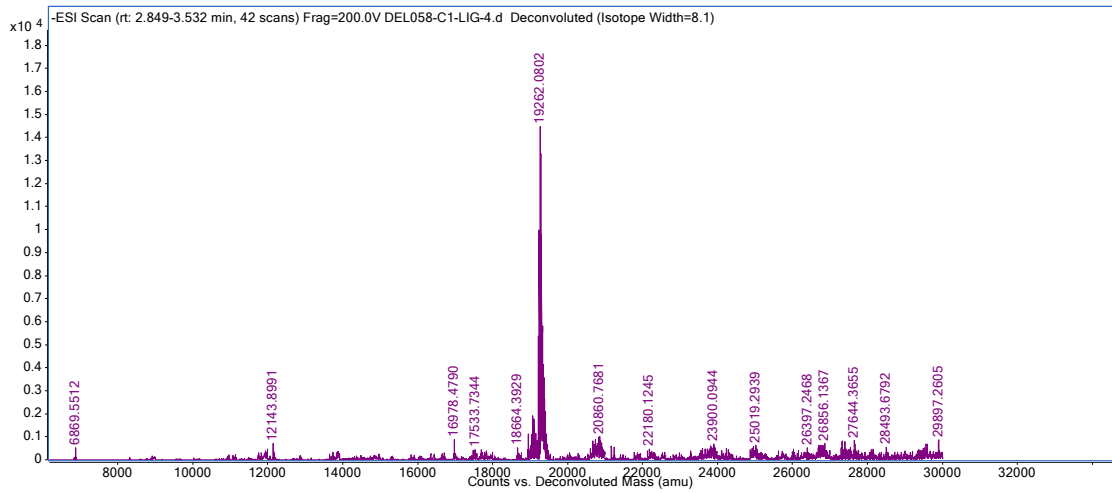

## C1-amidation reaction

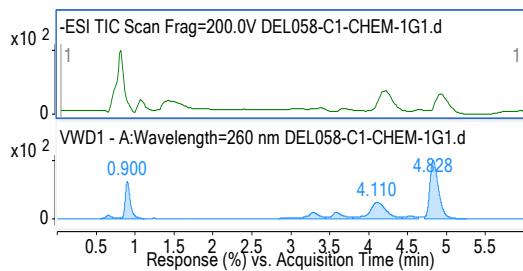

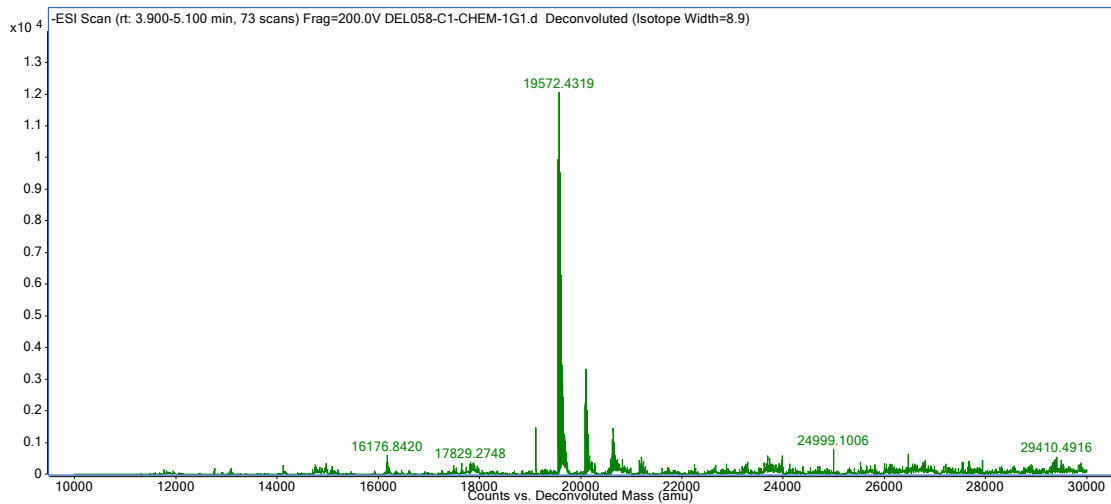

## De-Fmoc

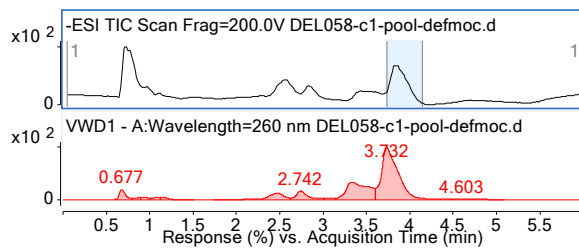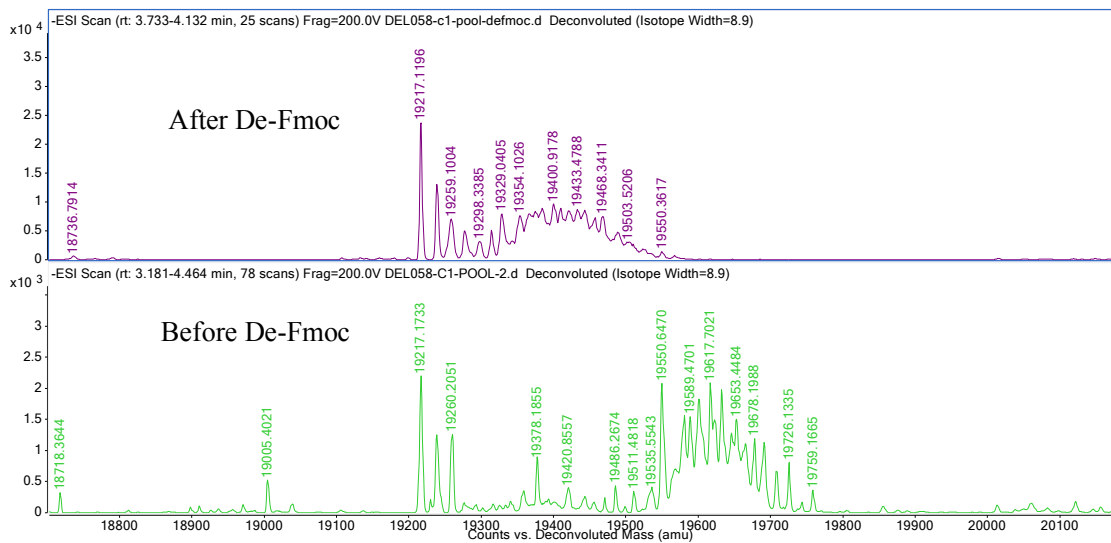

## C2-tag ligation

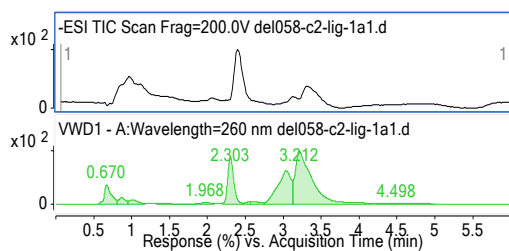

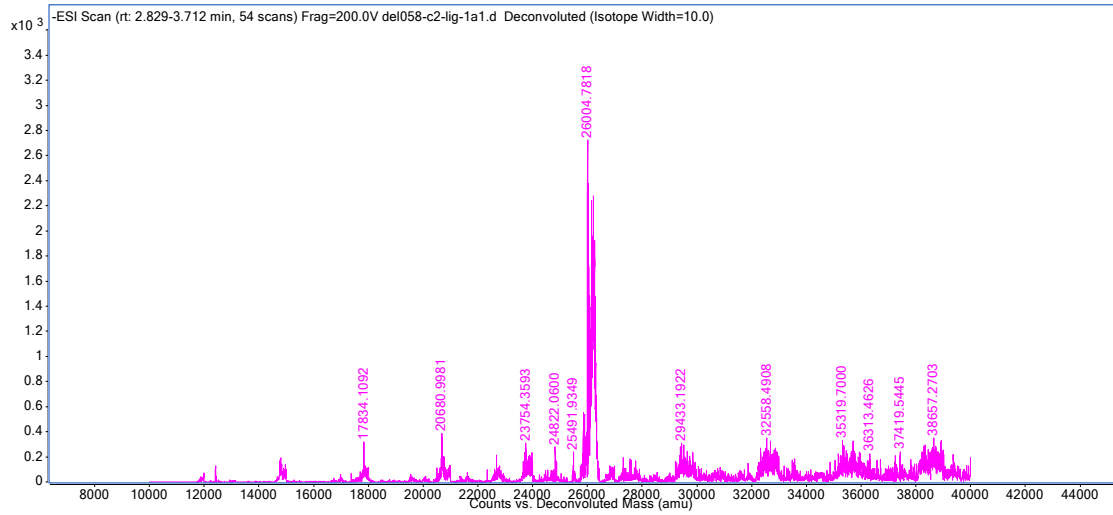

## C2-amidation reaction

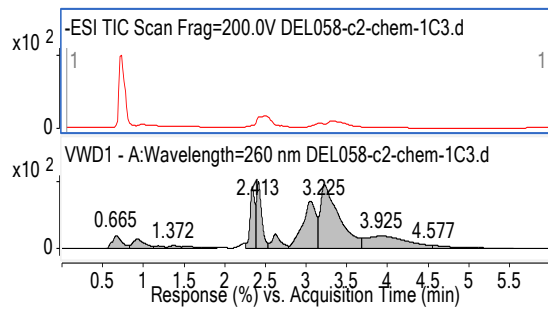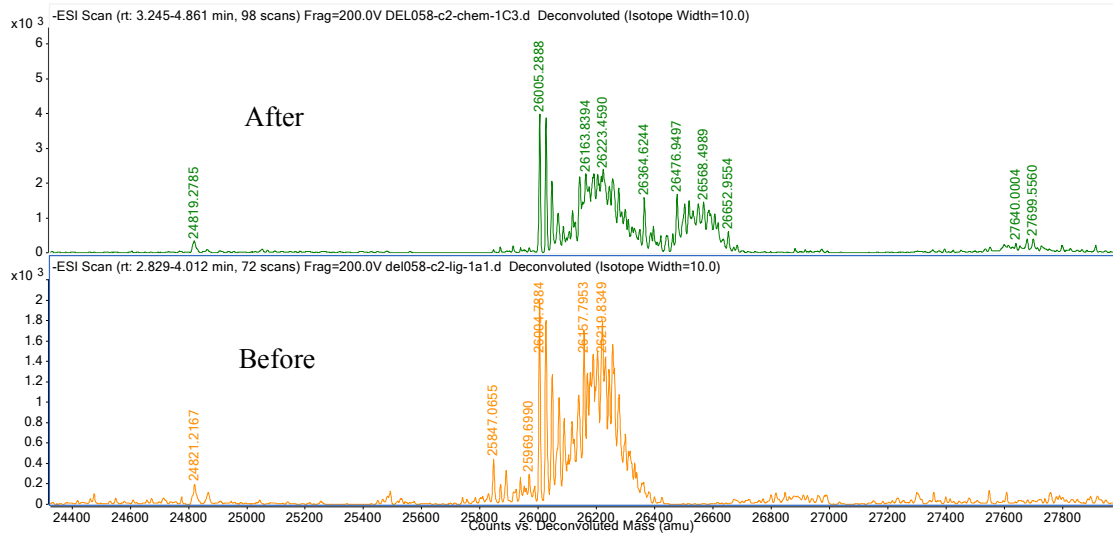

## De-Fmoc

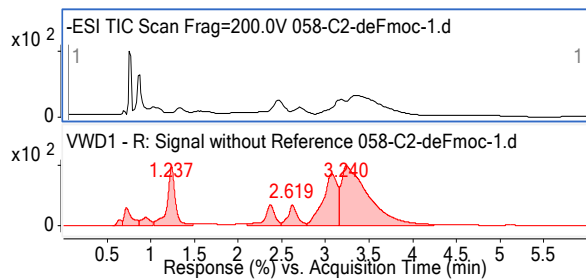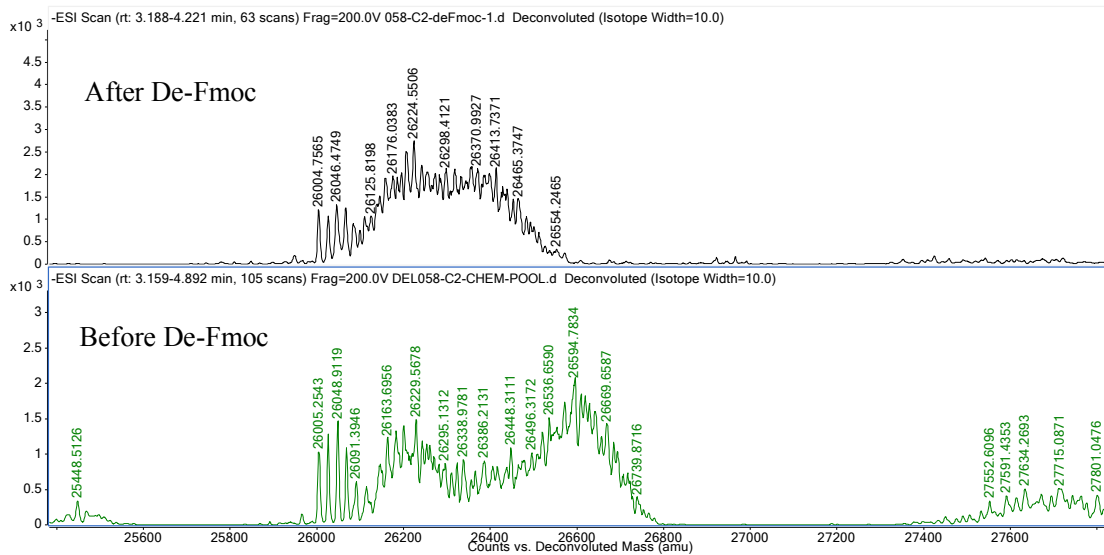

## Amidation with Fmoc-Phe(4-I)-OH

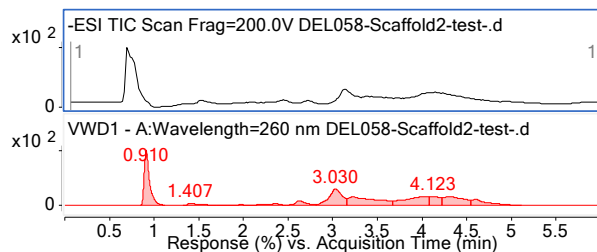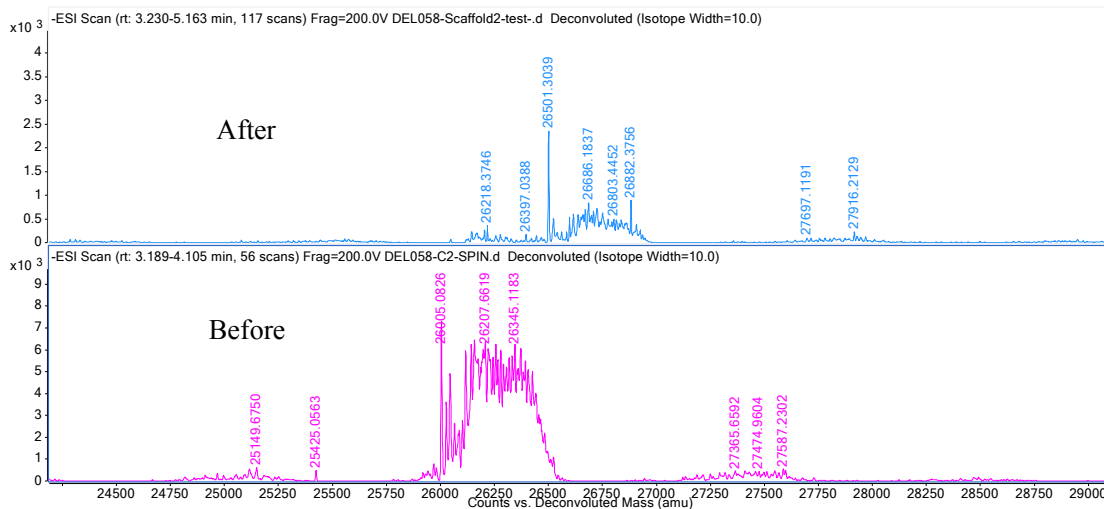

## De-Fmoc

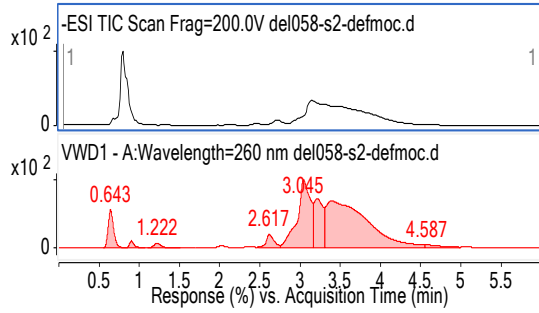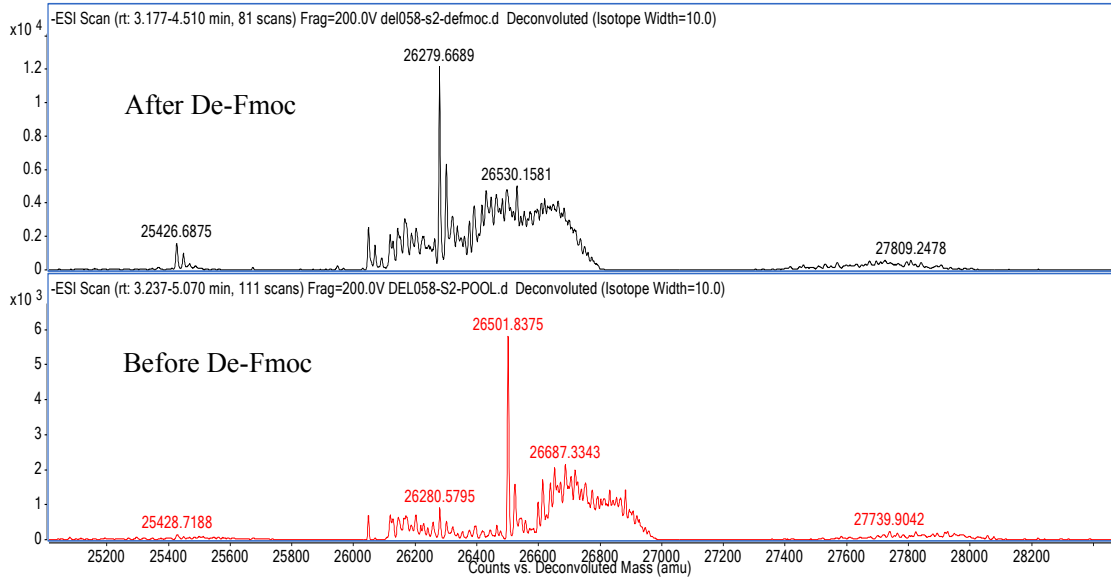

## C3-tag ligation

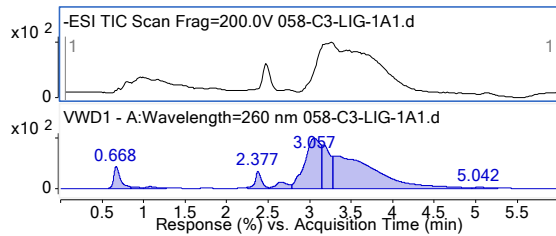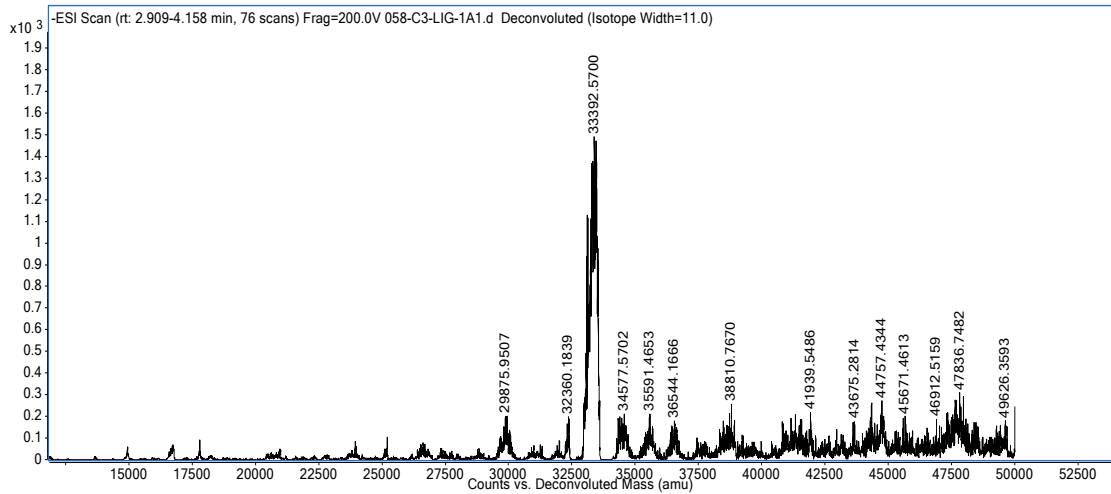

## C3-amidation reaction

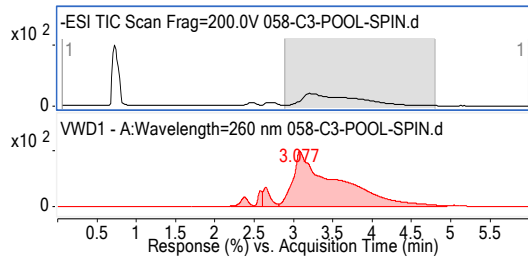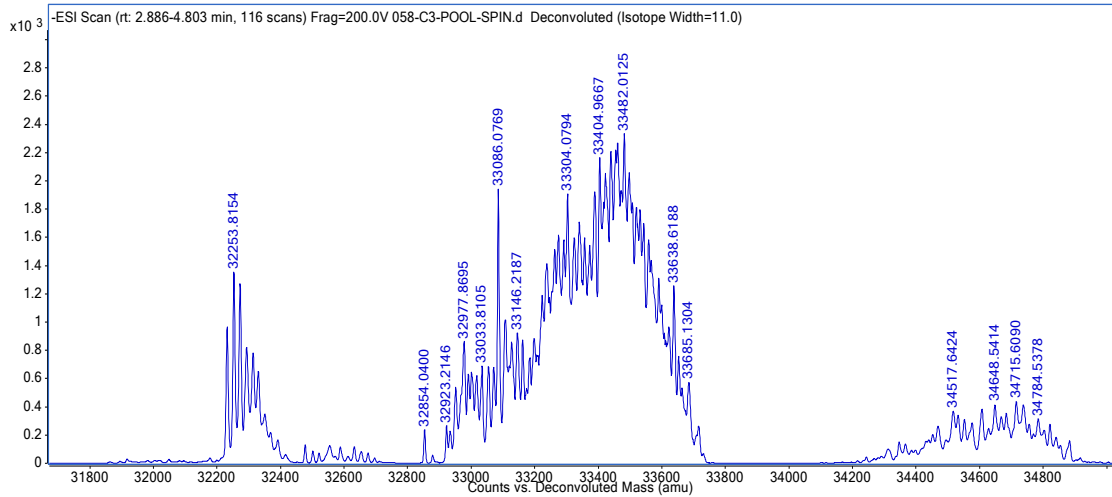

## De-Mmt and S-arylation reaction

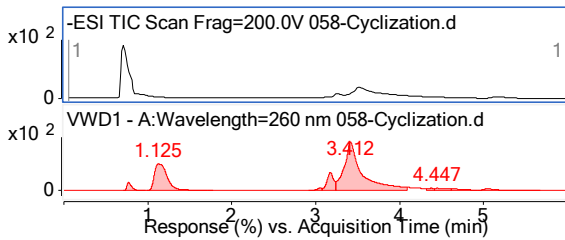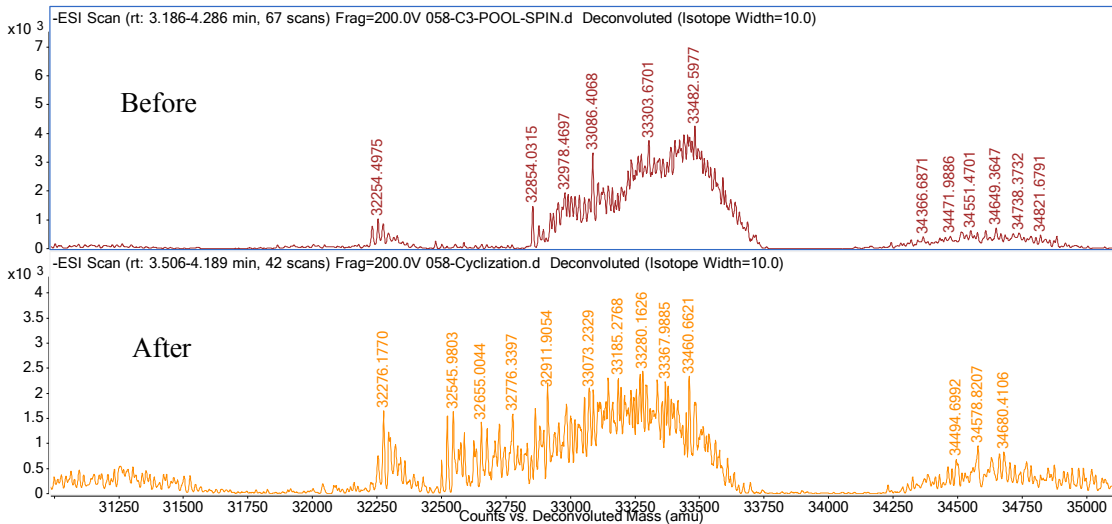



## Library composition

| 1  |         | tag           | tag          | smiles                                 | cas          |
|----|---------|---------------|--------------|----------------------------------------|--------------|
| 2  | Cycle 1 | GAATCCCTGAG   | CAGGGATTCCA  | C#CC[C@@H](NC(OCC1C2=CC=CC=C2C3=       | 332064-94-5  |
| 3  | Cycle 1 | GAGTTCCTCAG   | GAGGAACTCCA  | FC=1C=CC(=CC1)C[C@H](CC(O)=O)NC(OCC    | 331763-70-3  |
| 4  | Cycle 1 | CTTCATTGGAG   | CCAATGAAGCA  | N#CC=1C=CC(=CC1)C[C@H](CC(O)=O)NC      | 270065-90-2  |
| 5  | Cycle 1 | TTACGTCTAG    | AGGACGTAACA  | FC1=C(F)C(F)=C(F)C(F)=C1C[C@H](CC(O)   | 270063-43-9  |
| 6  | Cycle 1 | AAGGAAGACAG   | GTCTTCCTTCA  | C#CC[C@H](NC(OCC1C2=CC=CC=C2C3=CC      | 1217669-02-7 |
| 7  | Cycle 1 | ACACCTGCTAG   | AGCAGGTGTCA  | FC1=C(F)C(F)=C(F)C(F)=C1C[C@H](CC(O)=  | 269398-94-9  |
| 8  | Cycle 1 | CCATGTAGCAG   | GCTACATGGCA  | O=C(O)[C@H]1C[C@H](C=C1)NC(OCC2C3=CC   | 220497-64-3  |
| 9  | Cycle 1 | ATACGTCCGAG   | CGGACGTATCA  | C1C1=CC2=C(C=C1)C(C[C@H](C(O)=O)NC(O   | 925916-73-0  |
| 10 | Cycle 1 | CCACCTACTAG   | AGTAGGTGGCA  | N#CC=1C=CC(=CC1)C[C@H](CC(O)=O)NC(C    | 269726-87-6  |
| 11 | Cycle 1 | AGTGGGATGAG   | CATCCCCTCA   | O=C(O)[C@H](NC(OCC1C2=CC=CC=C2C3=C     | 205528-32-1  |
| 12 | Cycle 1 | GACCGGATTAG   | AATCCGGTCCA  | C1=CC=C2CN([C@H](CC2=C1)C(=O)O)C(=     | 136030-33-6  |
| 13 | Cycle 1 | GAACGCCTTAG   | AAGGCGTTCCA  | C1C=1C=CC(=CC1)C[C@H](C(O)=O)NC(OCC    | 142994-19-2  |
| 14 | Cycle 1 | ATCGCGTACAG   | GTACGCGATCA  | N#CC=1C=CC(=CC1)C[C@H](C(O)=O)NC(OCC   | 205526-34-7  |
| 15 | Cycle 1 | GTTCGGTACAG   | GTACCGAACCA  | C1=CC=C2C(C=C1)C3=CC=CC=C3C2COC(=O     | 101555-63-9  |
| 16 | Cycle 1 | ATGTGGGAAAAG  | TTCCGACATCA  | O=C(O)[C@H](NC(OCC1C2=CC=CC=C2C3=CC    | 198543-96-3  |
| 17 | Cycle 1 | GAAGACGCTAG   | ACGCTCTTCCA  | O=C(O)[C@H](NC(OCC1C2=CC=CC=C2C3=C     | 269078-72-0  |
| 18 | Cycle 1 | CAAAGCCGTAG   | ACGGCTTTGCA  | O=C([C@H]1C[C@H](NC(OCC2C3=C(C4=C      | 220497-66-5  |
| 19 | Cycle 1 | AGGATGTTGAG   | CAACATCCTCA  | C1=CC=C2C(C=C1)C3=CC=CC=C3C2COC(=O     | 193693-64-0  |
| 20 | Cycle 1 | CGATTGAGAAAG  | TCTCAATCGCA  | C1=CC=C2C(C=C1)C3=CC=CC=C3C2COC(=O     | 129223-22-9  |
| 21 | Cycle 1 | AGGCTGTTGAG   | CAACAGCCTCA  | O=C(O)[C@H](CC1=CSC=C1)NC(OCC2C3=CC    | 186320-06-9  |
| 22 | Cycle 1 | GTGTTCTCTAG   | AGAGAACACCA  | C1C1=CC2=C(C=C1)C(C[C@H](C(O)=O)NC     | 908847-42-7  |
| 23 | Cycle 1 | CTCATTACGAG   | CGTAATGAGCA  | O=C(O)[C@H](CC1=CSC=N1)NC(OCC2C3=CC    | 205528-32-1  |
| 24 | Cycle 1 | TTAGAACGGAG   | CCGTTCTAACA  | CN([C@H](CC1CCCC1)C(=O)O)C(=O)OC(=     | 148983-03-3  |
| 25 | Cycle 1 | TCTATCCCTAG   | AGGGATAGACA  | O=C(O)[C@H](CC1=CC=CO1)NC(OCC2C3=CC    | 159611-02-6  |
| 26 | Cycle 1 | ACGTTCAGAAAG  | TCTGAACGTCA  | O=C(O)[C@H](NC(OCC1C2=CC=CC=C2C3=CC    | 205526-38-1  |
| 27 | Cycle 1 | AAGTCACACAG   | GTGTGACTTCA  | O=C(O)C1CCC(CC1)CNC(OCC2C3=CC=CC=C     | 188715-40-4  |
| 28 | Cycle 1 | CAGTAAAGAG    | CTTTAGTGTCA  | C=CCC(C(O)=O)NC(OCC1C2=CC=CC=C2C3=     | 1311992-97-8 |
| 29 | Cycle 1 | TGAAAACCGAG   | CGGTTTCCACA  | O=C(O)C[C@H](C1=CC([N+])([O-])=O)CC=C  | 374791-04-5  |
| 30 | Cycle 1 | TTCCGAGAGAG   | CTCTCGGAACA  | NC(NCCC[C@H](C(O)=O)NC(OCC1C2=CC=C     | 200344-33-8  |
| 31 | Cycle 1 | CCTTATGCTAG   | AGCATAAGGCA  | O=C(O)C[C@H](C1=CC=C(Br)C=C1)NC(OCC    | 220498-04-4  |
| 32 | Cycle 1 | CCACAATCGAG   | CGATTGTGGCA  | CC1=CC=CC=C1[C@H](NC(OCC2C3=CC=CC=C    | 507472-27-7  |
| 33 | Cycle 1 | TGGTGTGAGAG   | CTCACACCACA  | O=C(O)C[C@H](C1=CC=C(C(F)(F)F)C=C1)NC  | 517905-88-3  |
| 34 | Cycle 1 | TGACGTAGCAG   | GCTACGTACACA | O=C(O)CC(C1=CC=C(Br)C=C1)NC(OCC2C3=    | 269078-76-4  |
| 35 | Cycle 1 | GTAGGTTTGTAG  | CAAACCTACCA  | CC1=CC=C(C(NC(OCC2C3=CC=CC=C3C4=C      | 284492-08-6  |
| 36 | Cycle 1 | CACTTGTTTCTAG | GAACAAGTGCA  | C1=CC=C(C=C1)C[C@H](C(=O)N2CCC[C@      | 138372-76-6  |
| 37 | Cycle 1 | ATGAGCTGCAG   | GCAGCTCATCA  | C=CCC(NC(OCC1C2=CC=CC=C2C3=CC=CC       | 221884-63-5  |
| 38 | Cycle 1 | GAATAGGCCAG   | GGCCTATTCCA  | C1CCC2C(C1)C[C@H](C(=O)O)N2C(=O)OCC    | 1217512-55-4 |
| 39 | Cycle 1 | GTACATCAGAG   | CTGATGTACCA  | O=C(O)C[C@H](CC1=CC=CS1)NC(OCC2C3=     | 270262-98-1  |
| 40 | Cycle 1 | AGCGGTTCAAG   | TGAACGCCTCA  | C=CC[C@H](NC(OCC1C2=CC=CC=C2C3=CC      | 170642-28-1  |
| 41 | Cycle 1 | GAGAATGCTAG   | AGCATTCTCCA  | C#CCCC[C@H](C(=O)O)NC(=O)OCC1C2=C      | 1097192-05-6 |
| 42 | Cycle 1 | TCACGATCCAG   | GGATCGTGACA  | FC1=C(F)C(F)=C(F)C(F)=C1C[C@H](C(O)=   | 205526-32-5  |
| 43 | Cycle 1 | ACGGGAACAAG   | TGTTCCCGTCA  | CC1=CC=C(C[C@H](NC(OCC2C3=CC=CC=C      | 199006-54-7  |
| 44 | Cycle 1 | CAACGACACAG   | GTGTCGTTGCA  | CC1=C(C(C)=CC(O)=C1)C[C@H](NC(OCC2C    | 206060-54-0  |
| 45 | Cycle 1 | GTAAGGGTCAG   | GACCCTTACCA  | O=C(O)[C@H](CC1=CSC2=CC=CC=C12)NC(=    | 177966-60-8  |
| 46 | Cycle 1 | CACATGACTAG   | AGTCATGTGCA  | O=C([C@H]1N(C(OCC2C3=C(C4=C2C=CC=C     | 130309-37-4  |
| 47 | Cycle 1 | ATAGCAGTGAG   | CACTGCTATCA  | O=C(O)C1=CC=CC(CNC(OCC2C3=CC=CC=C      | 155369-11-2  |
| 48 | Cycle 1 | TCCAGACATAG   | ATGTCTGGACA  | FC1=CC(C[C@H](C(O)=O)NC(OCC2C3=CC=C    | 205526-31-4  |
| 49 | Cycle 1 | TCAATCAGGAG   | CCTGATTGACA  | C1C=1C=CC(=CC1)C[C@H](C(O)=O)NC(O      | 177966-59-5  |
| 50 | Cycle 1 | TCCCGAACTAG   | AGTTCCGGGACA | C1=CC=C2C(C=C1)C3=CC=CC=C3C2COC(=O     | 885951-89-3  |
| 51 | Cycle 1 | GTAAGAGAGAG   | CTCTCTTACCA  | IC=1C=CC(=CC1)C[C@H](C(O)=O)NC(OCC     | 82565-68-2   |
| 52 | Cycle 1 | CTCGCAACTAG   | AGTTGCGAGCA  | IC=1C=CC(=CC1)C[C@H](C(O)=O)NC(OCC2    | 205526-29-0  |
| 53 | Cycle 1 | GTTGGCTTGTAG  | CAAGCCAACCA  | C1=CC=C2C(C=C1)C[C@H](C(=O)O)N2C(=O    | 198560-38-2  |
| 54 | Cycle 1 | TCTTCAGGGAG   | CCCTGAAGACA  | O=[N+](=[O-])C=1C=CC(=C(C1)[N+](=[O-]) | 140430-54-2  |
| 55 | Cycle 1 | GAAGTATGCAG   | GCATACTTCCA  | O=C(O)[C@H](CC1=CSC2=CC=CC=C12)N(=     | 177966-61-9  |
| 56 | Cycle 1 | CTAAGTCACAG   | GTGACTTAGCA  | O=C(O)[C@H](CC1CC1)NC(OCC2C3=CC=CC     | 214750-76-2  |
| 57 | Cycle 1 | AGAGTAAGGAG   | CCTTACTTCCA  | O=C(O)C[C@H](CC1=CC=CO1)NC(OCC2C3=     | 270263-07-5  |
| 58 | Cycle 1 | GTTTACCCAG    | GGGGTAAACCA  | O=C(O)C1NC(OCC2C3=CC=CC=C3C4=CC=C      | 162648-54-6  |
| 59 | Cycle 1 | CTTTCGGGAAG   | TCCCGAAAGCA  | FC1=CC2=C(C=C1)C(CC(C(O)=O)NC(OCC3C    | 1219392-55-8 |
| 60 | Cycle 1 | CTAGGGAGTAG   | ACTCCCTAGCA  | C1C=1C=CC(=CC1)C[C@H](C(O)=O)NC(OCC    | 177966-58-4  |



|     |         |              |             |                                                           |              |
|-----|---------|--------------|-------------|-----------------------------------------------------------|--------------|
| 61  | Cycle 1 | GTAAAGCTCAG  | GAGCTTTACCA | BrC=1C=CC(=CC1)C[C@@H](C(O)=O)NC(O)C                      | 198561-04-5  |
| 62  | Cycle 1 | CCTACTTGCAG  | GCAAGTAGGCA | O=[N+][([O-])C=1C=CC(=CC1)C[C@H](C(O)=O)C                 | 177966-63-1  |
| 63  | Cycle 1 | AAGCTCGTAAAG | TACGAGTTCA  | O=C(O)C[C@@H](NC(OCC1C2=CC=CC=C2C3=CC=CC=C3               | 1217460-65-5 |
| 64  | Cycle 1 | ACGATTAGCAG  | GCTAATCGTCA | O=C(O)[C@@H](CC1=CN=CC=C1)NC(OCC2C3=CC=CC=C3              | 142994-45-4  |
| 65  | Cycle 1 | AACGGAGTAAAG | TACTCCGTTC  | O=C(O)[C@@H](NC(OCC1C2=CC=CC=C2C3=CC=CC=C3                | 220497-61-0  |
| 66  | Cycle 1 | CAACTGAAGAG  | CTTCAGTTGCA | O=C(O)C=1C=CC(=CC1)CNC(OCC2C3=CC=CC=C3C4=CC=CC=C4         | 164470-64-8  |
| 67  | Cycle 1 | AAGAATGGCAG  | GCCATTCTTCA | O=C(O)C1(CCCC1)NC(OCC2C3=CC=CC=C3C4=CC=CC=C4              | 117322-30-2  |
| 68  | Cycle 1 | AGGGGAACAAG  | TGTTCCCTCA  | O=C(O)C1(CCC1)NC(OCC2C3=CC=CC=C3C4=CC=CC=C4               | 885951-77-9  |
| 69  | Cycle 1 | CGCGAATATAG  | ATATTGCGCA  | FC(F)(F)C=1C=CC(=CC1)C[C@@H](C(O)=O)C                     | 247113-86-6  |
| 70  | Cycle 1 | AAGTCGGATAG  | ATCCGACTTCA | C1=CC=C2C(=C1)C3=CC=CC=C3C2COC(=O)C                       | 178432-49-0  |
| 71  | Cycle 1 | GTCTGCTTAG   | AAGGAGAACCA | COC1=C(OC)C=C(C[C@H](NC(OCC2C3=CC=CC=C3C4=CC=CC=C4        | 184962-88-7  |
| 72  | Cycle 1 | CACCACTTAAAG | TAAGTGGTGCA | O=C(O)[C@H](CC1=CC=CS1)NC(OCC2C3=CC=CC=C3C4=CC=CC=C4      | 130309-35-2  |
| 73  | Cycle 1 | CATGATGAGAG  | CTCATCATGCA | OC=1C=CC2=C(C1)C(=CN2)C[C@@H](C(O)=O)C                    | 178119-94-3  |
| 74  | Cycle 1 | CACGATCATAG  | ATGATCGTGCA | O=C(O)[C@H]1CCC[C@@H]1NC(OCC2C3=CC=CC=C3C4=CC=CC=C4       | 359586-64-4  |
| 75  | Cycle 1 | GCCCTATTAAG  | TAATAGGGCCA | O=C(O)C[C@H](CC1=CSC=C1)NC(OCC2C3=CC=CC=C3C4=CC=CC=C4     | 270263-01-9  |
| 76  | Cycle 1 | GACCTTTGGAG  | CCAAAGTTCCA | O=C(O)C1(CCOCC1)NC(OCC2C3=CC=CC=C3C4=CC=CC=C4             | 285996-72-7  |
| 77  | Cycle 1 | ATGCTCCTAG   | AGGAGGCATCA | O=C(O)[C@H](C1=CSC=C1)NC(OCC2C3=CC=CC=C3C4=CC=CC=C4       | 1217706-09-6 |
| 78  | Cycle 1 | TGTTCCAGGAG  | GCCTGAACACA | O=C(O)C1(CCC1)NC(OCC2C3=CC=CC=C3C4=CC=CC=C4               | 126705-22-4  |
| 79  | Cycle 1 | TTCCAGTAAAG  | TACTGGGAACA | C1=CC=C2C(=C1)C3=CC=CC=C3C2COC(=O)C                       | 185116-43-2  |
| 80  | Cycle 1 | GGACTTCGAAG  | TCGAAGTCCCA | C#CC[C@@H](NC(OCC1C2=CC=CC=C2C3=CC=CC=C3C4=CC=CC=C4       | 220497-98-3  |
| 81  | Cycle 1 | TAAGAAGCGAG  | CGTCTTTACA  | C#CC[C@H](NC(OCC1C2=CC=CC=C2C3=CC=CC=C3C4=CC=CC=C4        | 198561-07-8  |
| 82  | Cycle 1 | TAGCGGTAG    | AACGCTAGCA  | C1C=1C=CC(=C(C1)C1)C[C@H](C(O)=O)NC                       | 352351-62-3  |
| 83  | Cycle 1 | TGCGATCAGAG  | CTGATCGCACA | FC1=CC(C[C@@H](C(O)=O)NC(OCC2C3=CC=CC=C3C4=CC=CC=C4       | 205526-30-3  |
| 84  | Cycle 1 | CGCAAAGACAG  | GTCTTTGCGCA | O=C(O)[C@H](CC1=CN=CC=C1)NC(OCC2C3=CC=CC=C3C4=CC=CC=C4    | 175453-07-3  |
| 85  | Cycle 1 | CCCGTTATAG   | ATAACCGGGCA | O=C(O)[C@H](NC(OCC1C2=CC=CC=C2C3=CC=CC=C3C4=CC=CC=C4      | 136555-16-3  |
| 86  | Cycle 1 | CCGAATAGGAG  | CCTATTCGGCA | O=C(O)[C@@H](NC(OCC1C2=CC=CC=C2C3=CC=CC=C3C4=CC=CC=C4     | 138775-07-2  |
| 87  | Cycle 1 | GGCCAGTTAG   | AAACTGGCCCA | FC(F)(F)C(NCCCC[C@@H](C(O)=O)NC(O)C                       | 76265-69-5   |
| 88  | Cycle 1 | ACTAGTACCAG  | GGTACTAGTCA | O=C(CC[C@H](NC(OCC1C2=CC=CC=C2C3=CC=CC=C3C4=CC=CC=C4      | 150047-85-1  |
| 89  | Cycle 1 | ACCTATCTCAG  | GAGATAGGTCA | [N-]=[N+]=NCCC[C@@H](C(O)=O)NC(OCC1C2=CC=CC=C2C3=CC=CC=C3 | 1097192-04-5 |
| 90  | Cycle 1 | AGGAGCAGTAG  | ACTGCTCCTCA | C#CC[C@](C(O)=O)NC(OCC1C2=CC=CC=C2C3=CC=CC=C3C4=CC=CC=C4  | 1198791-65-9 |
| 91  | Cycle 1 | GCTCGAAGAAG  | TCTTCGAGCCA | C[C@H](OCC1=CC=CC=C1)[C@H](NC(O)C                         | 117872-75-0  |
| 92  | Cycle 1 | CAGAATCCCAG  | GGGATTTGCA  | O=C(O)C[C@H](C1=CC=C([N+])([O-])O)C=C                     | 507472-26-6  |
| 93  | Cycle 1 | ACGCTCCAAAG  | TTGGAGCGTCA | COC1=CC(OC)=CC([C@H](NC(OCC2C3=CC=CC=C3C4=CC=CC=C4        | 511272-41-6  |
| 94  | Cycle 1 | TCTCCGATCAG  | GATCGGAGACA | O=C(O)C[C@H](C1=CN=CC=C1)NC(OCC2C3=CC=CC=C3C4=CC=CC=C4    | 511272-43-8  |
| 95  | Cycle 1 | GTCAAAGAGAG  | CTCTTTGACCA | O=C(O)C[C@H](C1=CC=CS1)NC(OCC2C3=CC=CC=C3C4=CC=CC=C4      | 511272-45-0  |
| 96  | Cycle 1 | CGTTCGTATAG  | ATACGAACGCA | O=C(O)C[C@H](C1=CC=CO1)NC(OCC2C3=CC=CC=C3C4=CC=CC=C4      | 1217662-55-9 |
| 97  | Cycle 1 | TAGTAGGAGAG  | CTCCTACTACA | CC(C1=CC=C(C[C@H](NC(OCC2C3=CC=CC=C3C4=CC=CC=C4           | 204716-07-4  |
| 98  | Cycle 1 | CCGTTACACAG  | GTGTAACGGCA | O=C(O)C1=CC(NC(OCC2C3=CC=CC=C3C4=CC=CC=C4                 | 1071446-05-3 |
| 99  | Cycle 1 | AGAGATTCGAG  | CGAATCTCTCA | C1(C2=C(C=CC=C2)C3=C1C=CC=C3)COC(N                        | 1260596-73-3 |
| 100 | Cycle 1 | GAGTGGACTAG  | AGTCCACTCCA | O=C(O)[C@H](CC1=CNC2=C1C=CC=N2)NC(O)C                     | 737007-45-3  |
| 101 | Cycle 1 | TTATGGCCGAG  | CGGCCATAACA | N1([C@H](C(=O)O)C[C@H](C1)F)C(=O)OCC1                     | 1228307-81-0 |
| 102 | Cycle 1 | GTAGCCTGTAG  | ACAGGCTACCA | FC1=CC(C[C@H](C(O)=O)NC(OCC2C3=CC=CC=C3C4=CC=CC=C4        | 205526-25-6  |
| 103 | Cycle 1 | TGGCGTTTTAG  | AAAACGCCACA | FC=1C=CC(=C(C1)F)C[C@@H](C(O)=O)NC(O)C                    | 1032337-49-7 |
| 104 | Cycle 1 | TACTCGGGAAG  | TCCCGAGTACA | C1=CC=C2C(=C1)C3=CC=CC=C3C2COC(=O)C                       | 133054-21-4  |
| 105 | Cycle 1 | TGAGTTCAGAG  | CTGAACTCACA | C1(C2=C(C=CC=C2)C3=C1C=CC=C3)COC(N                        | 1217716-50-1 |
| 106 | Cycle 1 | TATGTGGGGAG  | CCCACATACA  | O=C(O)C1(NC(OCC2C3=CC=CC=C3C4=CC=CC=C4                    | 135944-07-9  |
| 107 | Cycle 1 | AGGGTCCCTAG  | AAGGACCCTCA | O=C(O)[C@H](CC1CCC1)NC(OCC2C3=CC=CC=C3C4=CC=CC=C4         | 478183-62-9  |
| 108 | Cycle 1 | AGCCAACCTAG  | AAGTTGGCTCA | O=C(O)[C@@H]1CCC[C@H]1NC(OCC2C3=CC=CC=C3C4=CC=CC=C4       | 359586-69-9  |
| 109 | Cycle 1 | GCACATACAG   | GATATGTGCCA | O=C(O)CC1(NC(OCC2C3=CC=CC=C3C4=CC=CC=C4                   | 282524-98-5  |
| 110 | Cycle 1 | AGCATCGCTAG  | AGCGATGCTCA | O=C(O)CC1(CNC(OCC2C3=CC=CC=C3C4=CC=CC=C4                  | 882847-19-0  |
| 111 | Cycle 1 | GCTGCGATTAG  | AATCGCAGCCA | O=C(O)[C@@H]1CC[C@H](CC1)CNC(OCC2C3=CC=CC=C3C4=CC=CC=C4   | 167690-53-1  |
| 112 | Cycle 1 | CGTCTACTAG   | AGTGAGACGCA | O=[N+][([O-])C=1C=CC(=CC1)C[C@@H](C(O)=O)C                | 95753-55-2   |
| 113 | Cycle 1 | CCTGTGCATAG  | ATGCACAGGCA | C1=CC=C2C(=C1)C3=CC=CC=C3C2COC(=O)C                       | 86069-86-5   |
| 114 | Cycle 1 | CTCGACTTAAAG | TAAGTCGAGCA | O=C(O)[C@@H]1CC[C@H](CC1)NC(OCC2C3=CC=CC=C3C4=CC=CC=C4    | 147900-46-7  |
| 115 | Cycle 1 | ACTTCGCACAG  | GTGCGAAGTCA | CC1(OCC2=C(O1)C=CC(C[C@H](NC(OCC3C4=CC=CC=C4              | 252049-13-1  |
| 116 | Cycle 1 | TGTTCCGGTAG  | ACCGGAACACA | IC=1C=CC(=CC1)C[C@H](CC(O)=O)NC(OCC                       | 269396-73-8  |
| 117 | Cycle 1 | GCCTAATCAG   | GATTAAGGCCA | BrC=1C=CC(=CC1)C[C@@H](CC(O)=O)NC(O)C                     | 270062-86-7  |
| 118 | Cycle 1 | TGCGACGATAG  | ATCGTCGCACA | C1C=1C=CC(=CC1)C[C@H](CC(O)=O)NC                          | 270063-52-0  |
| 119 | Cycle 1 | AGATGAGAGAG  | CTTCATCTCA  | IC=1C=CC(=CC1)C[C@@H](CC(O)=O)NC(O)C                      | 270065-72-0  |
| 120 | Cycle 1 | TGCCCTAGAAG  | TCTAGGGCACA | O=C(O)C[C@H](CC1=CNC2=CC=CC=C12)NC                        | 353245-98-4  |



|     |         |              |              |                                                    |
|-----|---------|--------------|--------------|----------------------------------------------------|
| 121 | Cycle 1 | TGAAGACACAG  | GTGTCTTCACA  | O=C(O)C[C@@H](C1=CC=C(F)C=C1)NC(OC( 479064-89-6    |
| 122 | Cycle 1 | TCCAGTGACAG  | GTCACTGGACA  | O=C(O)C[C@@H](C1=C(C)C(C1)=CC=C1)NC 501015-35-6    |
| 123 | Cycle 1 | TTCACCACTAG  | AGTGGTGAACA  | O=C(O)C[C@@H](C1=C(C)C=C(C1)C=C1)NC(C 511272-37-0  |
| 124 | Cycle 1 | TAGGCATCCAG  | GGATGCCATACA | O=C(O)[C@@H](NC(OCC1C2=CC=CC=C2C3 161321-36-4      |
| 125 | Cycle 1 | GCGTATTGAG   | CGAATACGCCA  | O=C(O)[C@@H](NC(OCC1C2=CC=CC=C2C3 205526-26-7      |
| 126 | Cycle 1 | TAGCCTTTGAG  | CAAAGGCTACA  | FC=1C=CC(=CC1F)C[C@H](C(O)=O)NC(OCC 198545-59-4    |
| 127 | Cycle 1 | CTTCGCATCAG  | GATGCGAAGCA  | FC=1C=CC(=CC1)C[C@H](C(O)=O)NC(OC( 169243-86-1     |
| 128 | Cycle 1 | CGAATTGCTAG  | AGCAATTCGCA  | C1=CC=C2CN([C@H](CC2=C1)C(=O)O)C(=O 130309-33-0    |
| 129 | Cycle 1 | CACGTCTCAAG  | TGAGACGTGCA  | O=C(O)[C@H](NC(OCC1C2=CC=CC=C2C3=C( 205526-22-3    |
| 130 | Cycle 1 | TCATGGGTAAG  | TACCCATGACA  | N#CC=1C=CC(=CC1)C[C@H](C(O)=O)NC(( 173963-93-4     |
| 131 | Cycle 1 | GATCACCGTAG  | ACGGTGATCCA  | CC(C)OC(N1CCCC(C1)CC(NC(OCC2C3=CC= 457060-97-8     |
| 132 | Cycle 1 | GATCCGATAAG  | TATCGGATCCA  | C[C@]1(CCCN1C(=O)OCC2C3=CC=CC=C3C 167275-47-0      |
| 133 | Cycle 1 | CACAGTTGAAG  | TCAACTGTGCA  | C(F)C1=CC=C(C[C@H](C(O)=O)NC(=O)OC 1808268-08-7    |
| 134 | Cycle 1 | TAGAATCCGAG  | CGGATTCTACA  | C1CN(C[C@H](C(=O)O)NC(OCC2C3=C(C4= 1251903-85-1    |
| 135 | Cycle 1 | TGATCTGACAG  | GTCAGATCACA  | C1=CC=C2C(=C1)C3=CC=CC=C3C2COC(=O 193693-61-7      |
| 136 | Cycle 1 | CTTGCCACTAG  | AGTGGAAGCA   | C1=CC=C2C(=C1)C3=CC=CC=C3C2COC(=O 374791-02-3      |
| 137 | Cycle 1 | CTATGTGTCAG  | GACACATAGCA  | O=C(O)C1NC(OCC2C3=CC=CC=C3C4=CC= 214139-28-3       |
| 138 | Cycle 1 | TCTGATGCGAG  | CGCATCAGACA  | C1=CC=C2C(=C1)CN(C2C(=O)O)C(=O)OCC3 204320-59-2    |
| 139 | Cycle 1 | CGGTTTAAAG   | CTTAAACCGCA  | O=C(O)[C@@H](NC(OCC1C2=CC=CC=C2C3 159610-82-9      |
| 140 | Cycle 1 | GGAATCTACAG  | GTAGATTCCCA  | C1CC[C@H]2[C@H](C1)C[C@H](C(=O)O) 214750-71-7      |
| 141 | Cycle 1 | ACCCGAAGAAG  | TCTTCGGGTCA  | CC(C)C)OC(=O)N1CCN(C1C(=O)O)C(=O)OC( 207129-12-2   |
| 142 | Cycle 1 | TTATCCCCCAG  | GGGGGATAACA  | C1(C2=C(C(=CC=C2)C3=C1C=CC=C3)COC(N 683217-64-3    |
| 143 | Cycle 1 | CCTTCAGACAG  | GTCTGAAGGCA  | FC=1C=CC(=CC1F)C[C@H](C(O)=O)NC(O 198560-43-9      |
| 144 | Cycle 1 | TGACCACCAAG  | TGGTGGTCA    | CC1=CC=CC=C1C[C@H](NC(OCC2C3=CC=C 211637-75-1      |
| 145 | Cycle 1 | CTGCTACTAAG  | TAGTAGCAGCA  | FC(F)C=1C=CC(=CC1)C[C@H](C(O)=O)NC 238742-88-6     |
| 146 | Cycle 1 | CCACACTTAAG  | TAAGTGTGGCA  | C1=CC=C2C(=C1)C3=CC=CC=C3C2COC(=O 139262-20-7      |
| 147 | Cycle 1 | GCTTCACTTAG  | AAGTGAAGCCA  | O=C(O)[C@H]1[C@H](CC1)NC(OCC2C3=CC 220497-67-6     |
| 148 | Cycle 1 | GCAAGTTGTAG  | ACAACCTGCCA  | CC(C)OC(N1C[C@H](C(O)=O)[C@H](NC(O 267230-44-4     |
| 149 | Cycle 1 | ACGTTACAGAG  | CTGTAACGTCA  | C1=CC=C2C(=C1)C3=CC=CC=C3C2COC(=O 1335206-44-4     |
| 150 | Cycle 1 | GTCAGTAGAAG  | TCTACTGACCA  | C=CCC[C@@H](NC(OCC1C2=CC=CC=C2C3 865352-21-2       |
| 151 | Cycle 1 | CTCGAATTCAG  | GAATTCGAGCA  | C1=CC=C2C(=C1)C3=CC=CC=C3C2COC(=O 942153-03-9      |
| 152 | Cycle 1 | ATCGTCACGAG  | CGTGACGATCA  | O=C(O)[C@H](C1CC1)NC(OCC2C3=CC=CC= 1212257-18-5    |
| 153 | Cycle 1 | AACAACCTGCAG | GCAGTTGTTC   | CC(C)OC(N1CCC(C(NC(OCC2C3=CC=CC=C 313051-96-6      |
| 154 | Cycle 1 | AAGAGAGCAAG  | TGCTCTTCTCA  | CC(C)OC(N1CCCC(C(NC(OCC2C3=CC=CC= 372144-11-1      |
| 155 | Cycle 1 | ATCTCTGACAG  | GTCAGAGATCA  | O=C(O)C[C@@H](C1=CC=C(C#N)C=C1)NC(( 507472-24-4    |
| 156 | Cycle 1 | GCCTAGAGTAG  | ACTCTAGGCCA  | CN1C=C(C2=CC=CC=C2)C[C@H](NC(OCC 168471-22-5       |
| 157 | Cycle 1 | AGTTTCGGGAG  | CCCGAAACTCA  | FC(F)C=1C=CC(=CC1)C[C@H](CC(O)=O) 270065-81-1      |
| 158 | Cycle 1 | TTACATCCCAG  | GGGATGTAACA  | FC1=CC=CC(C[C@H](CC(O)=O)NC(OCC2C3 331763-67-8     |
| 159 | Cycle 1 | CCGTATAGTAG  | ACTATACGGCA  | N#CC1=CC=CC(C[C@H](CC(O)=O)NC(OCC2 269726-84-3     |
| 160 | Cycle 1 | GCCCAACTTAG  | AAGTTGGGCCA  | O=C(O)C[C@H](NC(OCC1C2=CC=CC=C2C3 268734-29-8      |
| 161 | Cycle 1 | CCATATCAAGAG | CTTGATAGGCA  | C1=CC=C2C(=C1)C3=CC=CC=C3C2COC(=O 193693-60-6      |
| 162 | Cycle 1 | ACCACCAACAG  | GTTGGTGGTCA  | C1=CC=C2CN([C@H](CC2=C1)CC(=O)O)C(= 332064-67-2    |
| 163 | Cycle 1 | ACTGATGGGAG  | CCCATCAGTCA  | C1C=1C=CC(=CC1)C[C@H](CC(O)=O)NC(O 331763-60-1     |
| 164 | Cycle 1 | AACGGGAATAG  | ATTCCC GTTCA | C1C=1C=CC(=C(C1)C)C[C@H](CC(O)=O)N 270063-49-5     |
| 165 | Cycle 1 | ATGTCTCAGAG  | CTGAGACATCA  | C1C=1C=CC(=C(C1)C)C[C@H](CC(O)=O)NC 269396-54-5    |
| 166 | Cycle 1 | GCTGAATCAAG  | TGATTACGCCA  | FC=1C=CC(=CC1)C[C@H](CC(O)=O)NC(O 270062-83-4      |
| 167 | Cycle 1 | TGTACTGGCAG  | GCCAGTACACA  | O=C(O)C[C@H](CC1=CC=CS1)NC(OCC2C3= 269726-90-1     |
| 168 | Cycle 1 | ACAGAGCCAAG  | TGGCTCTGTCA  | O=C(O)C[C@H](CC1=CSC2=CC=CC=C12)NC 270063-46-2     |
| 169 | Cycle 1 | ATAGCATGGAG  | CCATGCTATCA  | BrC=1C=CC(=CC1)C[C@H](CC(O)=O)NC(O 331763-76-9     |
| 170 | Cycle 1 | CGCATTGGAAG  | TCCAATGCGCA  | C1C=1C=CC(=CC1)C[C@H](CC(O)=O)NC(C 270596-43-5     |
| 171 | Cycle 1 | AAGCGAACGAG  | CGTTCGCTTCA  | C1C=1C=CC(=CC1)C[C@H](CC(O)=O)NC(C 269396-57-8     |
| 172 | Cycle 1 | CCGCAAAACAG  | GTTTTGCGGCA  | FC(F)C=1C=CC(=CC1)C[C@H](CC(O)=O) 269726-78-5      |
| 173 | Cycle 1 | TTCCTGCTGAG  | CAGCAGGAACA  | O=C(O)C[C@H](C1=CC=C(C1)C=C1)NC(OCC 479064-92-1    |
| 174 | Cycle 1 | TCTGGTCTGAG  | CAGACCAGACA  | O=C(O)C[C@H](C1=CC(C1)=CC=C1)NC(OCC 511272-53-0    |
| 175 | Cycle 1 | TTGGGCATAAG  | TATGCCCAACA  | C1CCC(C1)C[C@H](C(=O)O)NC(=O)OCC2C3 1262802-59-4   |
| 176 | Cycle 1 | GCAGGGAATAG  | ATTCCC TGCCA | C=CC[C@H](NC(OCC1C2=CC=CC=C2C3=C1 146549-21-5      |
| 177 | Cycle 1 | GCTACCATGAG  | CATGGTAGCCA  | O=[N+][([O-])C=1C=CC(=CC1)C[C@H](CC(O) 269398-78-9 |
| 178 | Cycle 1 | GGTTGAAGGAG  | CCTTCAACCCA  | O=[N+][([O-])C=1C=CC(=CC1)C[C@H](CC(C 270062-88-9  |
| 179 | Cycle 1 | ACGCGTAAAG   | TTTACGCTCA   | CC(=O)NCSC[C@H](C(=O)O)NC(=O)OCC1 86060-81-3       |
| 180 | Cycle 1 | ATGCTCGTGAG  | CACGAGCATCA  | CC(C)C)OC(=O)NCCCC[C@H](C(=O)O)NC 71989-26-9       |



|     |         |             |               |                                       |              |
|-----|---------|-------------|---------------|---------------------------------------|--------------|
| 181 | Cycle 1 | GGTAAGTTGAG | CAACTTACCCA   | C1C[C@H](N(C1)C(=O)OCC2C3=CC=CC=C3    | 71989-31-6   |
| 182 | Cycle 1 | TCTTGCACGAG | CGTGC AAGACA  | CC(C(C(=O)O)NC(=O)OCC1C2=CC=CC=C2C    | 71989-35-0   |
| 183 | Cycle 1 | TACCCGAATAG | ATTCGGGTACA   | CSCCC(C(=O)O)NC(=O)OCC1C2=CC=CC=C     | 71989-28-1   |
| 184 | Cycle 1 | TTGTAGCGCAG | GCGCTACAACA   | CC(C)(C)OCC(C(=O)O)NC(=O)OCC1C2=CC=C  | 128107-47-1  |
| 185 | Cycle 1 | ATTGCGTGCAG | GCACGCAATCA   | CC(C)C(C(=O)O)NC(=O)OCC1C2=CC=CC=C    | 68858-20-8   |
| 186 | Cycle 1 | GTAGTTCCGAG | CGGAAC TACCA  | CC(C)CC(C(=O)O)NC(=O)OCC1C2=CC=CC=C   | 35661-60-0   |
| 187 | Cycle 1 | CAGTAGCTAAG | TAGCTACTGCA   | C1=CC=C(C=C1)CC(C(=O)O)NC(=O)OCC2C3   | 35661-40-6   |
| 188 | Cycle 1 | CATACGCGTAG | ACGCGTATGCA   | CC(C(=O)O)NC(=O)OCC1C2=CC=CC=C2C3=    | 35661-39-3   |
| 189 | Cycle 1 | ACAAGCACTAG | AGTGCTTG TCA  | CC(C)(C)OC(=O)CCC(C(=O)O)NC(=O)OCC1C  | 71989-18-9   |
| 190 | Cycle 1 | CGACATCTTAG | AGGATGTCGCA   | CC(C)(C)OC(=O)CC(C(=O)O)NC(=O)OCC1C2= | 71989-14-5   |
| 191 | Cycle 1 | CGAGGAGTTAG | AACTCC TCGCA  | C1=CC=C2C(=C1)C(C3=CC=CC=C3)COC(=     | 29022-11-5   |
| 192 | Cycle 1 | AAATCAGCCAG | GGCTGAT T TCA | CCC(C)(C(=O)O)NC(=O)OCC1C2=CC=CC=C    | 71989-23-6   |
| 193 | Cycle 1 | GATCCACATAG | ATGTGGATCCA   | COC(=O)CC(C(=O)O)NC(=O)OCC1C2=CC=C    | 145038-53-5  |
| 194 | Cycle 1 | ggttaaaggAG | cccttAACCA    | CC(C)(C)OCC(C(=O)O)NC(=O)OCC1C2=CC=C  | 71989-33-8   |
| 195 | Cycle 1 | cttgaccagAG | ctggtcaagCA   | CC(C(=O)O)NC(=O)OCC1C2=CC=CC=C2C3=    | 79990-15-1   |
| 196 | Cycle 1 | gggctgtaaAG | ttacagcccCA   | CC(C)CC(C(=O)O)NC(=O)OCC1C2=CC=CC=C   | 114360-54-2  |
| 197 | Cycle 1 | ggtgaagtAG  | acattcaccCA   | CSCCC(C(=O)O)NC(=O)OCC1C2=CC=CC=C     | 112883-40-6  |
| 198 | Cycle 1 | actcctctAG  | agagggagtCA   | C1=CC=C(C=C1)CC(C(=O)O)NC(=O)OCC2C3   | 86123-10-6   |
| 199 | Cycle 1 | tacacgtgAG  | cagcgtgtaCA   | CCCC(C(=O)O)NC(=O)OCC1C2=CC=CC=C      | 112883-41-7  |
| 200 | Cycle 1 | gctttgtgAG  | acacaaagcCA   | CC(C)(C)OC(=O)CCC(C(=O)O)NC(=O)OCC1C  | 104091-08-9  |
| 201 | Cycle 1 | ttgaaggcaAG | tgccctcaaCA   | CC(C)C(C(=O)O)NC(=O)OCC1C2=CC=CC=C    | 84624-17-9   |
| 202 | Cycle 1 | ctgcactaaAG | ttagtgcagCA   | CC(C(C(=O)O)NC(=O)OCC1C2=CC=CC=C2C    | 138797-71-4  |
| 203 | Cycle 1 | tgggctctaAG | tagagcccaCA   | CC(C)(C)OC1=CC=C(C=C1)CC(C(=O)O)NC(=  | 118488-18-9  |
| 204 | Cycle 1 | agaccatctAG | agatggtctCA   | C1CC(N(C1)C(=O)OCC2C3=CC=CC=C3C4=C    | 101555-62-8  |
| 205 | Cycle 1 | ccgatgattAG | aatcatcggCA   | C1=CC=C(C=C1)CCC(C(=O)O)NC(=O)OCC2C   | 135994-09-1  |
| 206 | Cycle 1 | caatgtggcAG | gccacattgCA   | C1=CC=C2C(=C1)C(C3=CC=CC=C3)COC(=     | 35737-10-1   |
| 207 | Cycle 1 | attagccgaAG | tcggtctaaCA   | C1CCC(CC1)CC(C(=O)O)NC(=O)OCC2C3=CC   | 135673-97-1  |
| 208 | Cycle 1 | gtacgtacAG  | gtacgcataCA   |                                       | C            |
| 209 |         |             |               |                                       |              |
| 210 | Cycle 2 | tagcttgcGT  | agcaagctaCT   | C#CC[C@H](NC(OCC1C2=CC=CC=C2C3=       | 332064-94-5  |
| 211 | Cycle 2 | ggatgaactGT | aggtcatocCT   | FC=1C=CC(=CC1)C[C@H](CC(O)=O)NC(OCC   | 331763-70-3  |
| 212 | Cycle 2 | tccatggtaGT | taccatggaCT   | N#CC=1C=CC(=CC1)C[C@H](CC(O)=O)NC     | 270065-90-2  |
| 213 | Cycle 2 | cacaaaaccGT | ggttttgtgCT   | FC1=C(F)C(F)=C(F)C(F)=C1C[C@H](CC(O)= | 270063-43-9  |
| 214 | Cycle 2 | gatgtaacgGT | cgtttacacCT   | C#CC[C@H](NC(OCC1C2=CC=CC=C2C3=CC     | 1217669-02-7 |
| 215 | Cycle 2 | tgtcttggGT  | accaagacaCT   | FC1=C(F)C(F)=C(F)C(F)=C1C[C@H](CC(O)= | 269398-94-9  |
| 216 | Cycle 2 | aagagtgccGT | ggcactcttCT   | O=C(O)[C@H]1C[C@H](C=C1)NC(OCC2C3=C   | 220497-64-3  |
| 217 | Cycle 2 | ggatcctaGT  | tgaggatocCT   | C1C1=CC2=C(C=C1)C(C[C@H](C(O)=O)NC(O  | 925916-73-0  |
| 218 | Cycle 2 | acattcggaGT | tcgaaatgCT    | N#CC=1C=CC(=CC1)C[C@H](CC(O)=O)NC     | 269726-87-6  |
| 219 | Cycle 2 | ccctgggtaGT | tacccaaggCT   | O=C(O)[C@H](NC(OCC1C2=CC=CC=C2C3=     | 269078-73-1  |
| 220 | Cycle 2 | agccatctgGT | cagatggctCT   | C1=CC=C2CN([C@H](CC2=C1)C(=O)O)C(=    | 136030-33-6  |
| 221 | Cycle 2 | acctctggGT  | ccagaaggCT    | C1C=1C=CC(=CC1)C[C@H](C(O)=O)NC(OCC   | 142994-19-2  |
| 222 | Cycle 2 | aggccataaGT | ttatggcctCT   | N#CC=1C=CC(=CC1)C[C@H](C(O)=O)NC(O    | 205526-34-7  |
| 223 | Cycle 2 | gagaacagtGT | actgttctcCT   | C1=CC=C2C(=C1)C3=CC=CC=C3C2COC(=O     | 101555-63-9  |
| 224 | Cycle 2 | acagatcacGT | gtgatctgCT    | O=C(O)[C@H](NC(OCC1C2=CC=CC=C2C3=C    | 198543-96-3  |
| 225 | Cycle 2 | acactgctcGT | gagcagtgtCT   | O=C(O)[C@H](NC(OCC1C2=CC=CC=C2C3=C    | 269078-72-0  |
| 226 | Cycle 2 | ataacctccGT | ggaggttatCT   | O=C([C@H]1C[C@H](NC(OCC2C3=C(C4=C     | 220497-66-5  |
| 227 | Cycle 2 | aagcaaggGT  | cccttgcctCT   | C1=CC=C2C(=C1)C3=CC=CC=C3C2COC(=O     | 193693-64-0  |
| 228 | Cycle 2 | ttgtttccgGT | cggaacaaCT    | C1=CC=C2C(=C1)C3=CC=CC=C3C2COC(=O     | 129223-22-9  |
| 229 | Cycle 2 | tcttggagcGT | gctccaagaCT   | O=C(O)[C@H](CC1=CSC=C1)NC(OCC2C3=C    | 186320-06-9  |
| 230 | Cycle 2 | caatgctgtGT | acagcattgCT   | C1C1=CC2=C(C=C1)C(C[C@H](C(O)=O)NC    | 908847-42-7  |
| 231 | Cycle 2 | gacattgacGT | gtcaatgtcCT   | O=C(O)[C@H](CC1=CSC=N1)NC(OCC2C3=C    | 205528-32-1  |
| 232 | Cycle 2 | ggttcaactGT | agttgaaccCT   | CN([C@H](CC1CCCC1)C(=O)O)C(=O)OCC     | 148983-03-3  |
| 233 | Cycle 2 | ataagctcgGT | cgacctatCT    | O=C(O)[C@H](CC1=CC=CO1)NC(OCC2C3=C    | 159611-02-6  |
| 234 | Cycle 2 | tgaggagtAT  | atactccaCT    | O=C(O)[C@H](NC(OCC1C2=CC=CC=C2C3=C    | 205526-38-1  |
| 235 | Cycle 2 | taacgtgcGT  | gcagcgttaCT   | O=C(O)C1CCC(CC1)CNC(OCC2C3=CC=CC=C    | 188715-40-4  |
| 236 | Cycle 2 | ccagtactgGT | cagtactggCT   | C=CCC(C(O)=O)NC(OCC1C2=CC=CC=C2C3     | 1311992-97-8 |
| 237 | Cycle 2 | actaaggggGT | ccccttagCT    | O=C(O)C[C@H](C1=CC([N+])([O-])=O)CC=C | 374791-04-5  |
| 238 | Cycle 2 | cttcttggGT  | ccaagaagCT    | NC(NCCC[C@H](C(O)=O)NC(OCC1C2=CC=C    | 200344-33-8  |
| 239 | Cycle 2 | agtcagctGT  | aagctgactCT   | O=C(O)C[C@H](C1=CC=C(Br)C=C1)NC(OCC   | 220498-04-4  |
| 240 | Cycle 2 | gtctatgctGT | gacatgacCT    | CC1=CC=CC=C1[C@H](NC(OCC2C3=CC=CC=C   | 507472-27-7  |

|     |         |              |             |                                       |              |
|-----|---------|--------------|-------------|---------------------------------------|--------------|
| 241 | Cycle 2 | taggtgctcGT  | gagcacctaCT | O=C(O)C[C@H](C1=CC=C(C(F)F)C=C1)NC    | 517905-88-3  |
| 242 | Cycle 2 | tctgggagaGT  | tctccagaCT  | O=C(O)CC(C1=CC=C(Br)C=C1)NC(OCC2C3=   | 269078-76-4  |
| 243 | Cycle 2 | tgctgagtGT   | acatcagcaCT | CC1=CC=C(C(NC(OCC2C3=CC=CC=C3C4=C     | 284492-08-6  |
| 244 | Cycle 2 | ctgacatacGT  | gtatgtcagCT | C1=CC=C(C=C1)C[C@@H](C(=O)N2CCC[C@    | 138372-76-6  |
| 245 | Cycle 2 | cgatgtcctGT  | aggacatcgCT | C=CCC(NC(OCC1C2=CC=CC=C2C3=CC=CC      | 221884-63-5  |
| 246 | Cycle 2 | tcgcgagaGT   | ttctcgcgaCT | C1CCC2C(C1)C[C@H](C(=O)O)N2C(=O)OCC   | 1217512-55-4 |
| 247 | Cycle 2 | gaaatggggGT  | ccccattcCT  | O=C(O)C[C@H](CC1=CC=CS1)NC(OCC2C3=    | 270262-98-1  |
| 248 | Cycle 2 | gctaactcGT   | gaagttagcCT | C=CC[C@@H](NC(OCC1C2=CC=CC=C2C3=      | 170642-28-1  |
| 249 | Cycle 2 | caccacgtGT   | aacgtggtgCT | C#CCCC[C@@H](C(=O)O)NC(=O)OCC1C2=C    | 1097192-05-6 |
| 250 | Cycle 2 | ttctagtggGT  | ccactagaaCT | FC1=C(F)C(F)=C(F)C(F)=C1C[C@@H](C(O)= | 205526-32-5  |
| 251 | Cycle 2 | atatggtccGT  | ggacatatCT  | CC1=CC=C(C[C@H](NC(OCC2C3=CC=CC=C     | 199006-54-7  |
| 252 | Cycle 2 | ctcgcagatGT  | tactcagagCT | CC1=C(C(C)=CC(O)=C1)C[C@H](NC(OCC2C   | 206060-54-0  |
| 253 | Cycle 2 | acacctcaGT   | tgaaggtctCT | O=C(O)[C@H](CC1=CSC2=CC=CC=C12)NC(    | 177966-60-8  |
| 254 | Cycle 2 | catgaggagaGT | tcctcatgCT  | O=C([C@H])N(C(OCC2C3=C(C4=C2C=CC=C    | 130309-37-4  |
| 255 | Cycle 2 | aggcctagaGT  | tctaggcctCT | O=C(O)C1=CC=CC(NC(OCC2C3=CC=CC=C      | 155369-11-2  |
| 256 | Cycle 2 | gtttaccaGT   | tggtagaacCT | FC1=CC(C[C@H](C(O)=O)NC(OCC2C3=CC=    | 205526-31-4  |
| 257 | Cycle 2 | catgctcgaGT  | tcgacatgCT  | C1C=1C=CC(=CC1C1)C[C@@H](C(O)=O)NC(   | 177966-59-5  |
| 258 | Cycle 2 | cctagagctGT  | agctcaggCT  | C1=CC=C2C(C=C1)C3=CC=CC=C3C2COC(=     | 885951-89-3  |
| 259 | Cycle 2 | ccccgtaaaGT  | tttaccgggCT | IC=1C=CC(=CC1)C[C@@H](C(O)=O)NC(OCC   | 82565-68-2   |
| 260 | Cycle 2 | tcggccaatGT  | attggccgaCT | IC=1C=CC(=CC1)C[C@H](C(O)=O)NC(OCC2   | 205526-29-0  |
| 261 | Cycle 2 | caagccctGT   | aggccttgCT  | C1=CC=C2C(C=C1)C[C@@H](C(=O)O)N2C(=O  | 198560-38-2  |
| 262 | Cycle 2 | ggctacaatGT  | attgtagccCT | O=[N+]([O-])C=1C=CC(=C(C1))N+[O-]N    | 140430-54-2  |
| 263 | Cycle 2 | gagtccttGT   | aaaggactCT  | O=C(O)[C@H](CC1=CSC2=CC=CC=C12)NC(    | 177966-61-9  |
| 264 | Cycle 2 | ctgtttgGT    | caacaacagCT | O=C(O)[C@H](CC1CC1)NC(OCC2C3=CC=CC    | 214750-76-2  |
| 265 | Cycle 2 | gactgatgcGT  | cgatcagtcCT | O=C(O)C[C@H](CC1=CC=C(O)NC(OCC2C3=    | 270263-07-5  |
| 266 | Cycle 2 | acacgacaGT   | ctgtcgtctCT | O=C(O)C1(NC(OCC2C3=CC=CC=C3C4=CC=     | 162648-54-6  |
| 267 | Cycle 2 | ttttcgtcGT   | cagcgaaaaCT | FC1=CC2=C(C=C1)C(C(C(O)=O)NC(OCC3C    | 1219392-55-8 |
| 268 | Cycle 2 | gtgttgtgtGT  | acacaacacCT | C1C=1C=CC(=CC1C1)C[C@H](C(O)=O)NC(OC  | 177966-58-4  |
| 269 | Cycle 2 | ttggcgatGT   | atccgccaCT  | BrC=1C=CC(=CC1)C[C@@H](C(O)=O)NC(OC   | 198561-04-5  |
| 270 | Cycle 2 | tactaggtGT   | gacctagtaCT | O=[N+]([O-])C=1C=CC(=CC1)C[C@H](C(O)= | 177966-63-1  |
| 271 | Cycle 2 | cgtagcgtGT   | aacgtaccCT  | O=C(O)C[C@@H](NC(OCC1C2=CC=CC=C2C     | 1217460-65-5 |
| 272 | Cycle 2 | gacgaatgaGT  | tcattcgtcCT | O=C(O)[C@H](CC1=CN=CC=C1)NC(OCC2C     | 142994-45-4  |
| 273 | Cycle 2 | atggttgtGT   | cacaacacCT  | O=C(O)[C@H](NC(OCC1C2=CC=CC=C2C3=     | 220497-61-0  |
| 274 | Cycle 2 | gcagttcaGT   | tgaactgcCT  | O=C(O)C=1C=CC(=CC1)CNC(OCC2C3=CC=     | 164470-64-8  |
| 275 | Cycle 2 | tactgagtGT   | gactcagtaCT | O=C(O)C1(CCCC1)NC(OCC2C3=CC=CC=C3     | 117322-30-2  |
| 276 | Cycle 2 | tatgcactcGT  | gagtcagcaCT | O=C(O)C1(CCC1)NC(OCC2C3=CC=CC=C3C     | 885951-77-9  |
| 277 | Cycle 2 | tggcctacaGT  | tgtagccaCT  | FC(F)C=1C=CC(=CC1)C[C@@H](C(O)=O)     | 247113-86-6  |
| 278 | Cycle 2 | gagcgagtaGT  | tactcctcCT  | C1=CC=C2C(C=C1)C3=CC=CC=C3C2COC(=     | 178432-49-0  |
| 279 | Cycle 2 | ggcttttcGT   | gaaaagaccCT | COC1=C(OC)C=C(C[C@H](NC(OCC2C3=CC=    | 184962-88-7  |
| 280 | Cycle 2 | gttcttgagGT  | ctcaagaacCT | O=C(O)[C@H](CC1=CC=CS1)NC(OCC2C3=C    | 130309-35-2  |
| 281 | Cycle 2 | tcaccgtaGT   | tagcgtggaCT | OC=1C=CC2=C(C1)C(=CN2)C[C@@H](C(O)=   | 178119-94-3  |
| 282 | Cycle 2 | ttctgctcaGT  | tgagcagaaCT | O=C(O)[C@H]1CCC[C@@H]1NC(OCC2C3=C     | 359586-64-4  |
| 283 | Cycle 2 | ggggataaaGT  | tttatccccCT | O=C(O)C[C@H](CC1=CSC=C1)NC(OCC2C3=    | 270263-01-9  |
| 284 | Cycle 2 | gtccgaaaGT   | tttccggacCT | O=C(O)C1(CCOCC1)NC(OCC2C3=CC=CC=C     | 285996-72-7  |
| 285 | Cycle 2 | taaagaggGT   | cccttttaCT  | O=C(O)[C@H](C1=CSC=C1)NC(OCC2C3=CC    | 1217706-09-6 |
| 286 | Cycle 2 | cttgccactGT  | agtgccaaCT  | O=C(O)C1(CC1)NC(OCC2C3=CC=CC=C3C4=    | 126705-22-4  |
| 287 | Cycle 2 | atgagtcagGT  | ctgactcatCT | C1=CC=C2C(C=C1)C3=CC=CC=C3C2COC(=     | 185116-43-2  |
| 288 | Cycle 2 | tcctctggtGT  | accagaggaCT | C#CC[C@@H](NC(OCC1C2=CC=CC=C2C3=      | 220497-98-3  |
| 289 | Cycle 2 | accgctaaGT   | ttagcgggtCT | C#CC[C@H](NC(OCC1C2=CC=CC=C2C3=CC     | 198561-07-8  |
| 290 | Cycle 2 | catagagcGT   | gctcctatCT  | C1C=1C=CC(=C(C1)C1)C[C@@H](C(O)=O)NC  | 352351-62-3  |
| 291 | Cycle 2 | tcgctagtGT   | aaactagcaCT | FC1=CC(C[C@H](C(O)=O)NC(OCC2C3=CC     | 205526-30-3  |
| 292 | Cycle 2 | acatccgaGT   | tgcggatgtCT | O=C(O)[C@H](CC1=CN=CC=C1)NC(OCC2C3    | 175453-07-3  |
| 293 | Cycle 2 | gataccaagGT  | cttggtatcCT | O=C(O)[C@H](NC(OCC1C2=CC=CC=C2C3=     | 136555-16-3  |
| 294 | Cycle 2 | cagtcacctGT  | aggtgactgCT | O=C(O)[C@@H](NC(OCC1C2=CC=CC=C2C3     | 138775-07-2  |
| 295 | Cycle 2 | gctttgctcGT  | gagcaaacCT  | FC(F)C(NCCCC[C@@H](C(O)=O)NC(OCC      | 76265-69-5   |
| 296 | Cycle 2 | ttccgagaaGT  | ttctcgaaCT  | O=C(CC[C@H](NC(OCC1C2=CC=CC=C2C3=     | 150047-85-1  |
| 297 | Cycle 2 | caccaggtGT   | aactcgtgtCT | [N-]=[N+]=NCCC[C@@H](C(O)=O)NC(OCC1C  | 1097192-04-5 |
| 298 | Cycle 2 | cttactagGT   | cgtagtaagCT | C#CC[C@](C(O)=O)(NC(OCC1C2=CC=CC=C    | 1198791-65-9 |
| 299 | Cycle 2 | tcggaagtGT   | acattccgaCT | C[C@@H](OCC1=CC=CC=C1)[C@H](NC(OC     | 117872-75-0  |
| 300 | Cycle 2 | gagcatcgtGT  | acgatgctcCT | O=C(O)C[C@H](C1=CC=C([N+]([O-])O)C=C  | 507472-26-6  |



|     |         |              |              |                                       |              |
|-----|---------|--------------|--------------|---------------------------------------|--------------|
| 301 | Cycle 2 | aafactcgtGT  | cgacttattCT  | COC1=CC(OC)=CC([C@H](NC(OCC2C3=CC=    | 511272-41-6  |
| 302 | Cycle 2 | ttgttcacgGT  | cgtgaacaaCT  | O=C(O)C[C@H](C1=CN=CC=C1)NC(OCC2C3    | 511272-43-8  |
| 303 | Cycle 2 | cttaccactGT  | agtggtaagCT  | O=C(O)C[C@H](C1=CC=CS1)NC(OCC2C3=C    | 511272-45-0  |
| 304 | Cycle 2 | catcactcgtGT | ggactgatgCT  | O=C(O)C[C@H](C1=CC=CO1)NC(OCC2C3=C    | 1217662-55-9 |
| 305 | Cycle 2 | ttctcagagaGT | ttctcagagaCT | CC(C1=CC=C(C[C@H](NC(OCC2C3=CC=CC     | 204716-07-4  |
| 306 | Cycle 2 | attaccggcGT  | gccgtaatCT   | O=C(O)C1=CC(NC(OCC2C3=CC=CC=C3C4=     | 1071446-05-3 |
| 307 | Cycle 2 | aggacaatcGT  | gattgtcctCT  | C1(C2=C(C=CC=C2)C3=C1C=CC=C3)COC(N    | 1260596-73-3 |
| 308 | Cycle 2 | aaggtagcaGT  | tgctaccttCT  | O=C(O)[C@H](CC1=CNC2=C1C=CC=N2)NC(    | 737007-45-3  |
| 309 | Cycle 2 | tagactcggGT  | ocgagtctaCT  | N1([C@H](C(=O)O)C[C@H](C1)F)C(=O)OCC1 | 1228307-81-0 |
| 310 | Cycle 2 | gctcacataGT  | tatgtgagcCT  | FC1=CC(C[C@H](C(O)=O)NC(OCC2C3=CC=    | 205526-25-6  |
| 311 | Cycle 2 | gttaaggacGT  | gtccttaacCT  | FC=1C=CC(=C(C1)F)C[C@H](C(O)=O)NC(    | 1032337-49-7 |
| 312 | Cycle 2 | ggctctagtGT  | actagagccCT  | C1=CC=C2C(=C1)C3=CC=CC=C3C2COC(=O     | 133054-21-4  |
| 313 | Cycle 2 | acgttcacGT   | gatgaactCT   | C1(C2=C(C=CC=C2)C3=C1C=CC=C3)COC(N    | 1217716-50-1 |
| 314 | Cycle 2 | gaccaatcGT   | gattgggtcCT  | O=C(O)C1NC(OCC2C3=CC=CC=C3C4=CC=      | 135944-07-9  |
| 315 | Cycle 2 | gcgctttatGT  | ataaagcgcCT  | O=C(O)[C@H](CC1CCC1)NC(OCC2C3=CC=C    | 478183-62-9  |
| 316 | Cycle 2 | gatagcgaGT   | tcgctatcCT   | O=C(O)[C@@H]1CC[C@H]1NC(OCC2C3=C      | 359586-69-9  |
| 317 | Cycle 2 | gatagctcGT   | gagcatatcCT  | O=C(O)CC1NC(OCC2C3=CC=CC=C3C4=CC      | 282524-98-5  |
| 318 | Cycle 2 | aggagttagcGT | gctactcctCT  | O=C(O)CC1(CNC(OCC2C3=CC=CC=C3C4=C     | 882847-19-0  |
| 319 | Cycle 2 | gaccagatGT   | atcctggtcCT  | O=C(O)[C@@H]1CC[C@H](CC1)CNC(OCC2C    | 167690-53-1  |
| 320 | Cycle 2 | cgaggttacGT  | gtaacctcgCT  | O=[N+](=[O-])C=1C=CC(=CC1)C[C@H](C(O) | 95753-55-2   |
| 321 | Cycle 2 | agacaatggGT  | ccattgtctCT  | C1=CC=C2C(=C1)C3=CC=CC=C3C2COC(=O     | 86069-86-5   |
| 322 | Cycle 2 | tgcatgtgGT   | cacatgccaCT  | O=C(O)[C@@H]1CC[C@H](CC1)NC(OCC2C3    | 147900-46-7  |
| 323 | Cycle 2 | gtcaatggcGT  | gccattgacCT  | CC1(OCC2=C(O1)C=CC(C[C@H](NC(OCC3C    | 252049-13-1  |
| 324 | Cycle 2 | cctctacaGT   | tgtaggaggCT  | IC=1C=CC(=CC1)C[C@H](CC(O)=O)NC(OCC   | 269396-73-8  |
| 325 | Cycle 2 | tgctgaggaGT  | ttctcagcaCT  | BrC=1C=CC(=CC1)C[C@H](CC(O)=O)NC(     | 270062-86-7  |
| 326 | Cycle 2 | ataccgtccGT  | ggacggatcCT  | C1C=1C=CC(=CC1)C[C@H](CC(O)=O)NC      | 270063-52-0  |
| 327 | Cycle 2 | tgacagaggGT  | cctctgtcaCT  | IC=1C=CC(=CC1)C[C@H](CC(O)=O)NC(OC    | 270065-72-0  |
| 328 | Cycle 2 | gcgtatcatGT  | atgatacgcCT  | O=C(O)C[C@H](CC1=CNC2=CC=CC=C12)NC    | 353245-98-4  |
| 329 | Cycle 2 | atctacctGT   | gaggtagatCT  | O=C(O)C[C@@H](C1=CC=C(F)C=C1)NC(OC    | 479064-89-6  |
| 330 | Cycle 2 | tcgatccacGT  | gtgaatcgaCT  | O=C(O)C[C@@H](C1=C(C1)C(C1)=CC=C1)NC  | 501015-35-6  |
| 331 | Cycle 2 | ttcaaaagGT   | accttggacCT  | O=C(O)C[C@H](C1=C(C1)C=C(C1)C=C1)NC(  | 511272-37-0  |
| 332 | Cycle 2 | ataaccaggGT  | cctggttatCT  | O=C(O)[C@@H](NC(OCC1C2=CC=CC=C2C3     | 161321-36-4  |
| 333 | Cycle 2 | agcaacttgGT  | caagttgctCT  | O=C(O)[C@@H](NC(OCC1C2=CC=CC=C2C3     | 205526-26-7  |
| 334 | Cycle 2 | tgatcgacGT   | gtcgatccaCT  | FC=1C=CC(=CC1F)C[C@H](C(O)=O)NC(OC    | 198545-59-4  |
| 335 | Cycle 2 | taccgggtaGT  | taccgggtaCT  | FC=1C=CC(=CC1)C[C@H](C(O)=O)NC(OC     | 169243-86-1  |
| 336 | Cycle 2 | gcatcaagGT   | cttgatggcCT  | C1=CC=C2CN([C@H](CC2=C1)C(=O)O)C(=O   | 130309-33-0  |
| 337 | Cycle 2 | ctaagccacGT  | gtggcttagCT  | O=C(O)[C@H](NC(OCC1C2=CC=CC=C2C3=C    | 205526-22-3  |
| 338 | Cycle 2 | tggtcttcGT   | gaaagcccaCT  | N#CC=1C=CC(=CC1)C[C@H](C(O)=O)NC(     | 173963-93-4  |
| 339 | Cycle 2 | cgtagtggaGT  | tcacctacgCT  | CC(C)OC(N1CCCC(C1)CC(NC(OCC2C3=CC=    | 457060-97-8  |
| 340 | Cycle 2 | ggattccaGT   | tggaataccCT  | C[C@H]1(CCCN1C(=O)OCC2C3=CC=CC=C3C    | 167275-47-0  |
| 341 | Cycle 2 | tacattcccGT  | gggaatgtaCT  | C(F)C1=CC=C(C[C@H](C(O)=O)NC(=O)OC    | 1808268-08-7 |
| 342 | Cycle 2 | cgtatcagGT   | cttgatagcCT  | C1CN(C[C@H](C(=O)O)NC(OCC2C3=C(C4=    | 1251903-85-1 |
| 343 | Cycle 2 | gagtgatagGT  | ctatcactcCT  | C1=CC=C2C(=C1)C3=CC=CC=C3C2COC(=O     | 193693-61-7  |
| 344 | Cycle 2 | actgctaacGT  | gttagcagtCT  | C1=CC=C2C(=C1)C3=CC=CC=C3C2COC(=O     | 374791-02-3  |
| 345 | Cycle 2 | actctcgtGT   | acagagagtCT  | O=C(O)C1NC(OCC2C3=CC=CC=C3C4=CC=      | 214139-28-3  |
| 346 | Cycle 2 | acattgcgaGT  | tcgcaatgtCT  | C1=CC=C2C(=C1)CN(C2C(=O)O)C(=O)OCC3   | 204320-59-2  |
| 347 | Cycle 2 | ctattctgcGT  | gcagaatagCT  | O=C(O)[C@@H](NC(OCC1C2=CC=CC=C2C3     | 159610-82-9  |
| 348 | Cycle 2 | acgctagtGT   | cactagcgtCT  | C1CC([C@H]2[C@@H](C1)C[C@H](C(=O)O)   | 214750-71-7  |
| 349 | Cycle 2 | atcgggatcGT  | gatcccgatCT  | CC(C)C)OC(=O)N1CCN(C1C(=O)O)C(=O)OC   | 207129-12-2  |
| 350 | Cycle 2 | actctcgtGT   | agcagagagtCT | C1(C2=C(C=CC=C2)C3=C1C=CC=C3)COC(N    | 683217-64-3  |
| 351 | Cycle 2 | taagtggctGT  | agocacttaCT  | FC=1C=CC(=CC1F)C[C@H](C(O)=O)NC(OC    | 198560-43-9  |
| 352 | Cycle 2 | aaccagcttGT  | aagctggttCT  | CC1=CC=CC=C1C[C@H](NC(OCC2C3=CC=C     | 211637-75-1  |
| 353 | Cycle 2 | agaagtggGT   | accacttctCT  | FC(F)C=1C=CC(=CC1)C[C@H](C(O)=O)NC    | 238742-88-6  |
| 354 | Cycle 2 | atgaacacGT   | cgtgttcatCT  | C1=CC=C2C(=C1)C3=CC=CC=C3C2COC(=O     | 139262-20-7  |
| 355 | Cycle 2 | aagttggtGT   | accaaccttCT  | O=C(O)[C@H]1C[C@H](CC1)NC(OCC2C3=C    | 220497-67-6  |
| 356 | Cycle 2 | acactaccGT   | ggagtaggtCT  | CC(C)OC(N1C[C@H](C(O)=O)[C@H](NC(O    | 267230-44-4  |
| 357 | Cycle 2 | gagggaacaGT  | tgttccctcCT  | C1=CC=C2C(=C1)C3=CC=CC=C3C2COC(=O     | 1335206-44-4 |
| 358 | Cycle 2 | ctgtctaacGT  | gttagacagCT  | C=CCC[C@@H](NC(OCC1C2=CC=CC=C2C3      | 865352-21-2  |
| 359 | Cycle 2 | ctgccaatGT   | atttggcagCT  | C1=CC=C2C(=C1)C3=CC=CC=C3C2COC(=O     | 942153-03-9  |
| 360 | Cycle 2 | cgggatacaGT  | tgatcccgtCT  | O=C(O)[C@H](C1CC1)NC(OCC2C3=CC=CC=    | 1212257-18-5 |

|     |         |             |              |                                         |              |
|-----|---------|-------------|--------------|-----------------------------------------|--------------|
| 361 | Cycle 2 | cactacaggGT | cctgtagtGT   | CC(C)OC(N1CCC(C(NC(OCC2C3=CC=CC=C       | 313051-96-6  |
| 362 | Cycle 2 | tttccatggGT | ccatggaaaCT  | CC(C)OC(N1CCC(C(NC(OCC2C3=CC=CC=C       | 372144-11-1  |
| 363 | Cycle 2 | actcacctgGT | cagggtgagtCT | O=C(O)C[C@@H](C1=CC=C(C#N)C=C1)NC(      | 507472-24-4  |
| 364 | Cycle 2 | ggacctgtaGT | tacacgtccCT  | CN1C=C(C2=CC=CC=C2)C[C@@H](NC(OC        | 168471-22-5  |
| 365 | Cycle 2 | gttagggacGT | gtccctaacCT  | FC(F)F)C=1C=CC(=CC1)C[C@@H](CC(O)=      | 270065-81-1  |
| 366 | Cycle 2 | cataggtacGT | gtacctatgCT  | FC1=CC=CC(C[C@H](CC(O)=O)NC(OCC2C3      | 331763-67-8  |
| 367 | Cycle 2 | aagctagcgGT | cgctagcttCT  | N#CC1=CC=CC(C[C@H](CC(O)=O)NC(OCC2      | 269726-84-3  |
| 368 | Cycle 2 | gatcttgtGT  | acgaagatcCT  | O=C(O)C[C@H](NC(OCC1C2=CC=CC=C2C3=      | 268734-29-8  |
| 369 | Cycle 2 | tgactcgcaGT | tgcgagtcaCT  | C1=CC=C2C(=C1)C3=CC=CC=C3C2COC(=O       | 193693-60-6  |
| 370 | Cycle 2 | gaaagtctcGT | gagacttctCT  | C1=CC=C2CN([C@H](CC2=C1)CC(=O)O)C(=     | 332064-67-2  |
| 371 | Cycle 2 | tgagcgagtGT | actcgctcaCT  | C1C=1C=CC(=CC1)C[C@H](CC(O)=O)NC(OC     | 331763-60-1  |
| 372 | Cycle 2 | actgttaccGT | ggtaccagtCT  | C1C=1C=CC(=C(C1)C1)C[C@@H](CC(O)=O)N    | 270063-49-5  |
| 373 | Cycle 2 | gctagcttGT  | aagctacgcCT  | C1C=1C=CC(=C(C1)C1)C[C@H](CC(O)=O)NC    | 269396-54-5  |
| 374 | Cycle 2 | cgggaaatcGT | gattcccgtCT  | FC=1C=CC(=CC1)C[C@@H](CC(O)=O)NC(OC     | 270062-83-4  |
| 375 | Cycle 2 | tctgaaaggGT | ccittcagaCT  | O=C(O)C[C@H](CC1=CC=CS1)NC(OCC2C3=      | 269726-90-1  |
| 376 | Cycle 2 | catccttacGT | gtaagatgCT   | O=C(O)C[C@H](CC1=CSC2=CC=CC=C12)NC      | 270063-46-2  |
| 377 | Cycle 2 | ttctgctacGT | gtagcagaaCT  | BrC=1C=CC(=CC1)C[C@H](CC(O)=O)NC(OC     | 331763-76-9  |
| 378 | Cycle 2 | tgtaccagtGT | actgttacaCT  | C1C=1C=CC(=CC1)C[C@@H](CC(O)=O)NC(OC    | 270596-43-5  |
| 379 | Cycle 2 | ttctcggttGT | aaccggagaCT  | C1C=1C=CC(=CC1)C[C@H](CC(O)=O)NC(OC     | 269396-57-8  |
| 380 | Cycle 2 | gcitttgggGT | cccaaaagcCT  | FC(F)F)C=1C=CC(=CC1)C[C@H](CC(O)=O)N    | 269726-78-5  |
| 381 | Cycle 2 | acttcaacGT  | gttgagagtCT  | O=C(O)C[C@H](C1=CC=C(C1)C=C1)NC(OCC     | 479064-92-1  |
| 382 | Cycle 2 | cagttctcGT  | gaagaactgCT  | O=C(O)C[C@H](C1=CC(C1)=CC=C1)NC(OCC     | 511272-53-0  |
| 383 | Cycle 2 | cttgctggGT  | ccaagcaagCT  | C1CCC(C1)C[C@H](C(=O)O)NC(=O)OCC2C3=    | 1262802-59-4 |
| 384 | Cycle 2 | gtatgttccGT | ggaacatacCT  | C=CC[C@H](NC(OCC1C2=CC=CC=C2C3=C        | 146549-21-5  |
| 385 | Cycle 2 | gocgtatatGT | ataacagcCT   | O=[N+](=[O-])C=1C=CC(=CC1)C[C@H](CC(O)= | 269398-78-9  |
| 386 | Cycle 2 | ttcgagcttGT | aagctcgaaCT  | O=[N+](=[O-])C=1C=CC(=CC1)C[C@H](CC(O)= | 270062-88-9  |
| 387 | Cycle 2 | aaaccgtgGT  | caaccgttCT   | CC(=O)NCS[C@@H](C(=O)O)NC(=O)OCC1C      | 86060-81-3   |
| 388 | Cycle 2 | acactgcttGT | aacgagtgtCT  | CC(C)C)OC(=O)NCCCC[C@@H](C(=O)O)NC      | 71989-26-9   |
| 389 | Cycle 2 | agcaaagctGT | agctttgctCT  | C1C[C@H](N(C1)C(=O)OCC2C3=CC=CC=C3      | 71989-31-6   |
| 390 | Cycle 2 | agacaacagGT | ctgttgtctCT  | CC(C(C(=O)O)NC(=O)OCC1C2=CC=CC=C2C      | 71989-35-0   |
| 391 | Cycle 2 | tggatagcaGT | tcgtatccaCT  | CSCCC(C(=O)O)NC(=O)OCC1C2=CC=CC=C       | 71989-28-1   |
| 392 | Cycle 2 | tcttgccgaGT | ttccgaagaCT  | CC(C)C)OCC(C(=O)O)NC(=O)OCC1C2=CC=C     | 128107-47-1  |
| 393 | Cycle 2 | gagacatacGT | gtatgtctcCT  | CC(C)C(C(=O)O)NC(=O)OCC1C2=CC=CC=C      | 68858-20-8   |
| 394 | Cycle 2 | gttcagttgGT | caactgaacCT  | CC(C)C(C(=O)O)NC(=O)OCC1C2=CC=CC=C      | 35661-60-0   |
| 395 | Cycle 2 | tgctataccGT | ggtatagcaCT  | C1=CC=C(C=C1)CC(C(=O)O)NC(=O)OCC2C3     | 35661-40-6   |
| 396 | Cycle 2 | tgtacaccGT  | cggtgtacaCT  | CC(C(=O)O)NC(=O)OCC1C2=CC=CC=C2C3=      | 35661-39-3   |
| 397 | Cycle 2 | ctactctgGT  | gcagataggCT  | CC(C)C)OC(=O)CCC(C(=O)O)NC(=O)OCC1C     | 71989-18-9   |
| 398 | Cycle 2 | attgccaagGT | cttgccaatCT  | CC(C)C)OC(=O)CC(C(=O)O)NC(=O)OCC1C2=    | 71989-14-5   |
| 399 | Cycle 2 | ttcgatagGT  | ctatccgaaCT  | C1=CC=C2C(=C1)C(C3=CC=CC=C32)COC(=      | 29022-11-5   |
| 400 | Cycle 2 | gatgcttggGT | ccaagcatcCT  | CCC(C)C(C(=O)O)NC(=O)OCC1C2=CC=CC=C     | 71989-23-6   |
| 401 | Cycle 2 | agttagcagGT | ctgctactCT   | COC(=O)CC(C(=O)O)NC(=O)OCC1C2=CC=C      | 145038-53-5  |
| 402 | Cycle 2 | gatgccagtGT | actggcatcCT  | CC(C)C)OCC(C(=O)O)NC(=O)OCC1C2=CC=C     | 71989-33-8   |
| 403 | Cycle 2 | atcattccGT  | cggaatgatCT  | CC(C(=O)O)NC(=O)OCC1C2=CC=CC=C2C3=      | 79990-15-1   |
| 404 | Cycle 2 | tgcttgttGT  | aacaacgcaCT  | CC(C)CC(C(=O)O)NC(=O)OCC1C2=CC=CC=C     | 114360-54-2  |
| 405 | Cycle 2 | caaggagtaGT | tactcctgCT   | CSCCC(C(=O)O)NC(=O)OCC1C2=CC=CC=C       | 112883-40-6  |
| 406 | Cycle 2 | acttgcaacGT | gttgcaactCT  | C1=CC=C(C=C1)CC(C(=O)O)NC(=O)OCC2C3     | 86123-10-6   |
| 407 | Cycle 2 | acatgaccGT  | gcgtcatgtCT  | CCCC(C(=O)O)NC(=O)OCC1C2=CC=CC=C        | 112883-41-7  |
| 408 | Cycle 2 | acgagaggaGT | ttctctgtCT   | CC(C)C)OC(=O)CCC(C(=O)O)NC(=O)OCC1C     | 104091-08-9  |
| 409 | Cycle 2 | gactgccaGT  | ttggcagtcCT  | CC(C)C(C(=O)O)NC(=O)OCC1C2=CC=CC=C      | 84624-17-9   |
| 410 | Cycle 2 | aacgacgacGT | gtcgtgttCT   | CC(C(C(=O)O)NC(=O)OCC1C2=CC=CC=C2C      | 138797-71-4  |
| 411 | Cycle 2 | ttctctccGT  | ggaagaaacCT  | CC(C)C)OC1=CC=C(C=C1)CC(C(=O)O)NC(=     | 118488-18-9  |
| 412 | Cycle 2 | acggttctGT  | agcaacctgCT  | C1CC(N(C1)C(=O)OCC2C3=CC=CC=C3C4=C      | 101555-62-8  |
| 413 | Cycle 2 | gtagaccacGT | gtggtctacCT  | C1=CC=C(C=C1)CCC(C(=O)O)NC(=O)OCC2C     | 135994-09-1  |
| 414 | Cycle 2 | cagtcagtaGT | tactgactgCT  | C1=CC=C2C(=C1)C(C3=CC=CC=C32)COC(=      | 35737-10-1   |
| 415 | Cycle 2 | gtagtagtGT  | actactaccCT  | C1CCC(C1)CC(C(=O)O)NC(=O)OCC2C3=CC      | 135673-97-1  |
| 416 | Cycle 2 | tgccctaagGT | cttagggcaCT  |                                         | C            |
| 417 |         |             |              |                                         |              |
| 418 | Cycle 3 | gccttctgtGA | acgaaagcAC   | OC(=O)C1(CCC1)C2=CC=CC=C2               | 37828-19-6   |
| 419 | Cycle 3 | aacgatccaGA | tgatcggtAC   | OC(=O)CC1=CC=C(F)C=C1                   | 405-50-5     |
| 420 | Cycle 3 | actctaccGA  | ggtagagctAC  | OC(=O)C1CC1                             | 1759-53-1    |

|     |         |              |             |                                     |             |
|-----|---------|--------------|-------------|-------------------------------------|-------------|
| 421 | Cycle 3 | aacgtaagcGA  | gcttacgttAC | OC(=O)C1(CCC1)C(O)=O                | 5445-51-2   |
| 422 | Cycle 3 | tcataatcgGA  | cggtatcgAC  | OC(=O)C1CCC1                        | 3721-95-7   |
| 423 | Cycle 3 | acataaccgaGA | tcggtatgtAC | Cl.OC(=O)CC1=CC=CN=C1               | 6419-36-9   |
| 424 | Cycle 3 | agcaaggttGA  | aacctgtctAC | OC(=O)CC1=CC=C(C=C1)[N+][([O-])=O   | 104-03-0    |
| 425 | Cycle 3 | ccaagctatGA  | atagcttggAC | OC(=O)CC1=CC=C(C=C1)C(F)(F)F        | 32857-62-8  |
| 426 | Cycle 3 | tatcctaccGA  | ggtaggataAC | OC(=O)C1CCC(CC1)C(O)=O              | 1076-97-7   |
| 427 | Cycle 3 | gccaaaactGA  | agttttggcAC | OC(=O)CC1(CCCCC1)CC(O)=O            | 4355-11-7   |
| 428 | Cycle 3 | ttgtocgtgGA  | cacggacaaAC | NC1=CC(=CC=C1C(O)=O)[N+][([O-])=O   | 619-17-0    |
| 429 | Cycle 3 | cgtaggttaGA  | taacctacgAC | OC(=O)C1CCC(O)1                     | 16874-33-2  |
| 430 | Cycle 3 | tcttggggaGA  | tcccaagaAC  | OC(=O)C1CCC(=O)N1                   | 4042-36-8   |
| 431 | Cycle 3 | atagggttcGA  | gaccctatAC  | OC(=O)CC1=C(C1)C=CC=C1Cl            | 6575-24-2   |
| 432 | Cycle 3 | ctagagagaGA  | tctcttagAC  | COCl=CC=C(C(C(O)=O)C=C)ClO          | 1131-94-8   |
| 433 | Cycle 3 | tgacctagGA   | ctacggtcaAC | OC(C(O)C(O)=O)C(O)=O                | 147-71-7    |
| 434 | Cycle 3 | ccatatggcGA  | gccatatggAC | OC(=O)C=CC1=CC=CC=C1                | 140-10-3    |
| 435 | Cycle 3 | atggagagGA   | ctcctcatAC  | C[S](=O)(=O)CC(O)=O                 | 2516-97-4   |
| 436 | Cycle 3 | tcctgactGA   | agtcaaggAC  | OC(=O)C[N]1C=CN=C1                  | 22884-10-2  |
| 437 | Cycle 3 | acctggttaGA  | taaccaggtAC | Cl.OC(=O)CC1=NC=CC=C1               | 16179-97-8  |
| 438 | Cycle 3 | taccagtgtGA  | acactggtAC  | OC(=O)C1CCC(=O)N1                   | 98-79-3     |
| 439 | Cycle 3 | tctcgctatGA  | atagcgagaAC | OC(=O)CC1=CC=C(C1)C=C1              | 1878-66-6   |
| 440 | Cycle 3 | cgcttaggGA   | cctagaacgAC | OC(=O)C1COCC2=CC=CC=C2O1            | 3663-80-7   |
| 441 | Cycle 3 | aacccatggGA  | ccatgggttAC | OC(=O)CC1=C[NH]C2=C1C=CC=C2         | 87-51-4     |
| 442 | Cycle 3 | ctctgcttcGA  | gaagcagagAC | Cl.OC(=O)CC1=CC=NC=C1               | 6622-91-9   |
| 443 | Cycle 3 | caggctcatGA  | atgagcctgAC | OC(=O)CC1=C(C1)C=C(C1)C=C1          | 19719-28-9  |
| 444 | Cycle 3 | agaaccacgGA  | cggtgttctAC | CCC(C)C(O)=O                        | 116-53-0    |
| 445 | Cycle 3 | agctatcacGA  | gtgatagctAC | OC(=O)C1CCOCC1                      | 5337-03-1   |
| 446 | Cycle 3 | ttcacggctGA  | agccgtgaaAC | OC(=O)C=CC1=CC=C(C1)C=C1            | 1615-02-7   |
| 447 | Cycle 3 | gcttcacaaGA  | ttgtgaagcAC | OC(=O)C=CC1=CC=C(C=C1)C(F)(F)F      | 16642-92-5  |
| 448 | Cycle 3 | cgttatgCGA   | cgcataacgAC | OC(=O)CCC1=CC=C(O)C=C1              | 501-97-3    |
| 449 | Cycle 3 | ggtgattgcGA  | gcaatcaccAC | OC(=O)C1CC=CC1                      | 7686-77-3   |
| 450 | Cycle 3 | tcacctcaaGA  | ttgaggtgaAC | OC(=O)CC1=CC=C(O)C=C1               | 156-38-7    |
| 451 | Cycle 3 | accgattgaGA  | tcaatcggtAC | OC(=O)CC1=CC(=CC(=C1)F)F            | 105184-38-1 |
| 452 | Cycle 3 | cgtactggtGA  | accagtagcAC | OC(=O)CCCCCCC(O)=O                  | 505-48-6    |
| 453 | Cycle 3 | cataacgaGA   | tcgttagtAC  | OC(=O)CC(F)(F)F                     | 406-93-9    |
| 454 | Cycle 3 | actttacgGA   | gcgtaaagtAC | OC(=O)CCC1=CC=CS1                   | 5928-51-8   |
| 455 | Cycle 3 | gtgttctcgGA  | cgacaacacAC | OC(=O)CC1=C(F)C(=CC=C1)F            | 145689-41-4 |
| 456 | Cycle 3 | ctcacatggGA  | ccatgtgagAC | OC(=O)C1CCC=CC1                     | 4771-80-6   |
| 457 | Cycle 3 | ggcaactagGA  | ctagttgccAC | CCC1CCC(CC1)C(O)=O                  | 6833-47-2   |
| 458 | Cycle 3 | ctacagctcGA  | gagctgtagAC | CC(C)C1CCC(C)CC1OCC(O)=O            | 40248-63-3  |
| 459 | Cycle 3 | agcgcaataGA  | tattgcgctAC | OC(=O)CCCC1=CC=CS1                  | 4653-11-6   |
| 460 | Cycle 3 | gcatgtccaGA  | tggacatgcAC | CC(C(O)=O)C(O)=O                    | 516-05-2    |
| 461 | Cycle 3 | actgaagcaGA  | tgcttcagtAC | OC(=O)CCC1=CC=C(F)C=C1              | 459-31-4    |
| 462 | Cycle 3 | tcaggcagtGA  | actgcctgaAC | OC(=O)COC1CCCCC1                    | 71995-54-5  |
| 463 | Cycle 3 | ggcttactcGA  | gagtaagccAC | OC(=O)CCC(=O)C1=CC=C(Br)C=C1        | 6340-79-0   |
| 464 | Cycle 3 | agctagtcaGA  | tgactagtAC  | OC(=O)CC1=CC=C(C=C1)C#N             | 5462-71-5   |
| 465 | Cycle 3 | tactctctcGA  | agacagtaAC  | COCl=CC(=CC(=C1OC)OC)C=CC(O)=O      | 90-50-6     |
| 466 | Cycle 3 | cctctgaatGA  | attcaagagAC | OC(=O)COC1=CC(=CC=C1)Cl             | 588-32-9    |
| 467 | Cycle 3 | aatgttgcgGA  | cgcaacattAC | OC(=O)C1CC(=O)C1                    | 23761-23-1  |
| 468 | Cycle 3 | cagagattcGA  | gaatctctgAC | OC(=O)C1=NNC(=O)CC1                 | 27372-38-9  |
| 469 | Cycle 3 | tgttgctgcGA  | gcagcaacaAC | OC(=O)C=CC1=CC=C(O)C(=C1)O          | 331-39-5    |
| 470 | Cycle 3 | caagtgacGA   | gtcactgtgAC | OC(=O)C1CCC(=O)O1                   | 21461-84-7  |
| 471 | Cycle 3 | gaactgttaGA  | tacacgttcAC | OC(=O)CCCCC1CCSS1                   | 1077-28-7   |
| 472 | Cycle 3 | gatagactgGA  | cagtctatcAC | OC(=O)C1CCC(CC1)C(O)=O              | 619-82-9    |
| 473 | Cycle 3 | cttaagacgGA  | cgcttaagAC  | OC(=O)C1(C1)C2=CC=C(F)C=C2          | 773100-29-1 |
| 474 | Cycle 3 | cagtacacgGA  | cggttactgAC | OC(=O)C1(C1)C2=CC(=CC=C2)C1         | 124276-34-2 |
| 475 | Cycle 3 | ttgtgttgaGA  | tcaacaccaAC | OC(=O)CC1=CC=CC(=C1)O               | 621-37-4    |
| 476 | Cycle 3 | ctagacgcaGA  | ttcgcttagAC | OC(=O)C12CC3CC(CC(C3)C1)C2          | 828-51-3    |
| 477 | Cycle 3 | gaaagcgaGA   | ttcgcttccAC | OC(=O)CCC1=CC=C(Br)C=C1             | 1643-30-7   |
| 478 | Cycle 3 | cggtataaaGA  | ttatagccgAC | OC(=O)CCC1=NC=CC=C1                 | 15197-75-8  |
| 479 | Cycle 3 | cagacgtgtGA  | acacgtctgAC | OC(=O)C=CC1=CC(=CC=C1)[N+][([O-])=O | 555-68-0    |
| 480 | Cycle 3 | agatctcagGA  | ctgagatctAC | COCl=CC=C(C1)C=C1CC(O)=O            | 7569-62-2   |



|     |        |             |              |                                      |             |
|-----|--------|-------------|--------------|--------------------------------------|-------------|
| 481 | ycle 3 | gtgcaacatGA | atgttgacacAC | CC(C)(C)C1=CC=C(CC(O)=O)C=C1         | 32857-63-9  |
| 482 | ycle 3 | gccaacatGA  | atgtttggcAC  | OC(=O)C=CC1=CC(=CC=C1)C(F)(F)F       | 779-89-5    |
| 483 | ycle 3 | ccattctGA   | aggaaatgggAC | OC(=O)C12CC3CC(C1)CC(C3)(C2)C(O)=O   | 39269-10-8  |
| 484 | ycle 3 | gtcctacagGA | ctgtagacacAC | OC(=O)C1CC=CCC1C(O)=O                | 2305-26-2   |
| 485 | ycle 3 | cacatagccGA | ggctatgtgAC  | OC(=O)C1(CC1)C(O)=O                  | 598-10-7    |
| 486 | ycle 3 | ctaaggcctGA | agcccttagAC  | OC(=O)CCC1=C[NH]C2=CC=CC=C12         | 830-96-6    |
| 487 | ycle 3 | aggcgtagtGA | actacgcctAC  | OC(=O)CC1=CC=C(O)C(=C1)O             | 102-32-9    |
| 488 | ycle 3 | agtgaaggaGA | tccttcaactAC | CN(C)C1=CC=C(C=CC(O)=O)C=C1          | 1552-96-1   |
| 489 | ycle 3 | ctacgtctaGA | tagacgttagAC | OC(=O)CCC1=CC=CC=C1F                 | 1643-26-1   |
| 490 | ycle 3 | actcgtgctGA | agcacgagtAC  | OC(=O)C1CCCO1                        | 87392-07-2  |
| 491 | ycle 3 | gttgaagccGA | ggcttcaacAC  | COC1=CC=C(CC(O)=O)C=C1F              | 452-14-2    |
| 492 | ycle 3 | agaaggcgaGA | gccccttctAC  | CC(C)(C(O)=O)C(O)=O                  | 595-46-0    |
| 493 | ycle 3 | agacatcgaGA | cgatcgtctAC  | OC(=O)CC1=CC(=CC=C1)C(F)(F)F         | 351-35-9    |
| 494 | ycle 3 | gctcgatgaGA | gtatcgagcAC  | OC(=O)CCC1=CC=CC(=C1)[N+](=[O-])=O   | 1664-57-9   |
| 495 | ycle 3 | ccgattgtcGA | gacaatcggAC  | OC(C(O)=O)C1=CC=C(F)C=C1             | 395-33-5    |
| 496 | ycle 3 | caatccaggGA | cctggattgAC  | OC(=O)CC1=CC=C(I)C=C1                | 1798-06-7   |
| 497 | ycle 3 | aaccccgatGA | atcggggttAC  | OC(=O)CCC1=CC=CC(=C1)C1              | 21640-48-2  |
| 498 | ycle 3 | gattagcggGA | ccgtaatcAC   | OC(=O)C12CC3CC(CC(O)(C3)C1)C2        | 42711-75-1  |
| 499 | ycle 3 | ttccaaccGA  | ggttgaaaAC   | OC(=O)CC1=CC(=CC=C1Br)C1             | 81682-38-4  |
| 500 | ycle 3 | ggatgccatGA | atggcatccAC  | OC(=O)CCC1=CC=CC(=C1)C(F)(F)F        | 585-50-2    |
| 501 | ycle 3 | gatggctagGA | ctgaccatcAC  | Cl.NCC(=O)CCC(O)=O                   | 5451-09-2   |
| 502 | ycle 3 | tgccagtctGA | agactggcaAC  | OC(=O)C1CCC(F)(F)CC1                 | 122665-97-8 |
| 503 | ycle 3 | atagtggcgGA | cgccactatAC  | OC(=O)CC1=CC=C(Br)C=C1F              | 114897-92-6 |
| 504 | ycle 3 | tcagcatagGA | ctatgctgaAC  | OC(=O)CSC(C1=CC=CC=C1)C2=CC=CC=C2    | 63547-22-8  |
| 505 | ycle 3 | atgtgctggGA | ccagcacatAC  | OC(=O)CC1=CC=C2OCCC2=C1              | 69999-16-2  |
| 506 | ycle 3 | ccgatgatGA  | atcatgcccAC  | COC1=CC(=CC(=C1O)OC)C=CC(O)=O        | 530-59-6    |
| 507 | ycle 3 | aactcgagaGA | tctcgagtAC   | OC(=O)C1CCC(=O)CC1                   | 874-61-3    |
| 508 | ycle 3 | tggtcactGA  | aggtagccaAC  | CC(C)(C)OC(=O)CC(O)=O                | 40052-13-9  |
| 509 | ycle 3 | agctgactGA  | gagtcagctAC  | OC(=O)CC1=CC=C(F)C(=C1)Br            | 194019-11-9 |
| 510 | ycle 3 | tcgtacagcGA | gctgtacgaAC  | CC(C)(C)OC(=O)NC1CCC(CC1)C(O)=O      | 53292-89-0  |
| 511 | ycle 3 | atgttcttaGA | taagaaccgAC  | CC(C(O)=O)C1=CC=CC=C1                | 7782-26-5   |
| 512 | ycle 3 | cagccattGA  | aatggcgtgAC  | OC(=O)C=CC1=CC=C(O)C=C1              | 501-98-4    |
| 513 | ycle 3 | ttgtgcagaGA | tgctgacaaAC  | OC(=O)CC1=CC=C(F)C=C1Br              | 61150-59-2  |
| 514 | ycle 3 | cgccattgtGA | acaatggcgAC  | Cl.NC1=CC(=CC(=C1)O)C(O)=O           | 14206-69-0  |
| 515 | ycle 3 | caagtaacgGA | cgttactgtAC  | OC(=O)C1=CC=C(C1)S1                  | 24065-33-6  |
| 516 | ycle 3 | gcccattaaGA | ttaatcgccAC  | NC1=C(C=CC=N1)C(O)=O                 | 5345-47-1   |
| 517 | ycle 3 | cagaactgaGA | tcagttctgAC  | OC(=O)C1=CC=C(N=C1)C(F)(F)F          | 231291-22-8 |
| 518 | ycle 3 | gttatcagcGA | gctgataacAC  | OC(=O)CC1=CC=CS1                     | 1918-77-0   |
| 519 | ycle 3 | ctaaccggaGA | tcgcgttagAC  | OC(=O)C1=CC=CC=C1I                   | 88-67-5     |
| 520 | ycle 3 | gtctaaggGA  | cccttagacAC  | OC(=O)C1=CC=C(C=C1Cl)[N+](=[O-])=O   | 99-60-5     |
| 521 | ycle 3 | ttcagagcaGA | tgctctgaaAC  | NC1=CC=C(Br)C=C1C(O)=O               | 5794-88-7   |
| 522 | ycle 3 | tacggcgaaGA | ttcgccgtaAC  | COC1=CC(=CC=C1O)C(O)=O               | 121-34-6    |
| 523 | ycle 3 | ctagagatgGA | catcttagAC   | OC(=O)C1=CC(=CC=C1Cl)Br              | 21739-92-4  |
| 524 | ycle 3 | ctctgacaaGA | ttgtcagagAC  | OC(=O)C1=CC=CC(=C1)Br                | 585-76-2    |
| 525 | ycle 3 | agtaccgaaGA | ttcggtactAC  | CN(C)C1=CC(=CC=C1)C(O)=O             | 99-64-9     |
| 526 | ycle 3 | gtcgatgaaGA | ttcatgcacAC  | OC(=O)C1=CC=CC(=C1)O                 | 99-06-9     |
| 527 | ycle 3 | agcccaagtGA | acttgggctAC  | OC(=O)C1=CN=CC(=C1)Br                | 20826-04-4  |
| 528 | ycle 3 | gtactactGA  | agtgagtacAC  | COC1=CC=C(C=C1O)C(O)=O               | 645-08-9    |
| 529 | ycle 3 | ttagccttgGA | caagcctaaAC  | OC(=O)C1=CSC=C1                      | 88-13-1     |
| 530 | ycle 3 | actgcaaccGA | ggttgagctAC  | NC1=CC=C(C=C1N)C(O)=O                | 619-05-6    |
| 531 | ycle 3 | ctctgtcaGA  | tgaccagagAC  | OC(=O)C1=CN=C(C1)C=C1                | 5326-23-8   |
| 532 | ycle 3 | gtaagcaacGA | ggtgcttacAC  | OC(=O)C1=C(Cl)N=CC=C1                | 2942-59-8   |
| 533 | ycle 3 | catttcacgGA | cgtagaatgAC  | CC1=CC=C(S1)C(O)=O                   | 1918-79-2   |
| 534 | ycle 3 | gtactcagtGA | actgagtacAC  | NC1=CC(=CC=C1)C(O)=O                 | 99-05-8     |
| 535 | ycle 3 | ggcagcttaGA | taagctgccAC  | OC(=O)C1=CC=C(Br)C=C1[N+](=[O-])=O   | 99277-71-1  |
| 536 | ycle 3 | gctgtctacGA | gtagcaagcAC  | C[N]1N=C(C(O)=O)C2=C1C=CC=C2         | 50890-83-0  |
| 537 | ycle 3 | ccataccatGA | atggtaggAC   | OC(=O)C1=CC=C(C=C1O)C(F)(F)F         | 328-90-5    |
| 538 | ycle 3 | cgttatctGA  | aggataacgAC  | COC1=CC=C(C(=C1)C(O)=O)[N+](=[O-])=O | 1882-69-5   |
| 539 | ycle 3 | gataactacGA | gtaggtatcAC  | COC1=CC(=CC=C1)C(O)=O                | 586-38-9    |
| 540 | ycle 3 | aacaaggggGA | cccctgttAC   | OC(=O)C1=CC=CC=C1C(F)(F)F            | 433-97-6    |

|     |         |             |             |                                                  |             |
|-----|---------|-------------|-------------|--------------------------------------------------|-------------|
| 540 | Cycle 3 | aacaaggggGA | ccccttgttAC | OC(=O)C1=CC=CC=C1C(F)(F)F                        | 433-97-6    |
| 541 | Cycle 3 | tgaacctacGA | gtaggttcaAC | OC(=O)C1=CC=CC(=C1)C(F)(F)F                      | 454-92-2    |
| 542 | Cycle 3 | agtgcgatcGA | agatgcactAC | CC1=C(C=CC=C1C(O)=O)[N+][([O-])=O                | 1975-50-4   |
| 543 | Cycle 3 | acggcgataGA | tatccocgtAC | OC(=O)C1=NC2=CC=CC=C2N=C1                        | 879-65-2    |
| 544 | Cycle 3 | tttgacgtcGA | gacgtcaaaAC | OC(=O)C1=N[NH]C=C1[N+][([O-])=O                  | 5334-40-7   |
| 545 | Cycle 3 | gaagagcagGA | ctgctctcAC  | OC(=O)C1=N[NH]C=C1Br                             | 13745-17-0  |
| 546 | Cycle 3 | gttcacactGA | agtgtgaacAC | CCC1=CC=C(C=C1)C(O)=O                            | 619-64-7    |
| 547 | Cycle 3 | tagtcggaaGA | ttocgactaAC | CC1=CC=C(C(=C1)C)C(O)=O                          | 611-01-8    |
| 548 | Cycle 3 | tacgagtaGA  | tacctcgtaAC | OC(=O)C1=C(Cl)C=CC=C1Cl                          | 50-30-6     |
| 549 | Cycle 3 | ctgtgtaacGA | gttacacagAC | OC(=O)C1=CN=C(Cl)C(=C1)Br                        | 29241-62-1  |
| 550 | Cycle 3 | gaaaaccgGA  | gcggttttcAC | OC(=O)C1=C(Cl)N=CC(=C1)Br                        | 29241-65-4  |
| 551 | Cycle 3 | ttgagaaggGA | ccttctcaaAC | COC1=C(C=C(N)C(=C1)C(O)=O)[N+][([O-])=O          | 196194-99-7 |
| 552 | Cycle 3 | gataaccgGA  | cgctttatcAC | CC1=CC=C(Cl)C=C1C(O)=O                           | 7499-06-1   |
| 553 | Cycle 3 | tagattcgcGA | gcgaatctaAC | OC(=O)C1=CC=C(C(=C1)[N+][([O-])=O])[N+][([O-])=O | 528-45-0    |
| 554 | Cycle 3 | ttgtgcgcGA  | ggcgacaaaAC | OC(=O)C1=C(C=CC=C1F)[N+][([O-])=O                | 385-02-4    |
| 555 | Cycle 3 | ctgtcgtcGA  | agacgacagAC | CC1=CC=C(C=C1)C(O)=O                             | 82998-57-0  |
| 556 | Cycle 3 | acaagtgtGA  | acgactgtAC  | OC(=O)C1=CC=C(S1)C2=CC=CC=C2                     | 19163-24-7  |
| 557 | Cycle 3 | tacattgcGA  | gcgaatgtaAC | CN1CCN(CC1)C2=CC(=CC=C2)C(O)=O                   | 215309-01-6 |
| 558 | Cycle 3 | cgagctattGA | aatagctcgAC | NC1=CN=C(C=N1)C(O)=O                             | 40155-43-9  |
| 559 | Cycle 3 | cttaggggtGA | caccctaagAC | OC(=O)C1=NC=CC(=C1)Br                            | 30766-03-1  |
| 560 | Cycle 3 | tacgcctcaGA | tgaggcgtaAC | OC(=O)C1=CN=C(Br)C=C1                            | 6311-35-9   |
| 561 | Cycle 3 | ctaattgctGA | acgcattagAC | NC1=CC(=CC=C1O)C(O)=O                            | 1571-72-8   |
| 562 | Cycle 3 | tatccatcgGA | cgatggataAC | NC1=CC=C(O)C(=C1)C(O)=O                          | 89-57-6     |
| 563 | Cycle 3 | tcaagctcGA  | gagctttgaAC | COC(=O)C1=CC=CC(=C1)C(O)=O                       | 1877-71-0   |
| 564 | Cycle 3 | tgctcatcgGA | cgatgacacAC | OC(=O)C1=CC=CC(=C1Cl)[N+][([O-])=O               | 3970-35-2   |
| 565 | Cycle 3 | aagtctctGA  | caggaaactAC | OC(=O)C1=CC=CC(=C1F)Br                           | 161957-56-8 |
| 566 | Cycle 3 | acaattgccGA | ggcaattgtAC | OC(=O)C1=CC=CN=C1C(O)=O                          | 89-00-9     |
| 567 | Cycle 3 | cggtctctaGA | tagagaccgAC | OC(=O)C1=CC=CC=C1N2CCOCC2                        | 42106-48-9  |
| 568 | Cycle 3 | catgagcacGA | gtgctcatgAC | OC(=O)C1=CC=CC=C1[N]2C=CC=N2                     | 55317-53-8  |
| 569 | Cycle 3 | tccacaagGA  | cgttgtggaAC | OC(=O)C1=CC=C(C=C1)N2CCOCC2                      | 7470-38-4   |
| 570 | Cycle 3 | acttgctcgGA | cgaccaagtAC | OC(=O)C1=CC=CC(=C1)N2CCCC2                       | 72548-79-9  |
| 571 | Cycle 3 | tctatcgccGA | ggcgatagaAC | OC(=O)C1=CC=CC=C1N2CCCC2                         | 78648-27-8  |
| 572 | Cycle 3 | ggcaagagtGA | actctgccAC  | CC1=CC=C(C=C1O)C(O)=O                            | 586-30-1    |
| 573 | Cycle 3 | ctgcaagcaGA | tgcttgagAC  | OC1=CC(=CN=C1)C(O)=O                             | 27828-71-3  |
| 574 | Cycle 3 | tcagccatGA  | atggcatgaAC | OC(=O)C1=CC(=CN=C1)C(O)=O                        | 499-81-0    |
| 575 | Cycle 3 | tatgcgatgGA | catgcgataAC | OC(=O)C1=CC=CC(=C1Br)F                           | 132715-69-6 |
| 576 | Cycle 3 | tgacaacgcGA | gcgtgtcaAC  | CCOC1=CC=CC=C1C(O)=O                             | 134-11-2    |
| 577 | Cycle 3 | gatcaacctGA | aggctgatcAC | C[N]1C=C(C(O)=O)C2=C1C=CC=C2                     | 32387-21-6  |
| 578 | Cycle 3 | ctactgctcGA | gagcagtagAC | COC1=C(OC)C(=CC(=C1)C(O)=O)OC                    | 118-41-2    |
| 579 | Cycle 3 | gtctacagGA  | cggttagcaAC | CC1=CN=C(C=N1)C(O)=O                             | 5521-55-1   |
| 580 | Cycle 3 | ggttggactGA | agtccaaccAC | OC(=O)C1=N[NH]C2=C1C=CC=C2                       | 4498-67-3   |
| 581 | Cycle 3 | ggocctattGA | aatagggccAC | NC1=CC=CC(=C1C(O)=O)[N+][([O-])=O                | 50573-74-5  |
| 582 | Cycle 3 | cgcgattacGA | gtaatcgccAC | OC(=O)C1=C(N=CC=C1)N2CCOCC2                      | 423768-54-1 |
| 583 | Cycle 3 | agggtccatGA | atggacctAC  | OC(=O)C1=NC=CC(=C1)Cl                            | 5470-22-4   |
| 584 | Cycle 3 | ccatttcgGA  | ccgaaatggAC | OC(=O)C1=CC(=NC=C1)Cl                            | 6313-54-8   |
| 585 | Cycle 3 | agtatggccGA | ggccactacAC | CC1(C)OB(OC1(C)C)C2=CC=CC(=C2)C(O)=O             | 269409-73-6 |
| 586 | Cycle 3 | tacaacgtGA  | accgttgaAC  | OB(O)C1=CC=CC(=C1)C(O)=O                         | 25487-66-5  |
| 587 | Cycle 3 | acctctcGA   | aggagaggtAC | OC(=O)C1=C(F)C=CC=C1F                            | 385-00-2    |
| 588 | Cycle 3 | ttcacaccGA  | ggtcgtgaaAC | OC(=O)C1=C(O)C=CC(=C1)C=O                        | 616-76-2    |
| 589 | Cycle 3 | caactaaggGA | ccttagttgAC | CC1=C(C=NO1)C(O)=O                               | 42831-50-5  |
| 590 | Cycle 3 | gtaaccactGA | agtgttacAC  | CC1=C(C=CC(=C1)N)C(O)=O                          | 2486-75-1   |
| 591 | Cycle 3 | gcgagtataGA | tatactcgcAC | NC1=CN=CC=C1C(O)=O                               | 7579-20-6   |
| 592 | Cycle 3 | gatcgagacGA | gtctcgatcAC | CSC1=NC=C(Br)C(=N1)C(O)=O                        | 50593-92-5  |
| 593 | Cycle 3 | cagctcctaGA | taggagctgAC | OC(=O)C1=CC=C(C(=C1)F)[N+][([O-])=O              | 403-21-4    |
| 594 | Cycle 3 | aagagcgaGA  | tcggctcttAC | NC1=CC=C(C=C1[N+][([O-])=O])C(O)=O               | 1588-83-6   |
| 595 | Cycle 3 | caagtggcaGA | tgccacttgAC | CC1=CC=C(C=C1Cl)C(O)=O                           | 5162-82-3   |
| 596 | Cycle 3 | catgtttgcGA | gcaacaatgAC | OC(=O)C1=CC(=CC(=C1)O)O                          | 99-10-5     |
| 597 | Cycle 3 | accatacgaGA | cgatgggtAC  | OC(=O)C1=NC=C(Br)C=N1                            | 37131-87-6  |
| 598 | Cycle 3 | ttgcaggtGA  | caactgcaaAC | OC(=O)C1=CC=CC(=C1O)O                            | 303-38-8    |
| 599 | Cycle 3 | gtctcttagGA | ctaaggacaAC | COC1=CC=C(O)C(=C1)C(O)=O                         | 2612-02-4   |
| 600 | Cycle 3 | atacacgcGA  | cgctgtatAC  | OC(=O)C1=CC=NC(=C1)N2CCOCC2                      | 295349-64-3 |
| 601 | Cycle 3 | tgccataaGA  | ttatggccaAC | OC(=O)C1=NC=C(C=C1)[N+][([O-])=O                 | 30651-24-2  |
| 602 | Cycle 3 | ttcagccatGA | atggctgaaAC | OC(=O)C1=CC=C(C(Br)C=C1                          | 6232-88-8   |
| 603 | Cycle 3 | caagactacGA | gtagtcttgAC | CC1=CC=C(C=C1[N+][([O-])=O])C(O)=O               | 96-98-0     |
| 604 | Cycle 3 | agtctgtgGA  | accacactAC  | OC(=O)C1=CC=C2OC=CC2=C1                          | 90721-27-0  |
| 605 | Cycle 3 | ctattgaccGA | ggtcaatagAC | CC1=CC(=C(C)C=C1)C(O)=O                          | 610-72-0    |
| 606 | Cycle 3 | ctgactgacGA | gtcagtcagAC | OCC1=CC=C(C=C1)C(O)=O                            | 3006-96-0   |
| 607 | Cycle 3 | aggtttcacGA | gtgaaactAC  | CC1=CC=C(C=C1)C(O)=O                             | 99-94-5     |
| 608 | Cycle 3 | gaaagcagtGA | actgcttcAC  | C[N]1C=NC(=C1)C(O)=O                             | 41716-18-1  |
| 609 | Cycle 3 | actggctgaGA | tagccagatAC | OC(=O)C1=C(C=CC=C1)C2=CC=CC=C2                   | 947-84-2    |
| 610 | Cycle 3 | atgttccacGA | gtggaaactAC | c                                                | c           |



## 11. Affinity selection

HisPur™ Ni-NTA Magnetic Beads (20 µl, Thermo Scientific 88832) were washed three times with washing buffer (200 µl; 50 mM PBS [pH 7.4], 0.1% Tween-20, 10 mM imidazole). The protein was added to the magnetic beads, and incubated in 100 µl of selection buffer (50 mM PBS [pH 7.4], 0.1% Tween-20, 10 mM imidazole, 0.1 mg/mL sheared salmon sperm DNA) for 30 min with continuous gentle mixing at room temperature. The beads were washed once with 200 µl selection buffer and subsequently transferred to a solution of DEL (5 nmol) in 100 µl selection buffer. The beads were incubated for 1h with continuous gentle mixing at room temperature. The beads were washed three times with selection buffer (200 µl), incubated in a dry-bath at 95°C for 10 minutes in 100 µl of selection buffer. The elutes (90 µl) were transferred to the protein-loaded beads. The beads were incubated in 100 µl of selection buffer for 1h with continuous gentle mixing at room temperature. The beads were washed three times with selection buffer (200 µl), incubated in a dry-bath at 95°C for 10 minutes in 100 µl of selection buffer. The elutes (90 µl) were transferred to the protein-loaded beads. Beads were incubated in 100 µl of selection buffer for 1h with continuous gentle mixing at room temperature. The beads were washed three times with selection buffer (200 µl). 100 µl of ddH<sub>2</sub>O was added and incubated in a dry-bath at 95°C for 10 minutes. The elutes were used to run qPCR and amplified by PCR. After submitted to GENEWIZ, Inc for Next-generation sequencing on Illumina.

## 12. Enrichment Calculation

$$\text{For 3-cycle DELs: Enrichment} = \frac{\frac{c}{N}}{\frac{X}{S}}$$

Enrichment: normalization processing of copy number

C: copy number of the molecule

N: total reads

S: library size

X: real number of the molecule

## 13. Radioactive acetyltransferase activity assay - by Shanghai Chem-

## **Partner Co., Ltd**

### **Materials**

p300: BPS, Cat. No. 50071

[3H]-Ac-CoA: PerkinElmer, Cat. No. NET290

Ac-CoA: Sigma, Cat. No. A2056

C646: Calbiochem, Cat. No. 382113

384-well Flashplate: Perkin Elmer, Cat. No. SMP410A001PK

Compounds: in 10 mM DMSO stock

### **Procedure**

1. Prepare 1x buffer  
Prepare 1x assay buffer (modified Tris Buffer).
2. Compound serial dilution:  
Transfer compounds to assay plate by Echo in 100% DMSO. The final fraction of DMSO is 1%.
3. Prepare enzyme solution:  
Prepare enzyme solution in 1x assay buffer.
4. Prepare substrate solution:  
Add peptide and [3H]-Ac-CoA in 1x assay buffer to make the substrate solution.
5. Transfer 10  $\mu$ L of enzyme solution to assay plate or for low control transfer 10  $\mu$ L of 1x assay buffer. Incubate at room temperature for 15 min.
6. Add 10  $\mu$ L of substrate solution to each well to start reaction. Incubate at room temperature for 60 min.
7. Prepare stop solution:  
Add cold Ac-CoA in 1x assay buffer to make the stop mix.
8. Stop reaction with addition of 10  $\mu$ L per well of stop solution.
9. Transfer 25  $\mu$ L of volume per well to Flashplate from assay plate. Incubate for 1 hr minimum at room temperature.
10. Wash Flashplate with ddH<sub>2</sub>O + 0.1% Tween-20 three times.
11. Read plate on Microbeta.

## 12. Data process

Fit the data in Excel to obtain inhibition values using equation (1)

$$\text{Equation (1): inh \%} = (\text{Max-Signal}) / (\text{Max-Min}) * 100$$

Fit the data in XL-Fit to obtain IC50 values using equation (2)

$$\text{Equation (2): } Y = \text{Bottom} + (\text{Top-Bottom}) / (1 + (\text{IC}_{50}/X)^{\text{HillSlope}})$$

Y is %inhibition and X is compound concentration.

## 14. Supplementary notes

### List of abbreviations.

|                         |                                                                                                         |
|-------------------------|---------------------------------------------------------------------------------------------------------|
| <b>AcOH</b>             | <b>Acetic acid</b>                                                                                      |
| <b>brine</b>            | <b>Saturated NaCl (aqueous)</b>                                                                         |
| <b>Boc</b>              | <b>t-butoxycarbonyl</b>                                                                                 |
| <b>Cbz</b>              | <b>benzyloxycarbonyl</b>                                                                                |
| <b>DCM</b>              | <b>Dichloromethane</b>                                                                                  |
| <b>DCE</b>              | <b>1,2-Dichloroethane</b>                                                                               |
| <b>ddH<sub>2</sub>O</b> | <b>double-distilled water</b>                                                                           |
| <b>DIC</b>              | <b>N, N'-Diisopropylcarbodiimide</b>                                                                    |
| <b>DIPEA</b>            | <b>N, N-Diisopropylethylamine</b>                                                                       |
| <b>DMF</b>              | <b>N, N-Dimethylformamide</b>                                                                           |
| <b><i>t</i>BuOH</b>     | <b>2-methyl-2-propano</b>                                                                               |
| <b><i>t</i>-AmylOH</b>  | <b>2-Methyl-2-butanol</b>                                                                               |
| <b>Fmoc-Cl</b>          | <b>Fluorenylmethoxycarbonyl-Cl</b>                                                                      |
| <b>HATU</b>             | <b><i>O</i>-(6-Chlorobenzotriazol-1-yl)-N, N, N',<br/>N'-tetramethyluronium<br/>hexafluorophosphate</b> |
| <b>HOAt</b>             | <b>1-Hydroxy-7-azabenzotriazole</b>                                                                     |
| <b>HPLC</b>             | <b>High-performance liquid chromatog-<br/>raphy</b>                                                     |
| <b>HRMS</b>             | <b>High-resolution mass spectrometry</b>                                                                |
| <b>LRMS</b>             | <b>Low-resolution mass spectrometry</b>                                                                 |

|              |                                                          |
|--------------|----------------------------------------------------------|
| <b>NMP</b>   | <b>N-Methyl-2-pyrrolidone</b>                            |
| <b>NMR</b>   | <b>Nuclear magnetic resonance</b>                        |
| <b>Oxyma</b> | <b>Ethyl (hydroxyimino)cynoacetate</b>                   |
| <b>Pbf</b>   | <b>2,2,4,6,7-pentamethyldihydrobenzofuran-5-sulfonyl</b> |
| <b>SPPS</b>  | <b>Solid-phase peptide synthesis</b>                     |
| <b>TFA</b>   | <b>Trifluoroacetic acid</b>                              |
| <b>TFE</b>   | <b>Trifluoroethanol</b>                                  |

## 15. Reference

Bo Li, Xinghua Li, Boyang Han, Zhijie Chen, Xuekai Zhang, Gang He, and Gong Chen. Construction of Natural-Product-Like Cyclophane-Braced Peptide Macrocycles via  $sp^3$  C–H Arylation. *J. Am. Chem. Soc.* **2019**, 141, 23, 9401–9407.

## 16. NMR spectrum

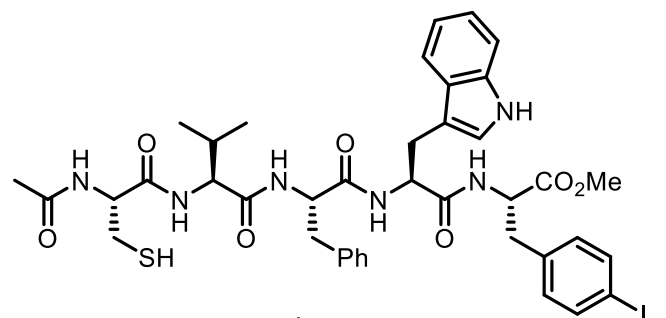

**1**

<sup>1</sup>H NMR of compound **1** (400 MHz, 5%MeOD in DMSO)

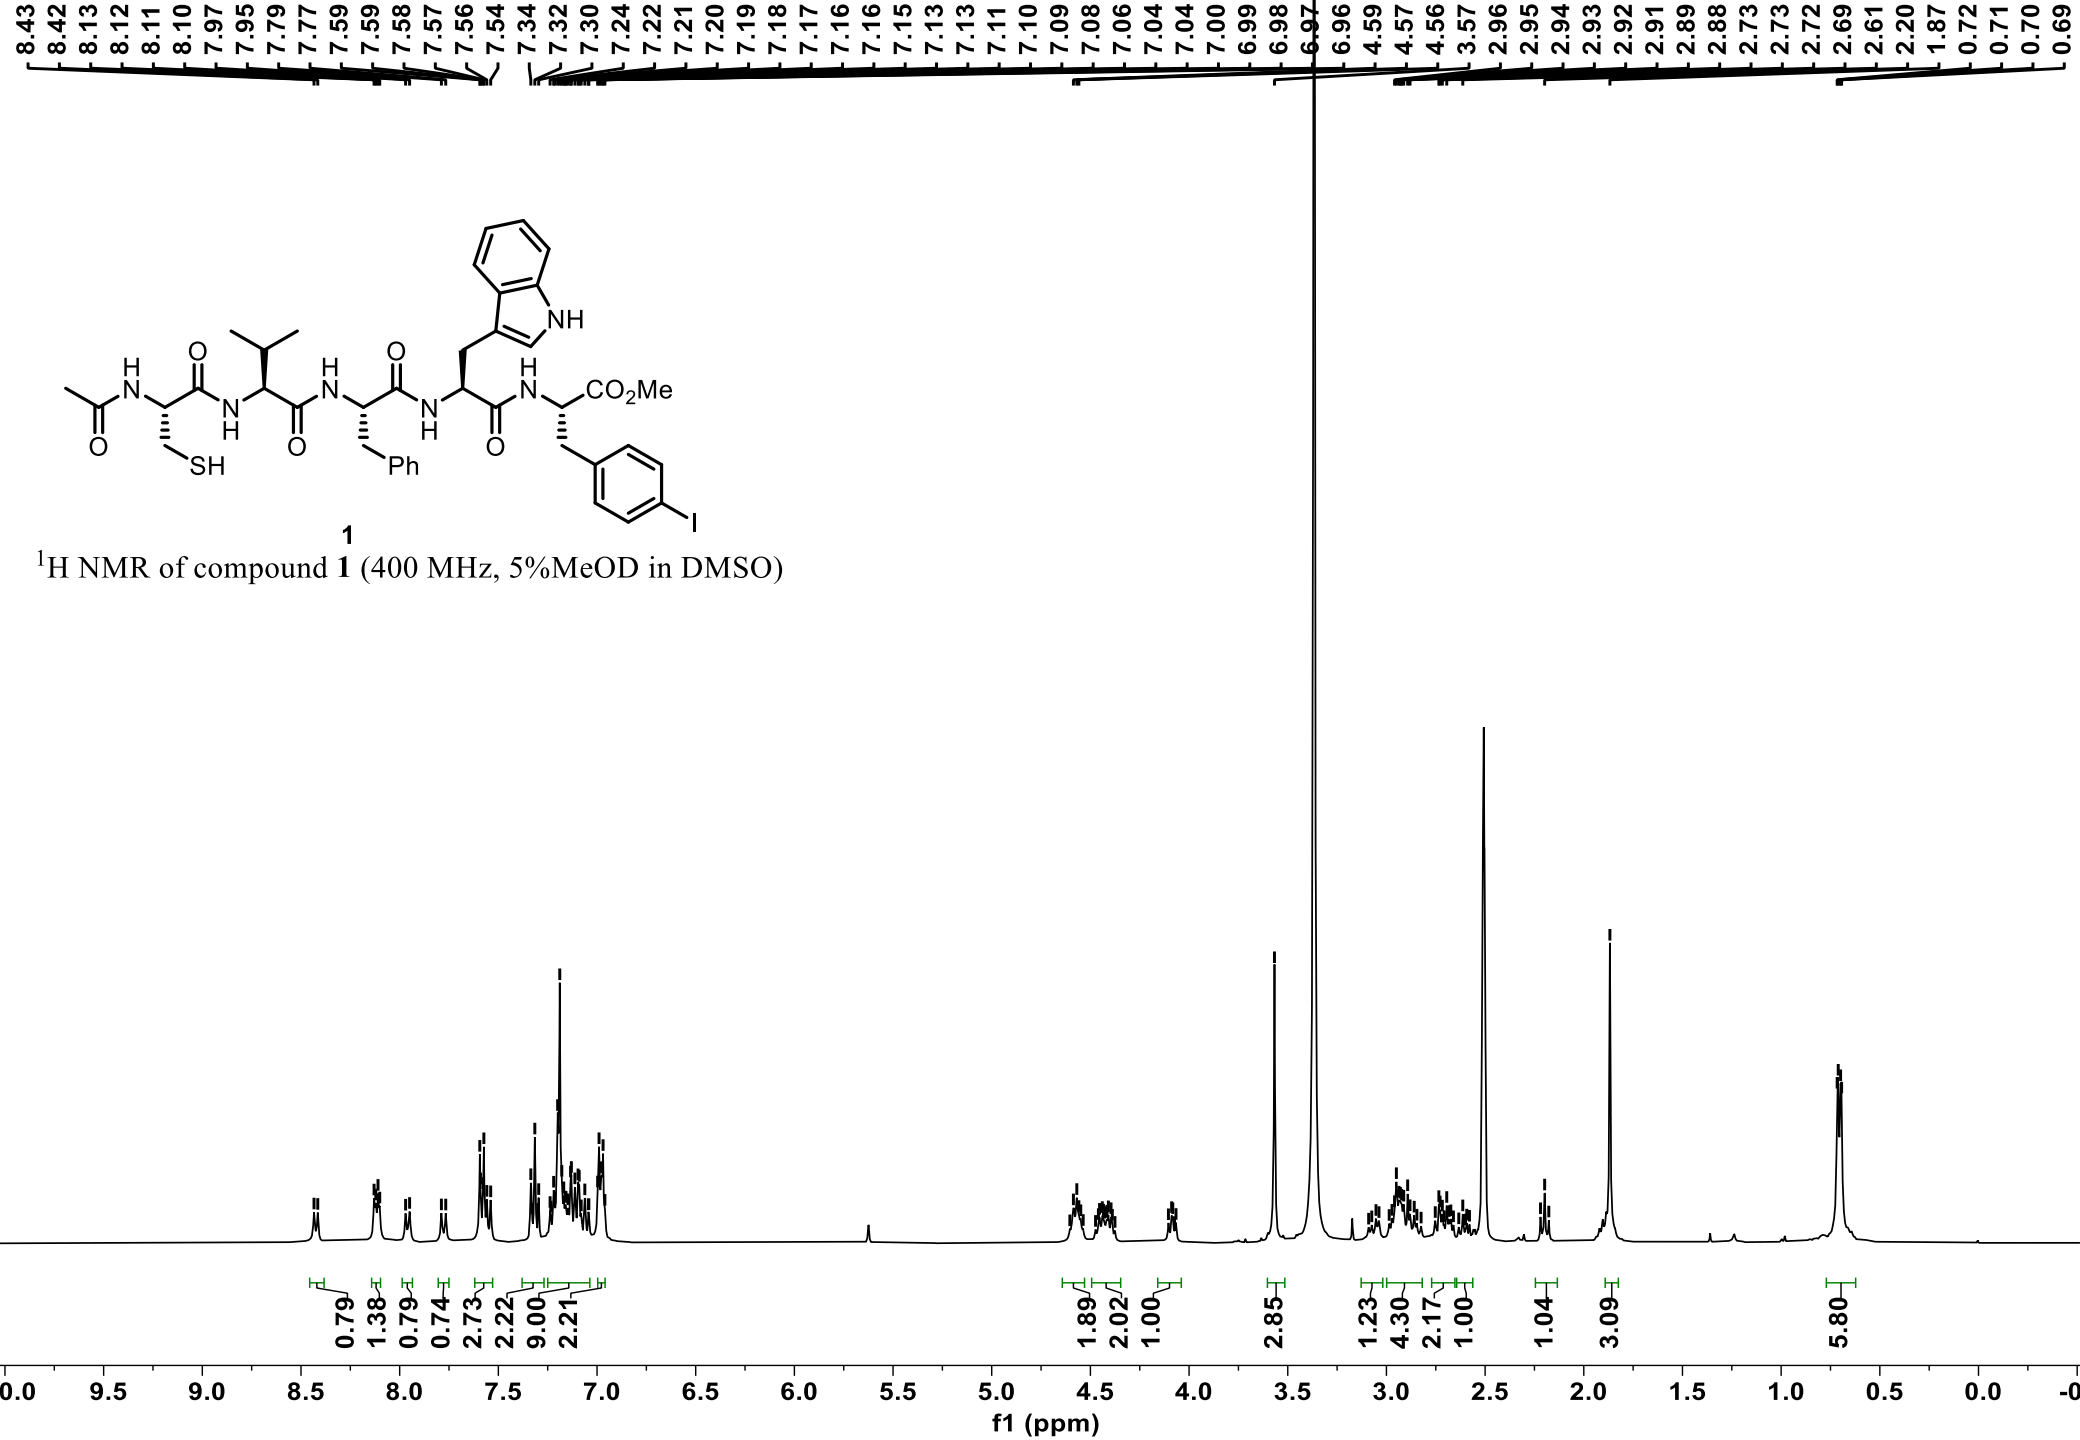

8.17  
7.43  
7.41  
7.34  
7.32  
7.31  
7.29  
7.19  
7.18  
7.17  
7.17  
7.12  
7.10  
7.08  
7.06  
7.04  
6.96  
6.95  
6.94  
6.79  
6.78  
6.61  
6.59  
6.57  
6.55  
4.78  
4.57  
4.56  
4.55  
4.21  
4.19  
3.98  
3.77  
3.48  
3.47  
3.45  
3.44  
3.35  
3.33  
3.32  
3.28  
3.25  
3.24  
3.15  
3.13  
3.12  
3.10  
2.96  
2.93  
2.92  
2.86  
2.84  
2.83  
2.34  
2.32  
2.20  
2.18  
2.16  
2.09  
0.85  
0.83  
0.73  
0.71

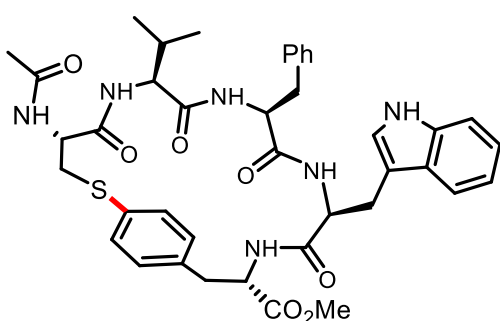

**2**

<sup>1</sup>H NMR of compound **2** (400 MHz, Chloroform-*d*)

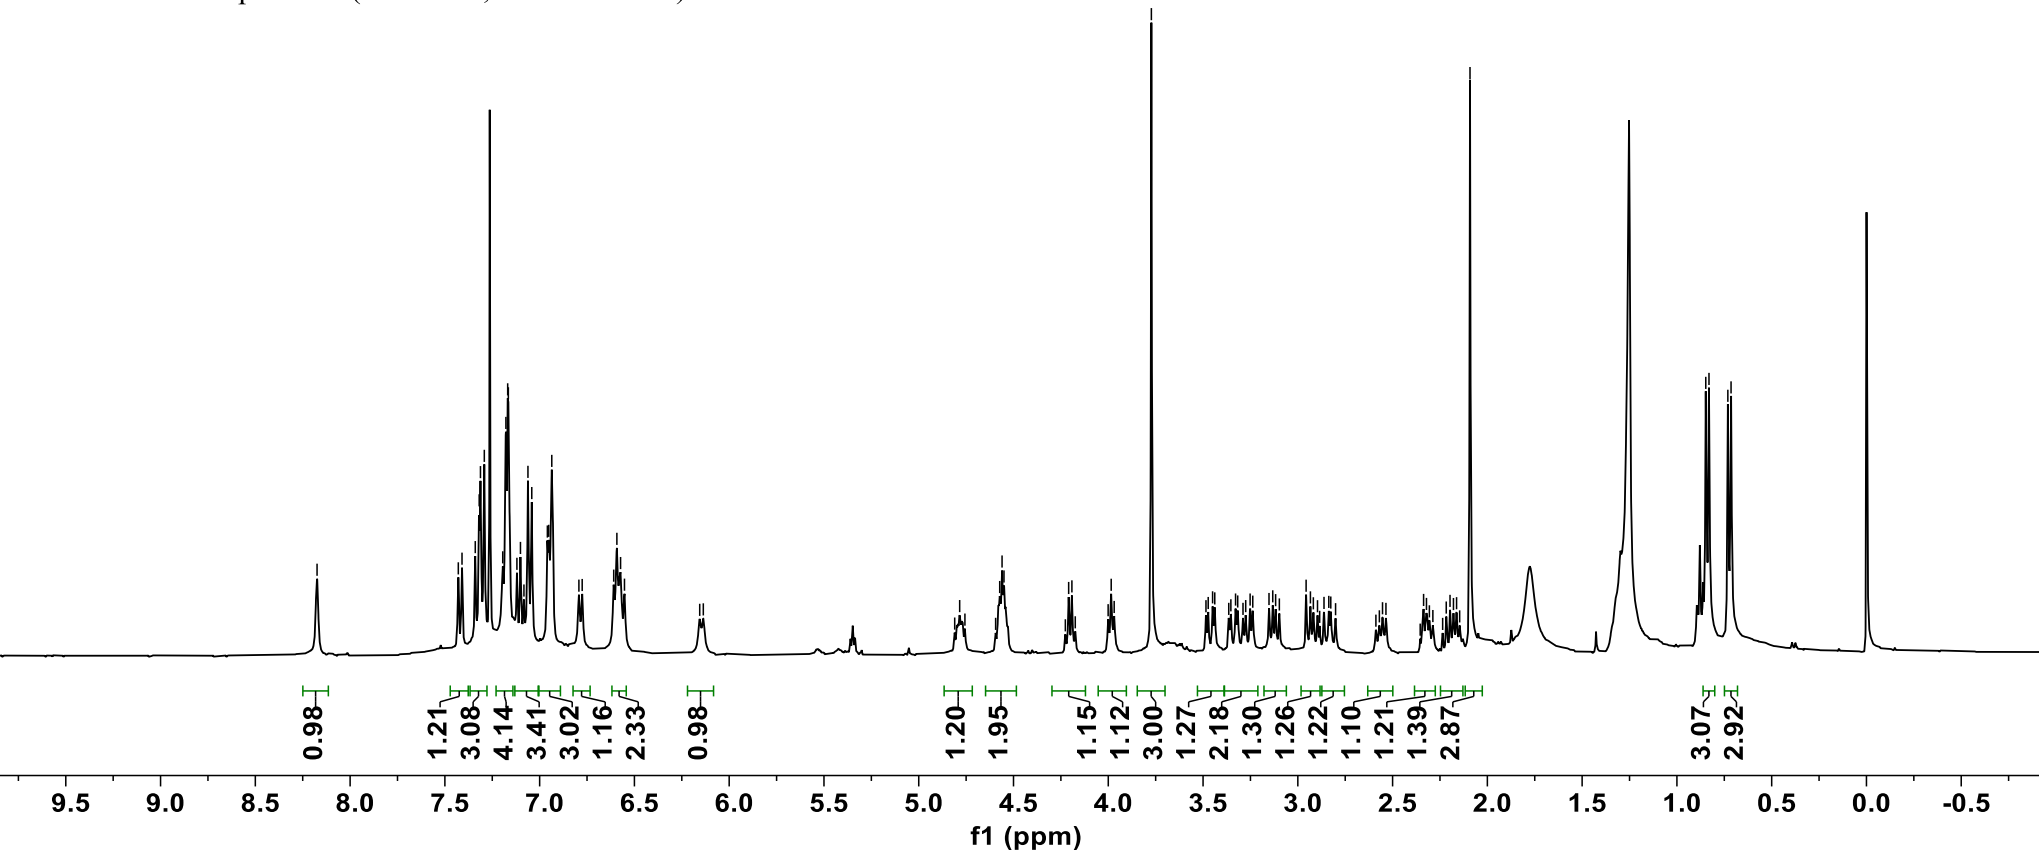

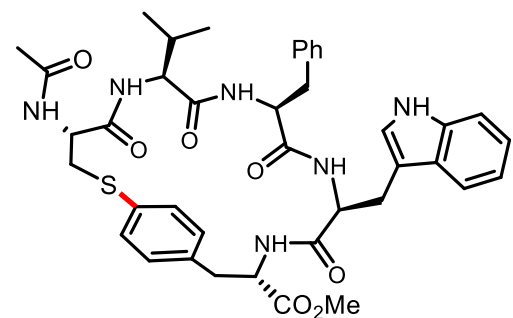

**2**

$^{13}\text{C}$  NMR of compound **2** (101 MHz,  $\text{DMSO-}d_6$ )

174.27  
172.15  
171.50  
170.33  
170.15  
169.49  
137.62  
136.04  
135.23  
133.68  
130.12  
129.89  
129.61  
129.17  
127.87  
127.14  
126.11  
123.45  
120.92  
118.39  
118.18  
111.30  
109.84

58.77  
53.53  
53.06  
52.37  
52.17  
52.07

31.24  
29.65  
26.52  
25.07  
22.29  
22.05  
18.94  
17.50  
13.90

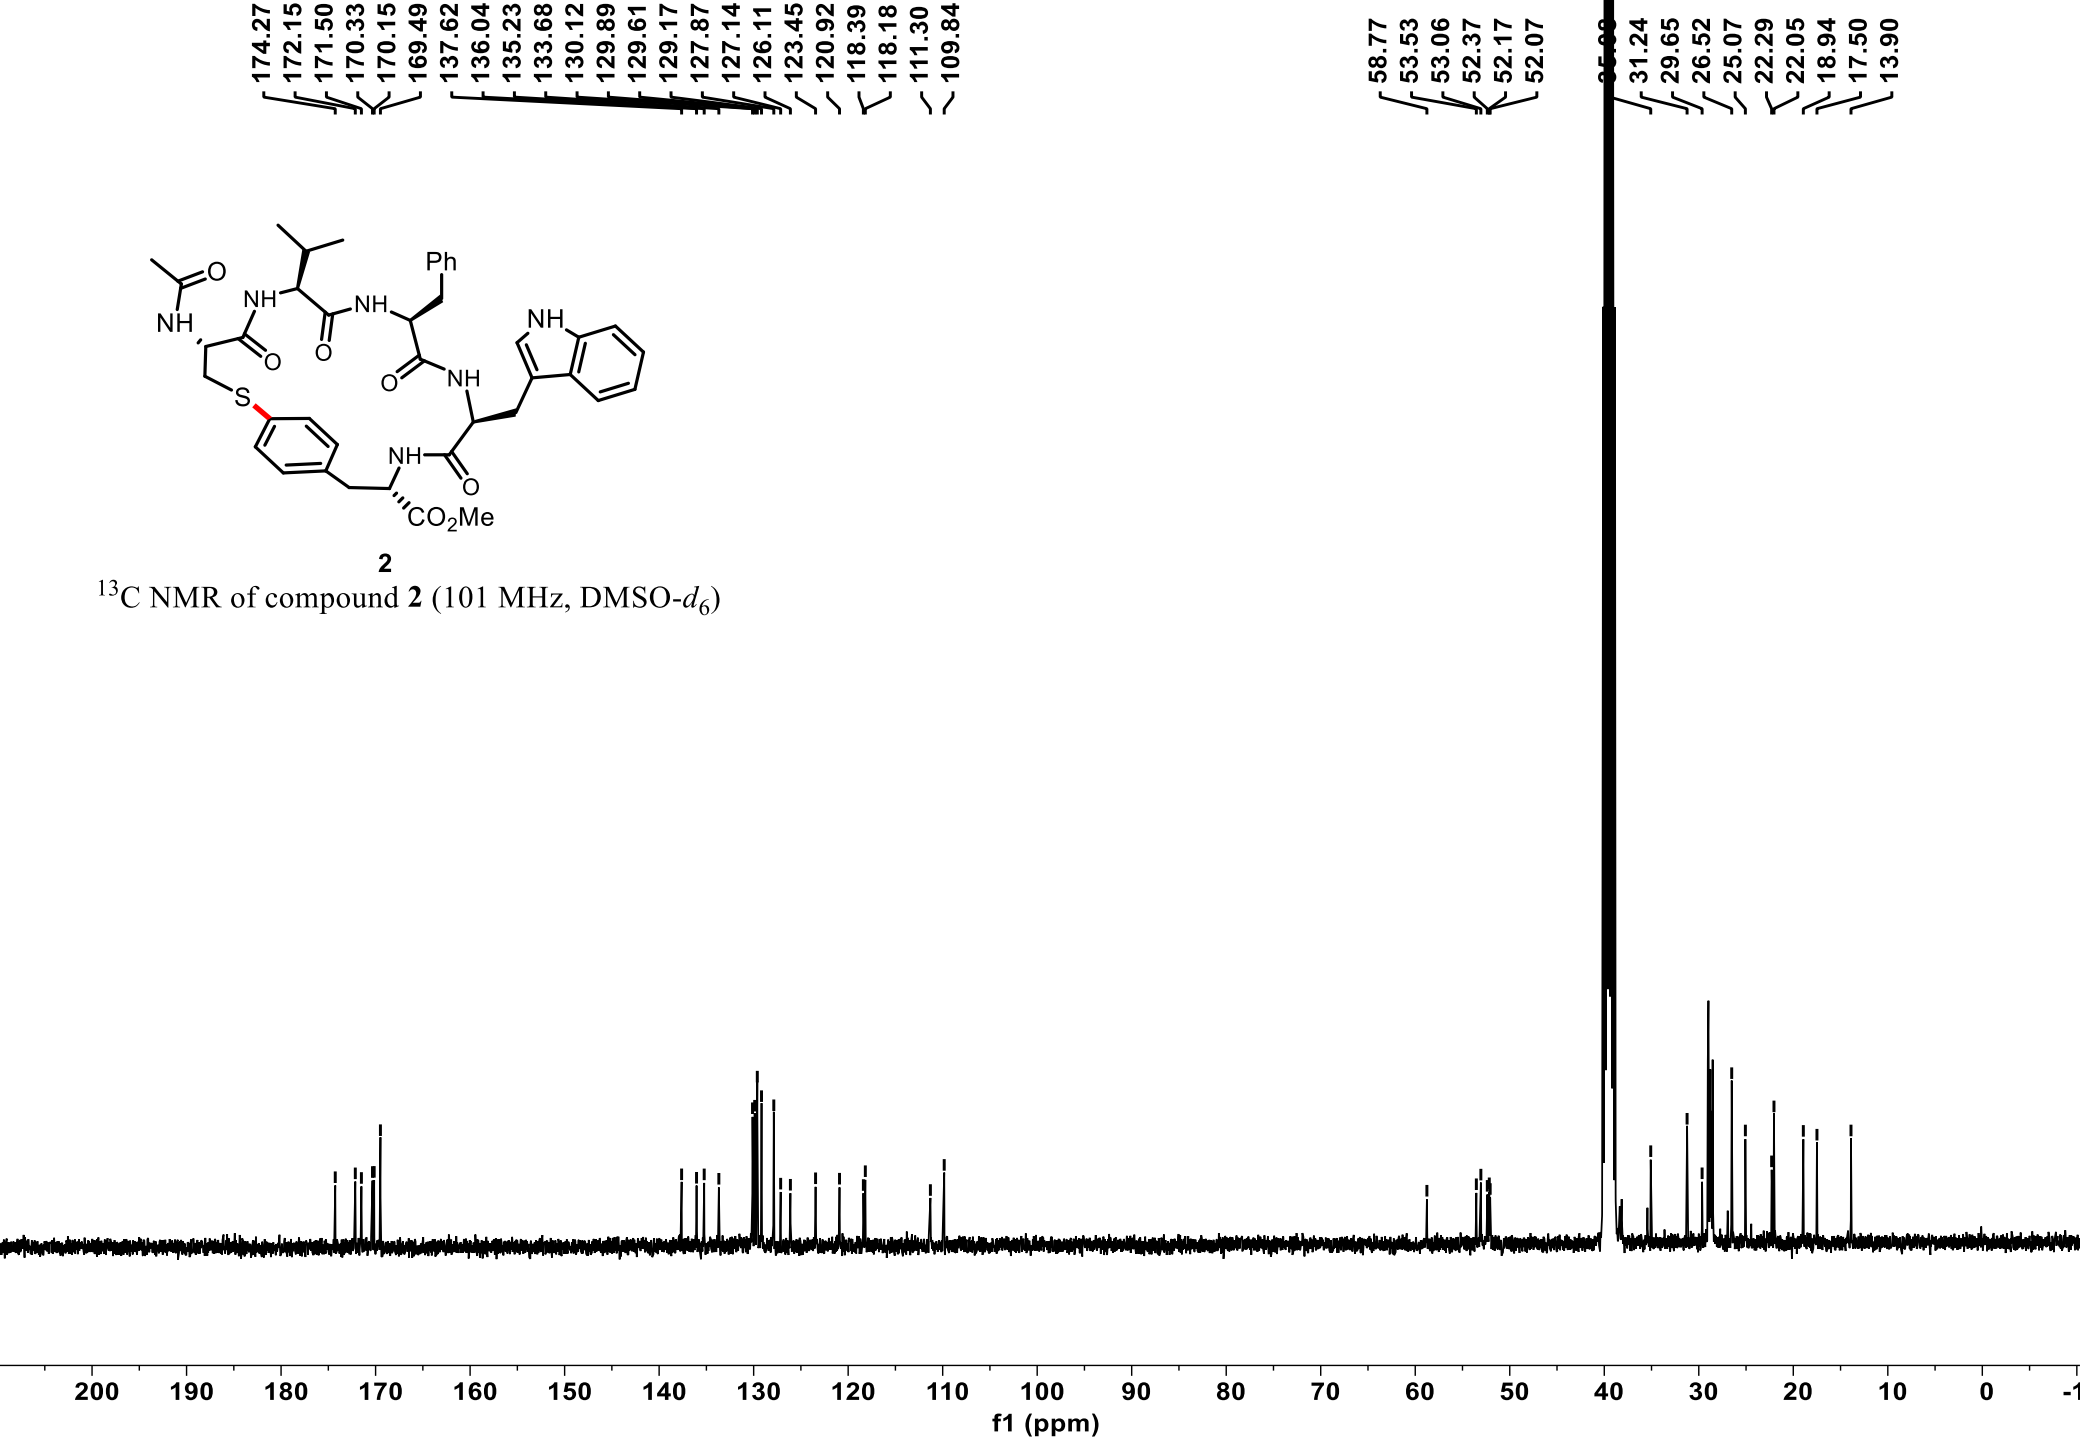

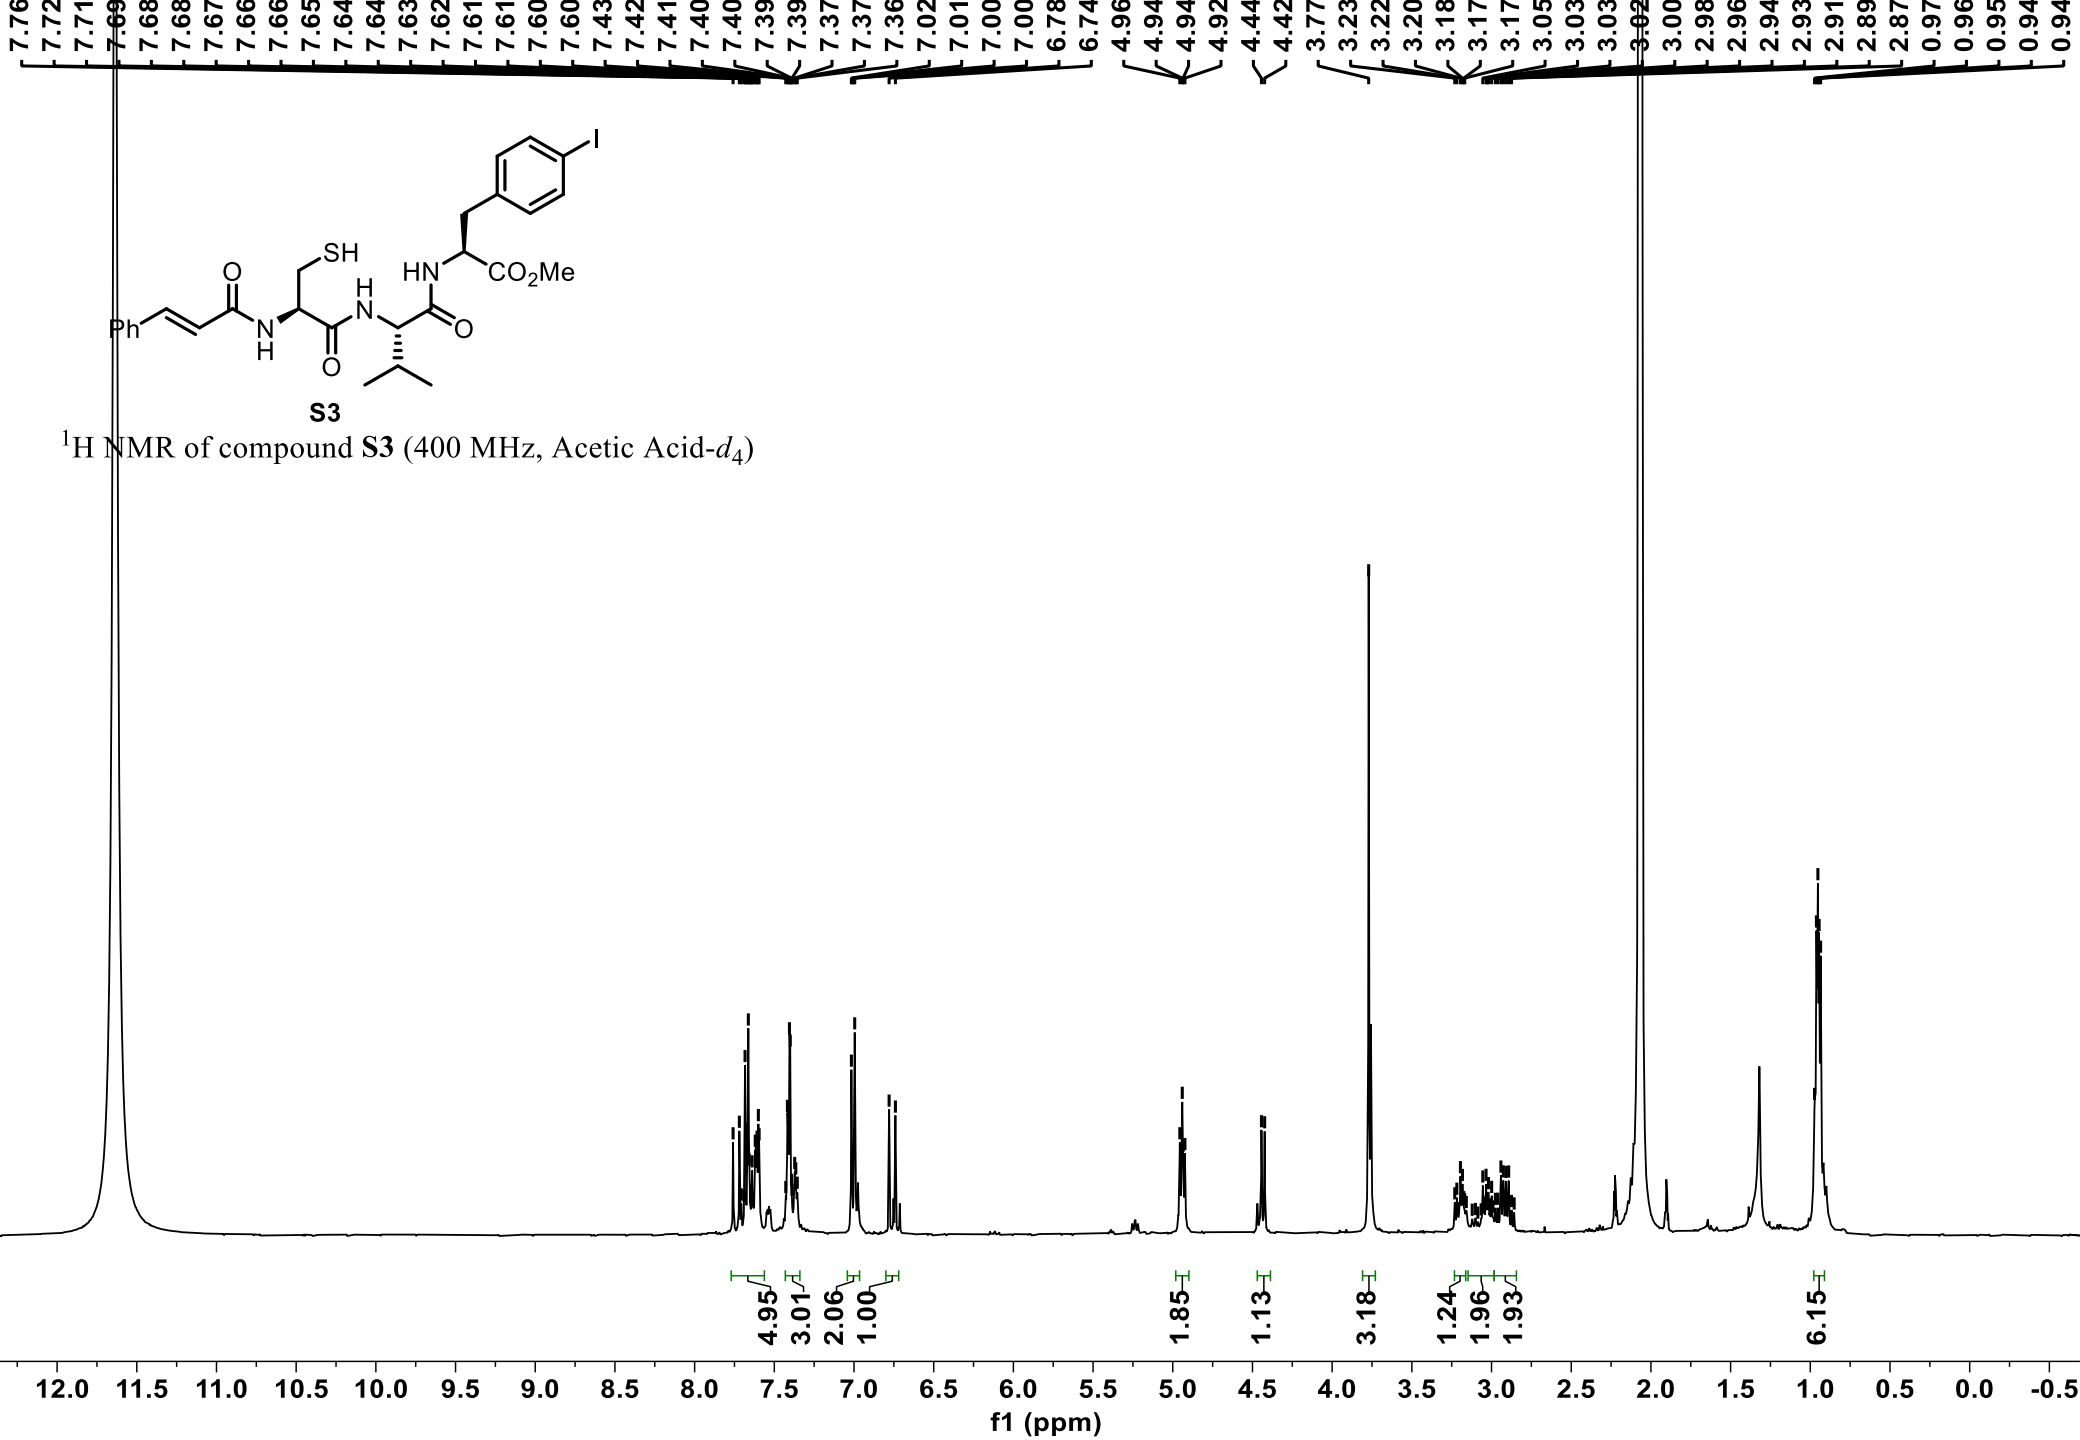



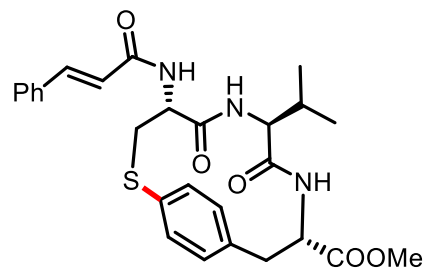

**3**

$^1\text{H}$  NMR of compound **3** (600 MHz, Acetic Acid- $d_4$ )

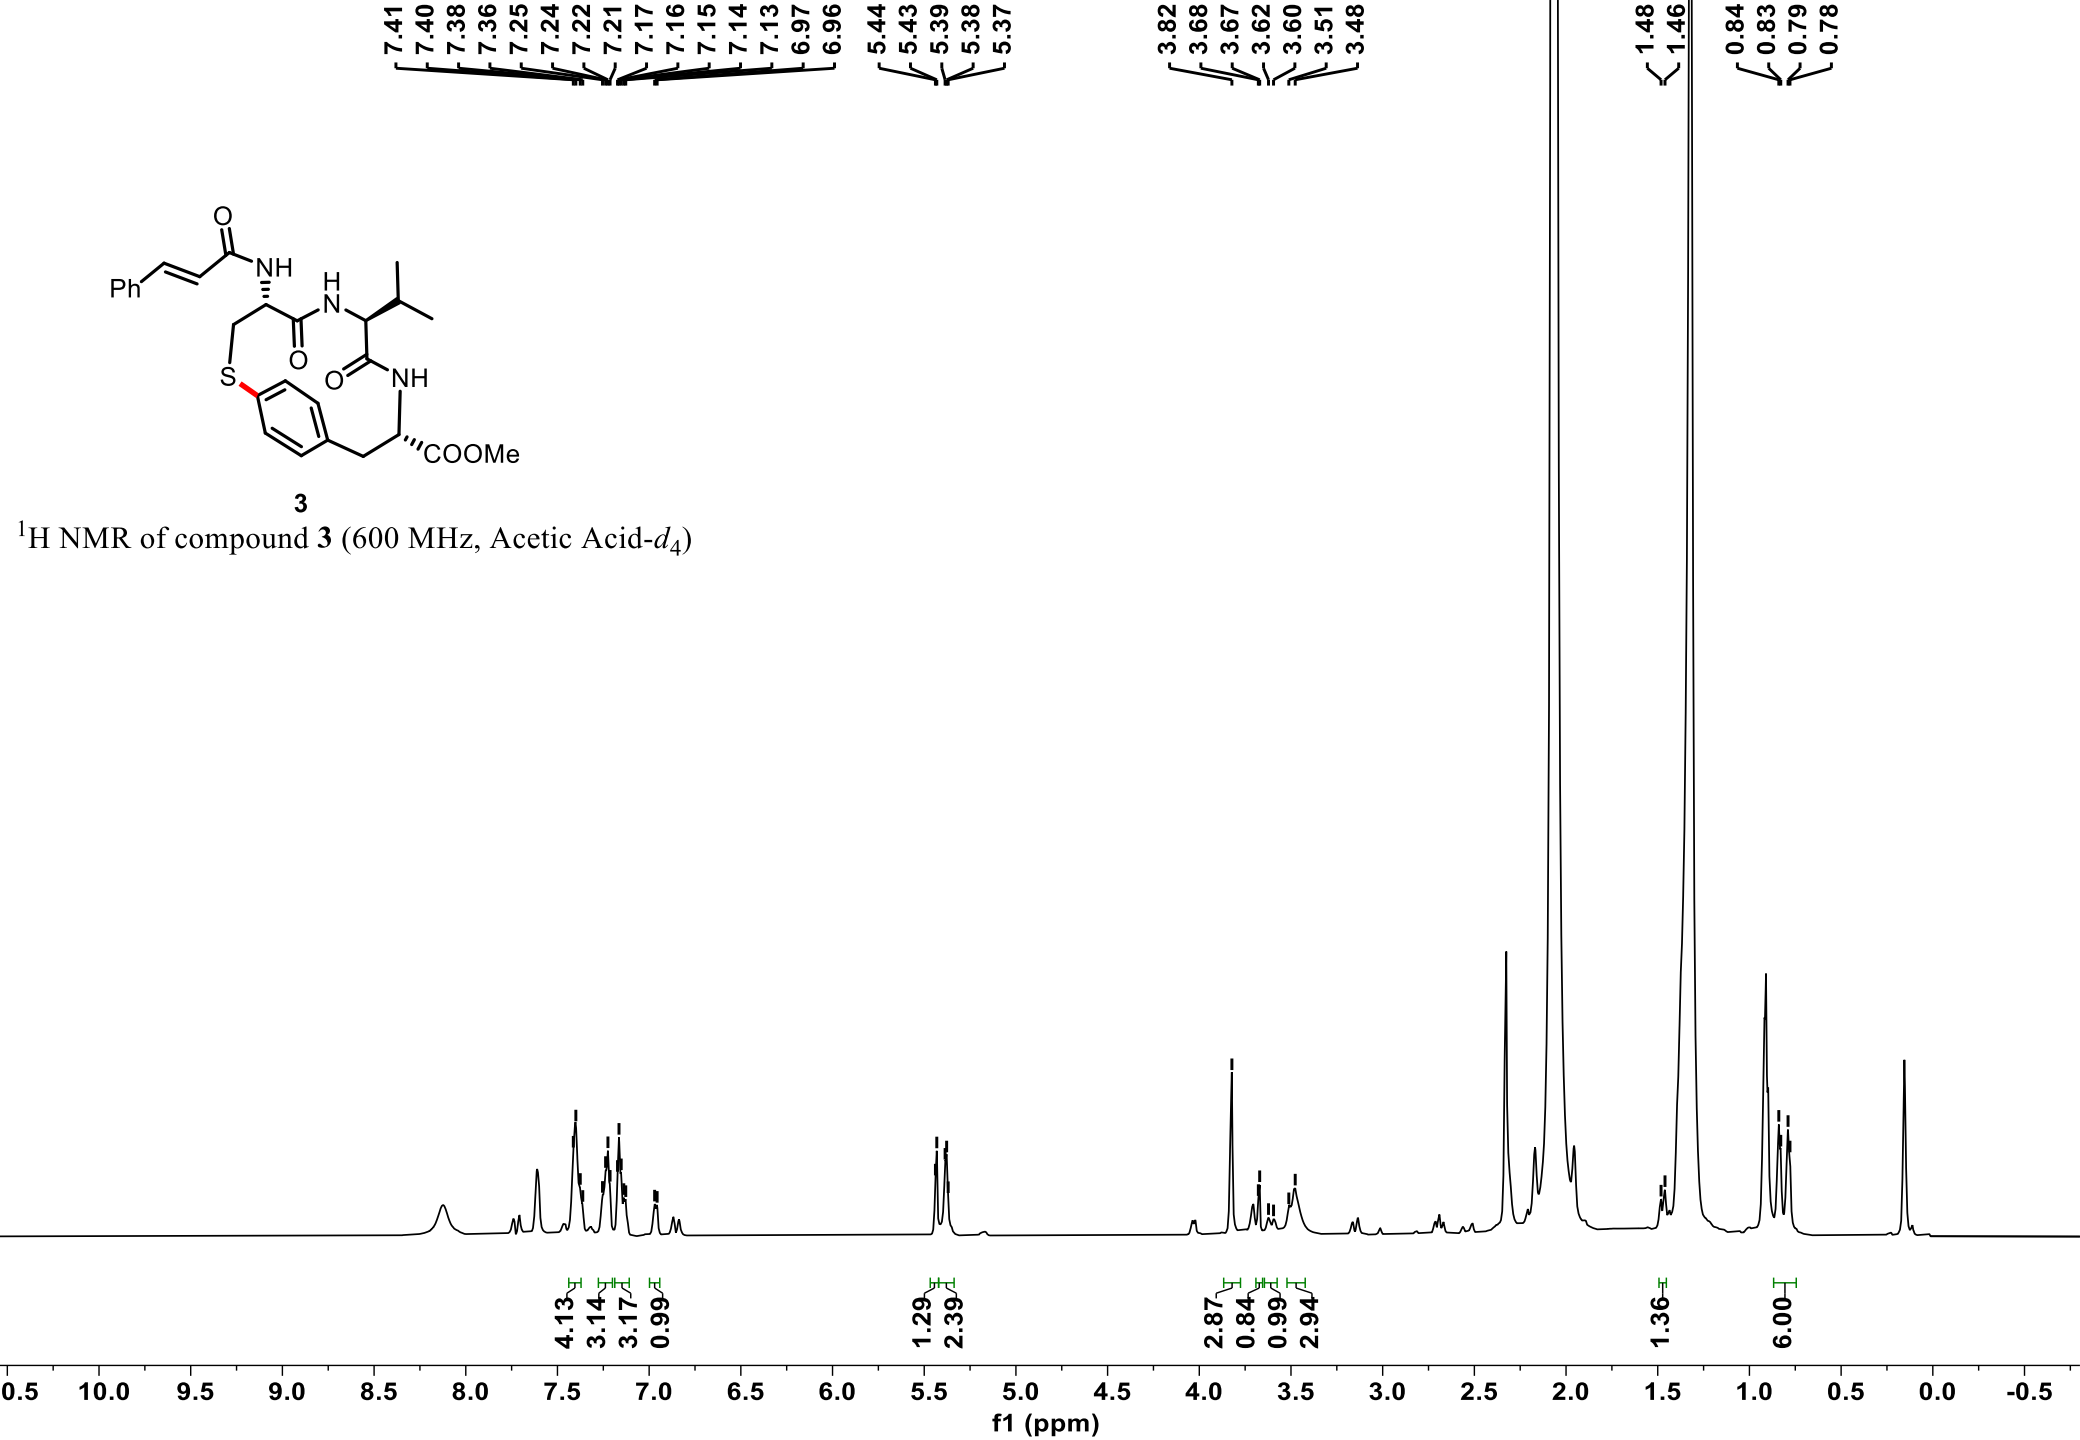



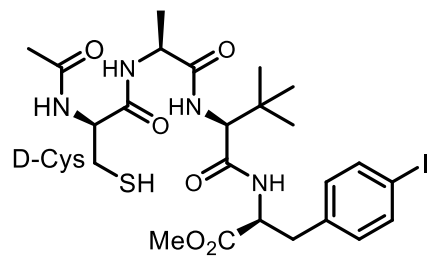

**S4**

$^1\text{H}$  NMR of compound S4 (400 MHz, MeOD)

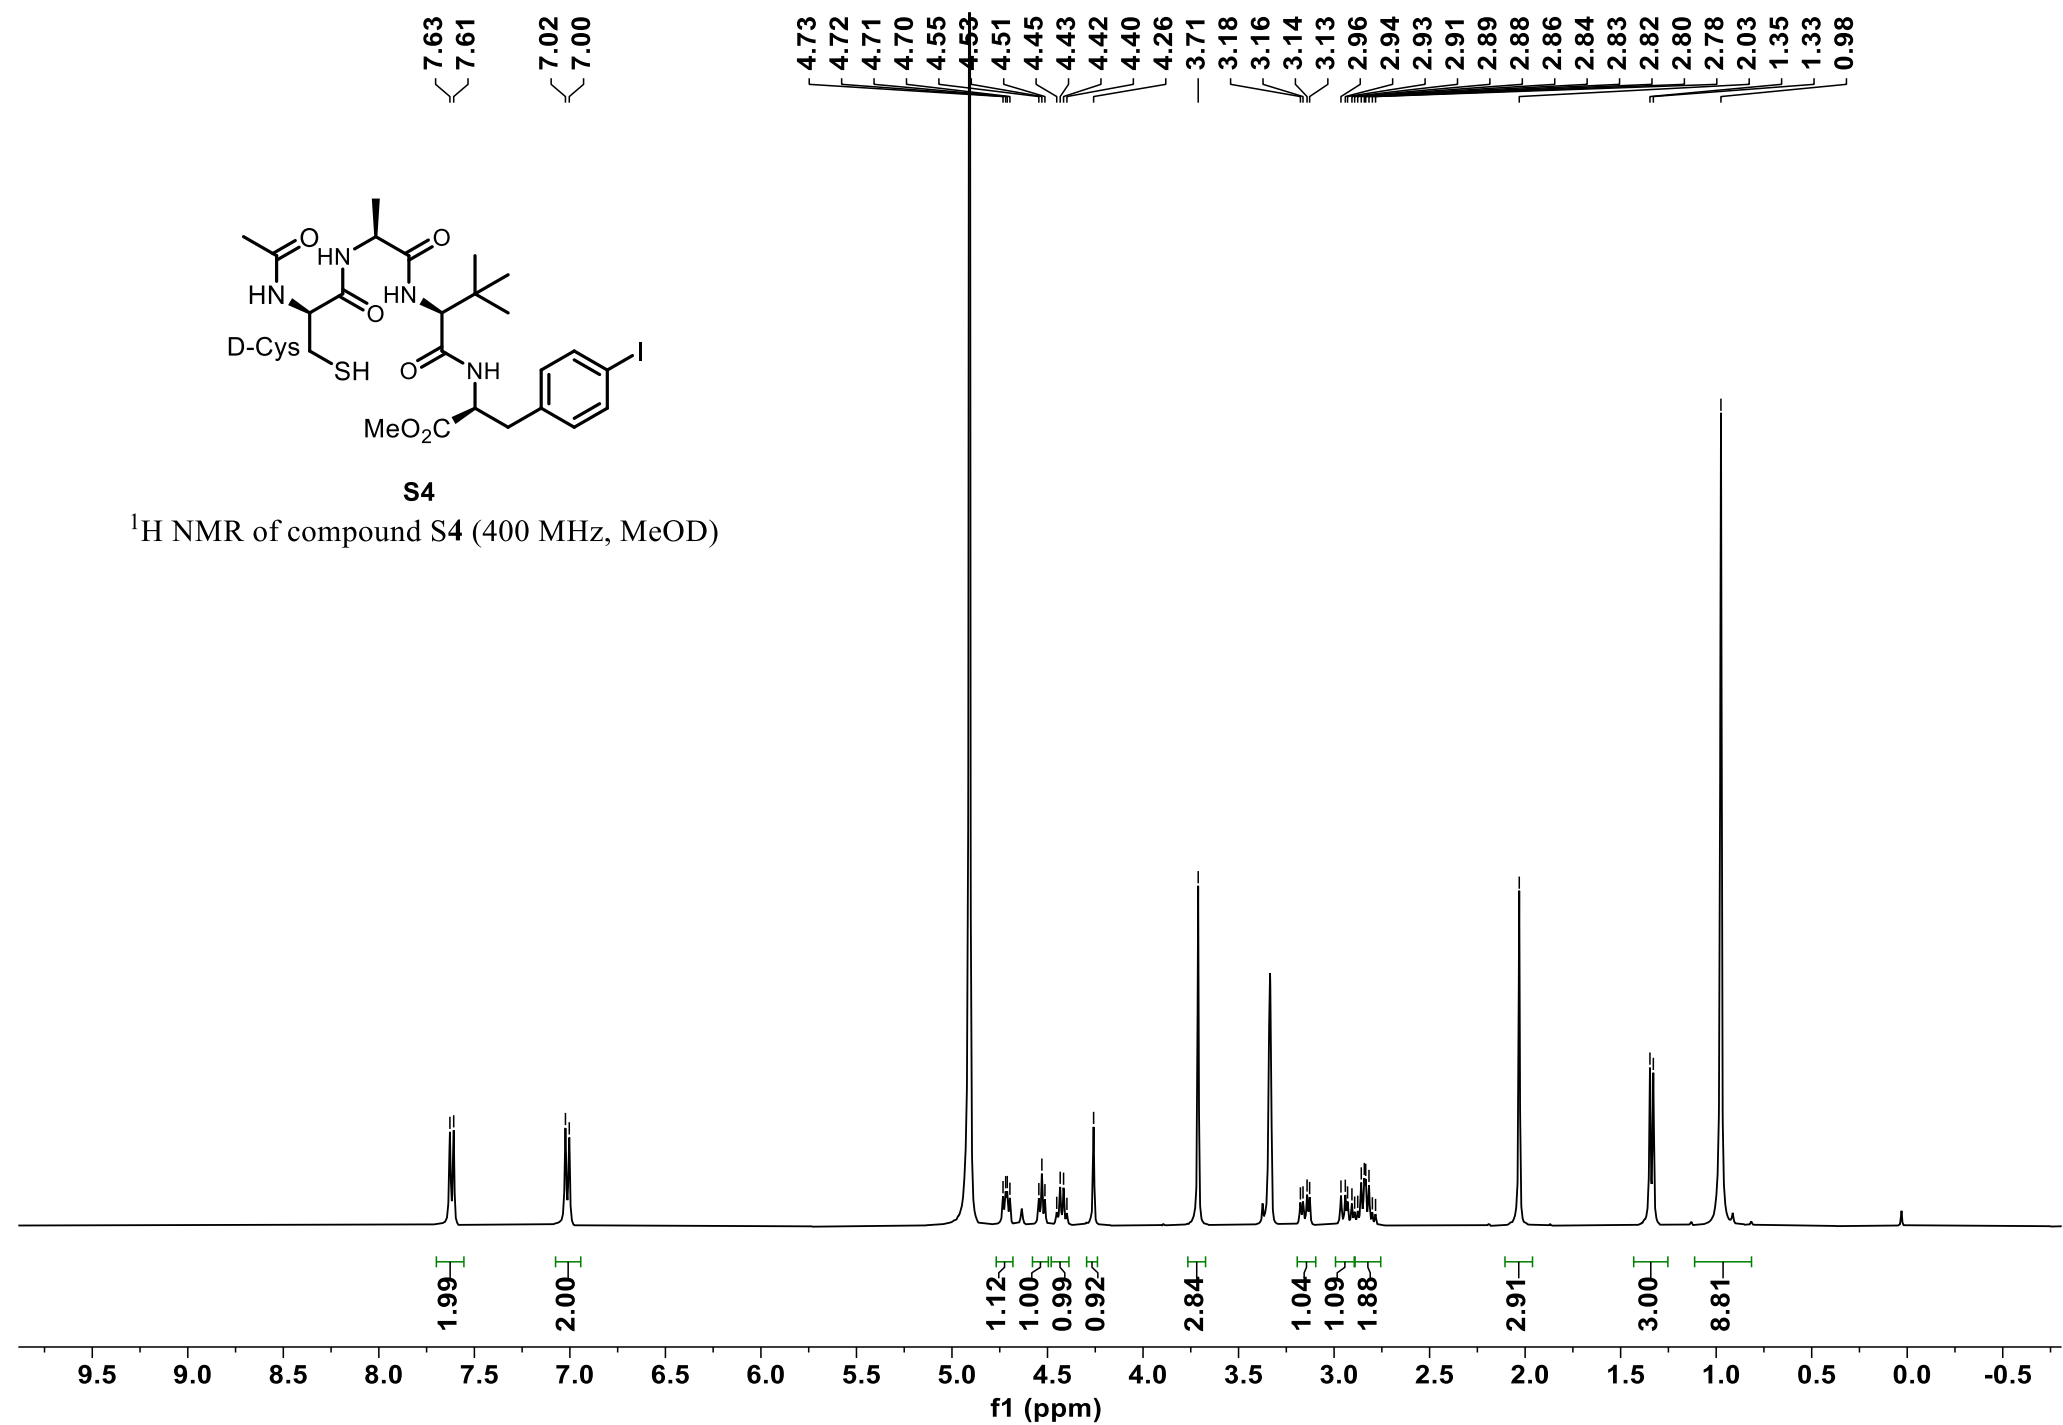

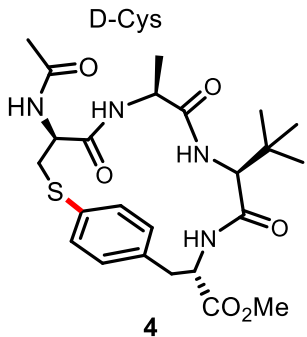

<sup>1</sup>H NMR of compound **4** (400 MHz, MeOD)

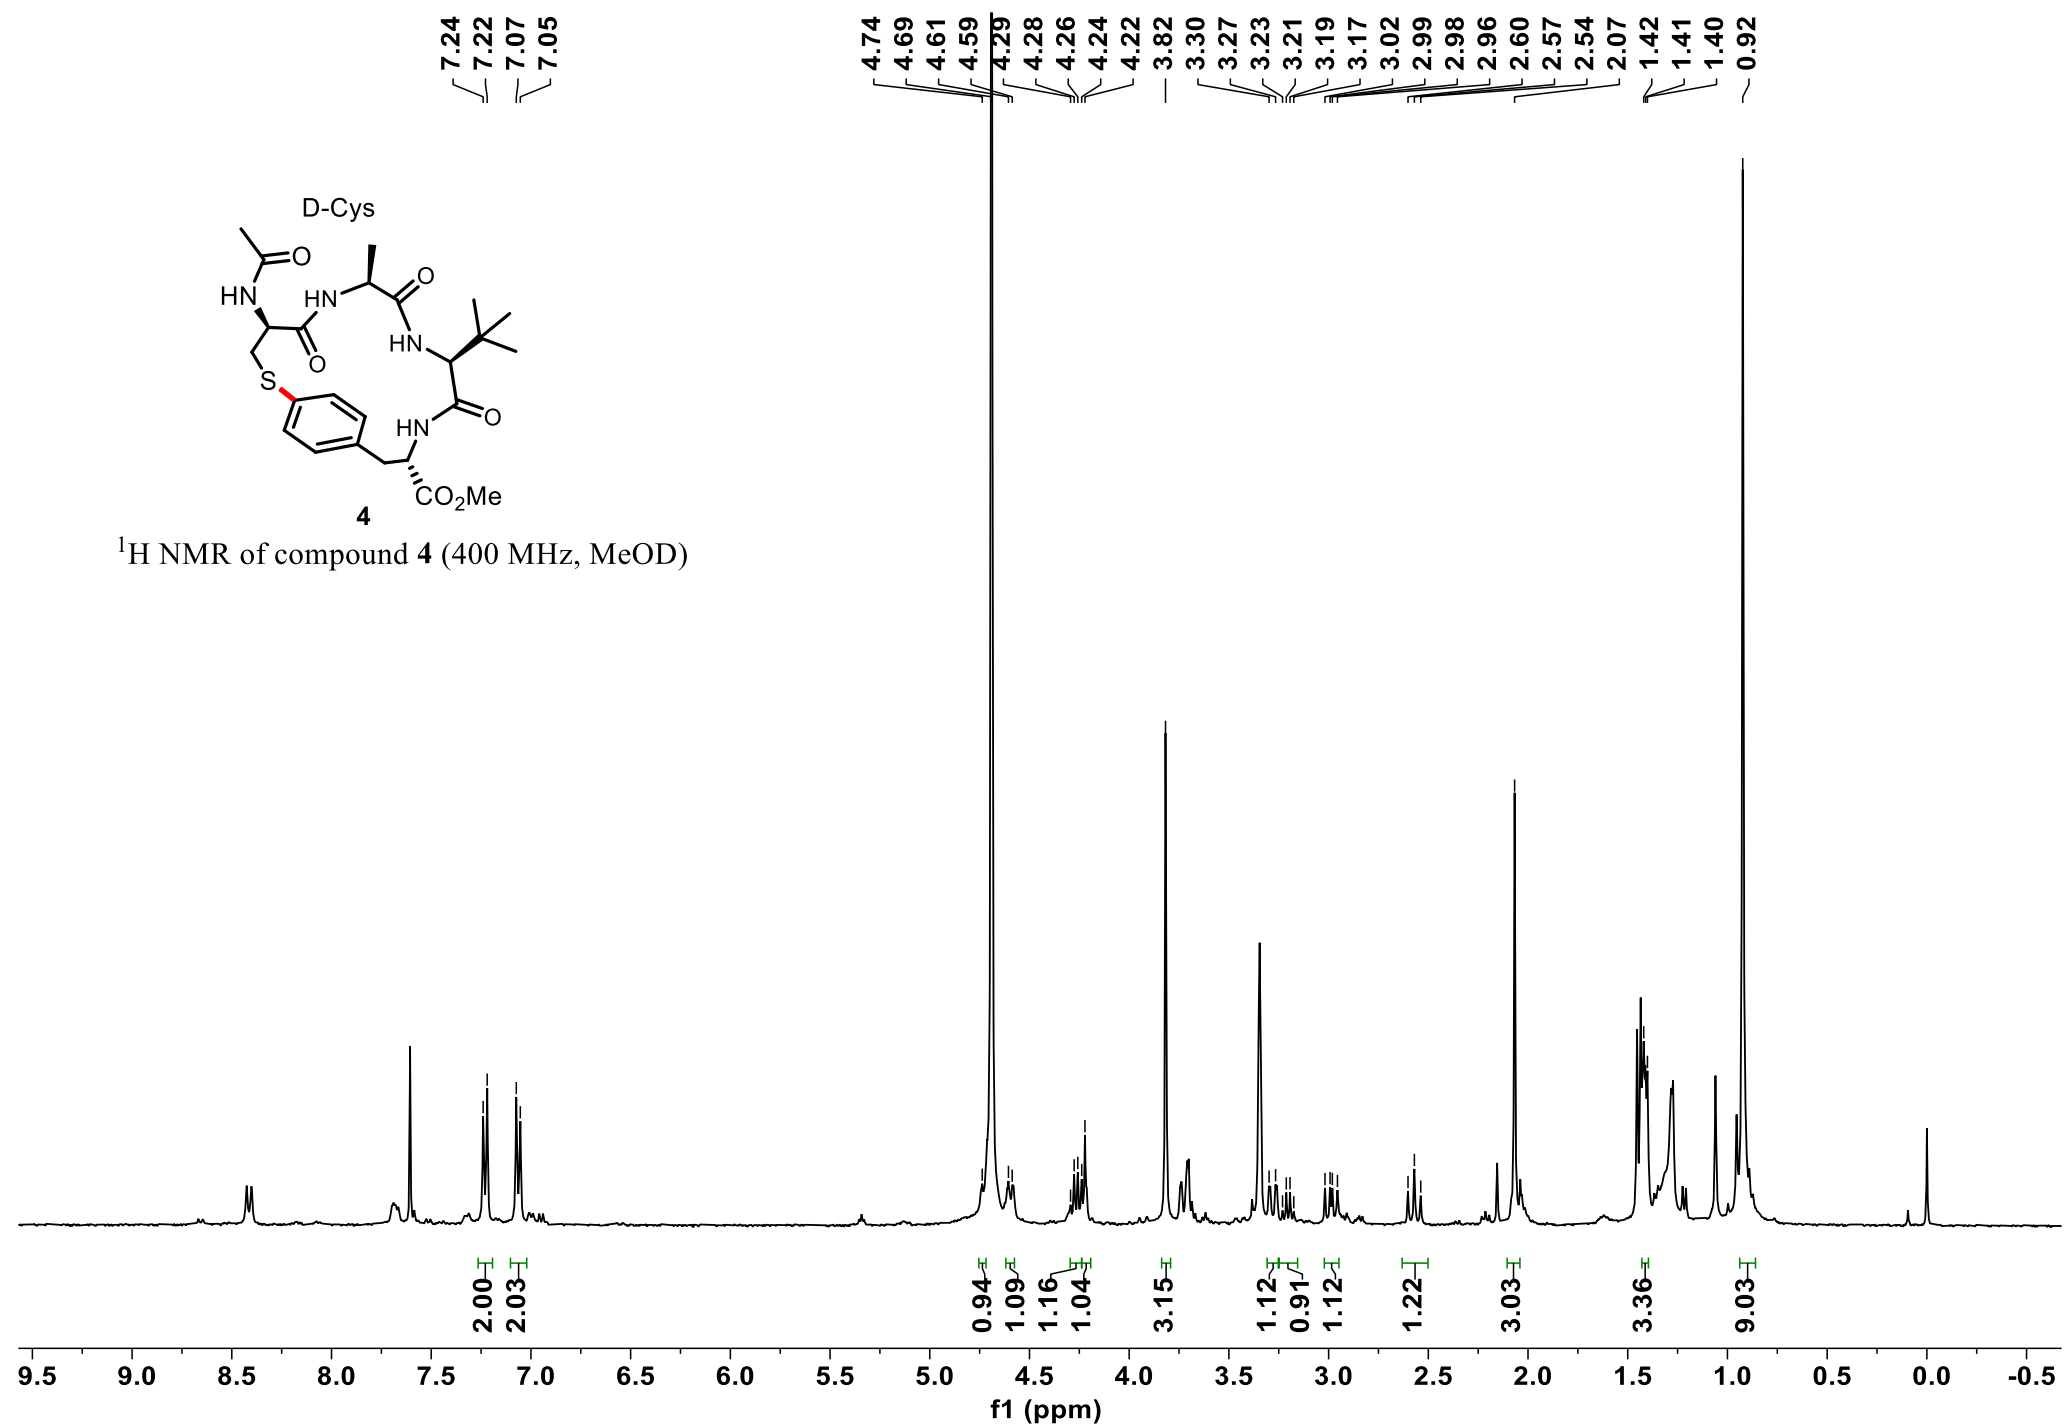

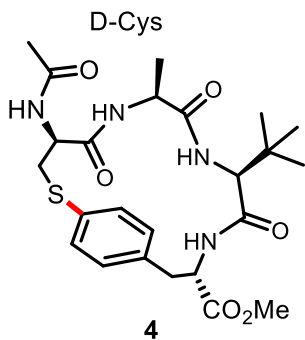

$^{13}\text{C}$  NMR of compound **4** (101 MHz,  $\text{DMSO-}d_6$ )

171.81  
171.74  
170.18  
169.68  
169.21

136.89  
133.95  
131.07  
130.50  
130.10

59.62  
55.22  
52.63  
52.54  
52.18

35.41  
31.73  
29.46  
29.13  
27.00  
26.86  
22.97  
19.16  
19.08

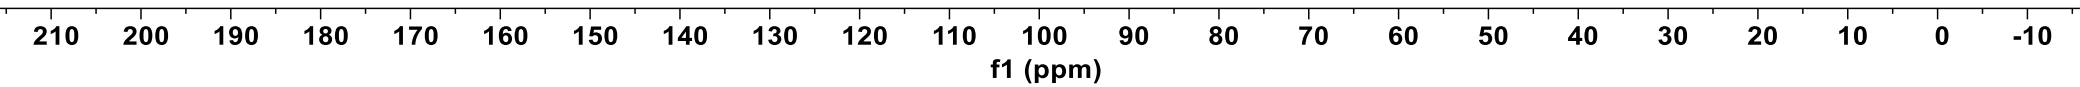

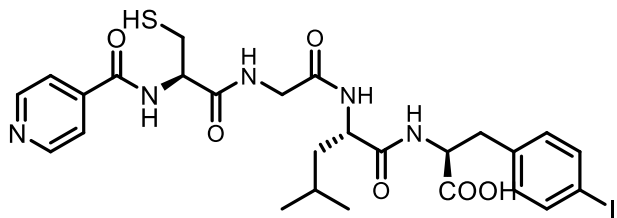

**S5**

<sup>1</sup>H NMR of compound S5 (400 MHz, Acetic Acid-*d*<sub>4</sub>)

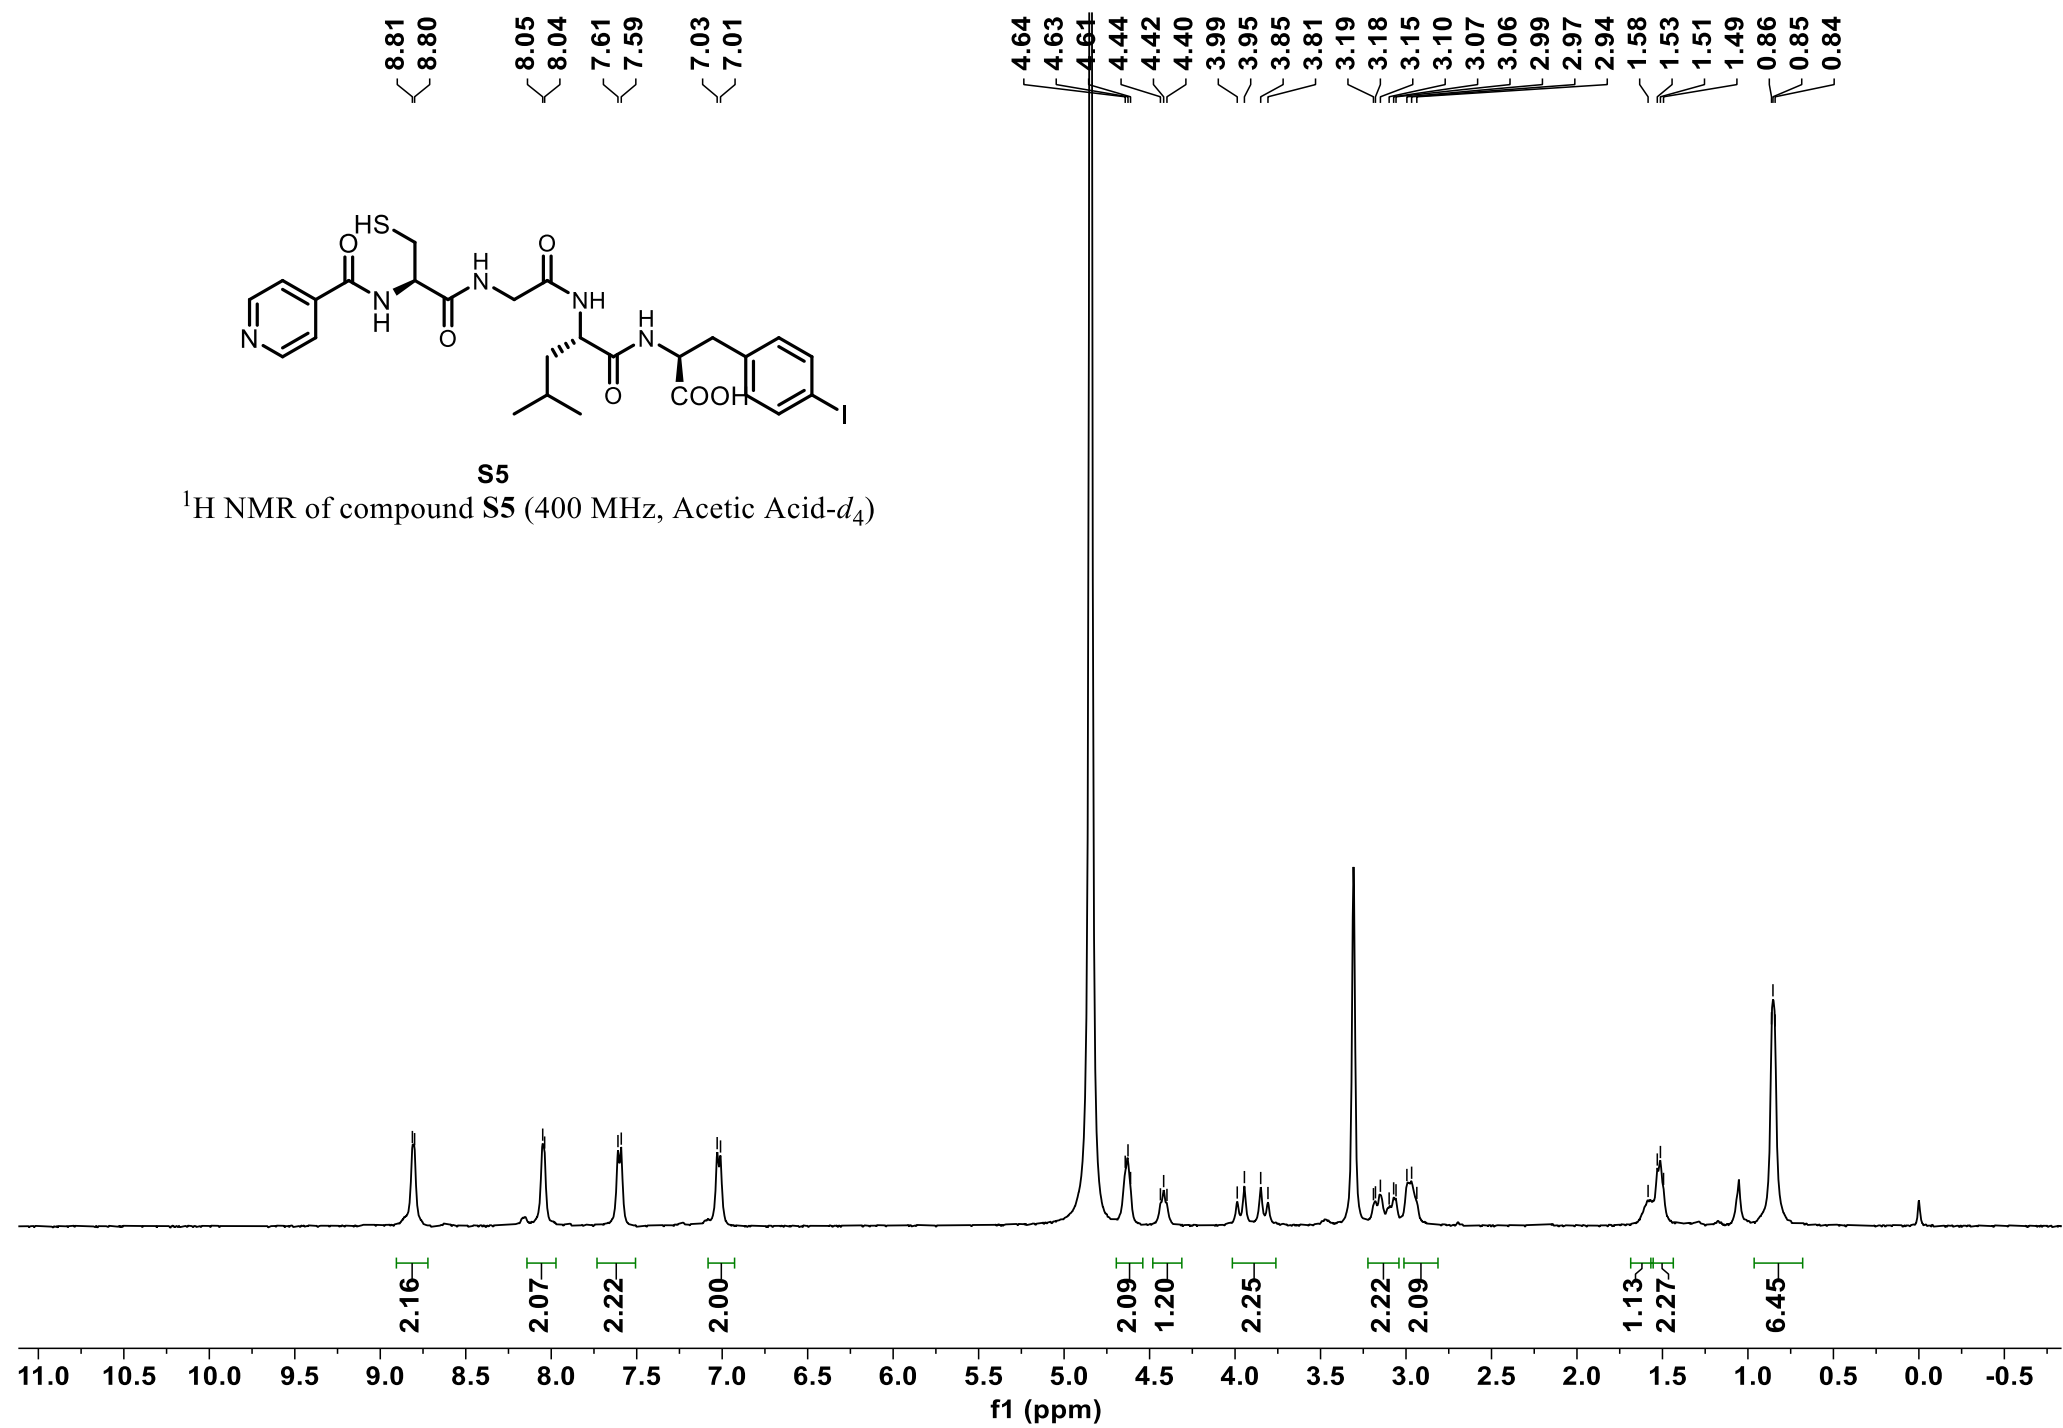

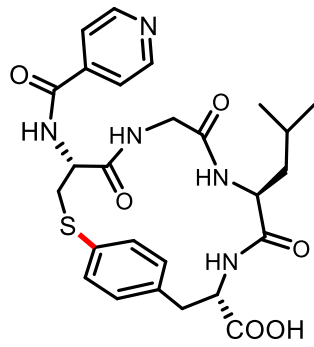

5

$^1\text{H}$  NMR of compound 5 (400 MHz, 5% $\text{D}_2\text{O}$  in  $\text{DMSO}-d_6$ )

8.72  
8.71  
7.81  
7.80  
7.78  
7.76  
7.75  
7.74  
7.25  
7.23  
7.21  
7.07  
7.05  
4.53  
4.52  
4.50  
4.42  
4.41  
4.39  
4.38  
3.77  
3.73  
3.50  
3.49  
3.47  
3.46  
3.45  
3.29  
3.28  
3.25  
3.13  
3.11  
3.10  
3.08  
3.07  
2.86  
2.83  
2.82  
2.80  
1.53  
1.52  
1.50  
1.49  
1.47  
1.43  
1.43  
1.42  
1.41  
1.40  
1.39  
0.86  
0.85  
0.80  
0.78

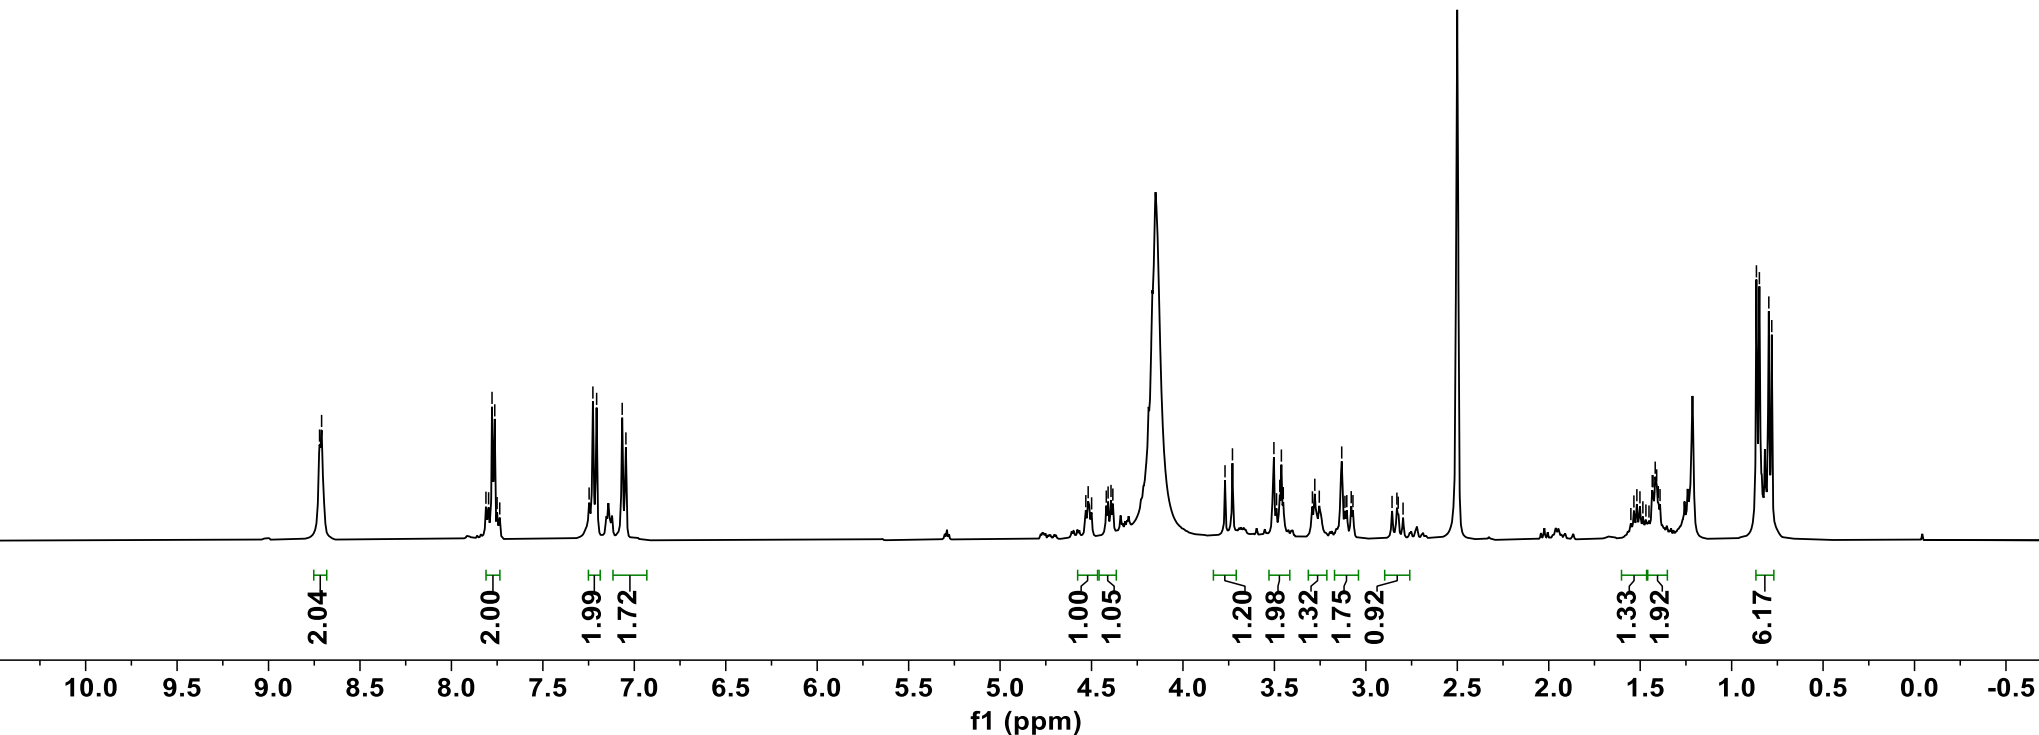

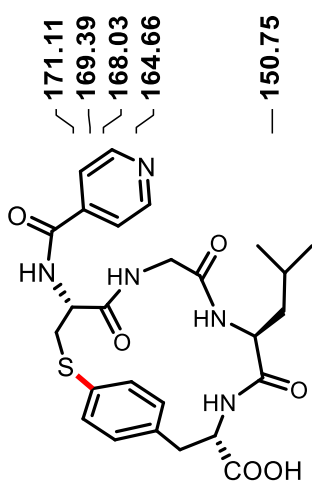

**5**

$^{13}\text{C}$  NMR of compound **5** (101 MHz,  $\text{DMSO-}d_6$ )

171.11  
169.39  
168.03  
164.66

150.75

141.16  
136.42  
133.11  
130.45  
130.11

121.86

55.80  
53.37  
51.13

42.66

35.36  
31.73  
27.01  
24.51  
23.13  
22.59  
22.54

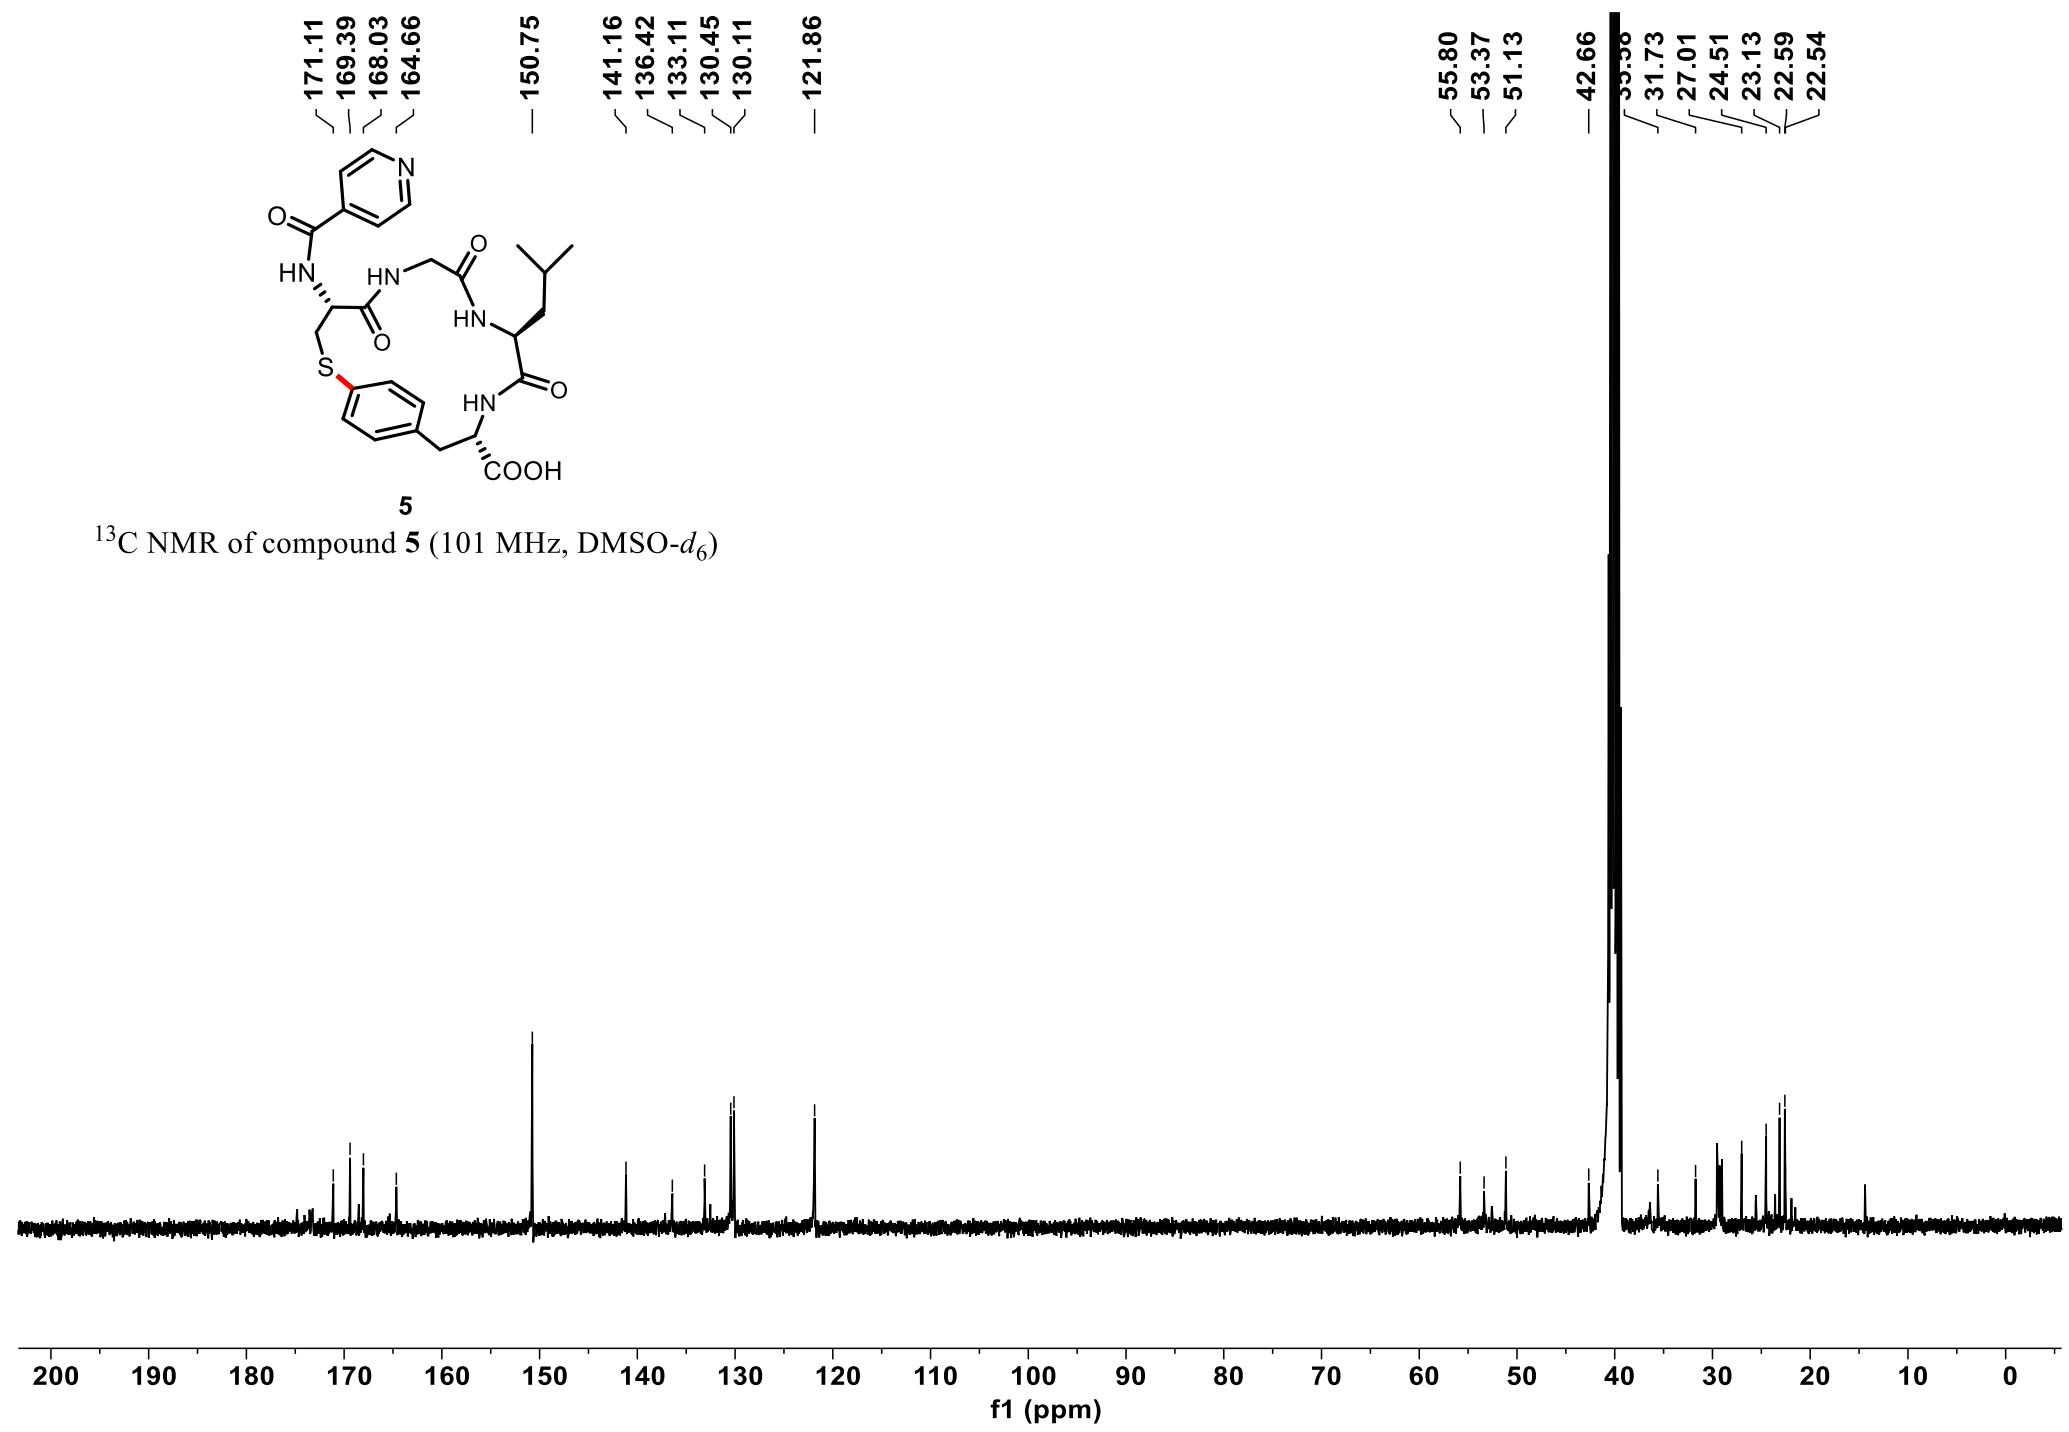



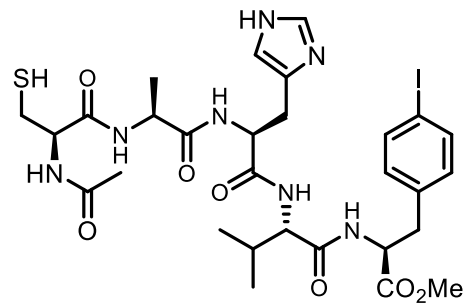

**S6**

$^1\text{H}$  NMR of compound S6 (400 MHz, Acetic Acid- $d_4$ )

8.68  
7.61  
7.59  
7.57  
7.15  
7.03  
7.01

4.69  
4.48  
4.47  
4.45  
4.30  
4.28  
4.16  
4.14  
3.68  
3.33  
3.14  
3.13  
3.10  
3.09  
2.97  
2.95  
2.94  
2.92  
2.89  
2.87  
2.85  
2.84  
2.82  
2.80  
2.78  
1.35  
1.33  
0.93  
0.91  
0.90

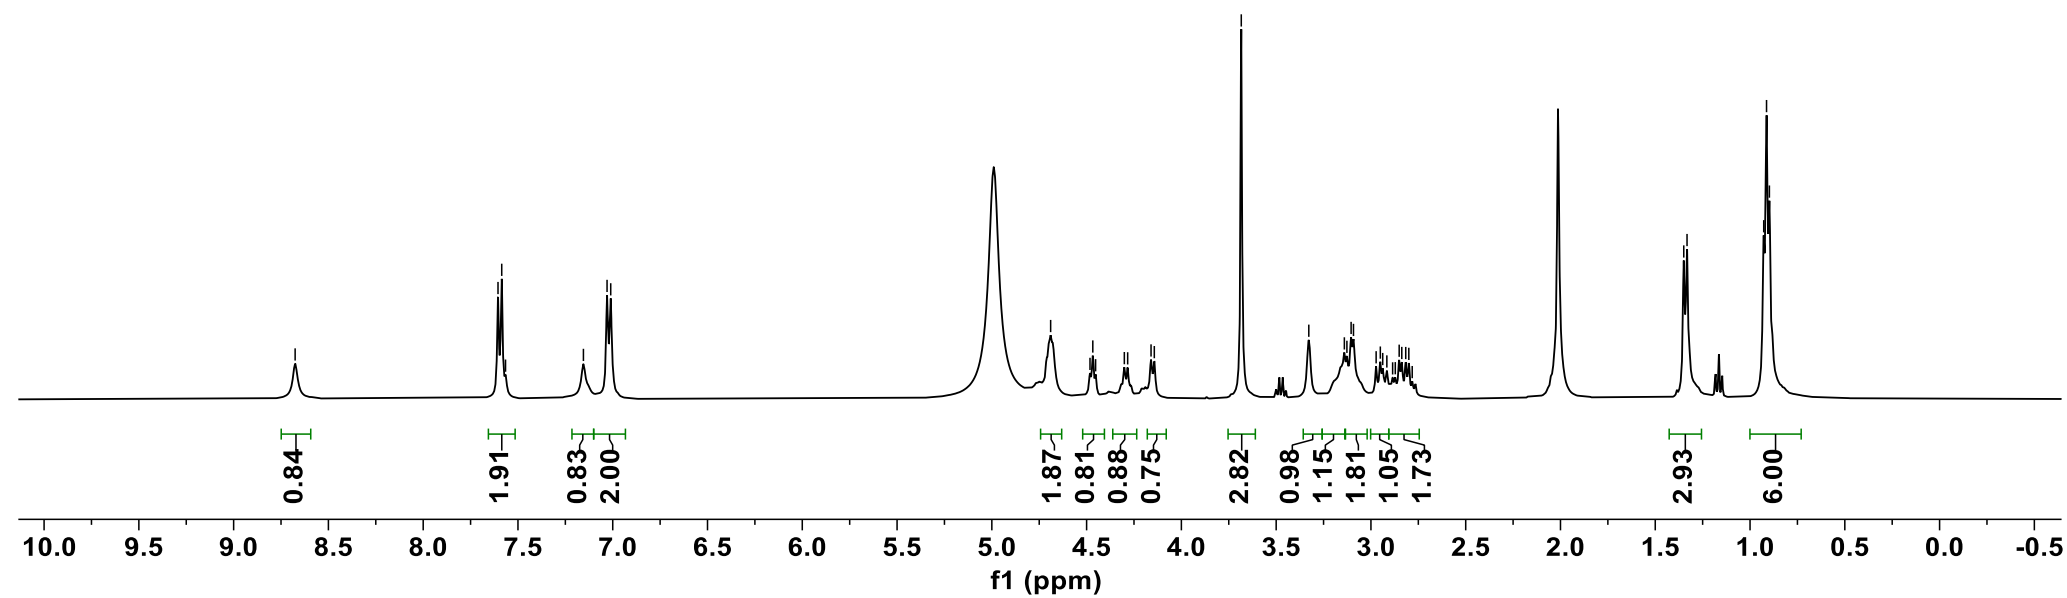

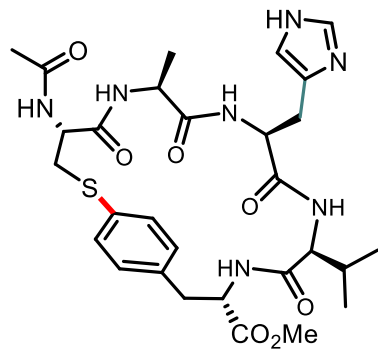

**6**

$^1\text{H}$  NMR of compound **6** (400 MHz, MeOD)

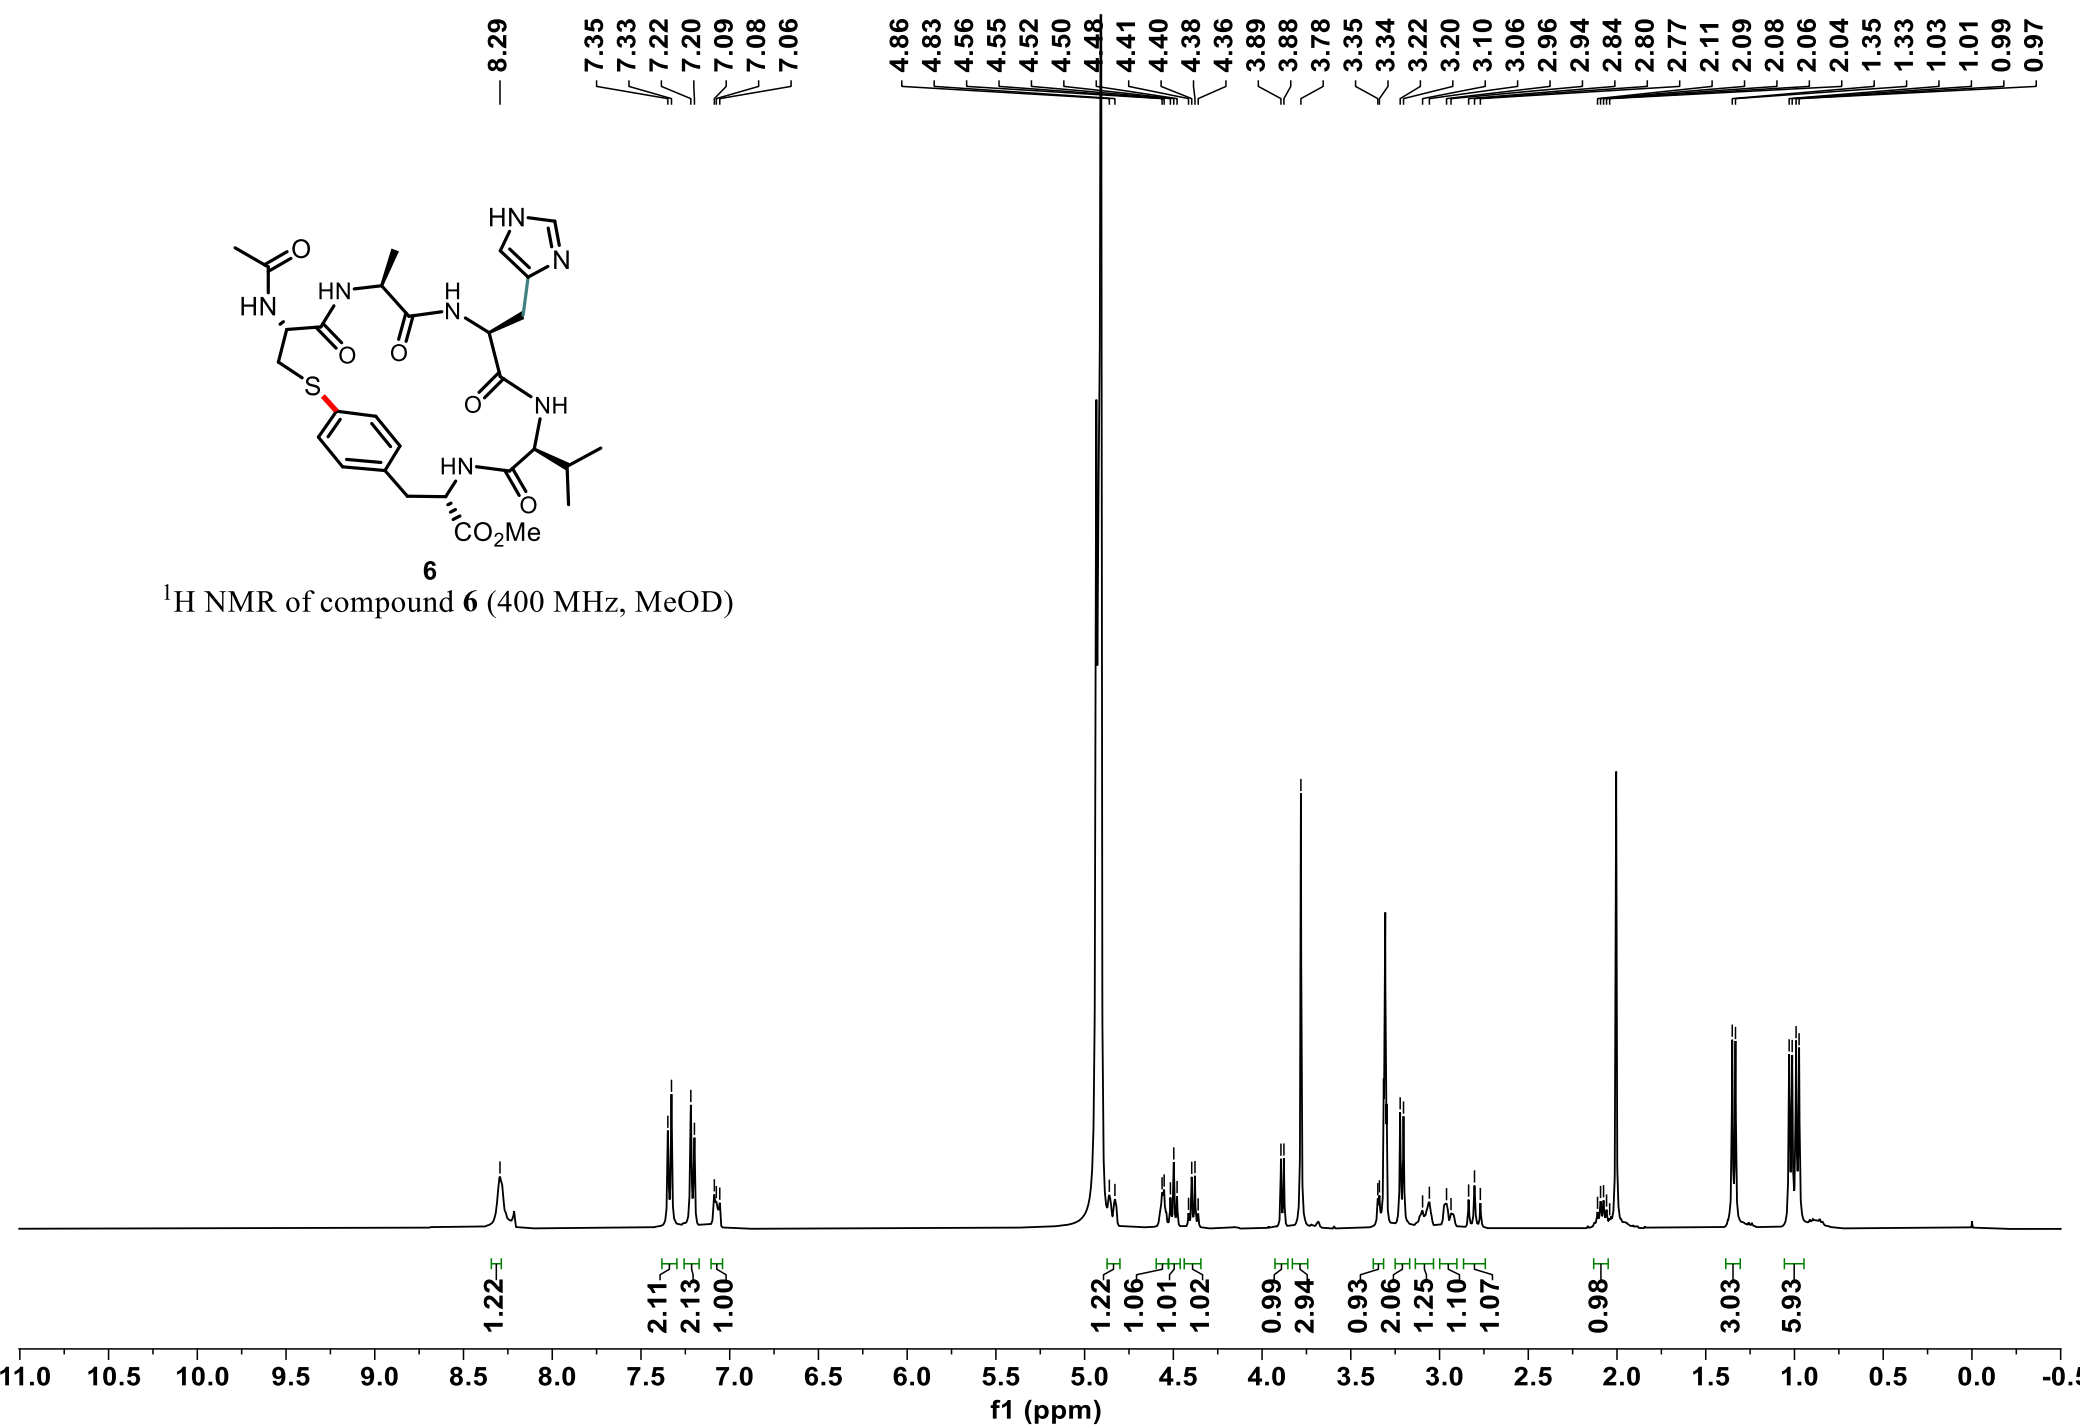

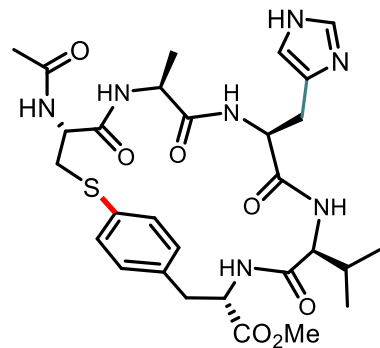

**6**

$^{13}\text{C}$  NMR of compound **6** (101 MHz, MeOD)

172.92  
172.35  
172.03  
171.72  
171.36  
169.62

135.90  
134.42  
133.39  
130.88  
129.81  
129.62  
— 118.41

59.41  
53.25  
53.14  
51.52  
51.39  
48.94

37.94  
36.13  
29.83  
28.24  
20.97  
18.14  
17.14  
15.55

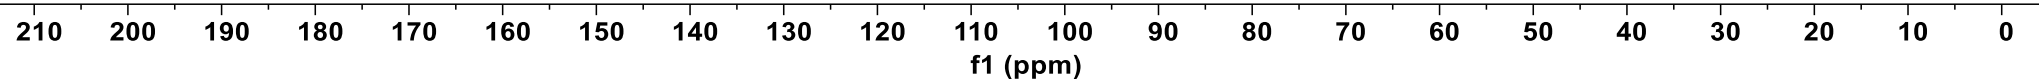

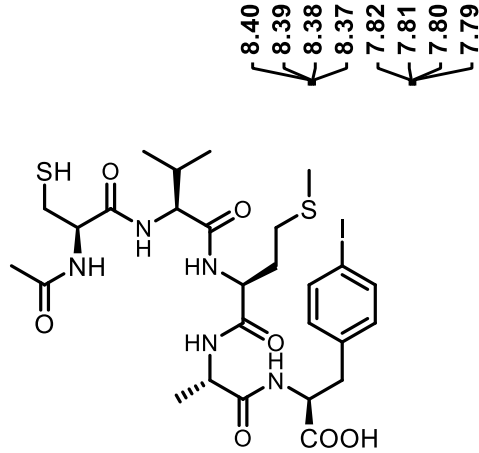

**S7**

<sup>1</sup>H NMR of compound S7 (400 MHz, MeOD)

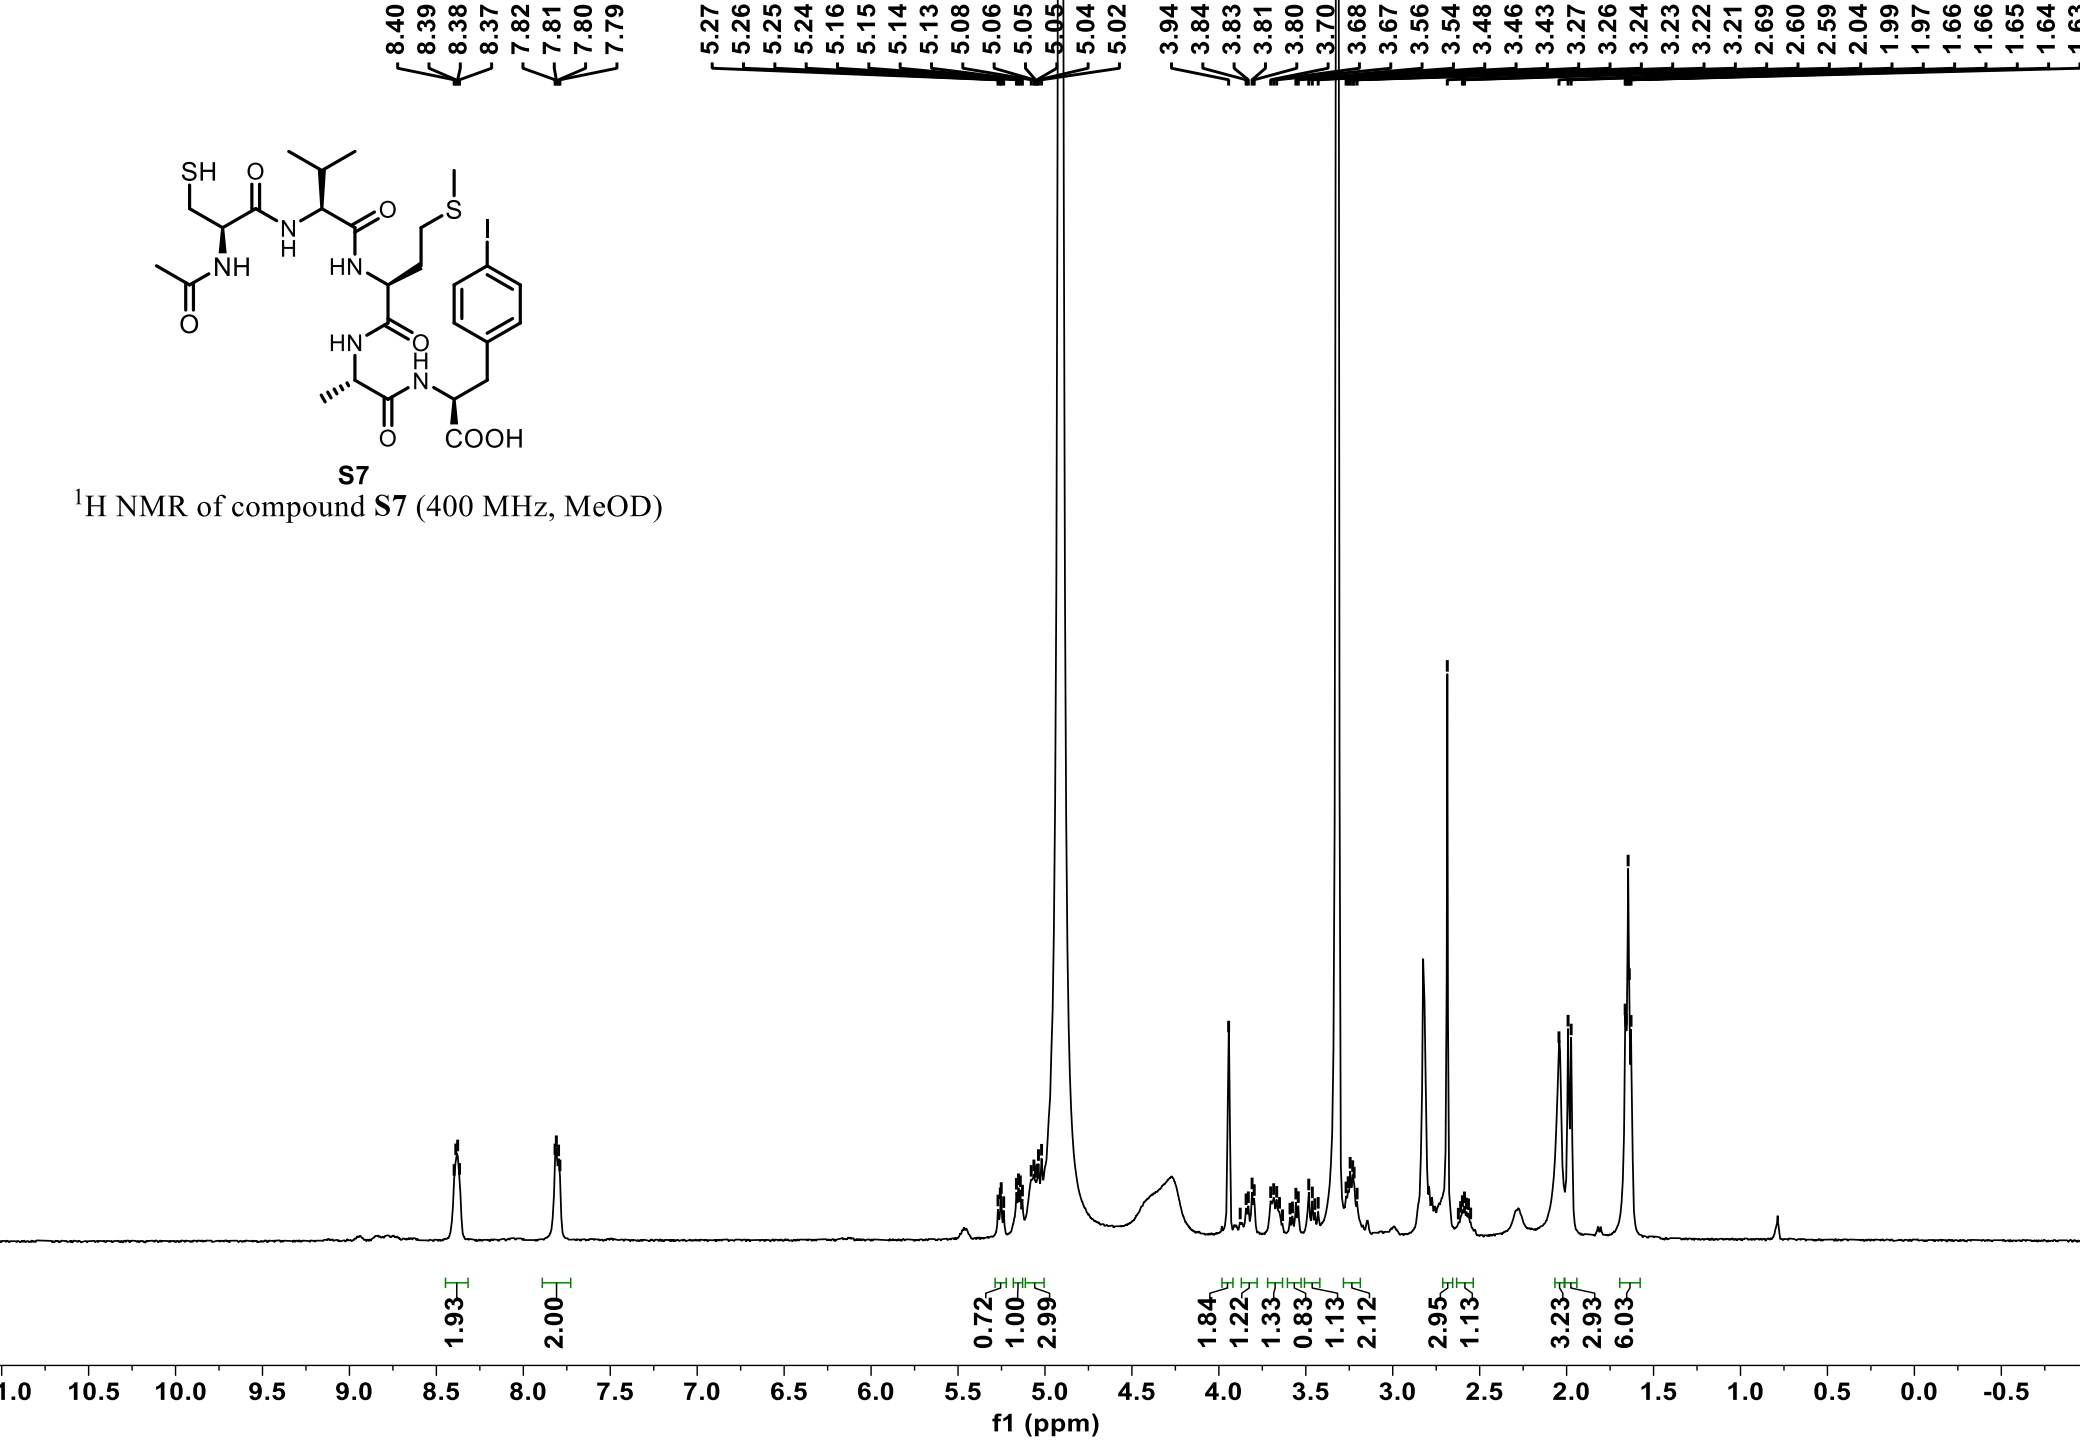

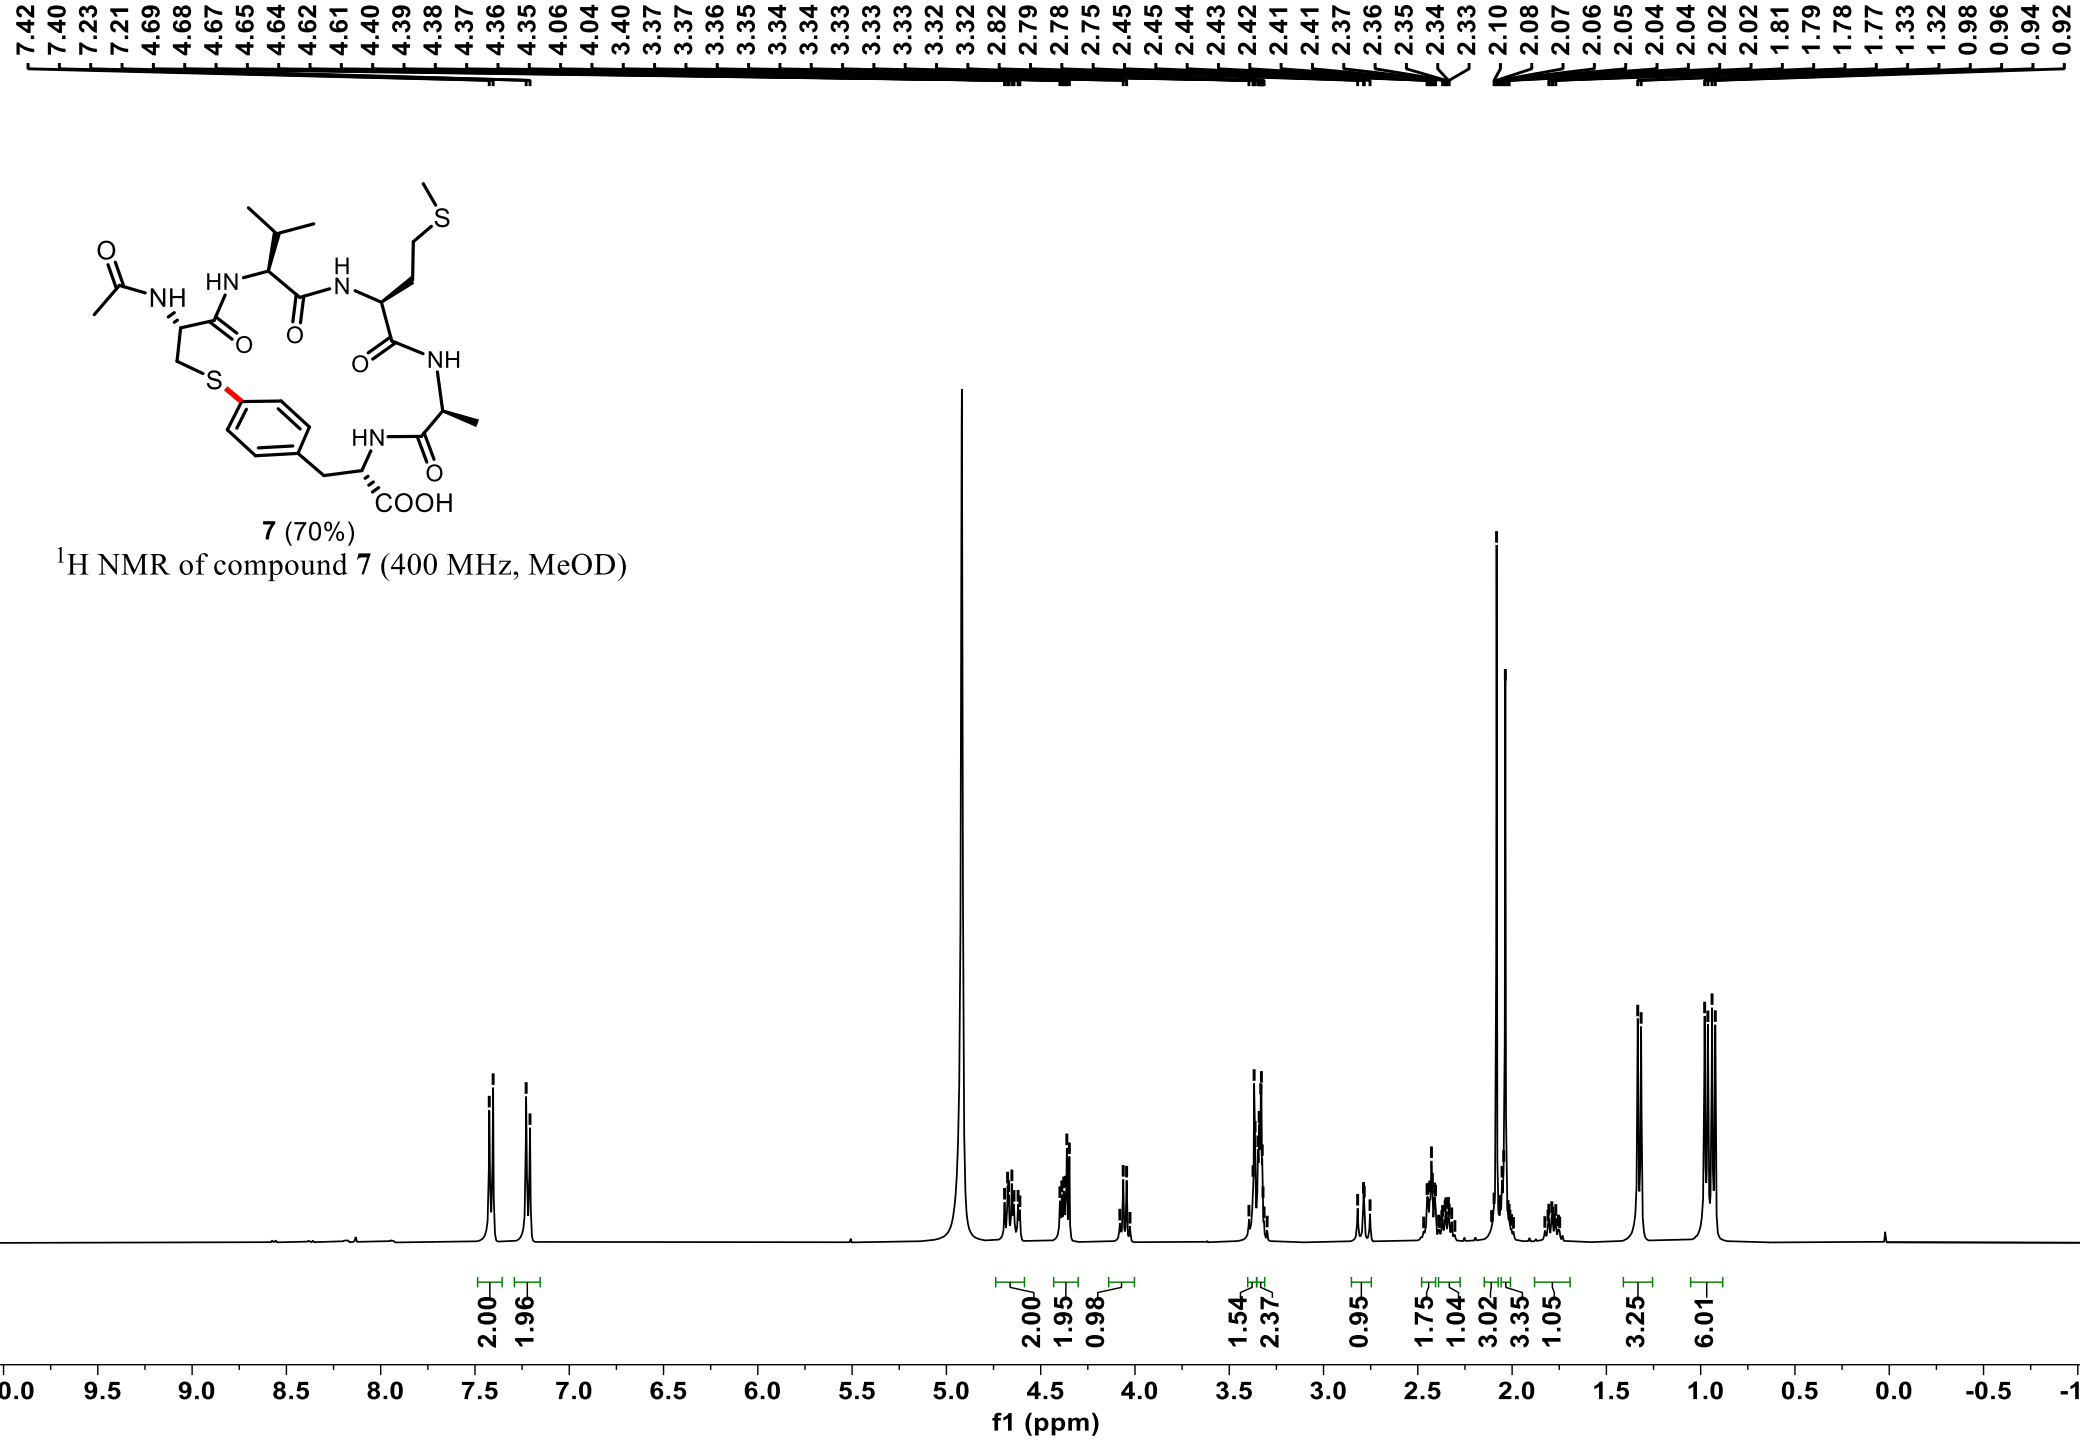



7.61  
7.60  
7.59  
7.59  
7.58  
7.27  
7.25  
7.24  
7.24  
7.23  
7.22  
7.22  
7.21  
7.21  
7.20  
7.20  
7.19  
7.19  
7.18  
7.17  
7.17  
7.02  
7.01  
7.01  
7.00  
6.99  
4.45  
4.19  
4.19  
3.60  
3.59  
3.58  
3.56  
3.35  
3.34  
3.33  
3.32  
3.30  
3.28  
3.28  
3.27  
3.26  
3.26  
3.25  
3.24  
3.22  
3.01  
3.00  
2.98  
2.96  
2.69  
2.67  
2.66  
2.62  
2.59  
2.58  
2.56  
1.35  
1.24  
0.84  
0.83  
0.80  
0.78

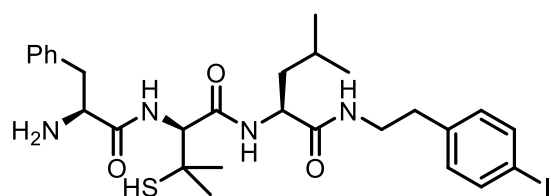

**S8**

$^1\text{H}$  NMR of compound **S8** (400 MHz,  $\text{DMSO-}d_6$ )

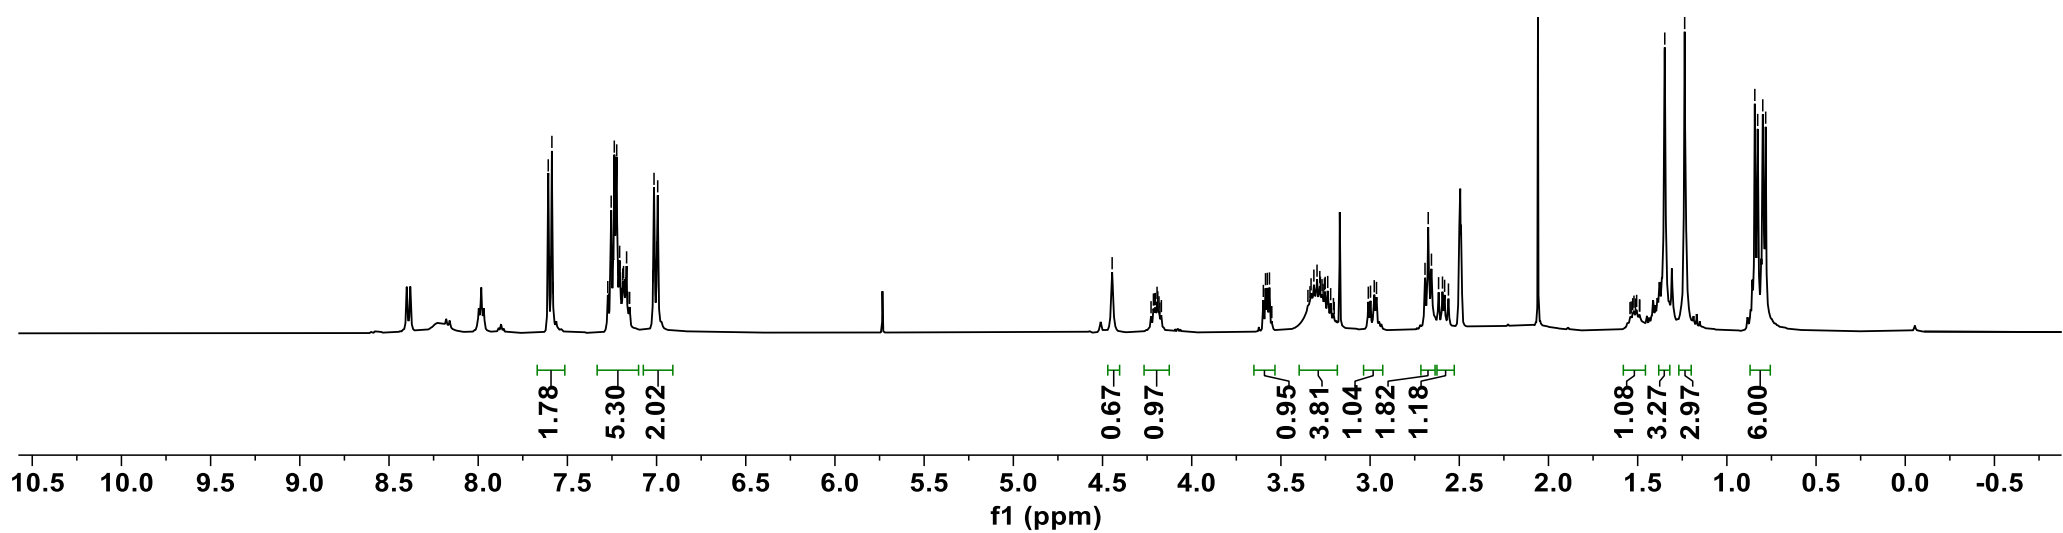

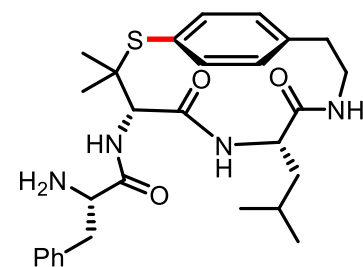

**8**

$^1\text{H}$  NMR of compound **8** (400 MHz, MeOD)

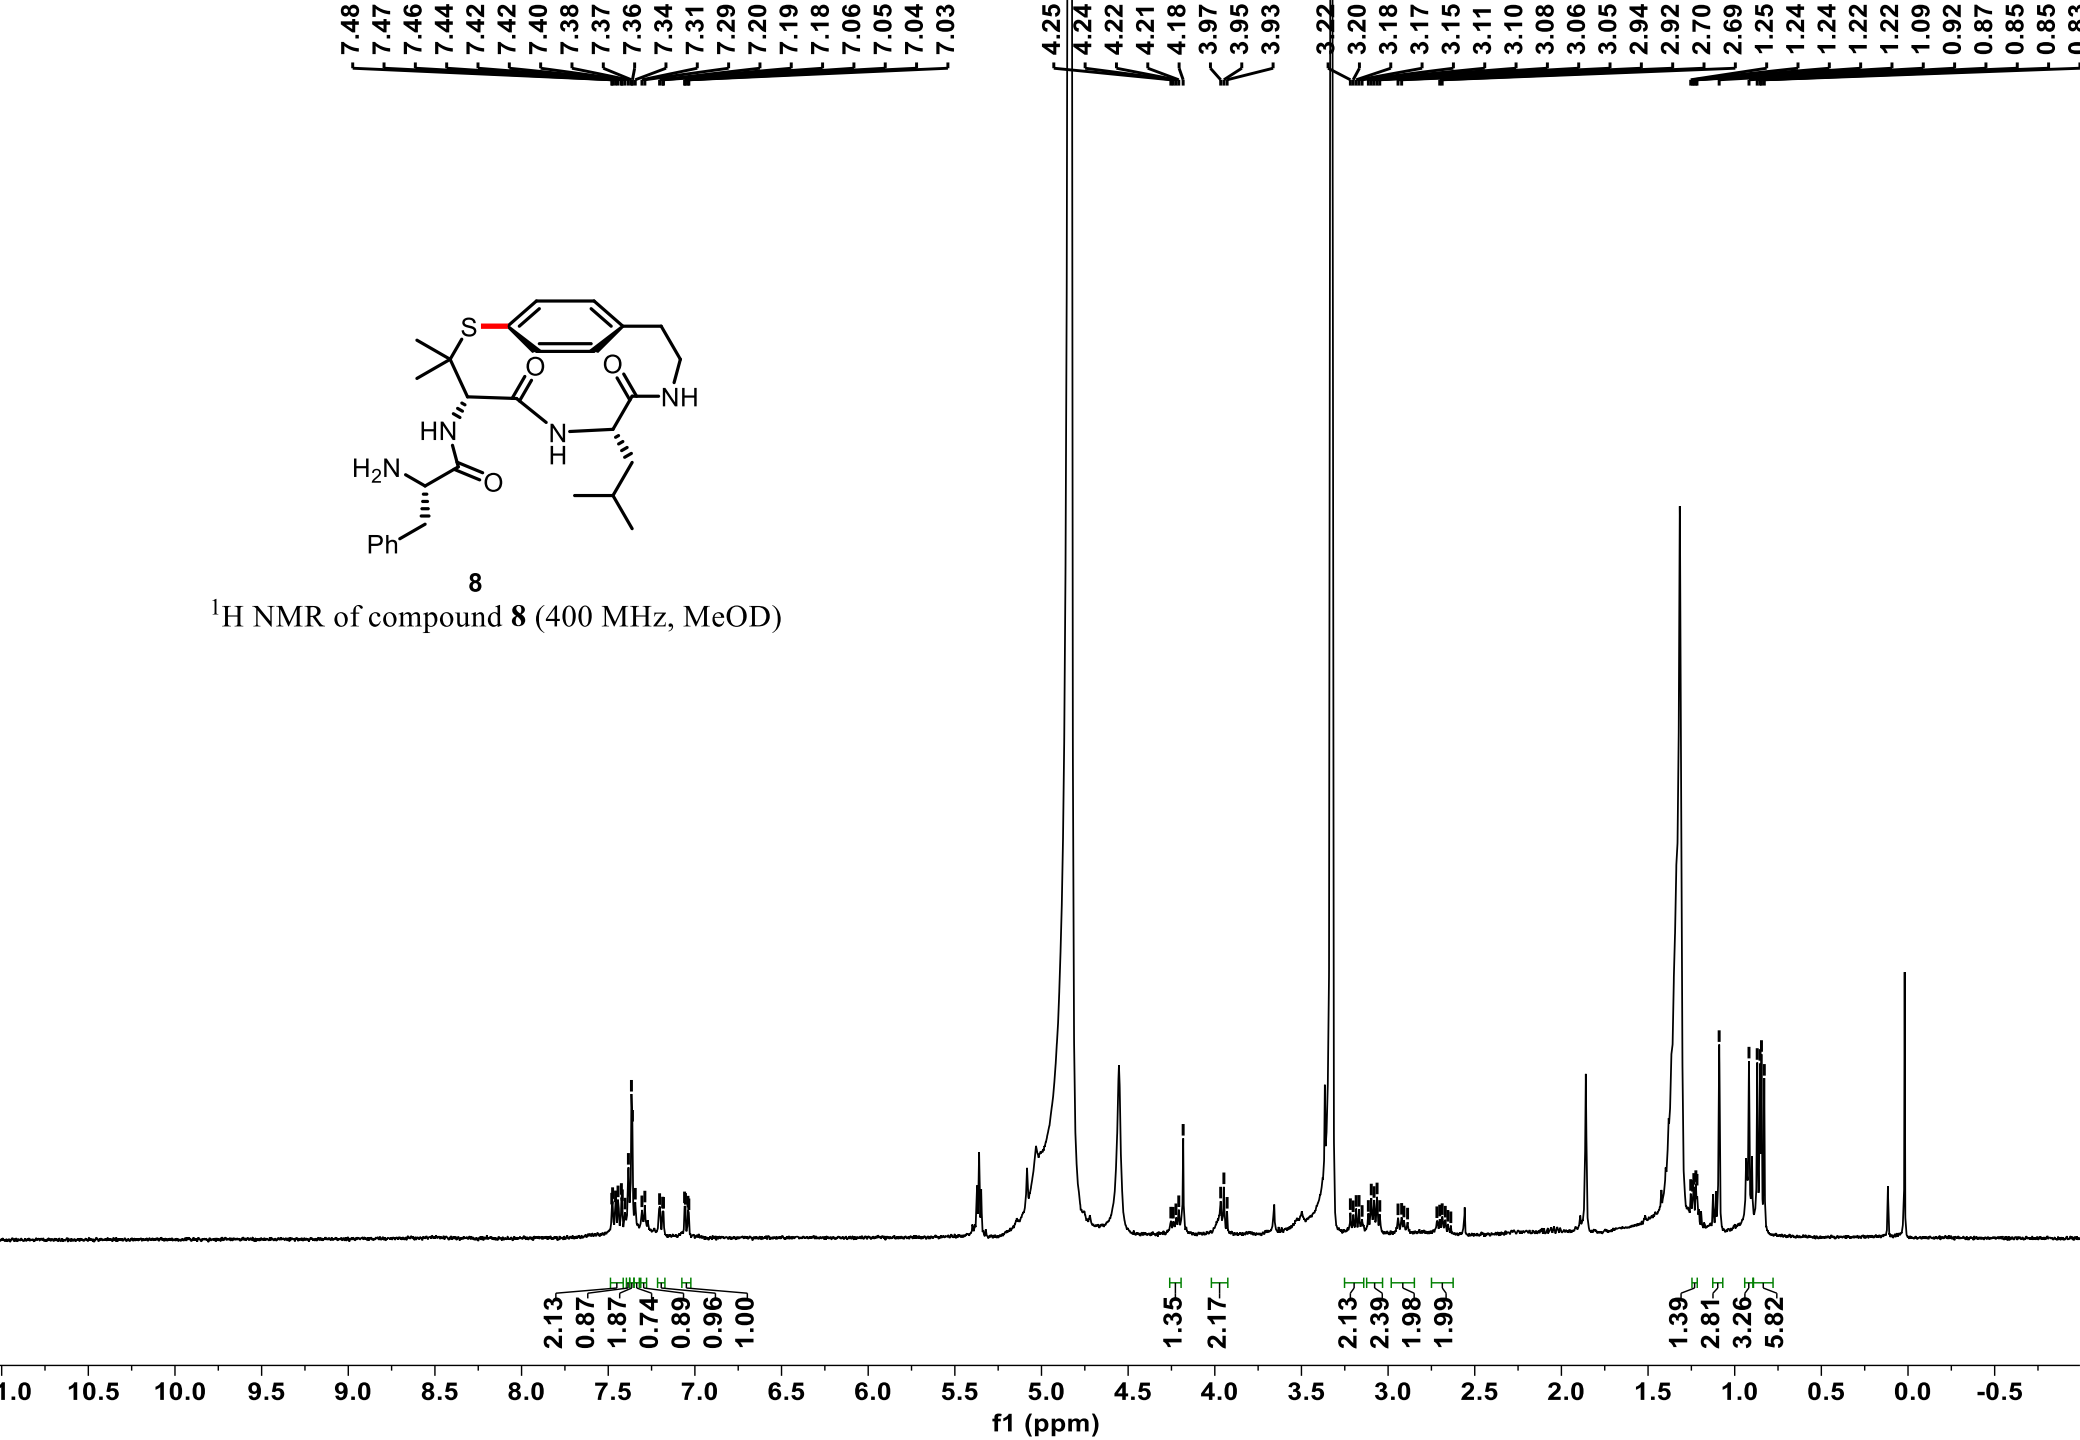



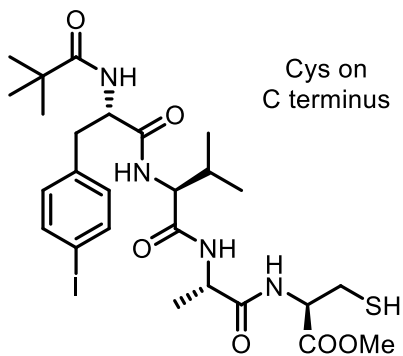

**S9**

$^1\text{H}$  NMR of compound **S9** (400 MHz, MeOD)

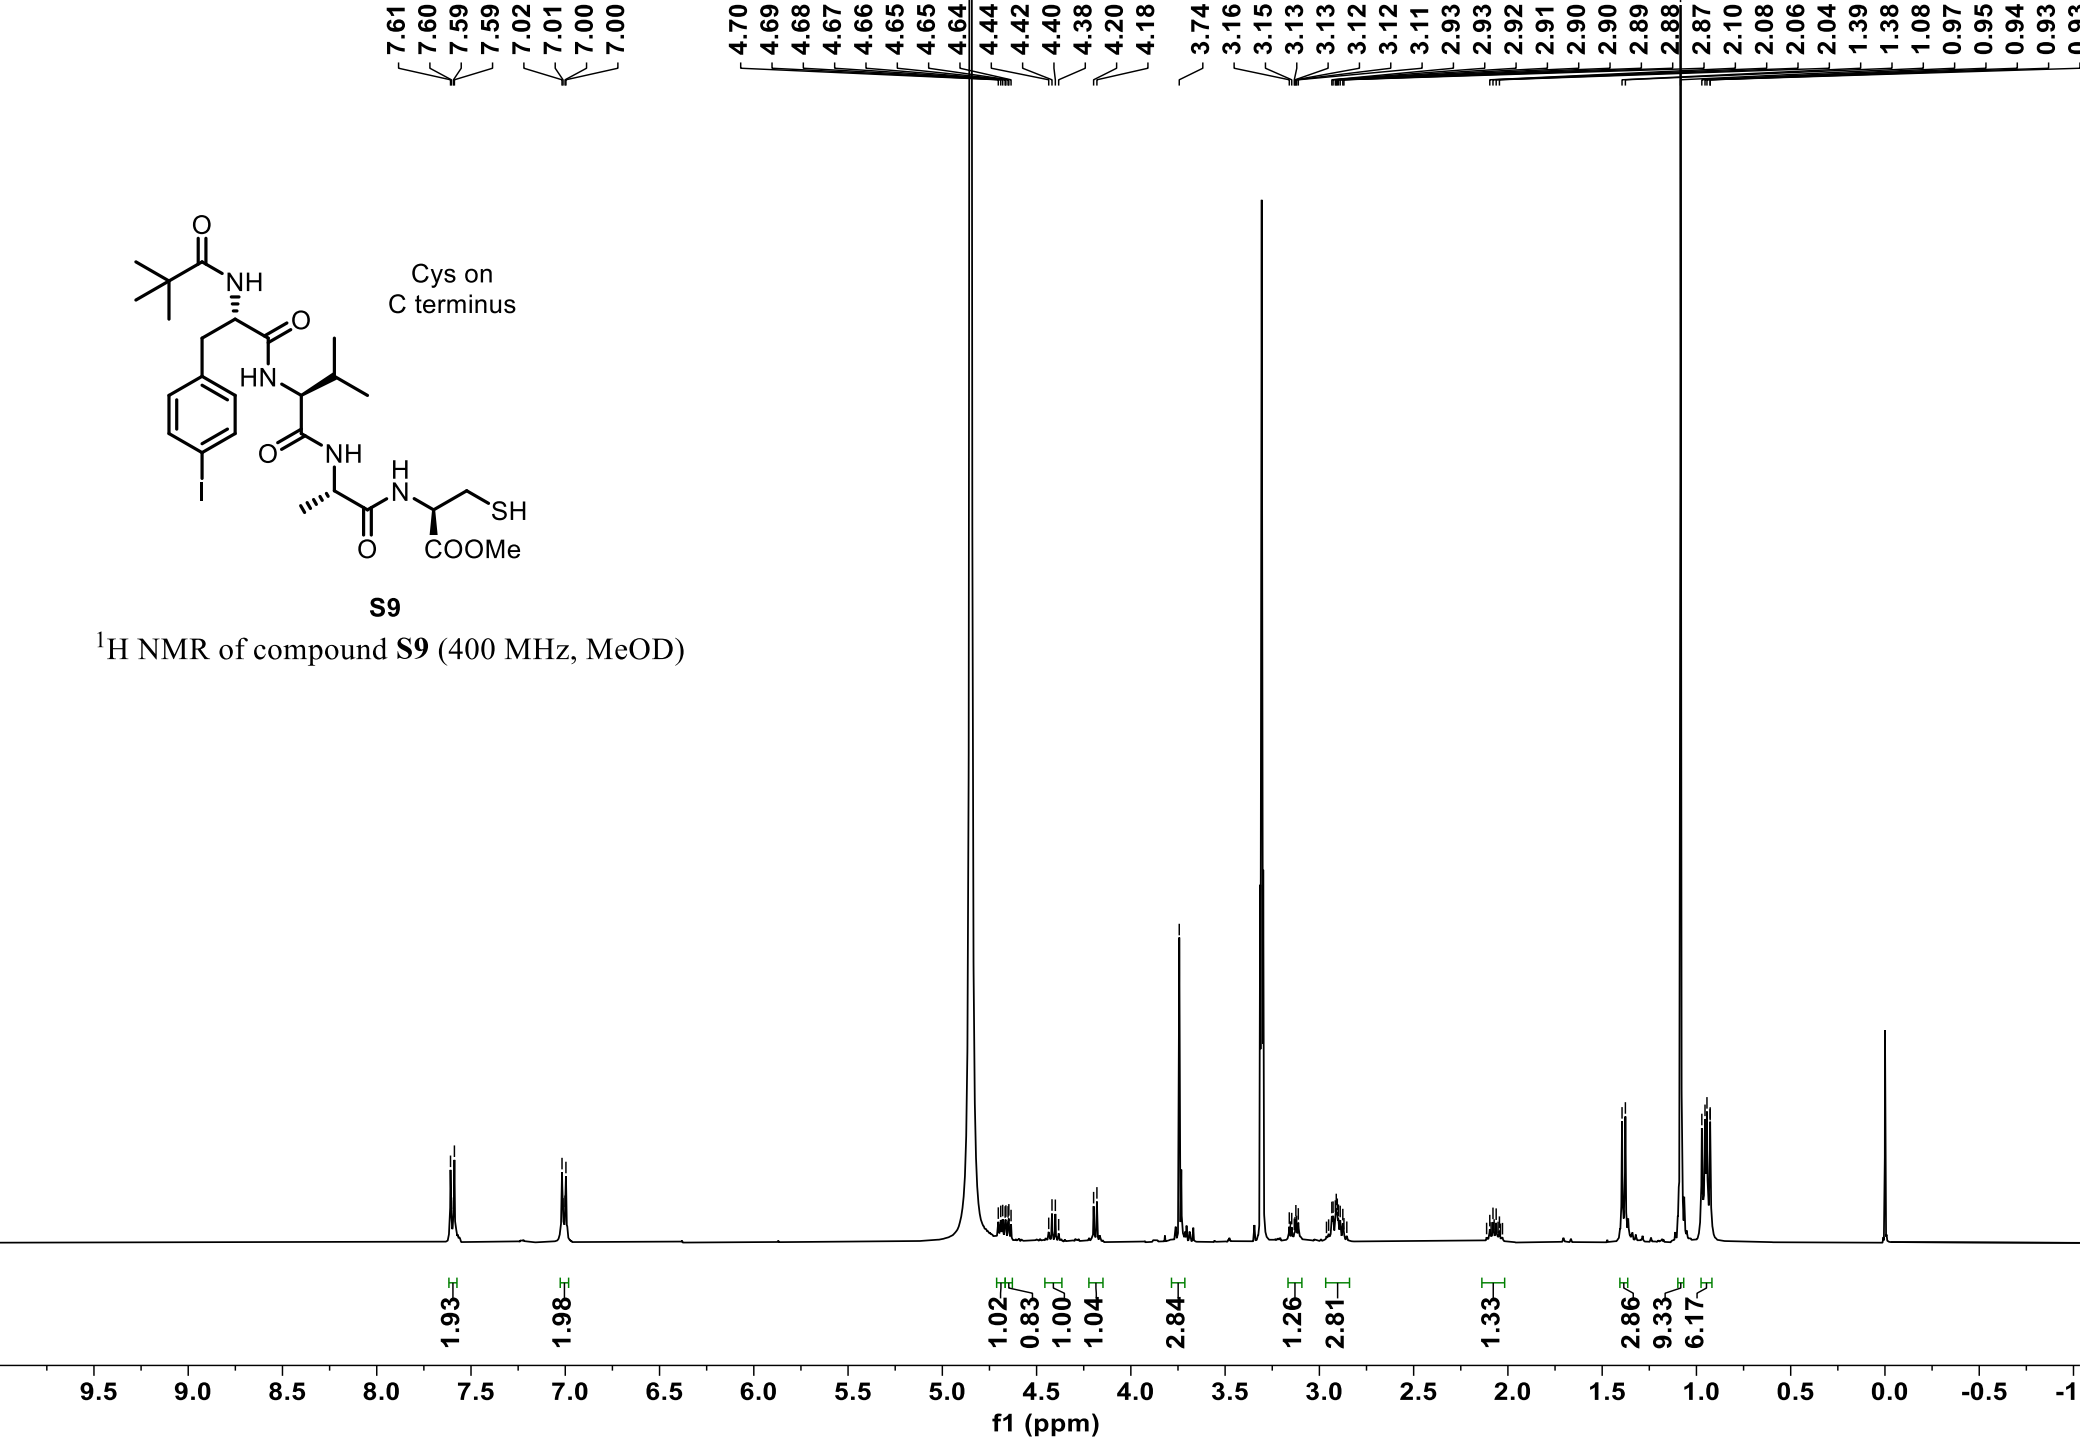

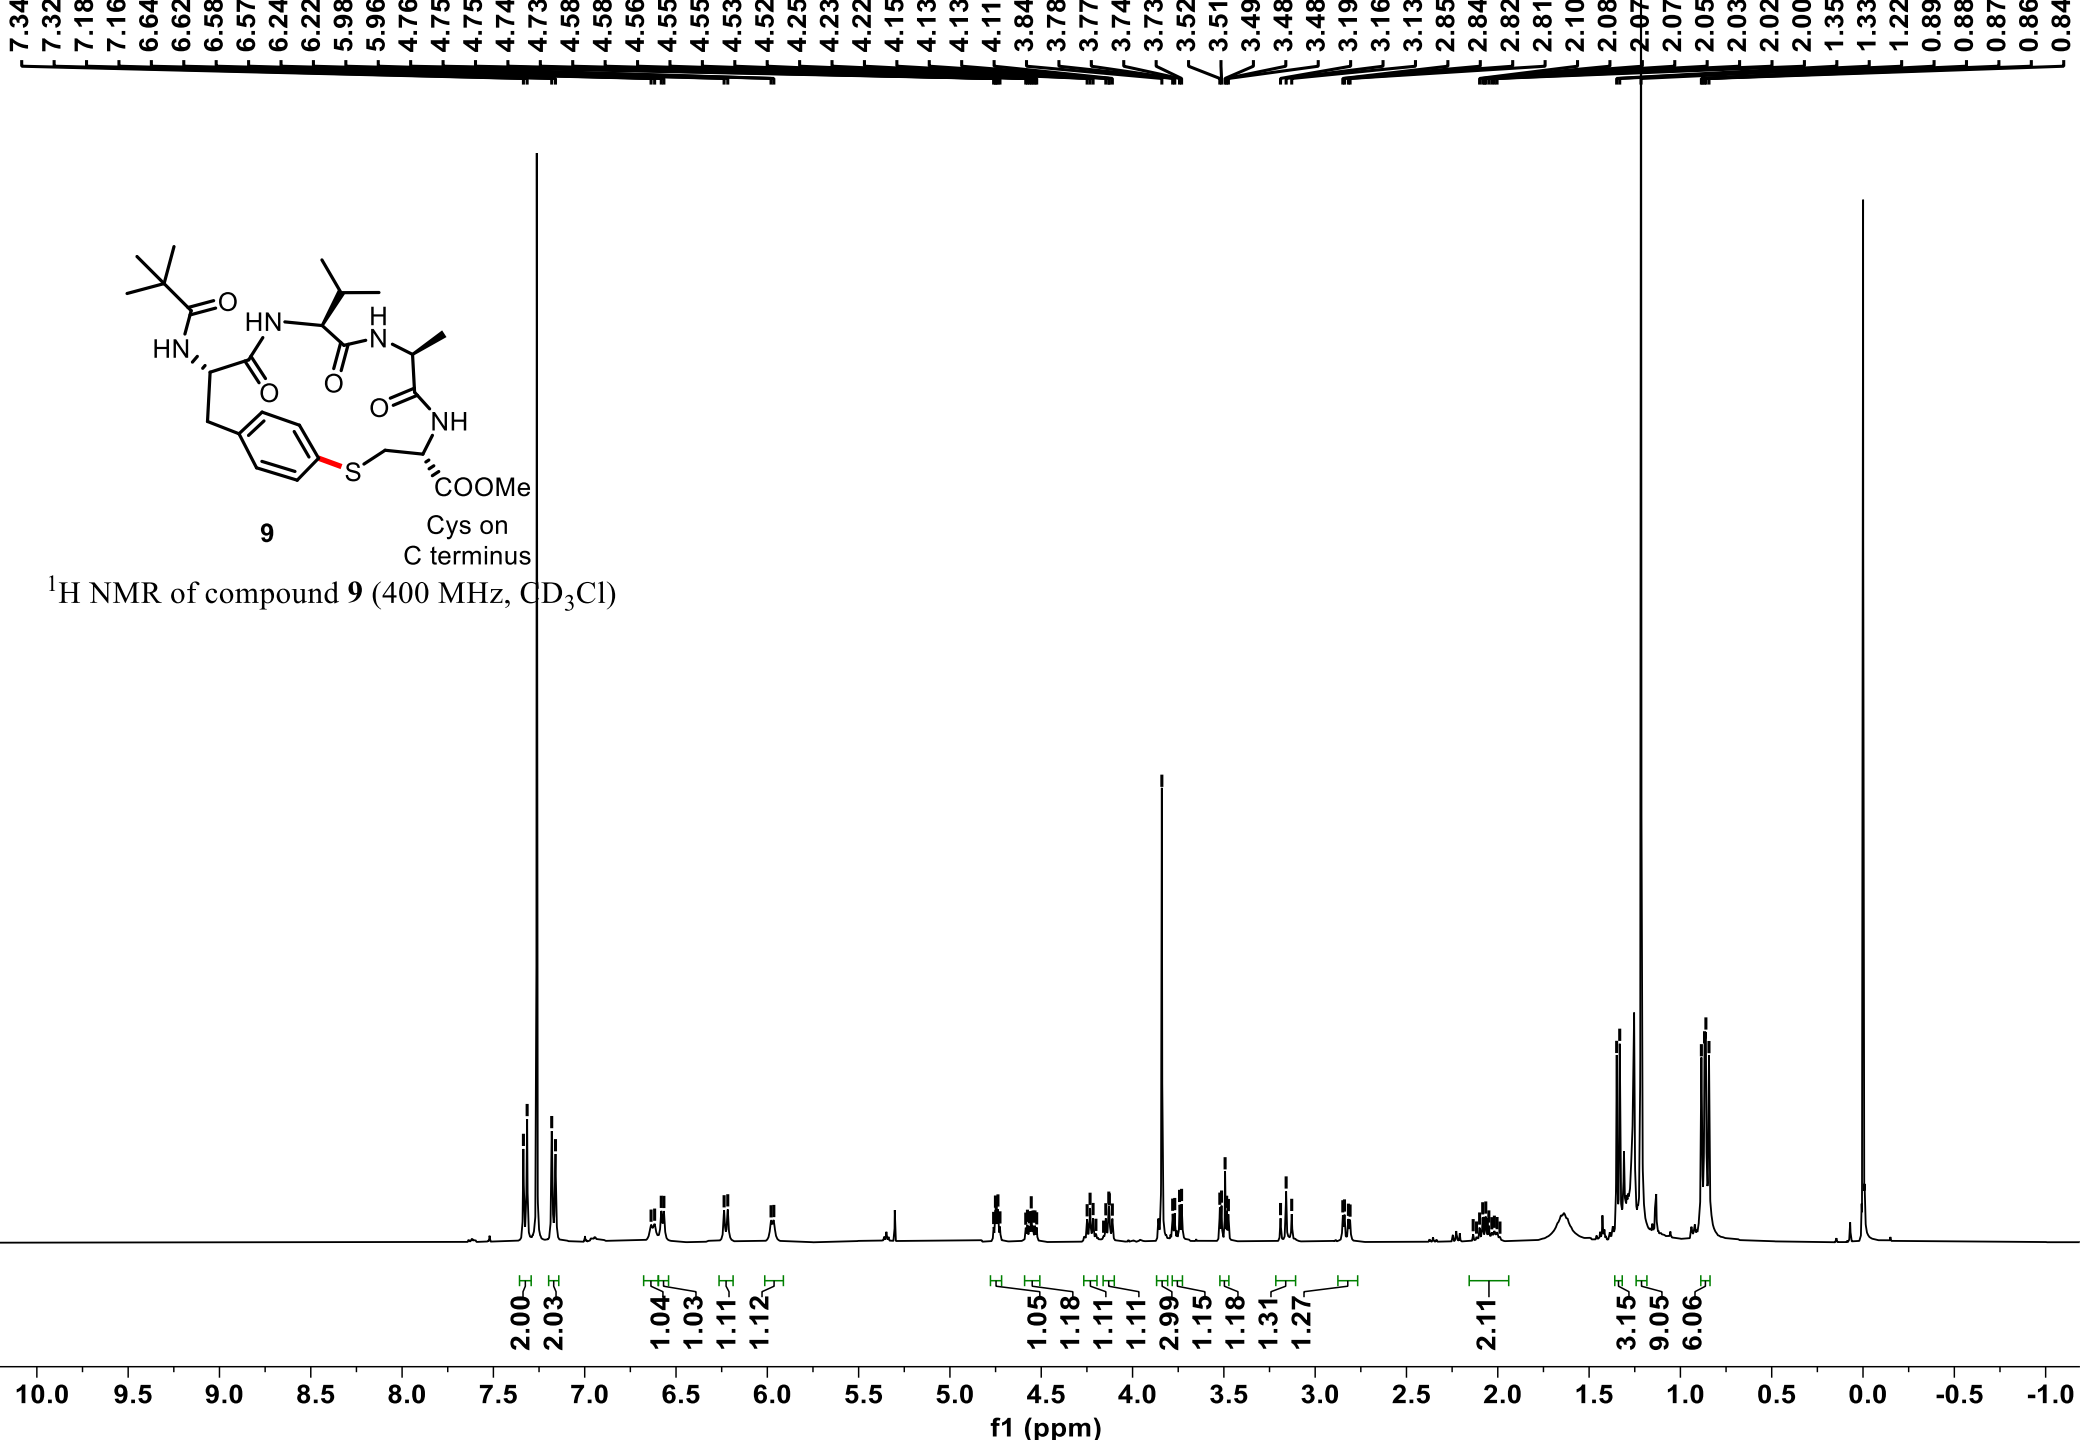

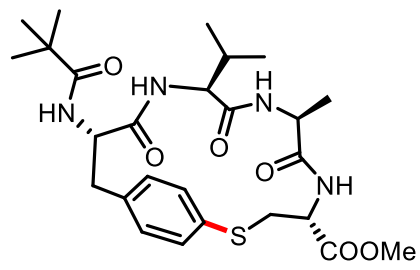

9

Cys on  
C terminus

$^{13}\text{C}$  NMR of compound **9** (101 MHz, DMSO)

177.54  
171.85  
171.01  
170.87  
170.55

136.77  
133.97  
131.81  
130.35  
130.12

59.95  
55.15  
54.11  
52.90  
48.79  
38.47  
31.74  
30.58  
27.70  
27.02  
22.54  
19.43  
18.76

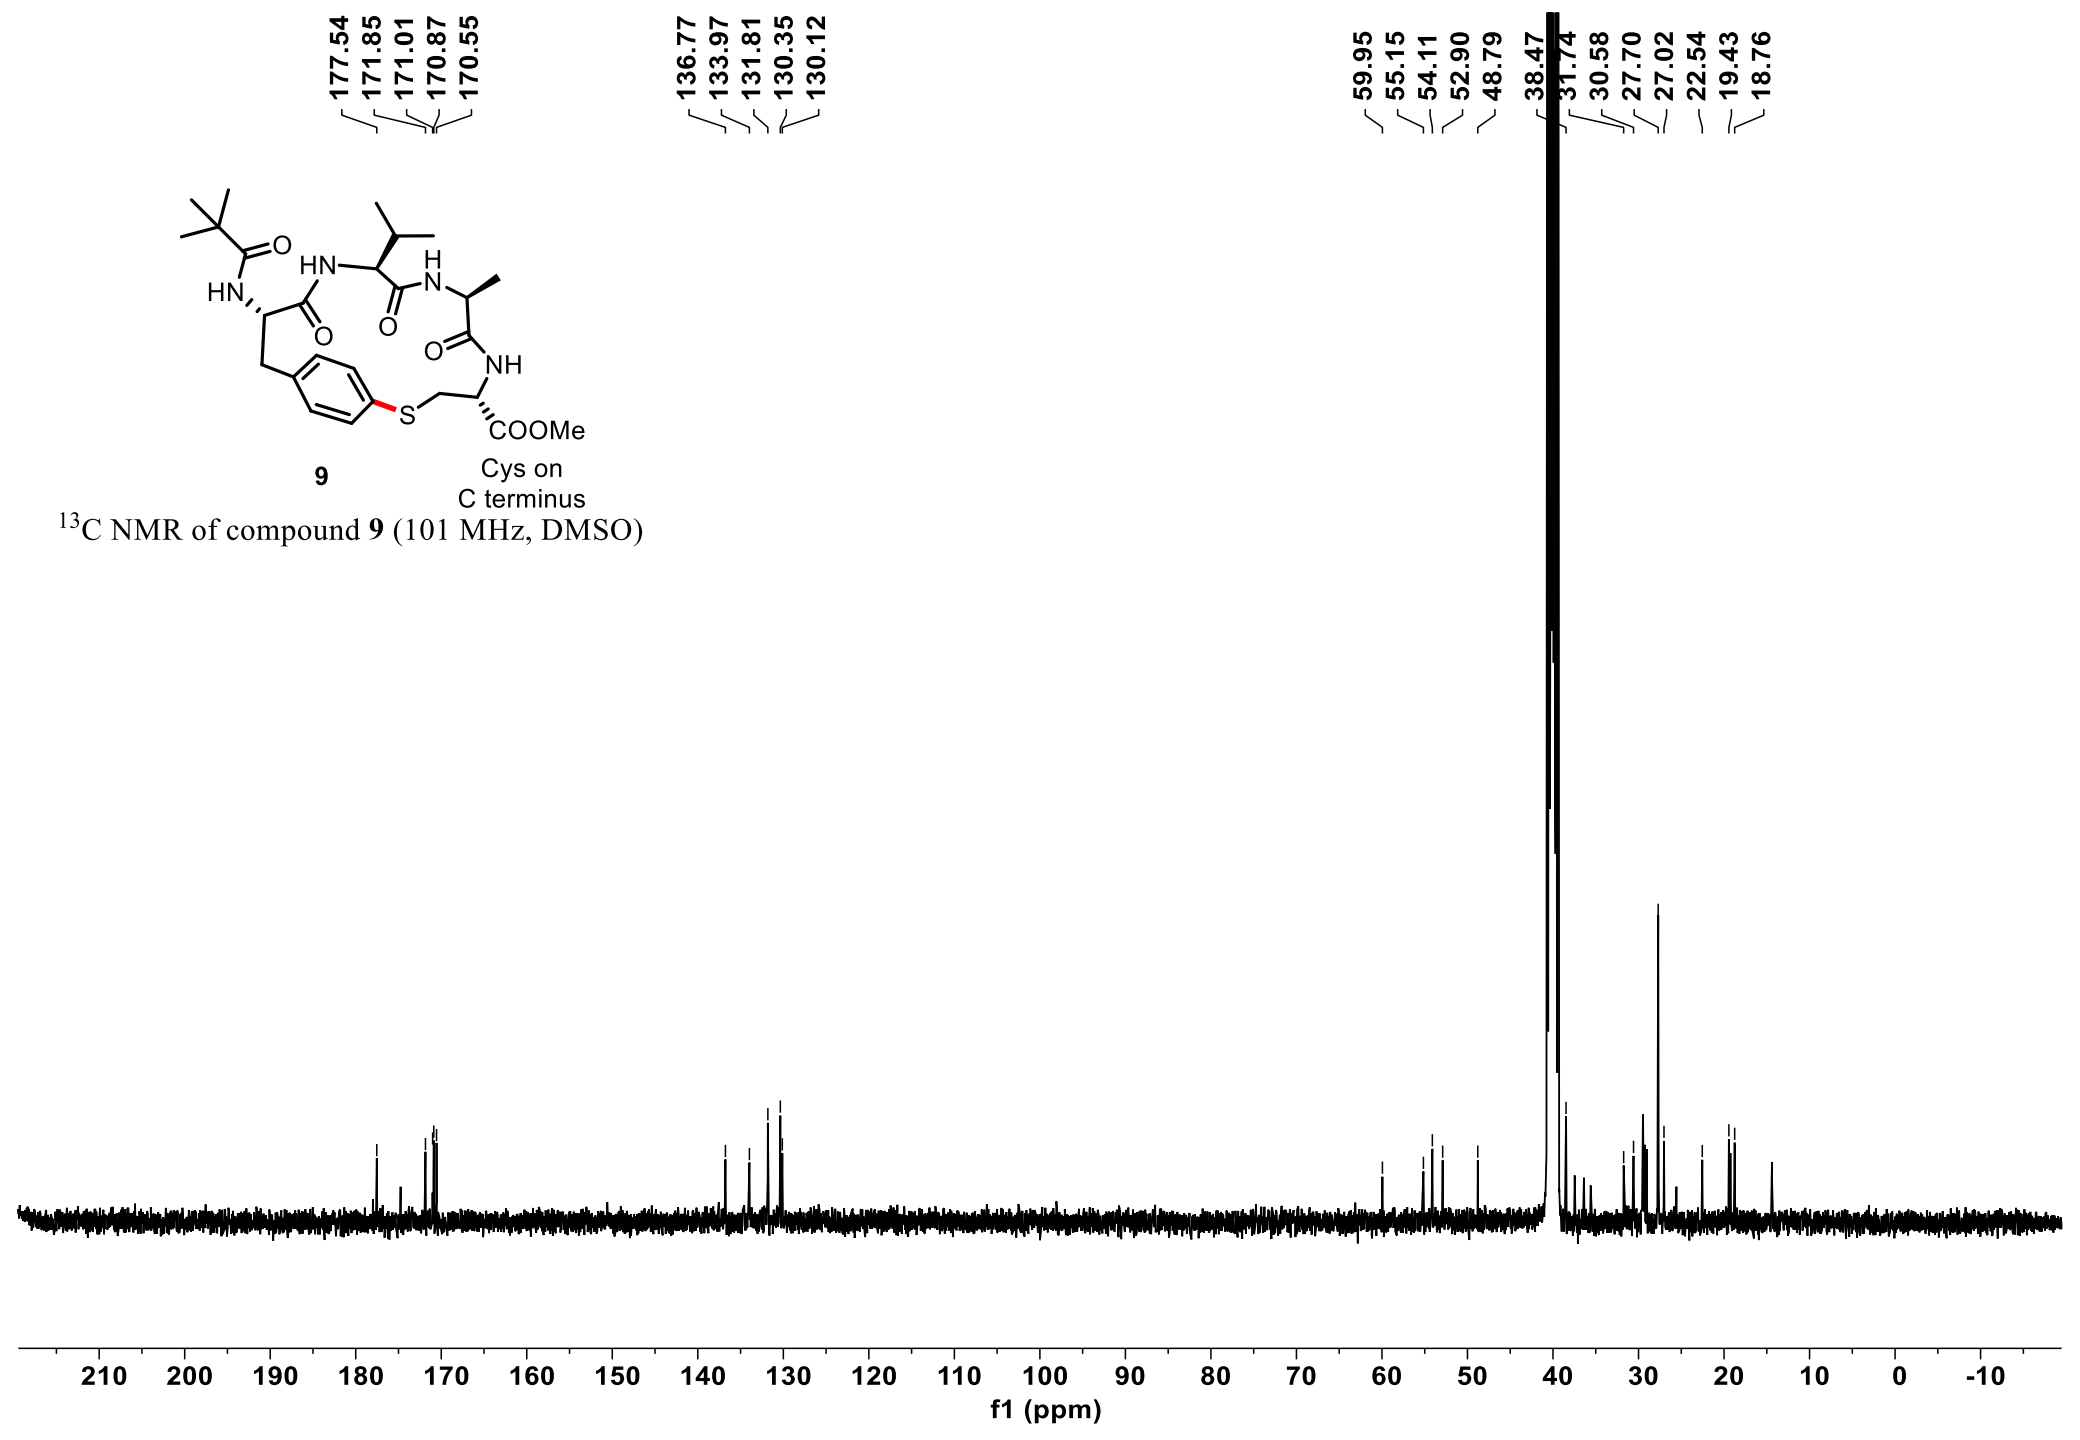

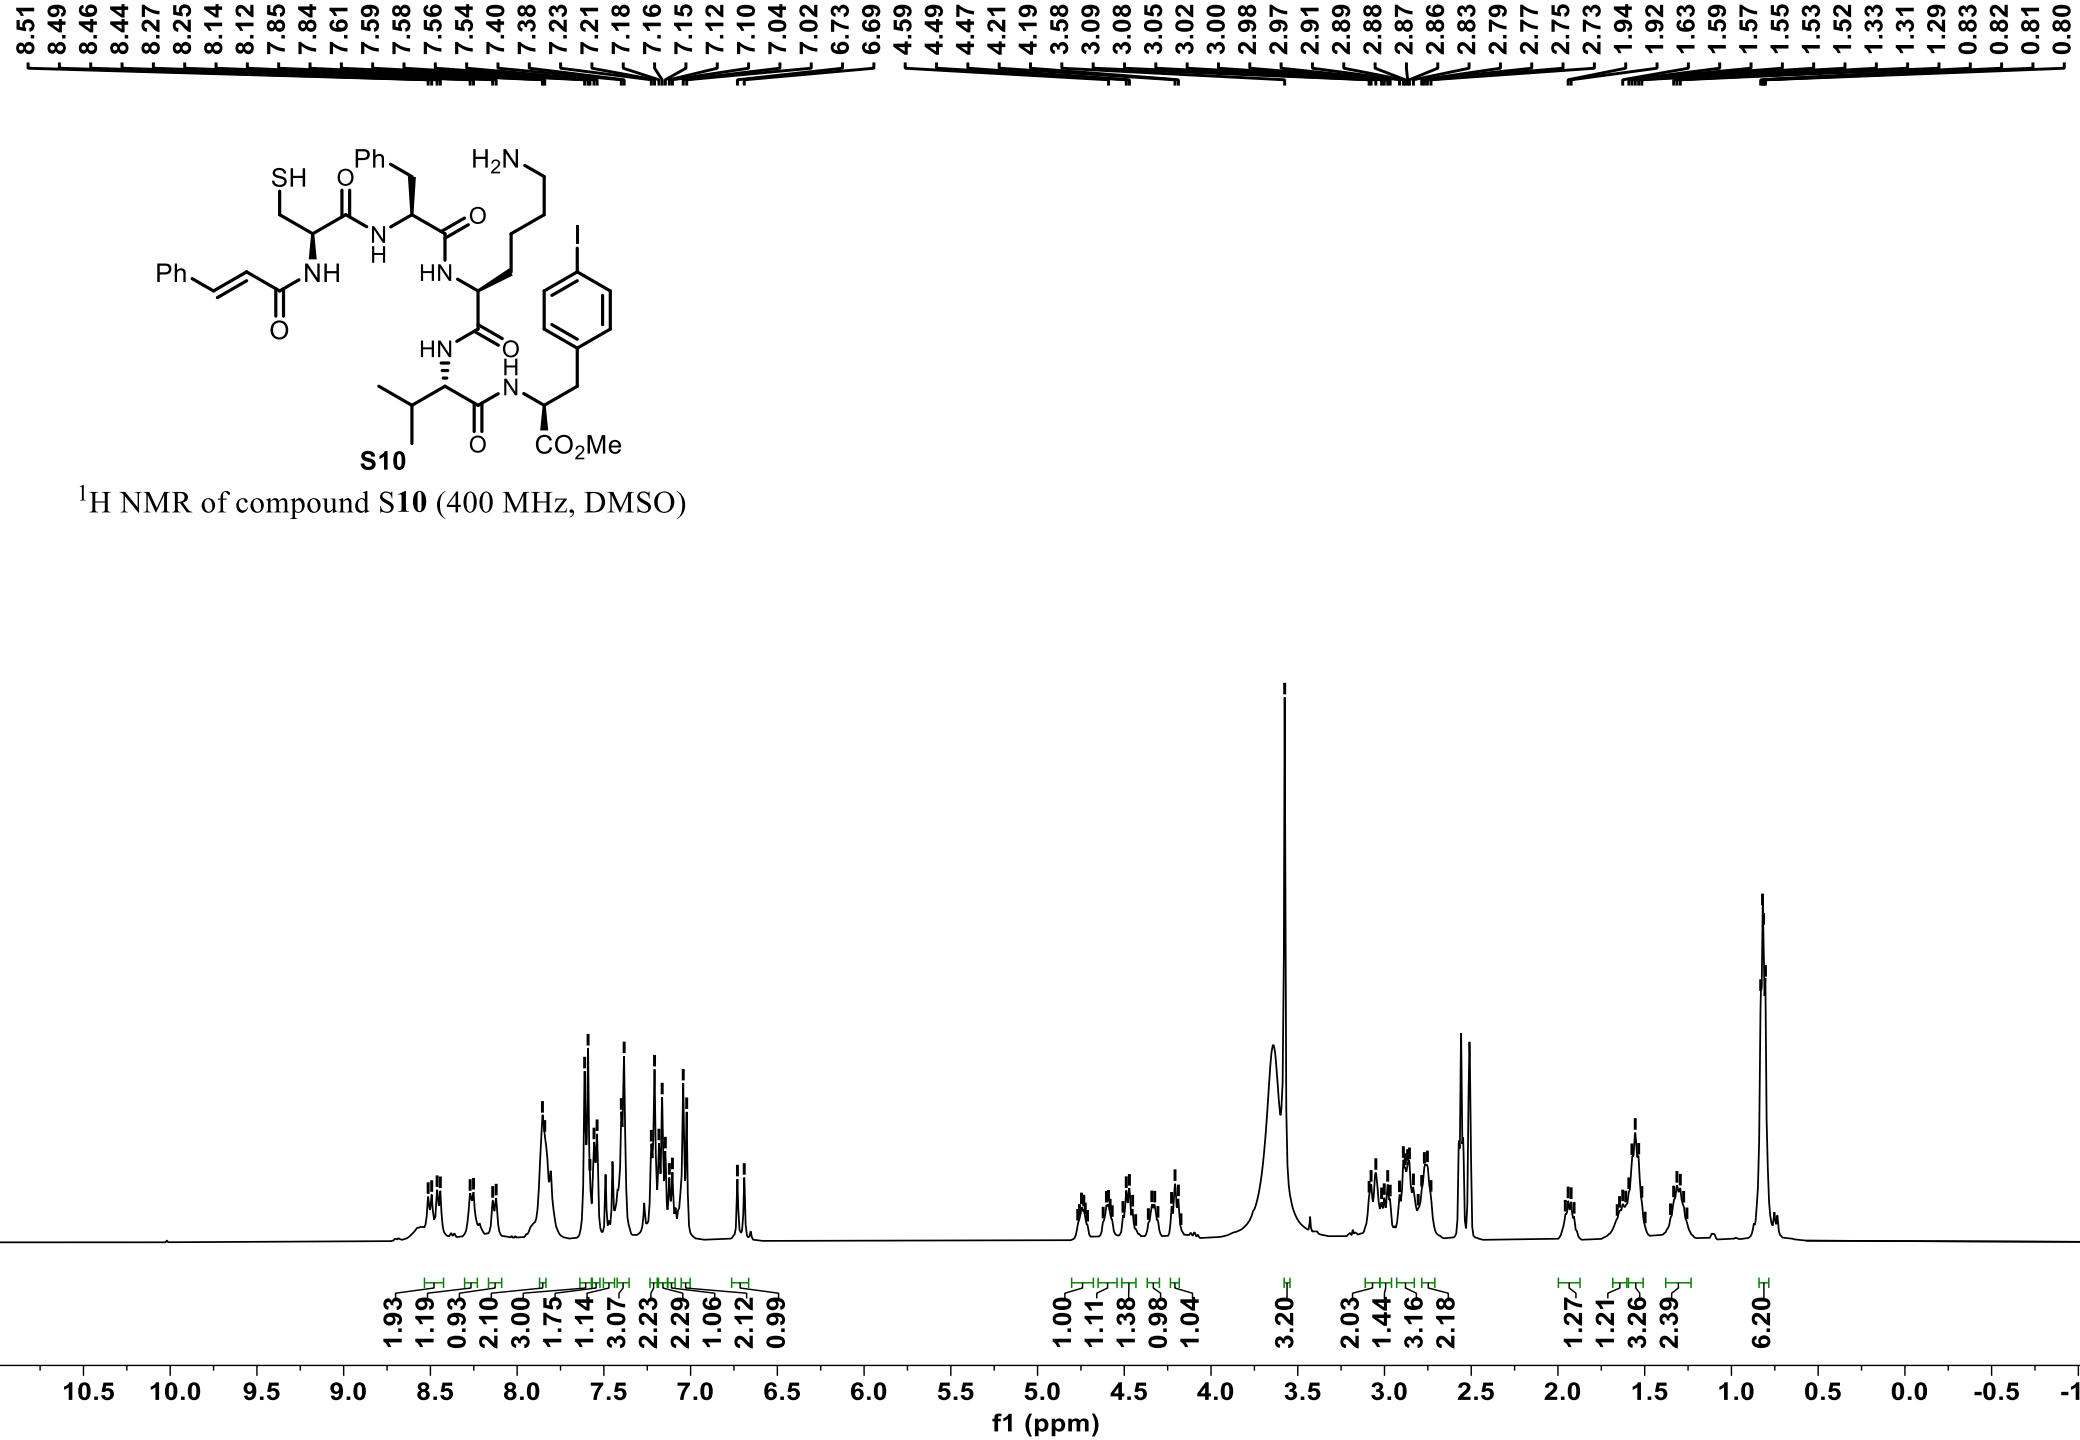

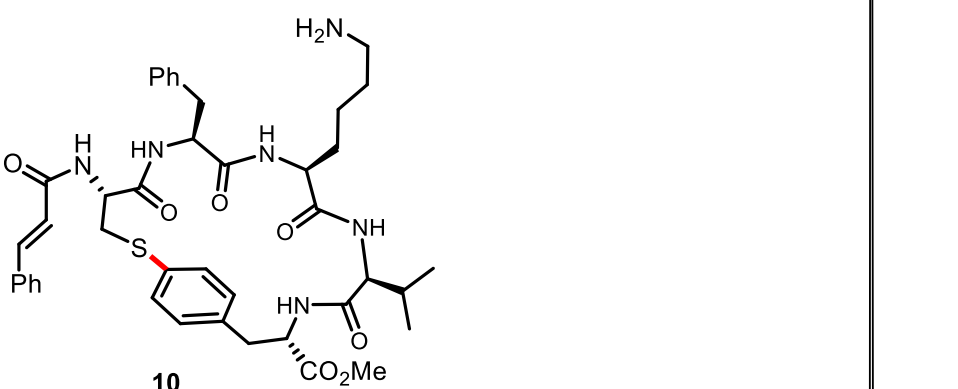

<sup>1</sup>H NMR of compound **10** (400 MHz, MeOD)

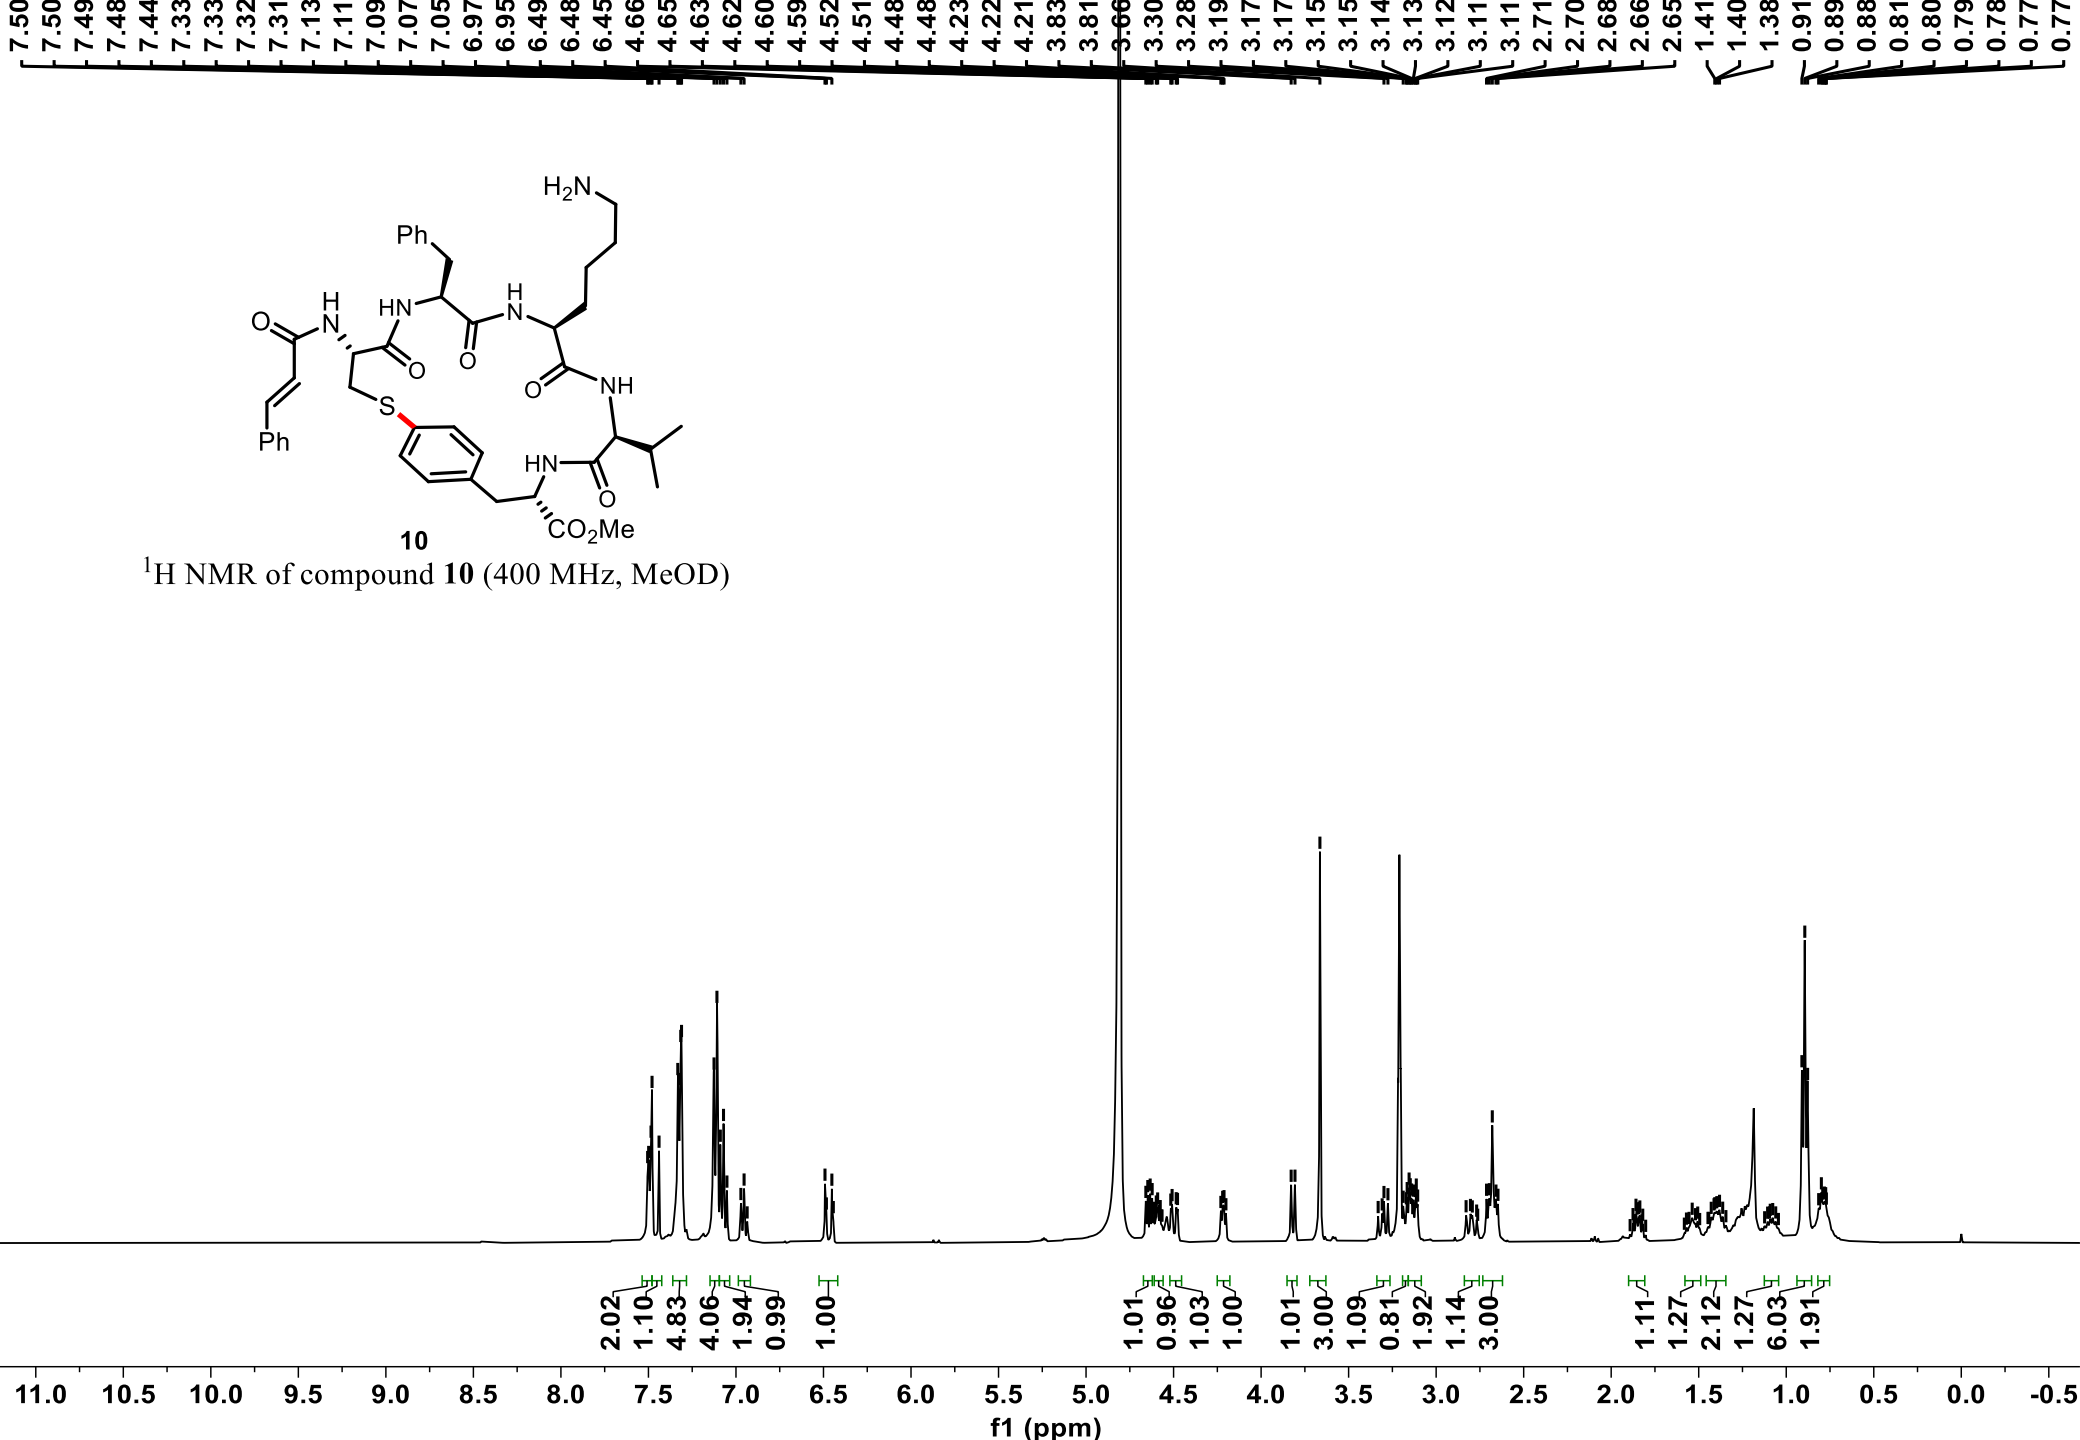

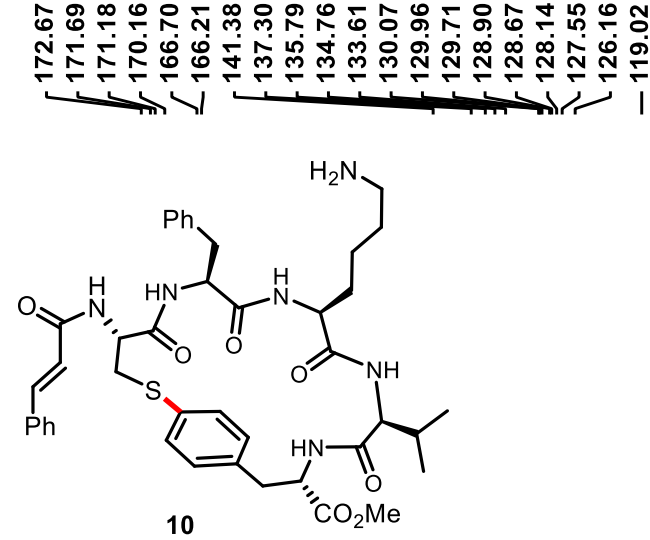

<sup>13</sup>C NMR of compound **10** (101 MHz, MeOD)

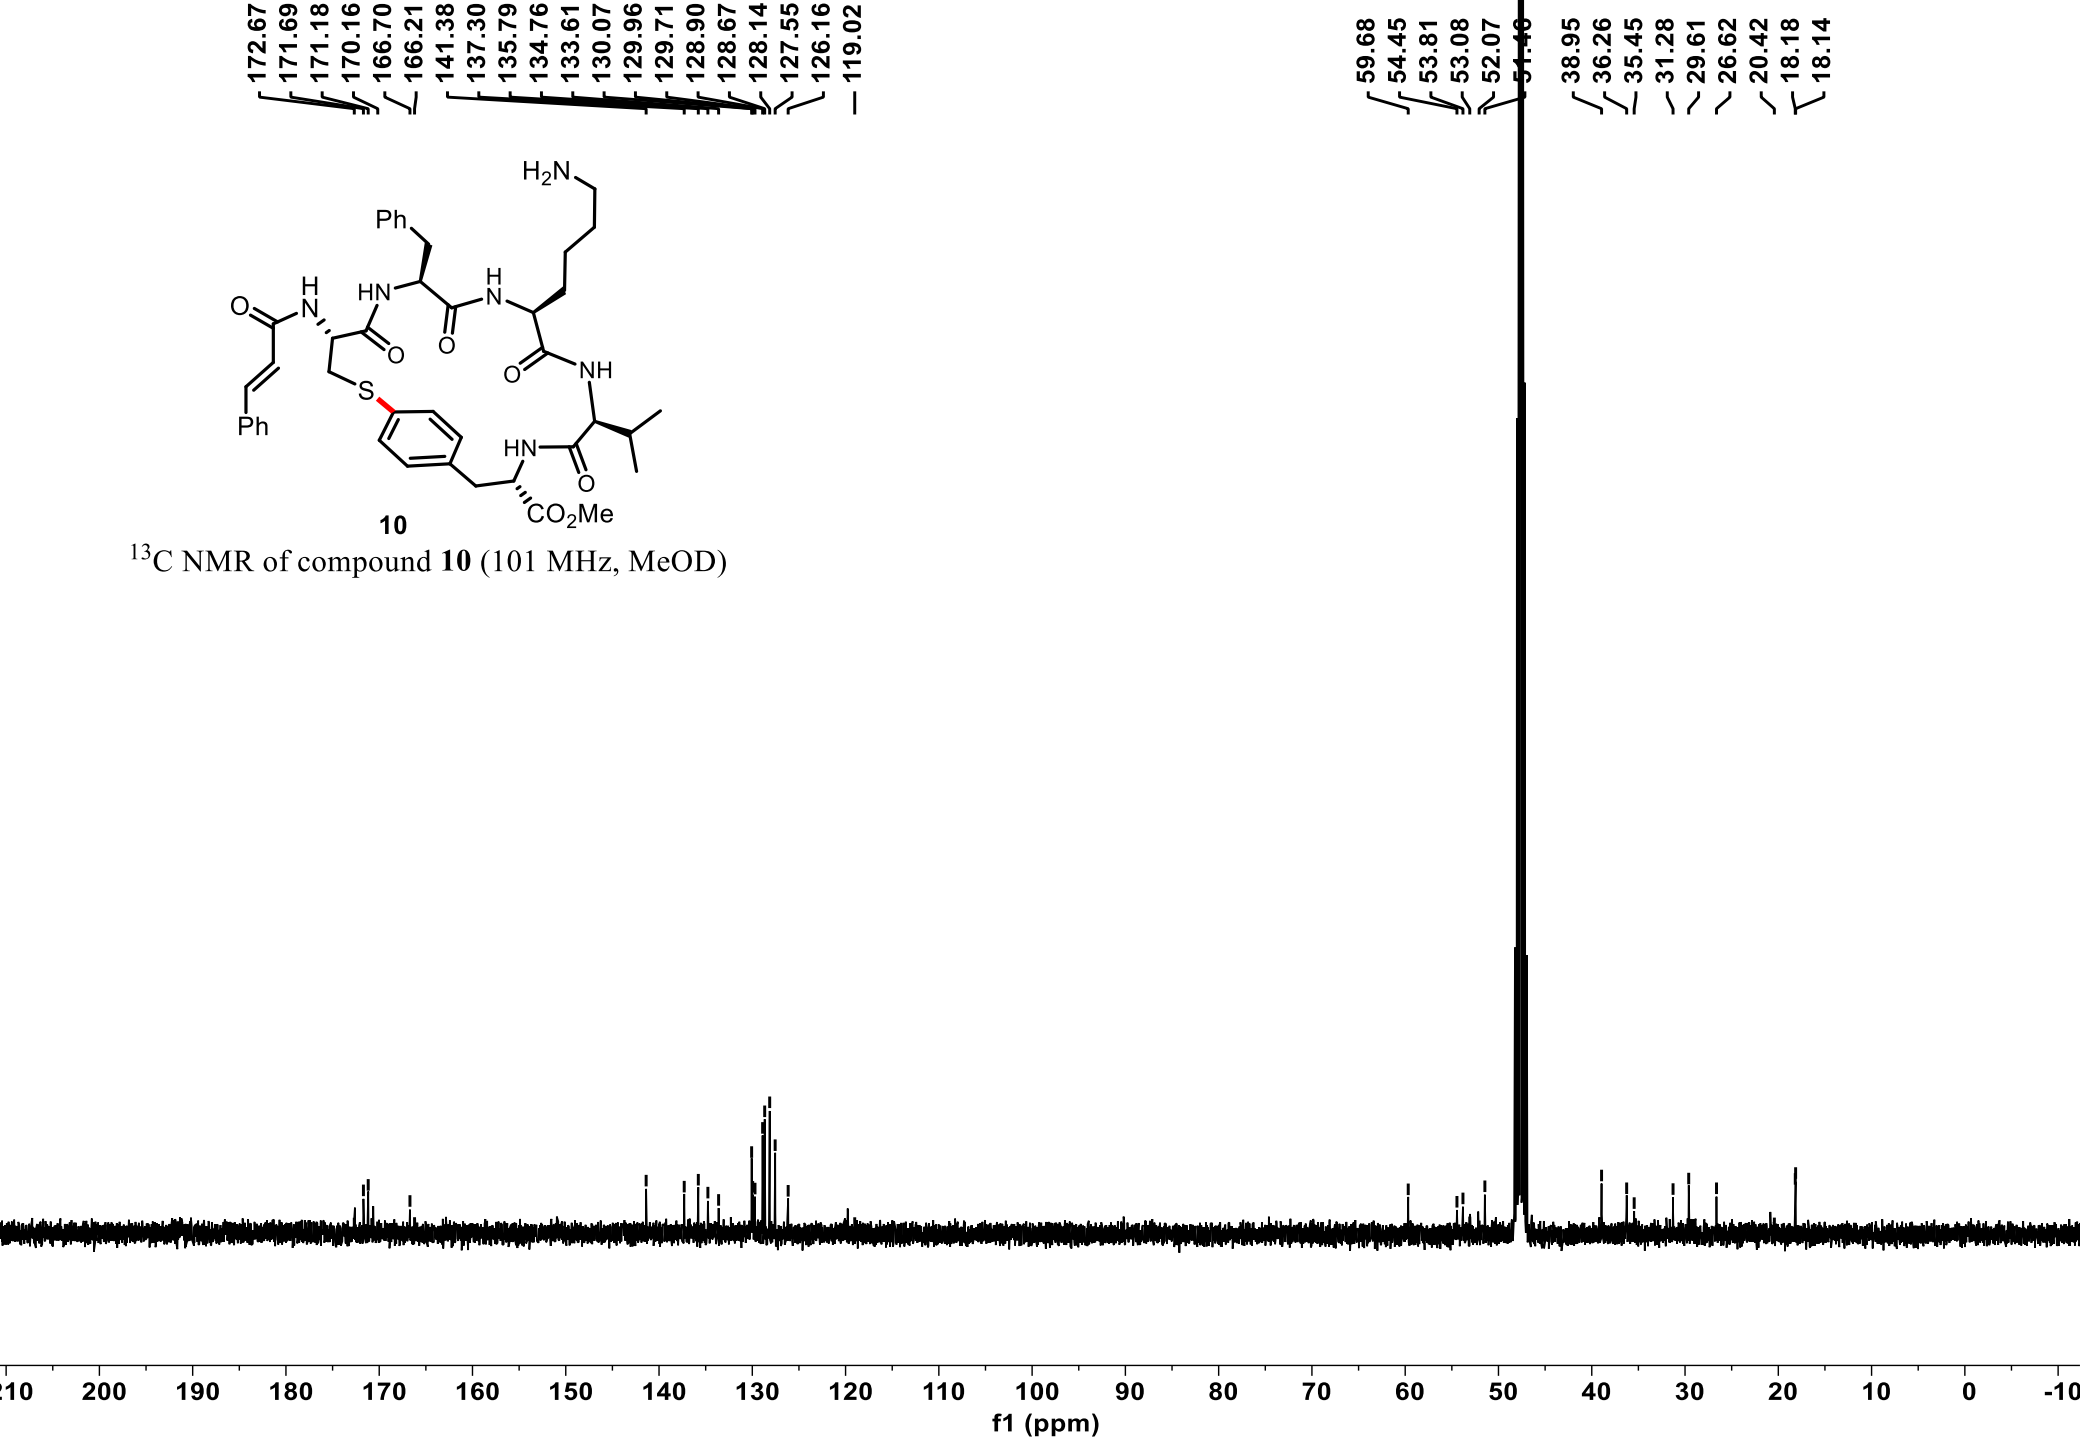

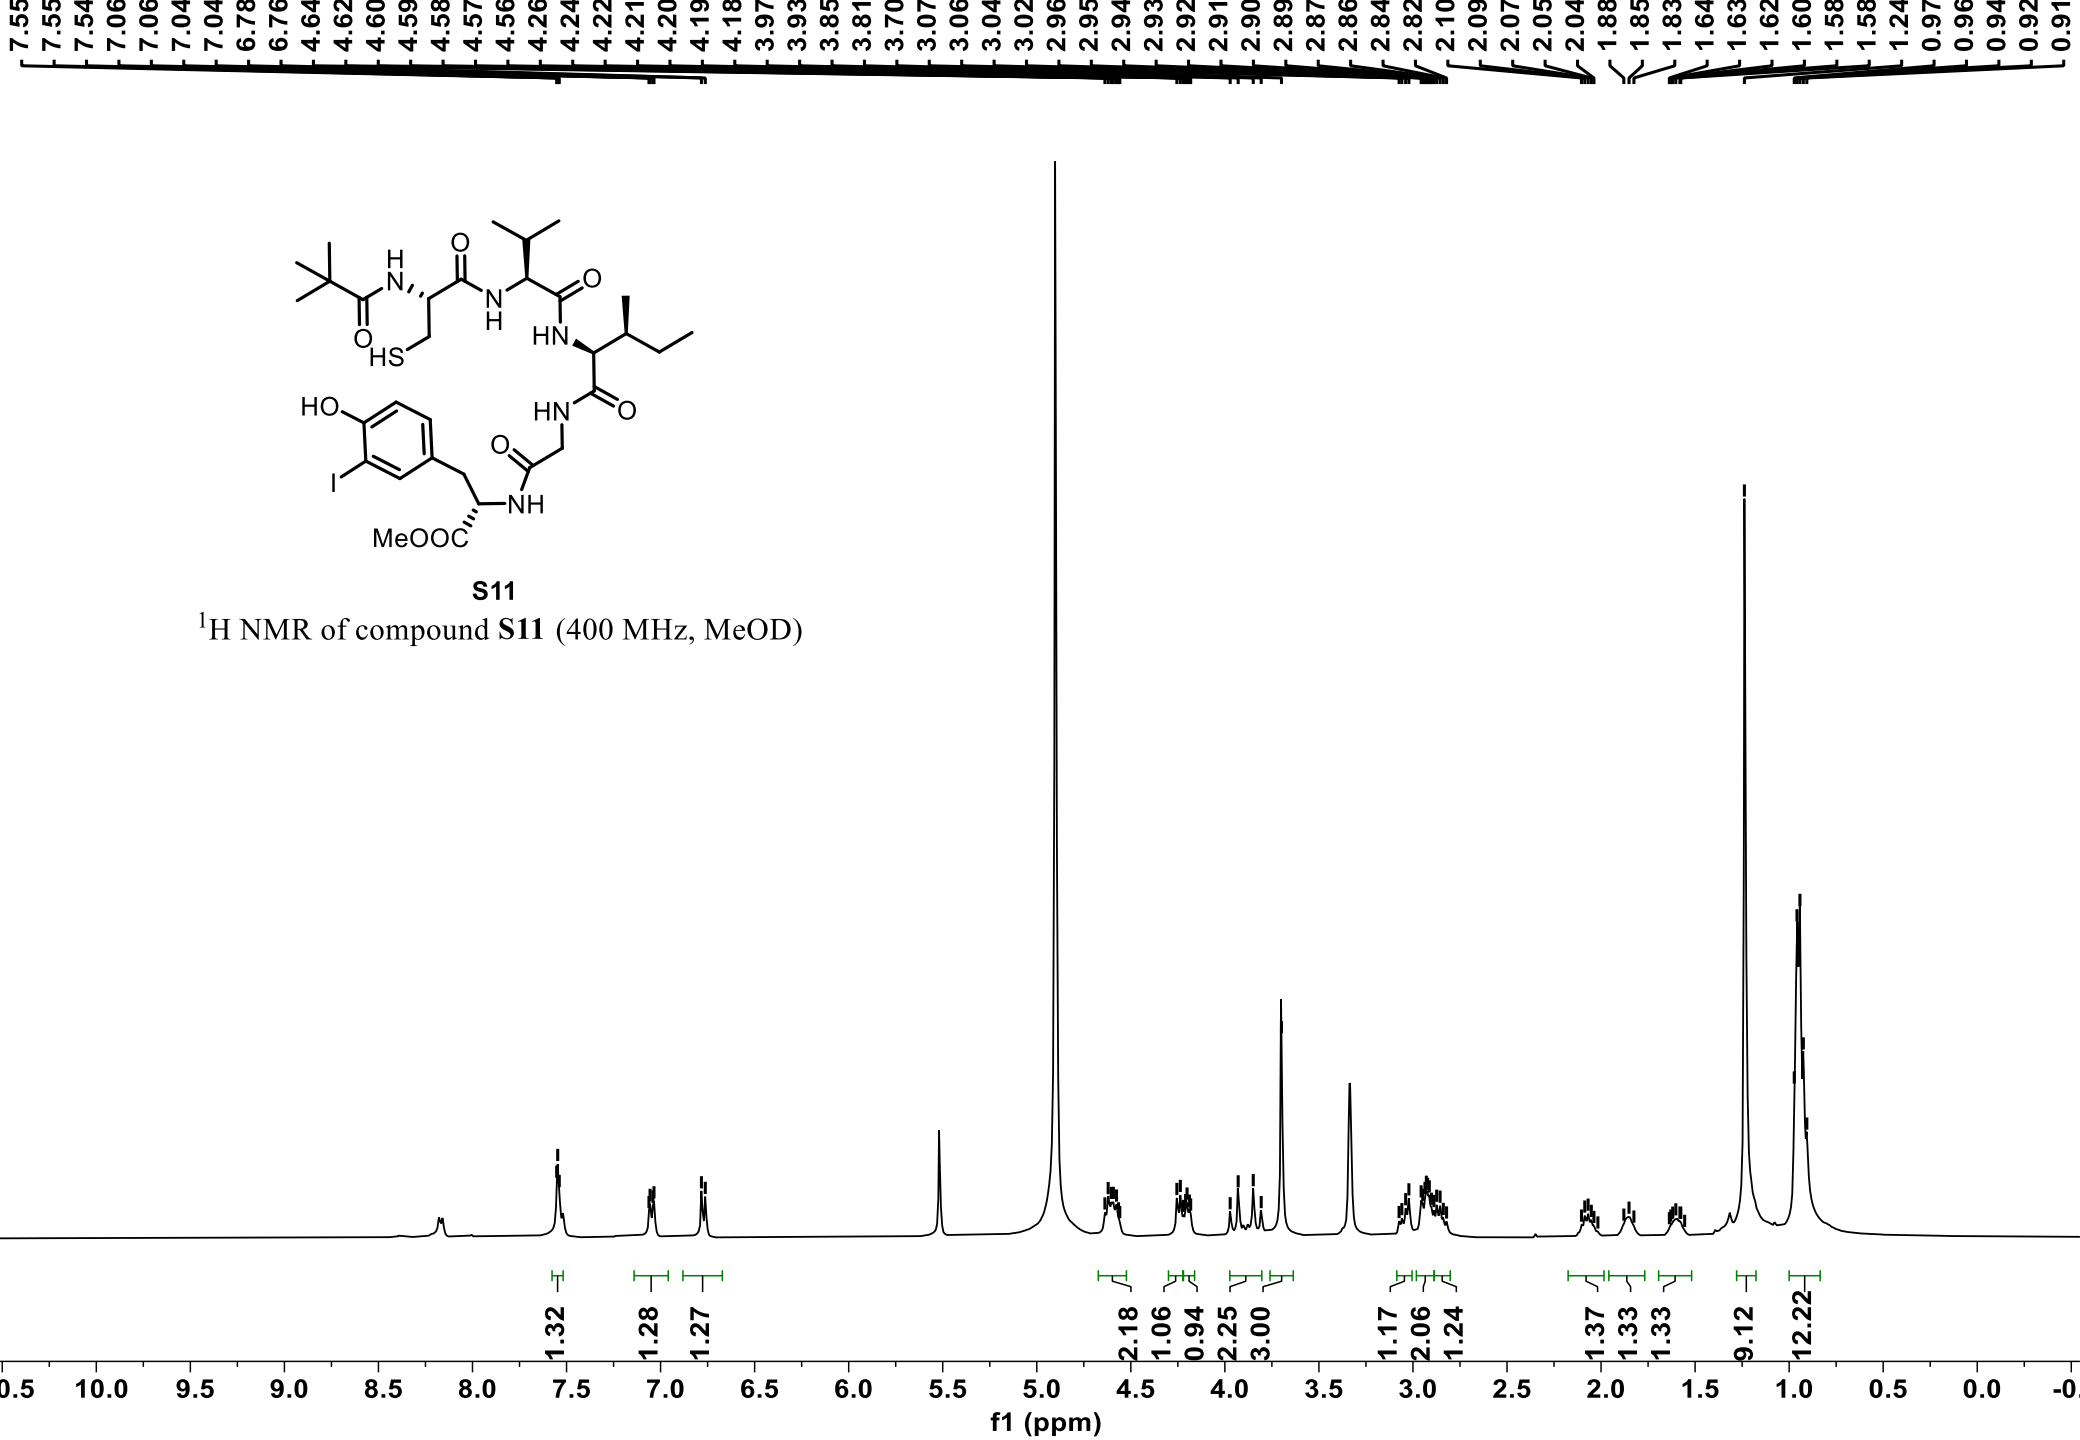

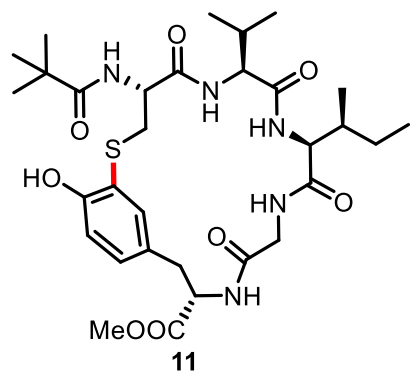

$^1\text{H}$  NMR of compound **11** (400 MHz, MeOD)

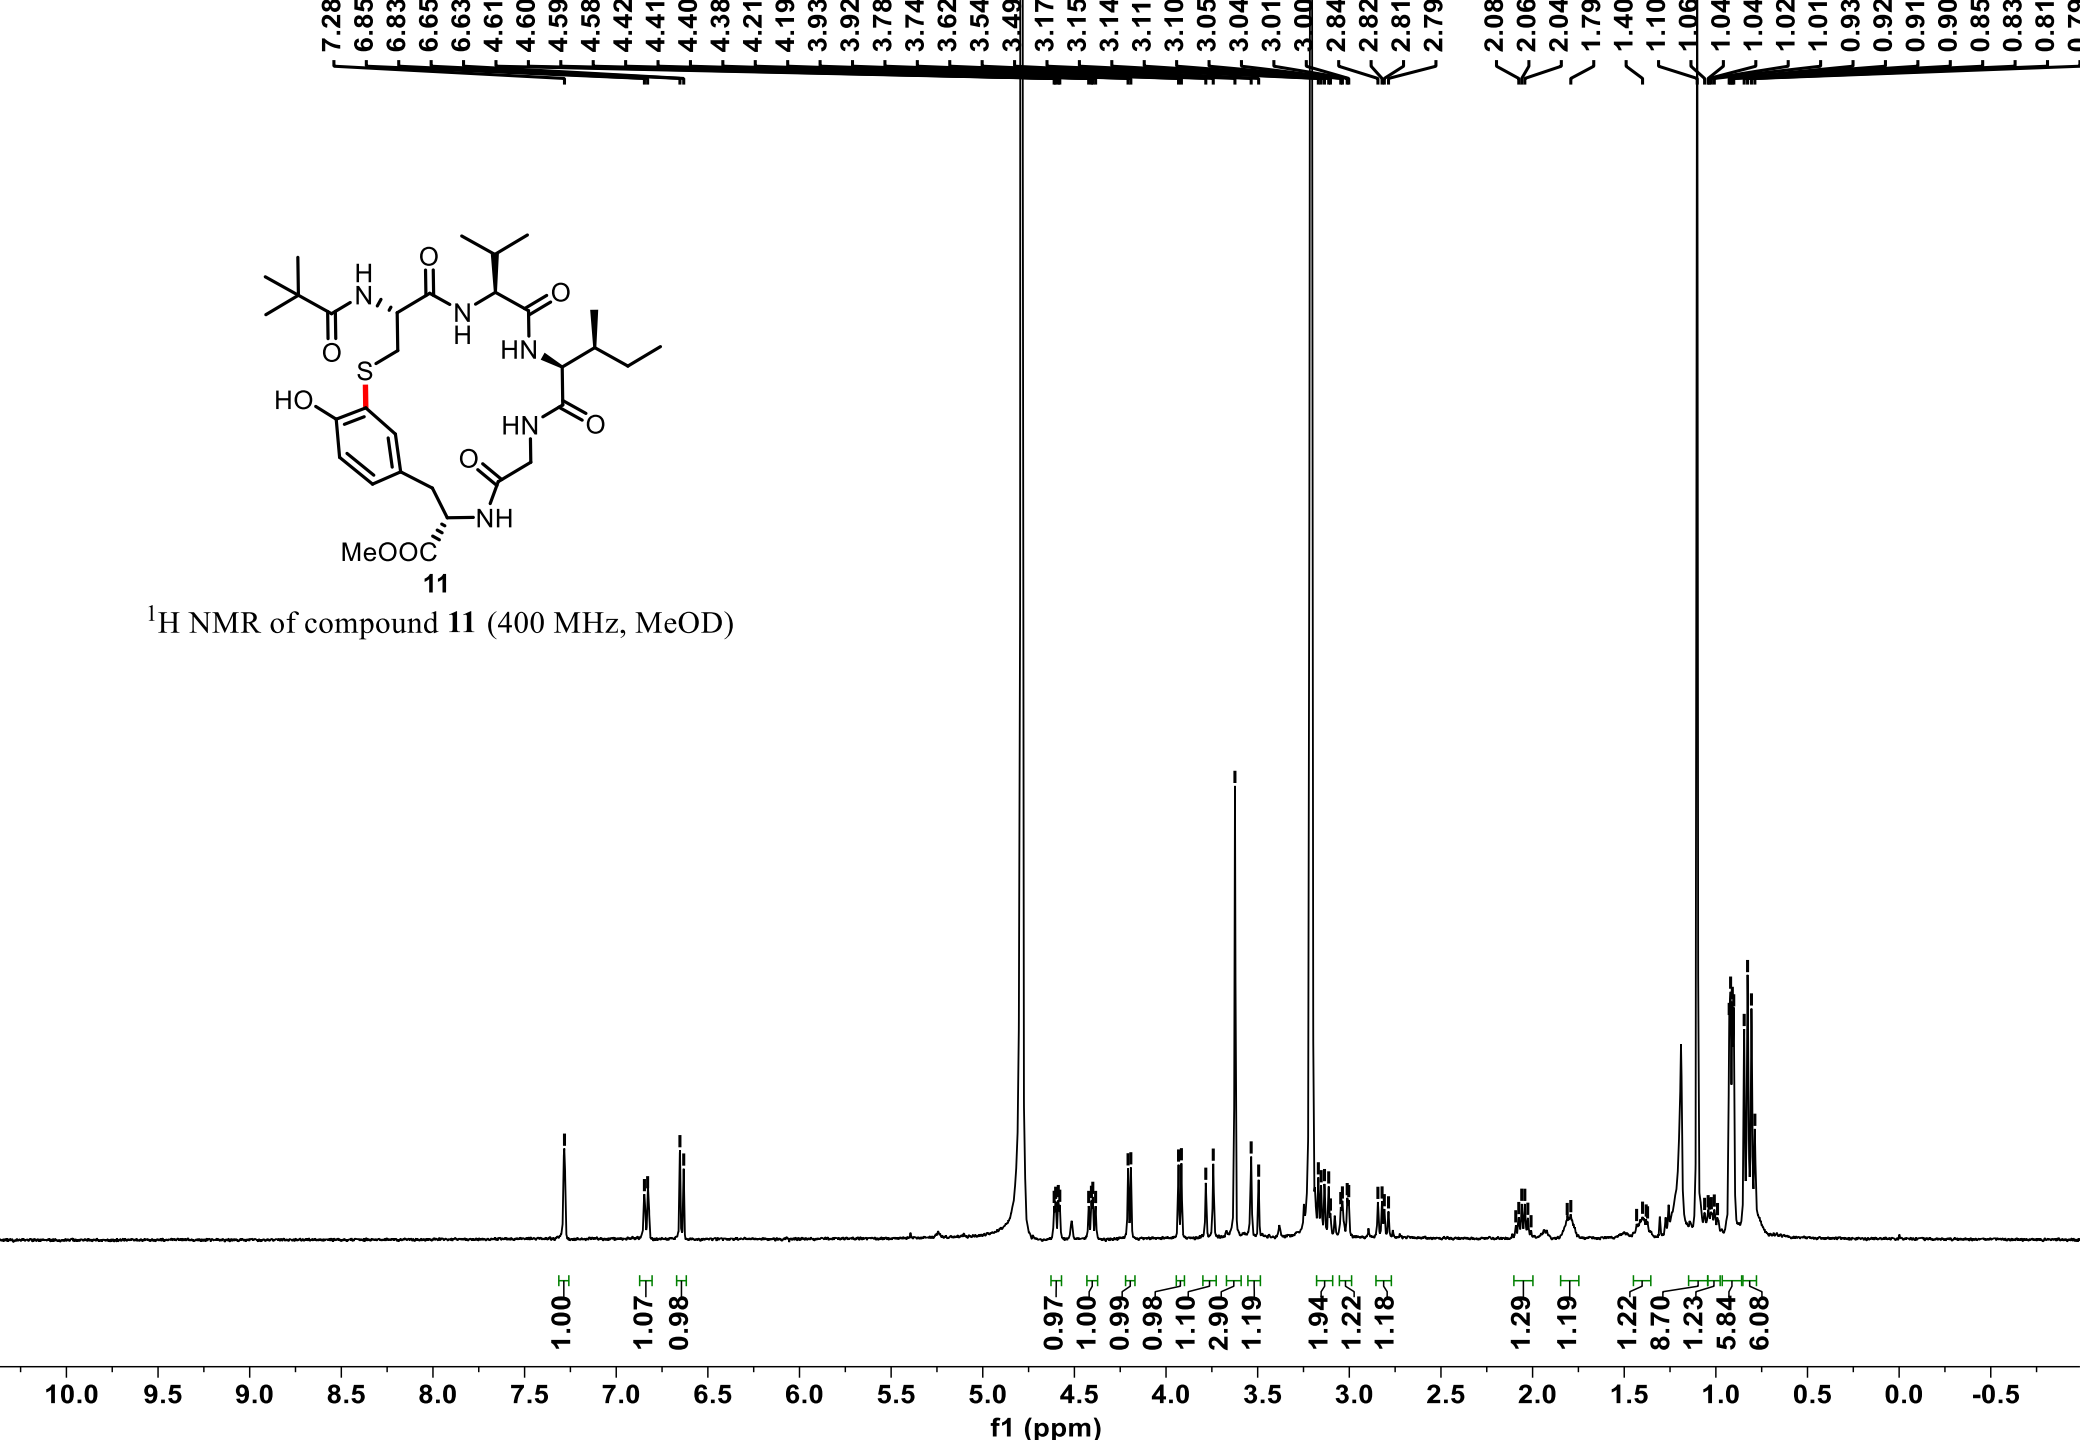



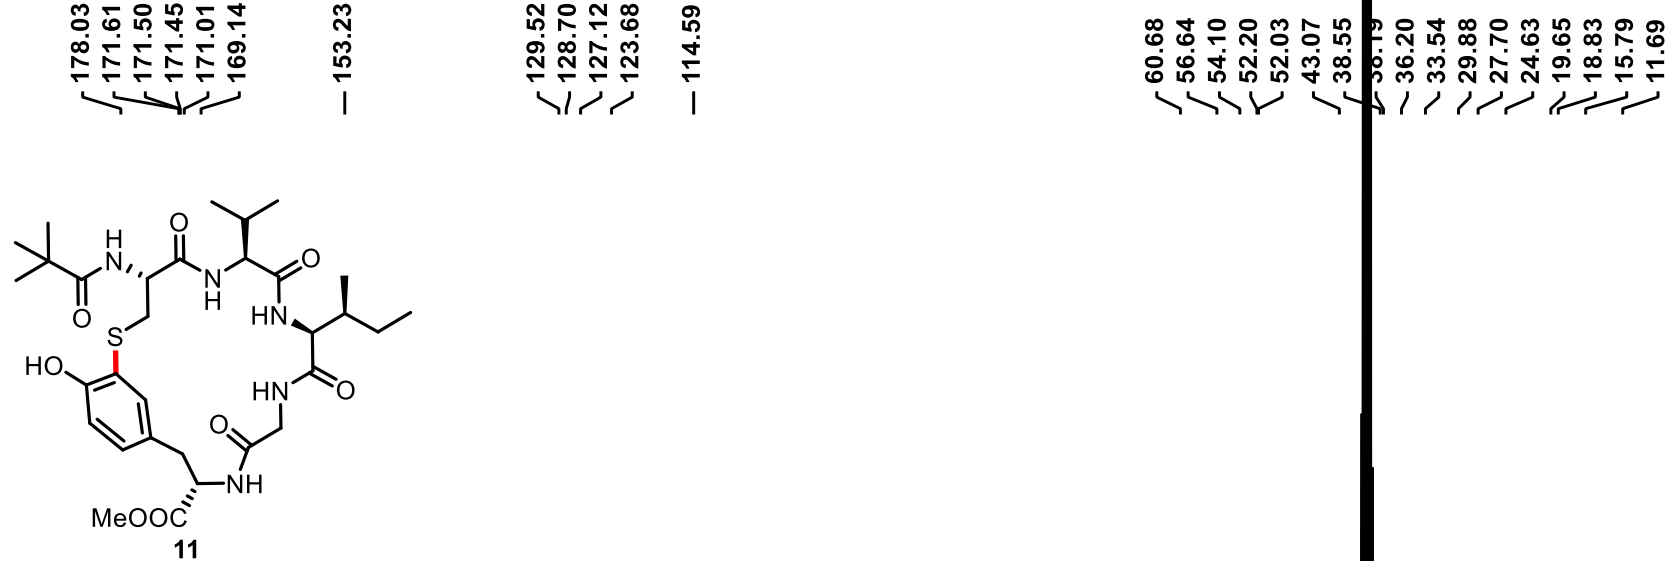

<sup>13</sup>C NMR of compound **11** (101 MHz, DMSO)

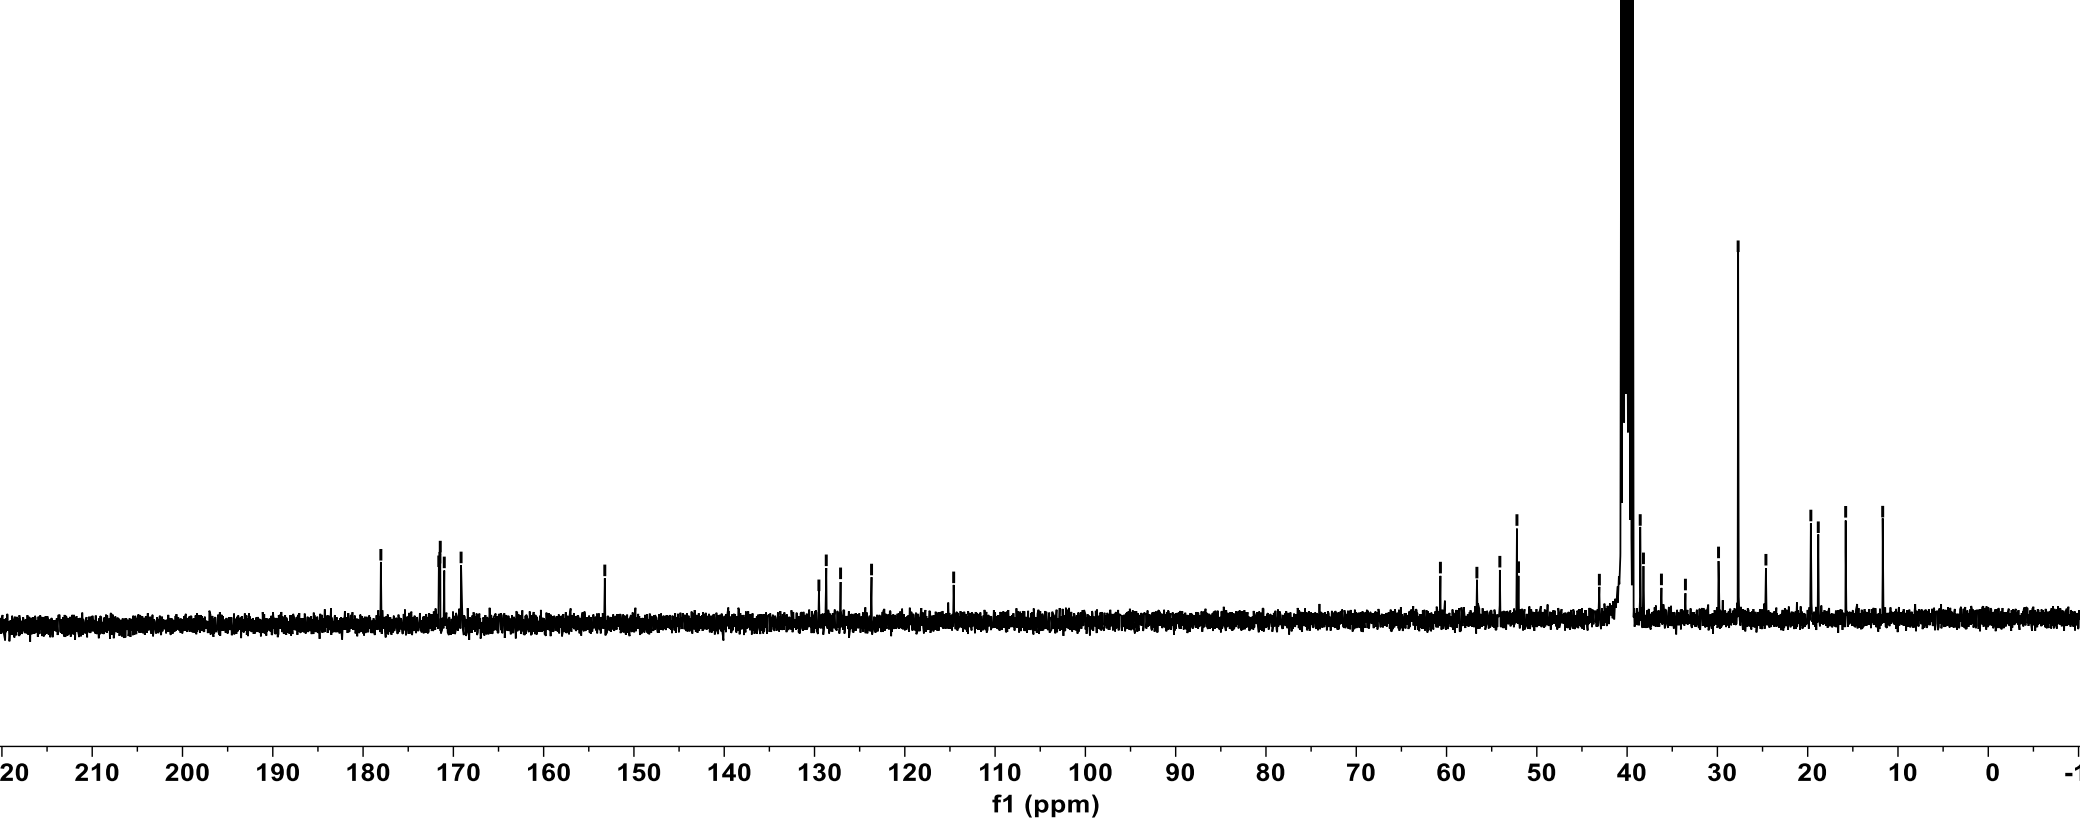

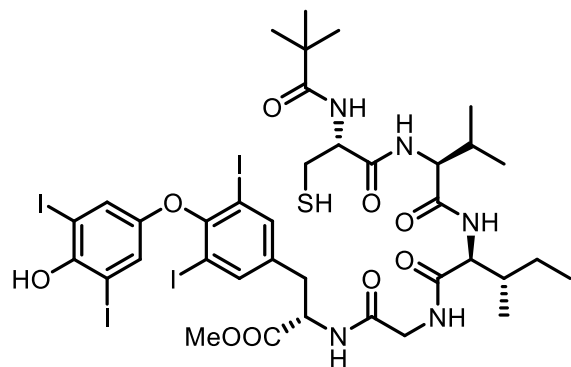

**S12**

$^1\text{H}$  NMR of compound **S12** (400 MHz, MeOD)

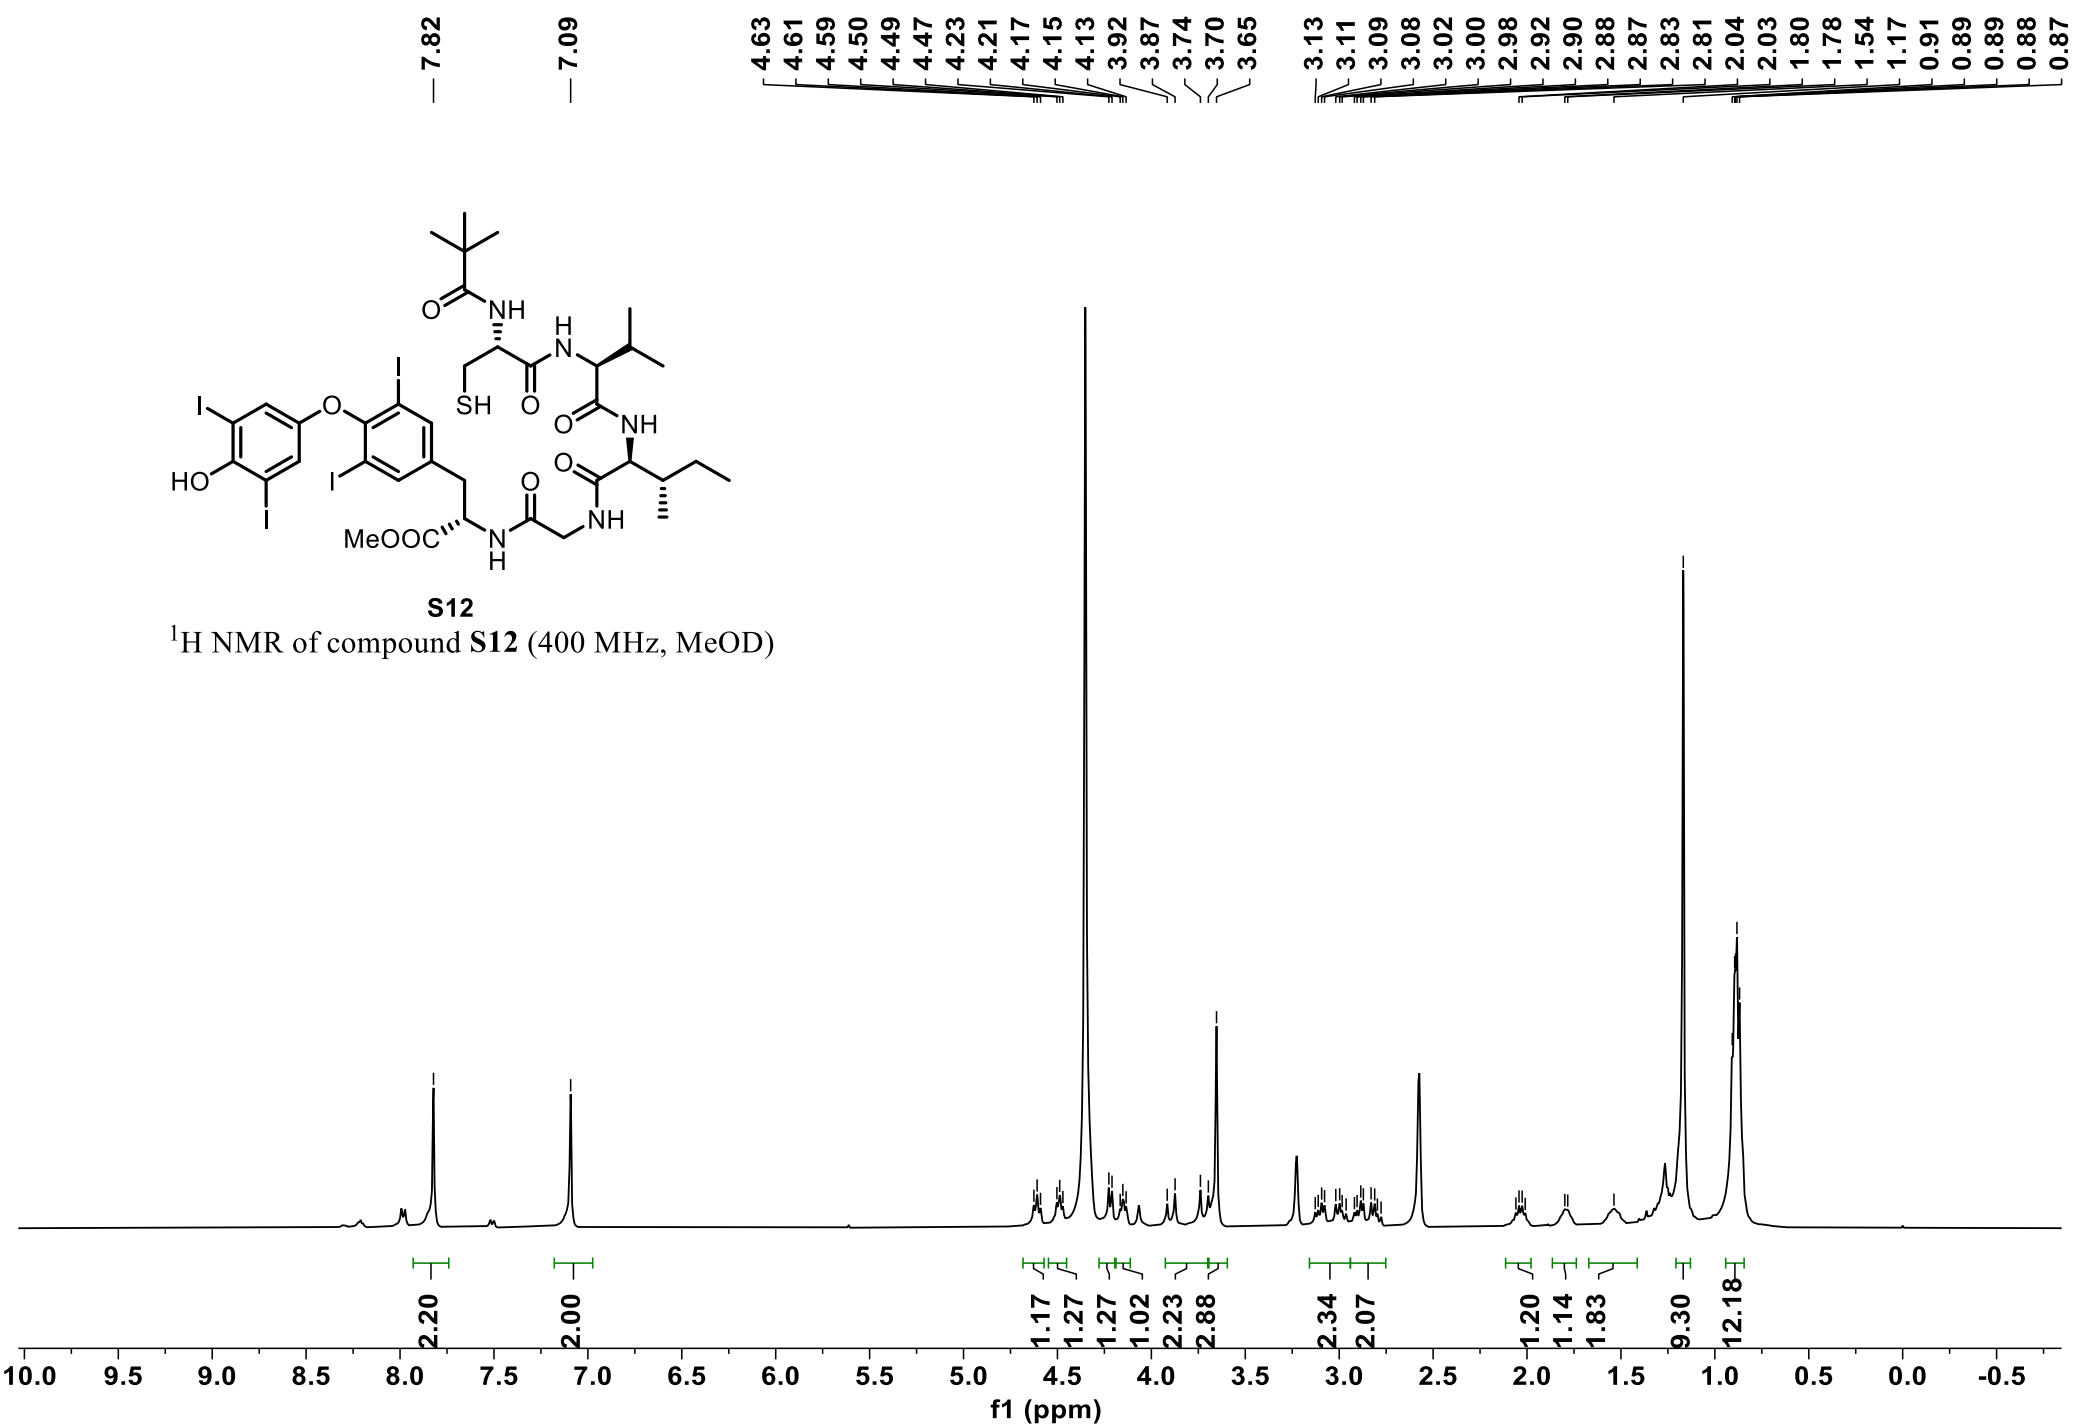

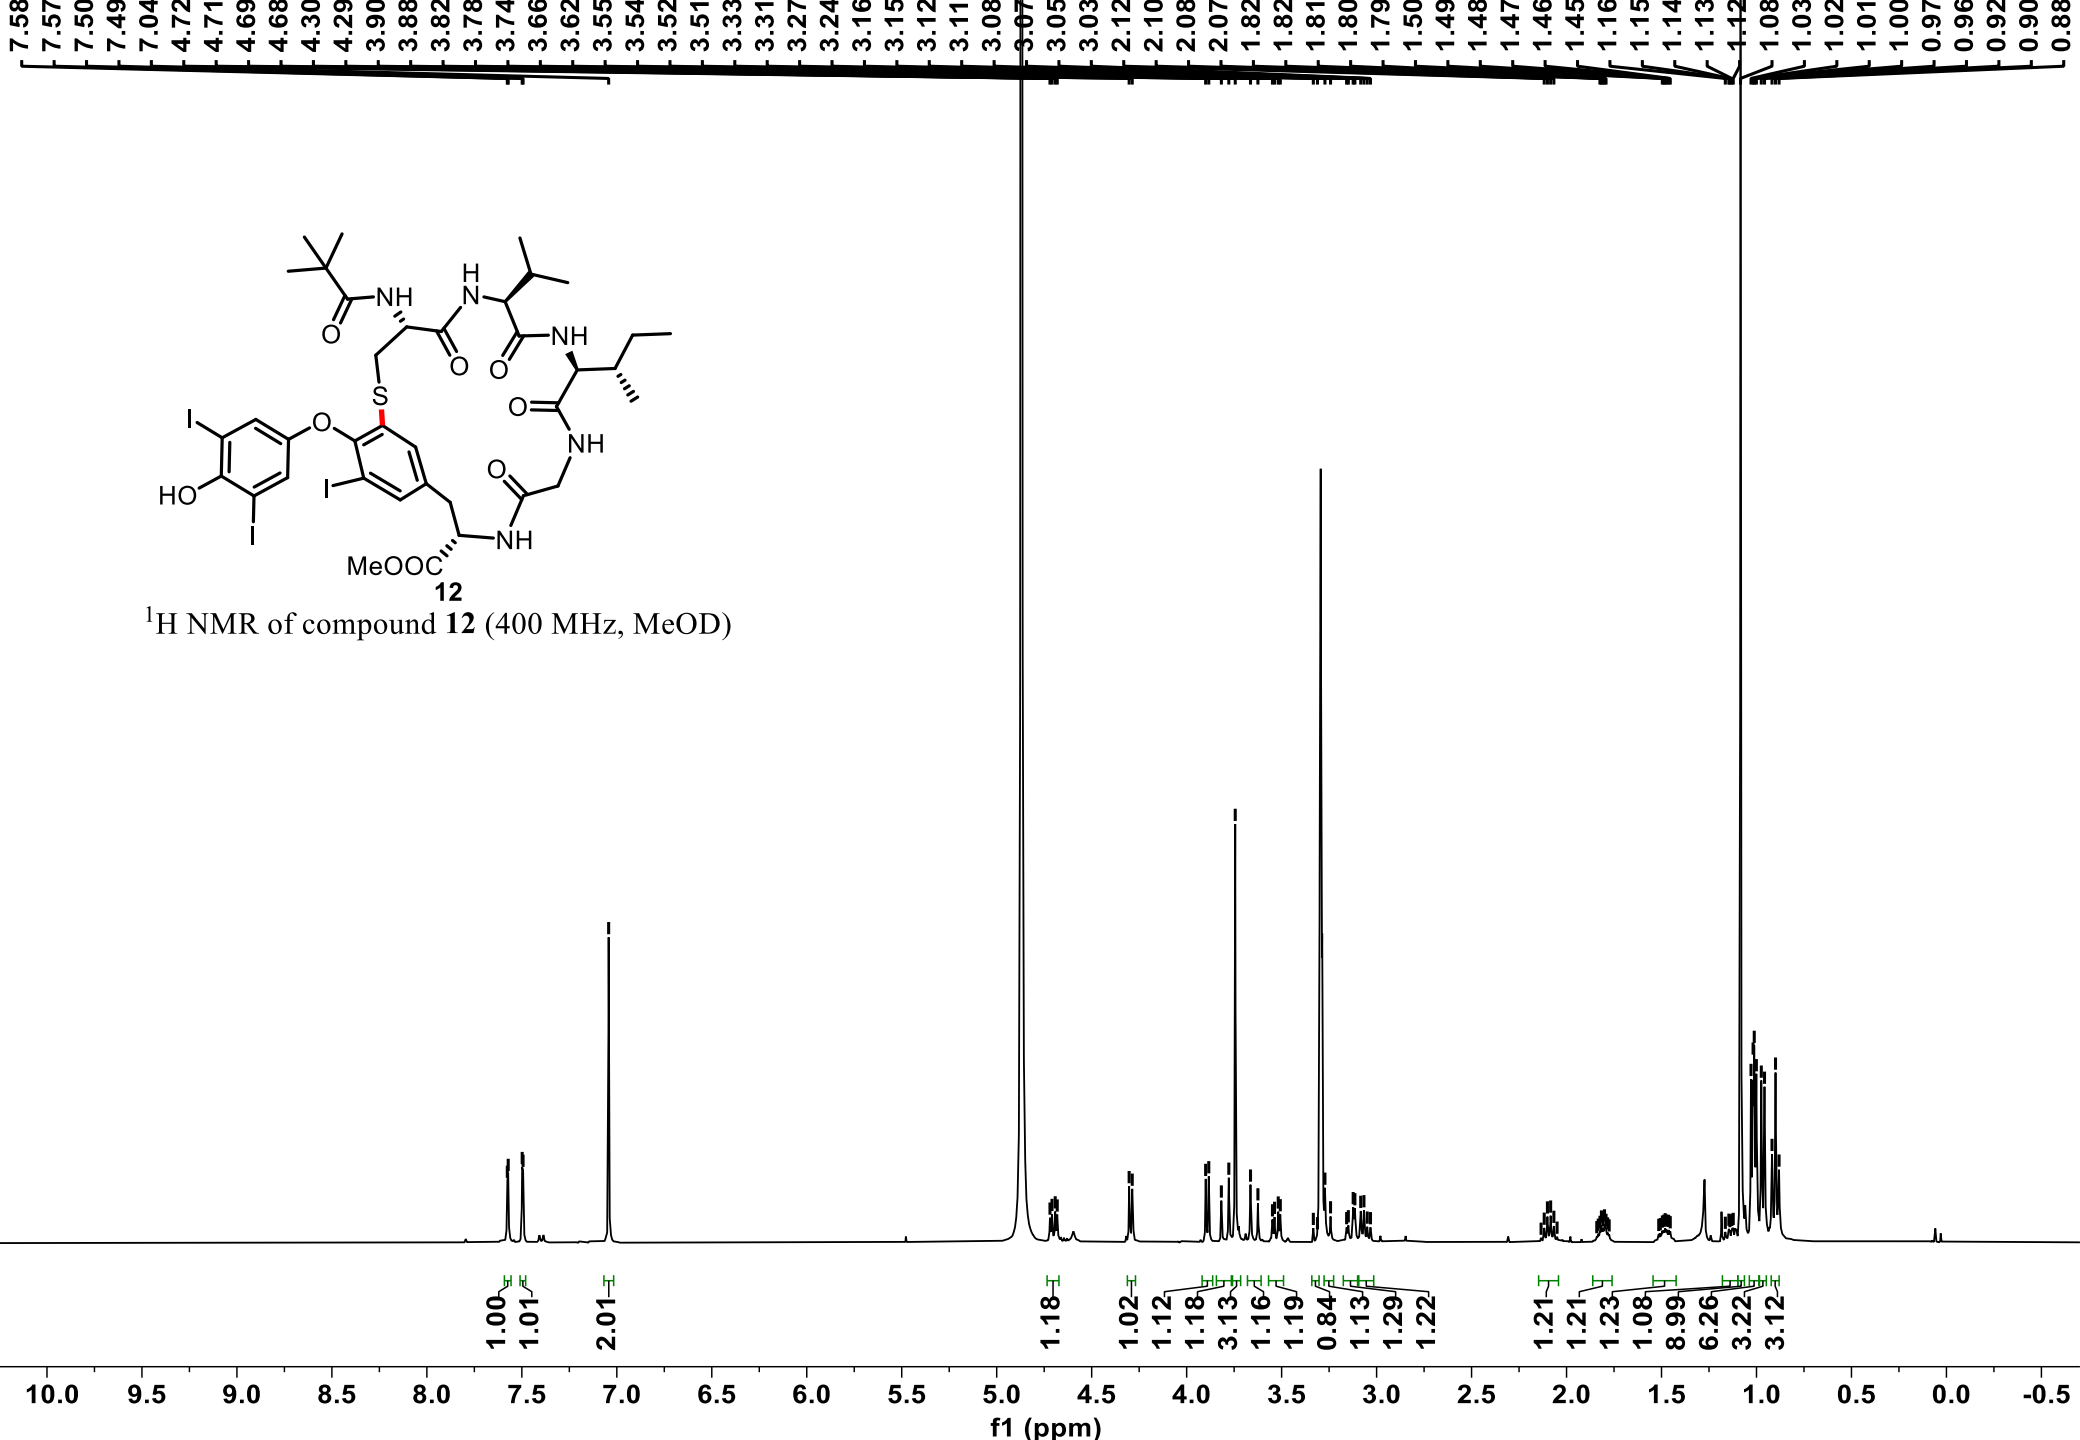

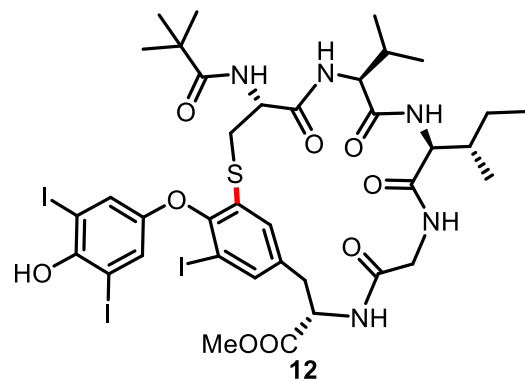

$^{13}\text{C}$  NMR of compound **12** (101 MHz, DMSO)

177.46  
171.11  
170.80  
170.68  
170.44  
168.88

147.50  
137.51  
136.75  
135.76  
133.67  
129.62  
128.60  
128.19  
128.00  
127.88  
126.37  
124.92

92.01  
87.47

77.70

62.83  
60.25  
55.84  
53.23  
51.80  
50.61  
42.45

28.98  
28.78  
28.65  
28.53  
27.19  
26.51  
24.02  
19.20  
18.48  
15.38  
13.92  
11.33

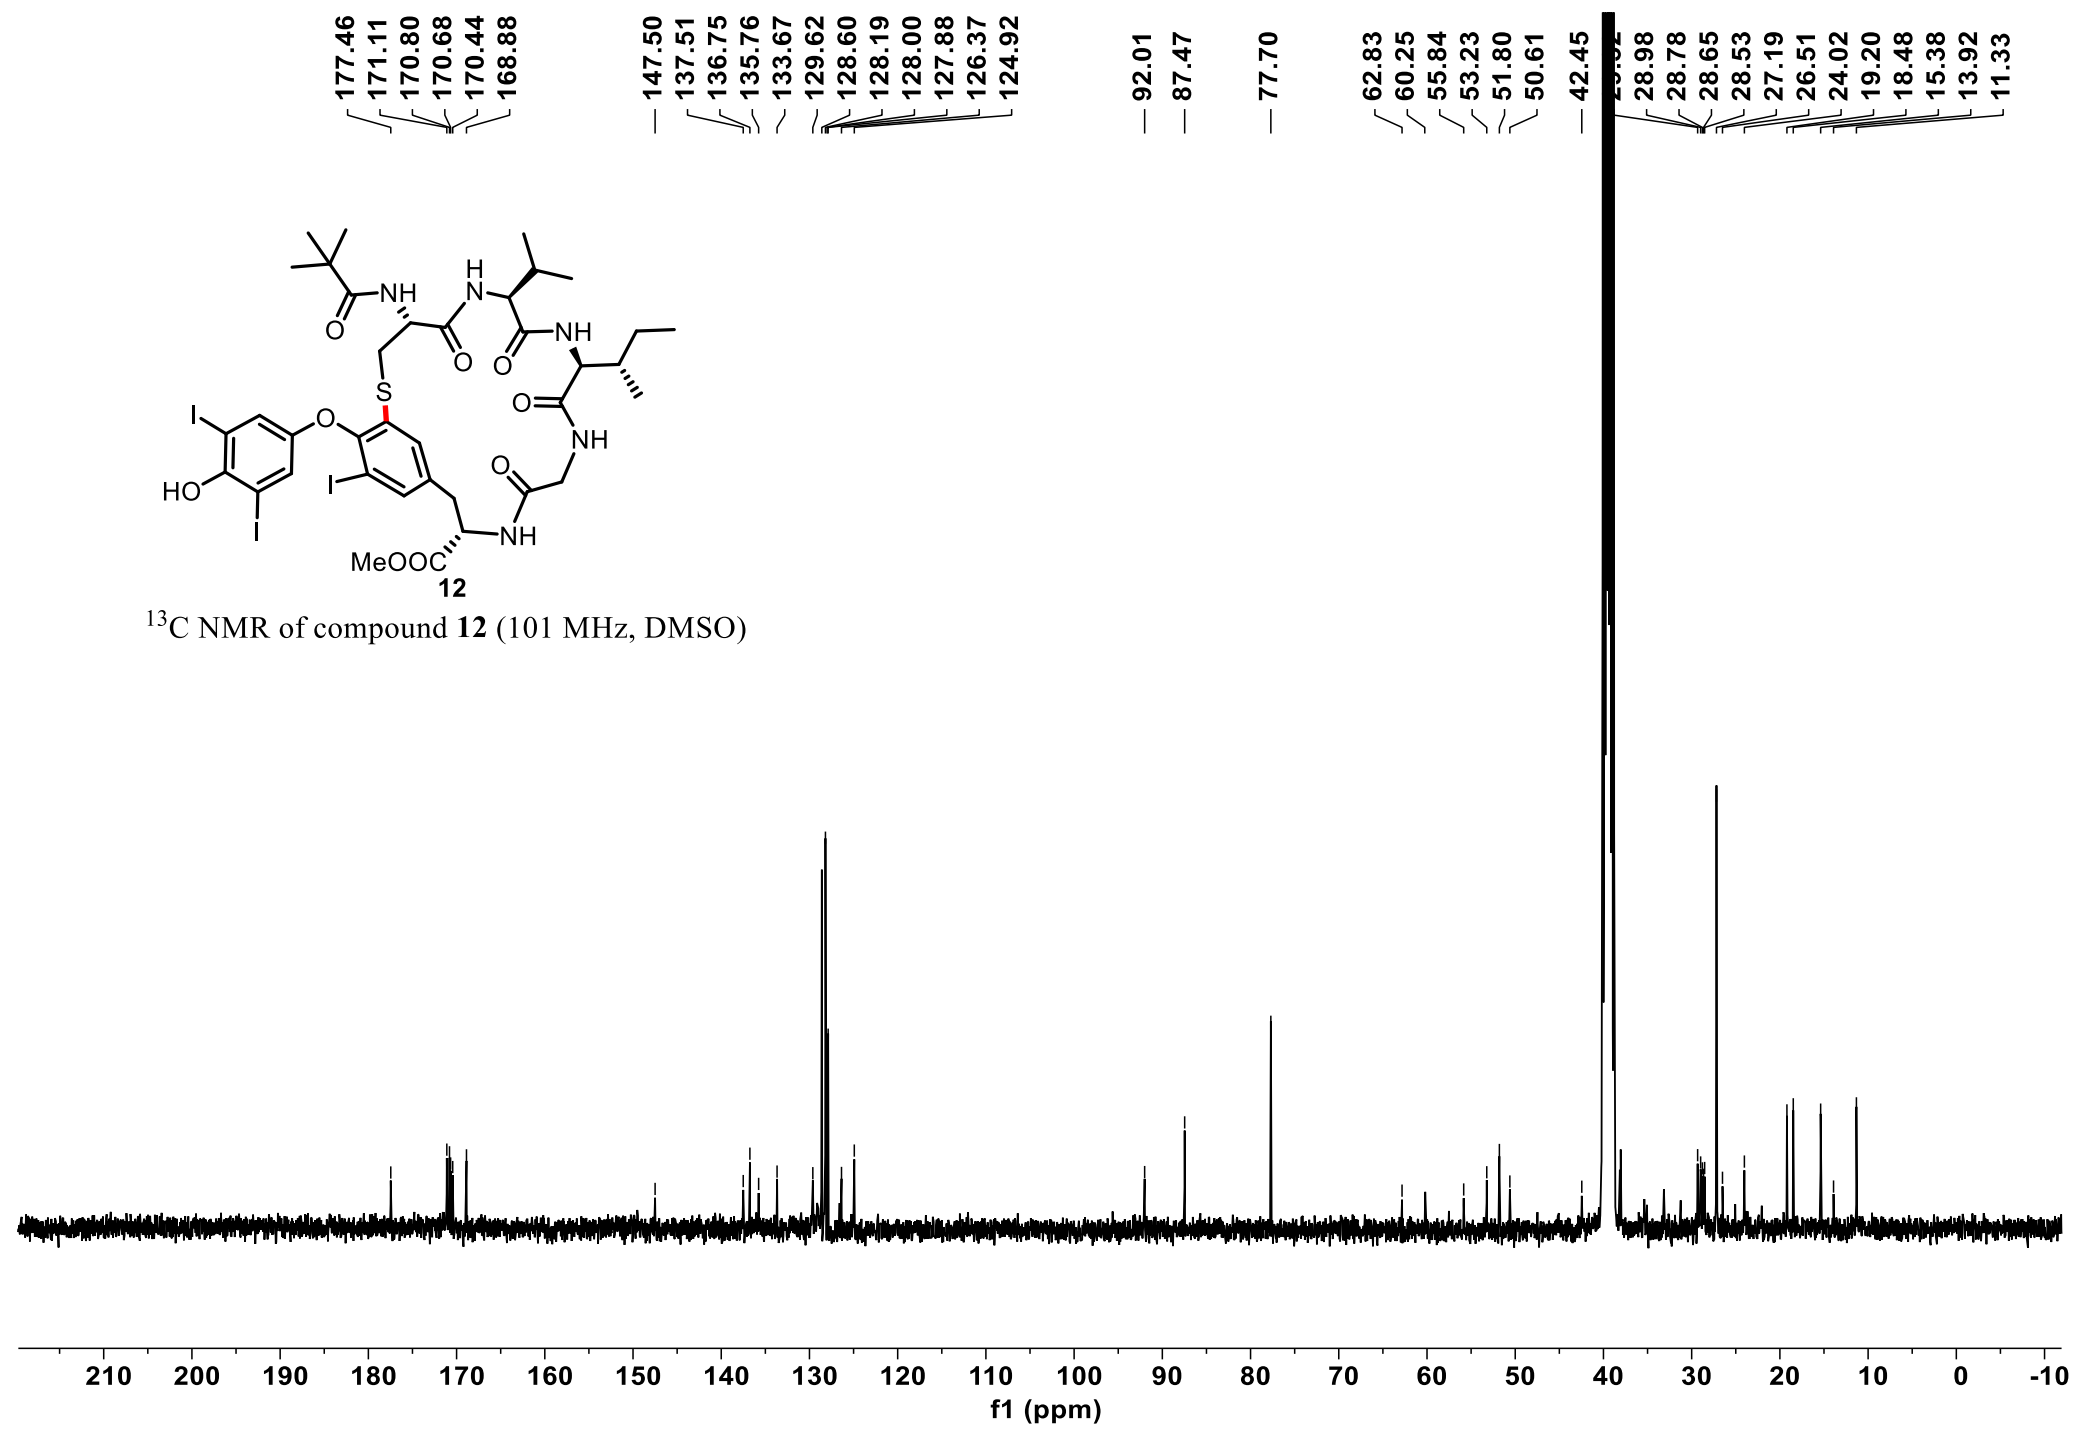

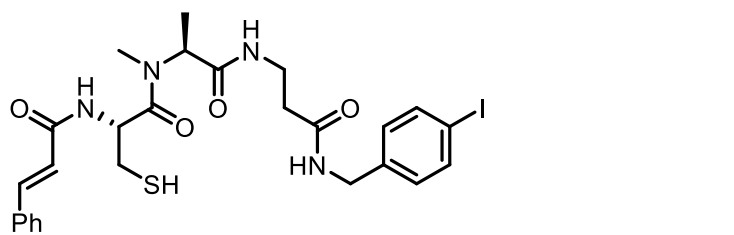

**S13**

<sup>1</sup>H NMR of compound S13 (400 MHz, MeOD)

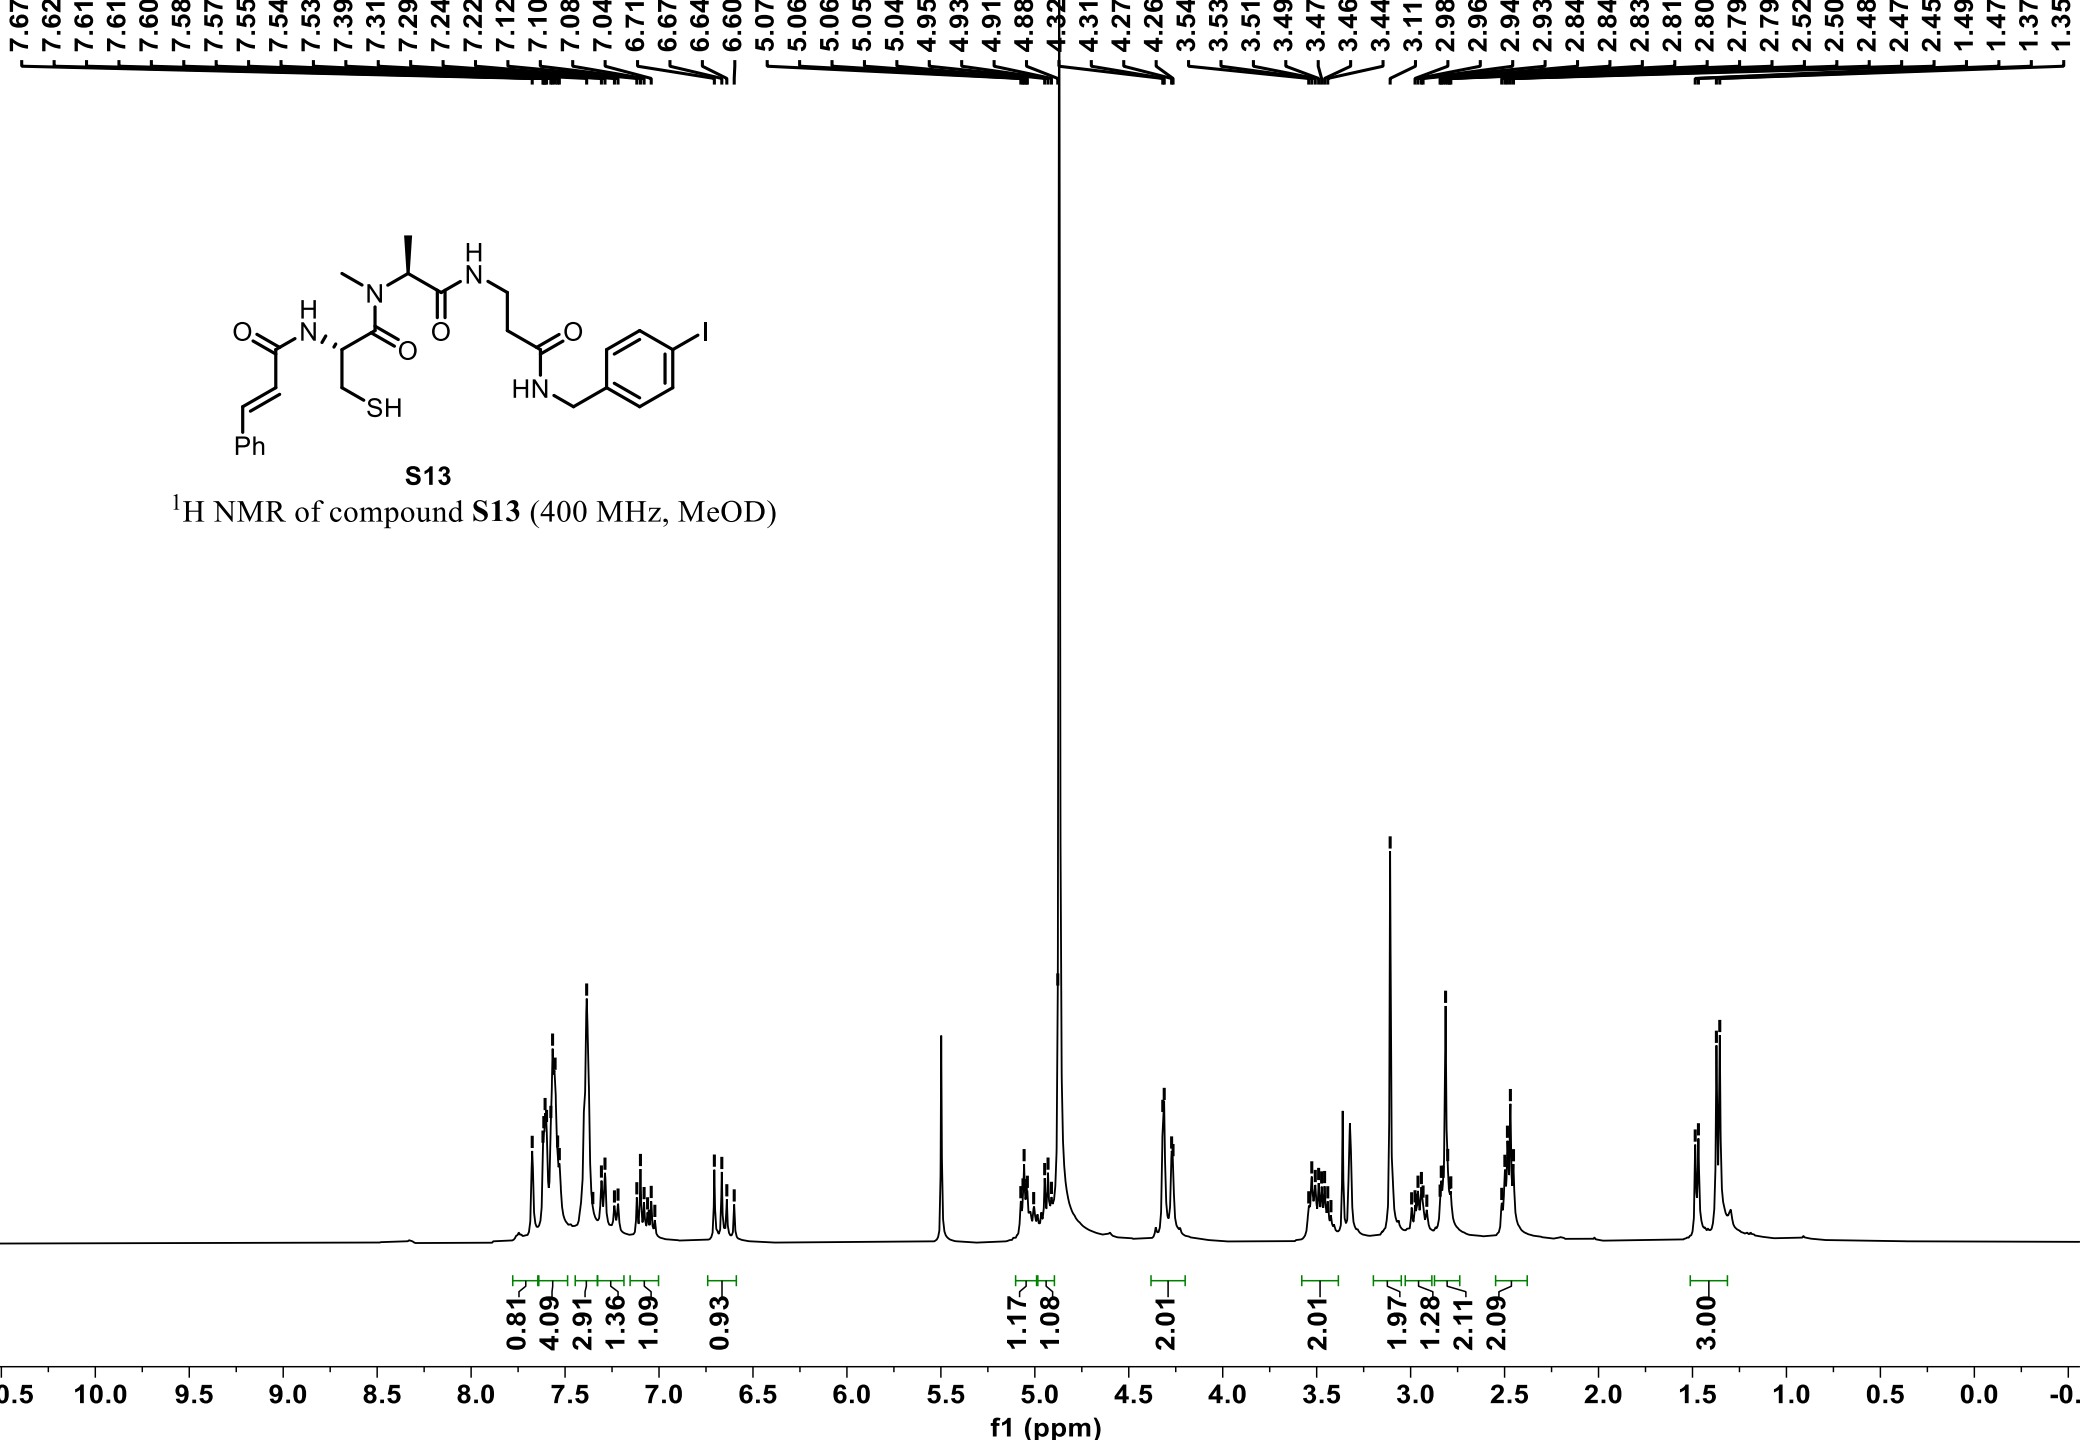

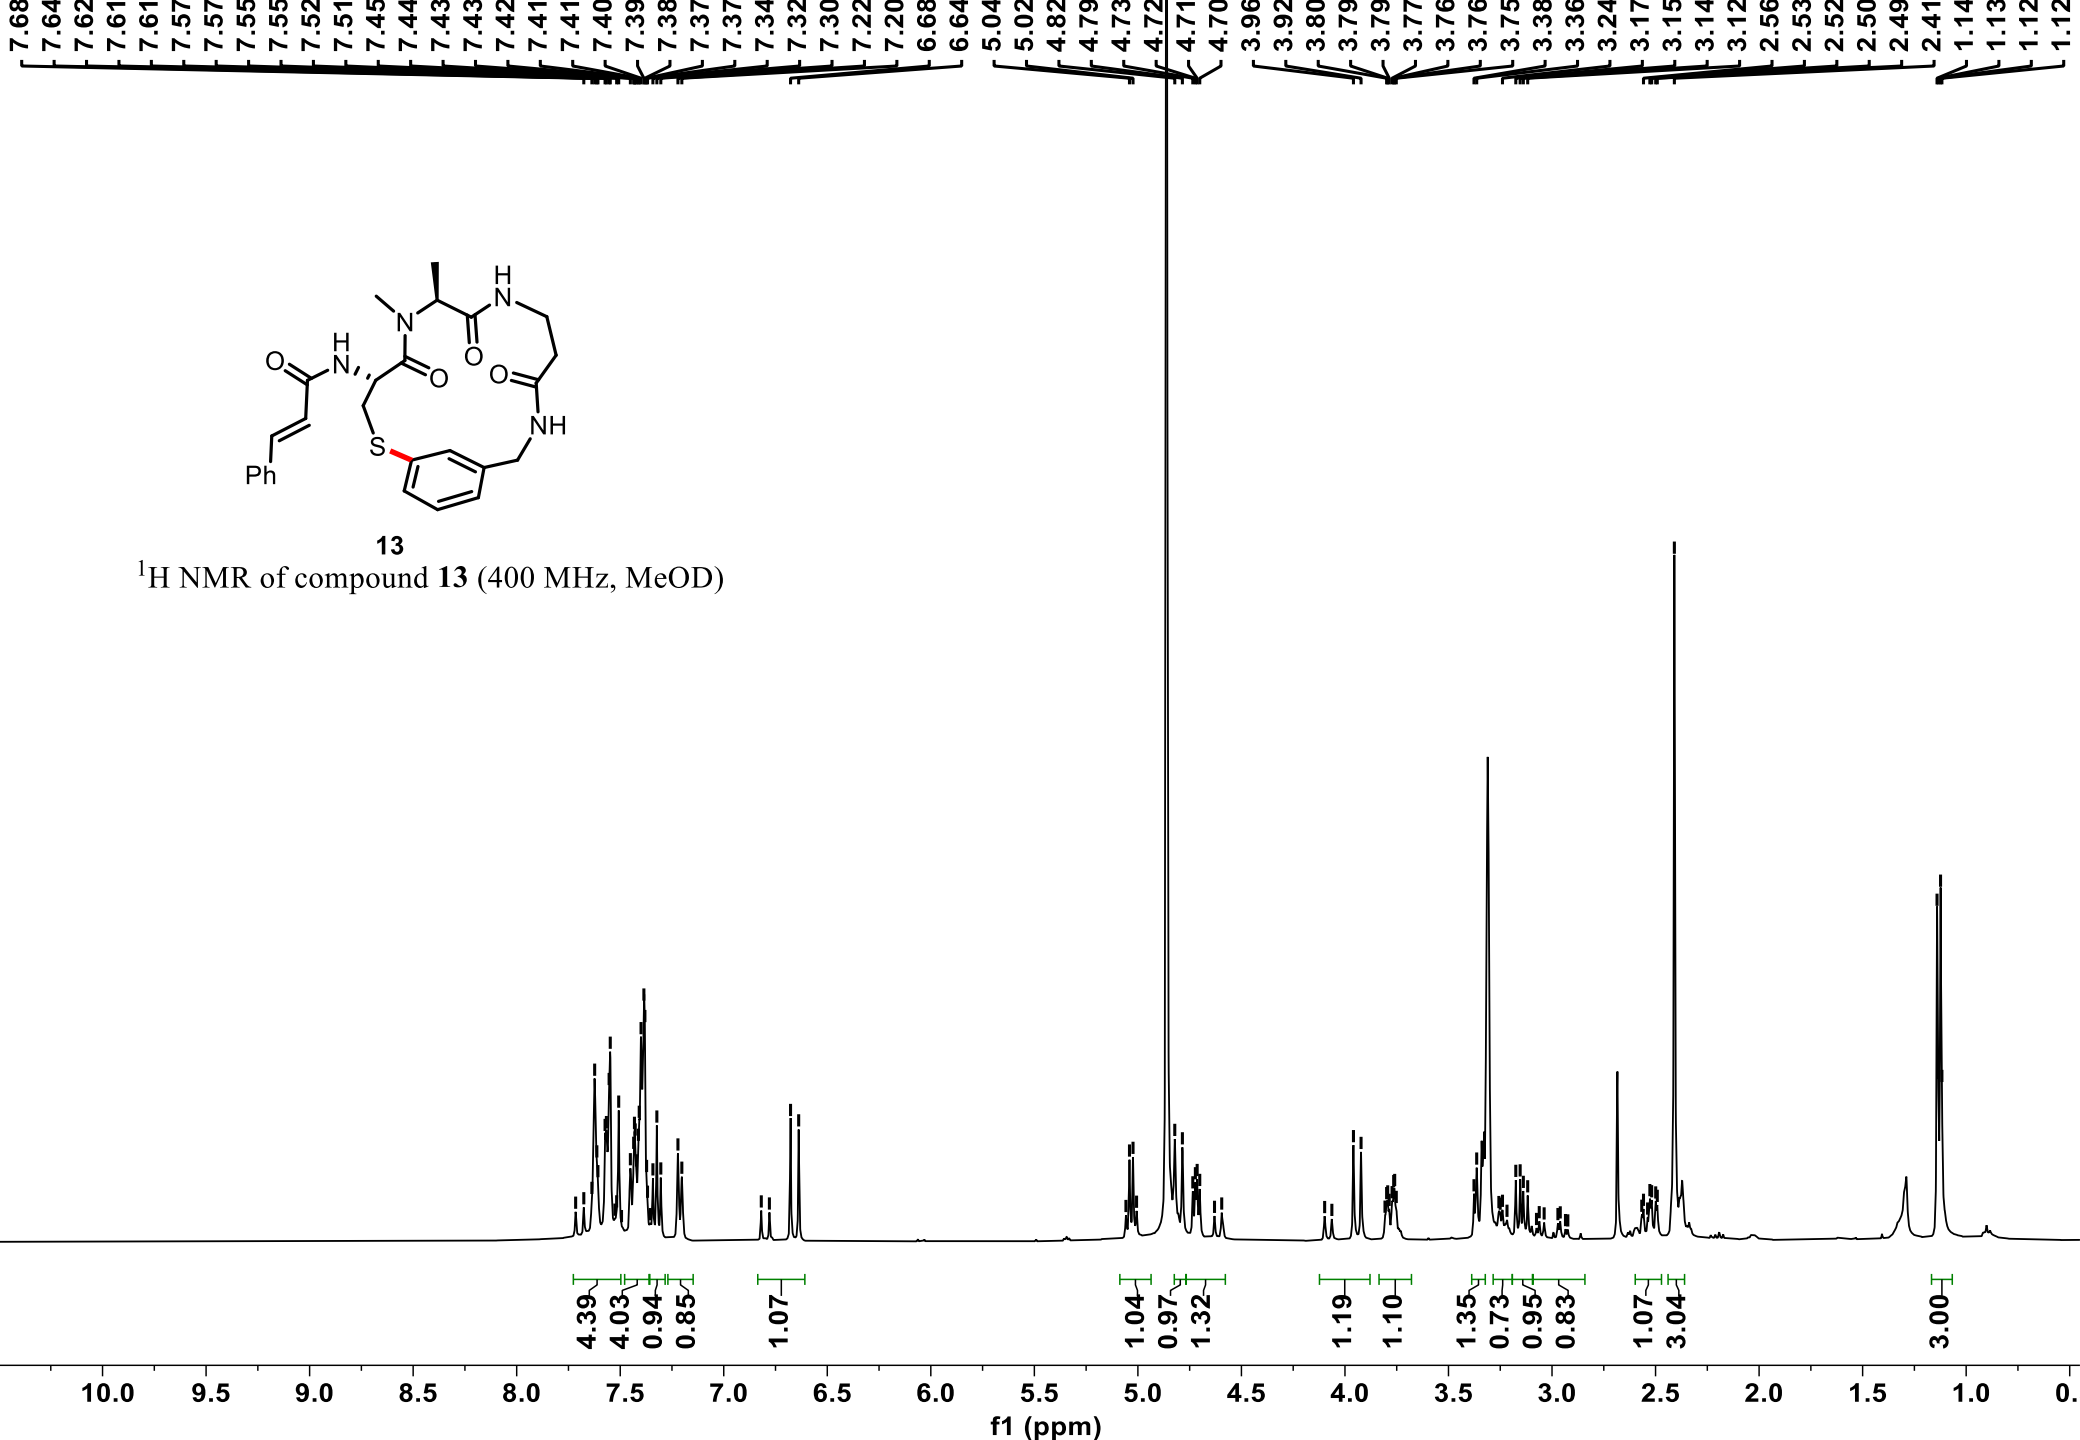

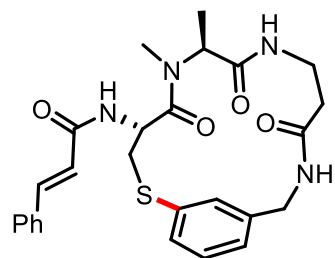

13

$^{13}\text{C}$  NMR of compound 13 (101 MHz, DMSO)

170.63  
170.30  
169.61  
164.81  
141.16  
139.65  
134.67  
129.60  
129.51  
128.94  
128.86  
128.17  
127.69  
127.56  
126.38  
121.21

52.15  
48.26  
41.84  
35.49  
35.08  
34.70  
29.65  
12.99

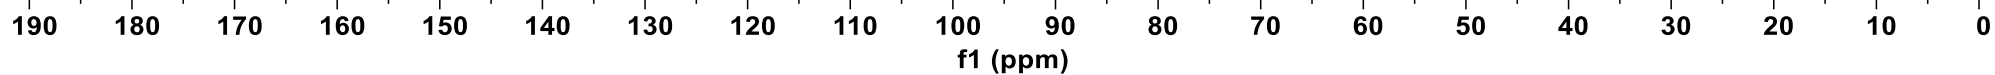

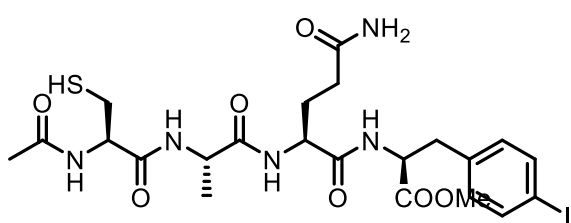

**S14**

<sup>1</sup>H NMR of compound S14 (400 MHz, DMSO)

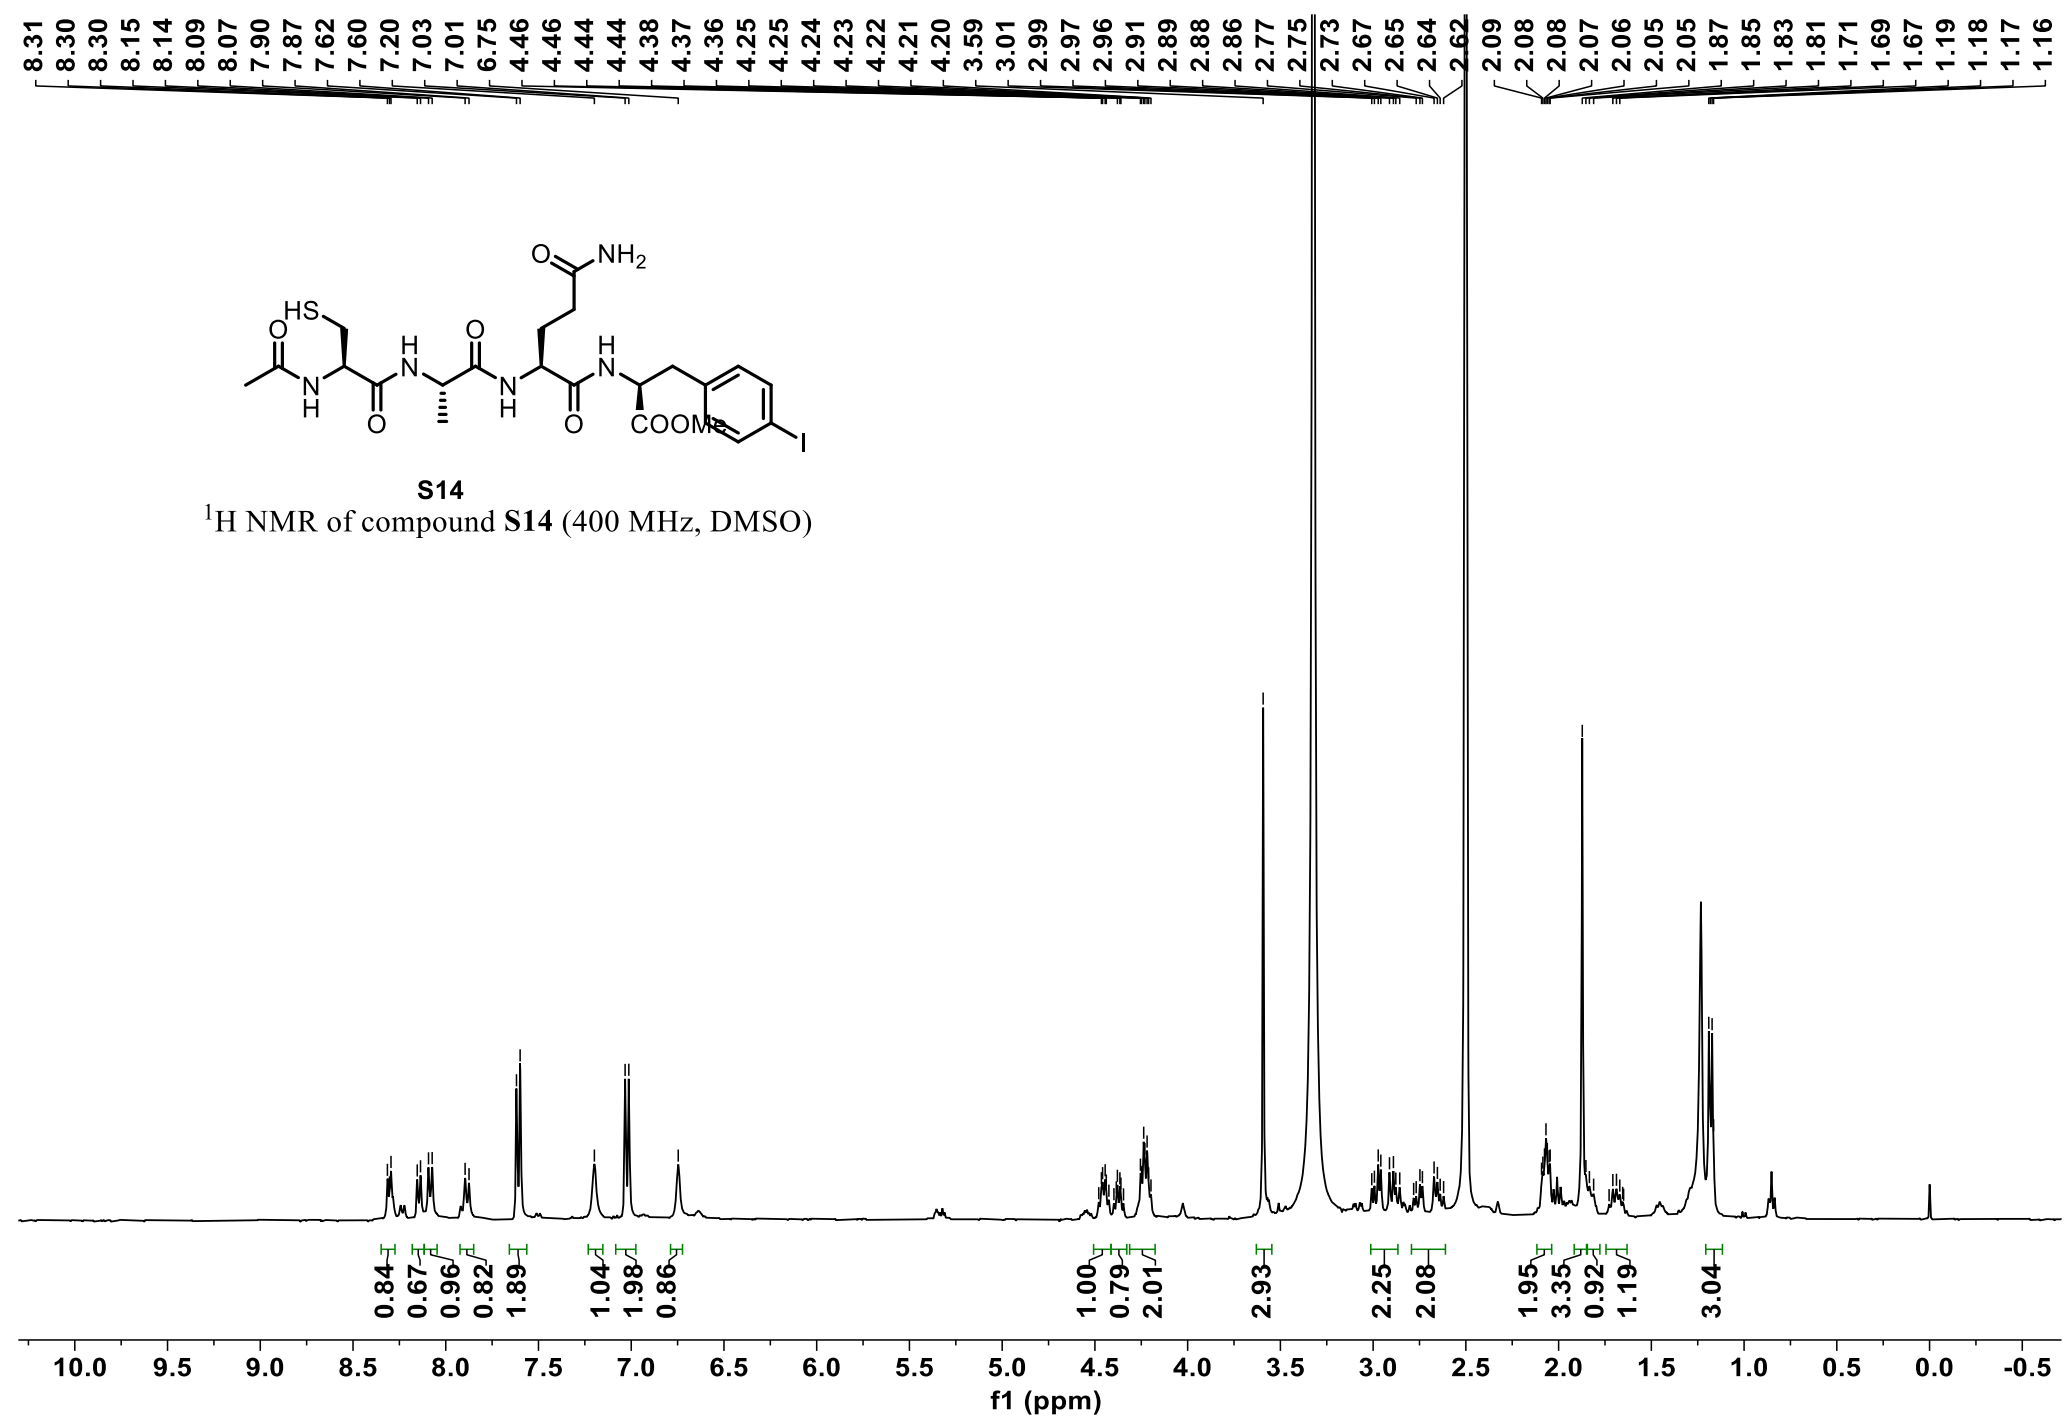



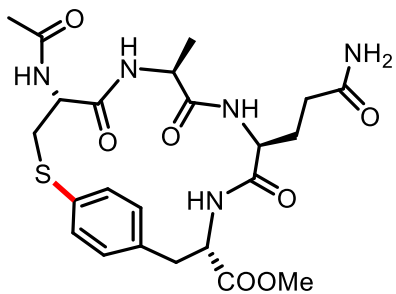

**14**

<sup>1</sup>H NMR of compound **14** (400 MHz, DMSO)

8.23  
8.22  
8.21  
8.20  
7.96  
7.94  
7.44  
7.42  
7.25  
7.20  
7.18  
7.10  
7.08  
6.72  
4.55  
4.53  
4.50  
4.29  
4.28  
4.27  
4.16  
4.14  
4.13  
4.03  
4.01  
4.00  
3.98  
3.70  
3.51  
3.49  
3.47  
3.46  
3.16  
3.13  
3.12  
2.90  
2.89  
2.86  
2.85  
2.72  
2.68  
2.65  
2.03  
2.01  
1.99  
1.97  
1.96  
1.88  
1.79  
1.77  
1.76  
1.74  
1.72  
1.17  
1.15

1.82  
0.94  
0.99  
0.83  
1.86  
1.83  
0.94

1.00  
1.10  
1.21  
1.40  
3.08  
1.39  
1.22  
1.27  
1.30

2.41  
2.94  
2.24  
3.28

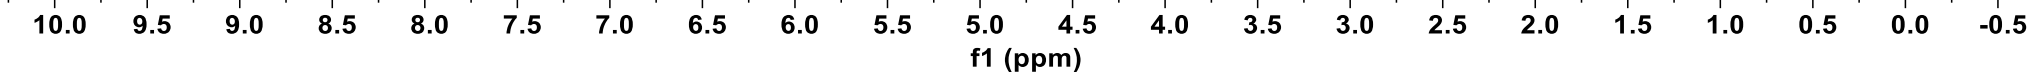



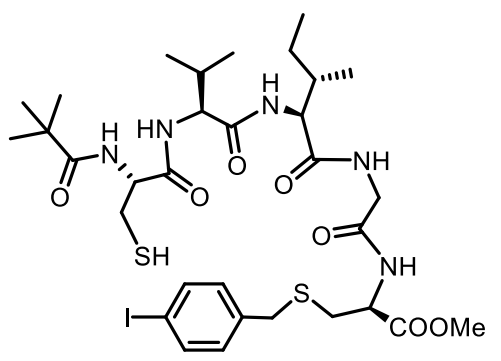

**S15**

<sup>1</sup>H NMR of compound **S15** (400 MHz, Acetic Acid-*d*<sub>4</sub>)

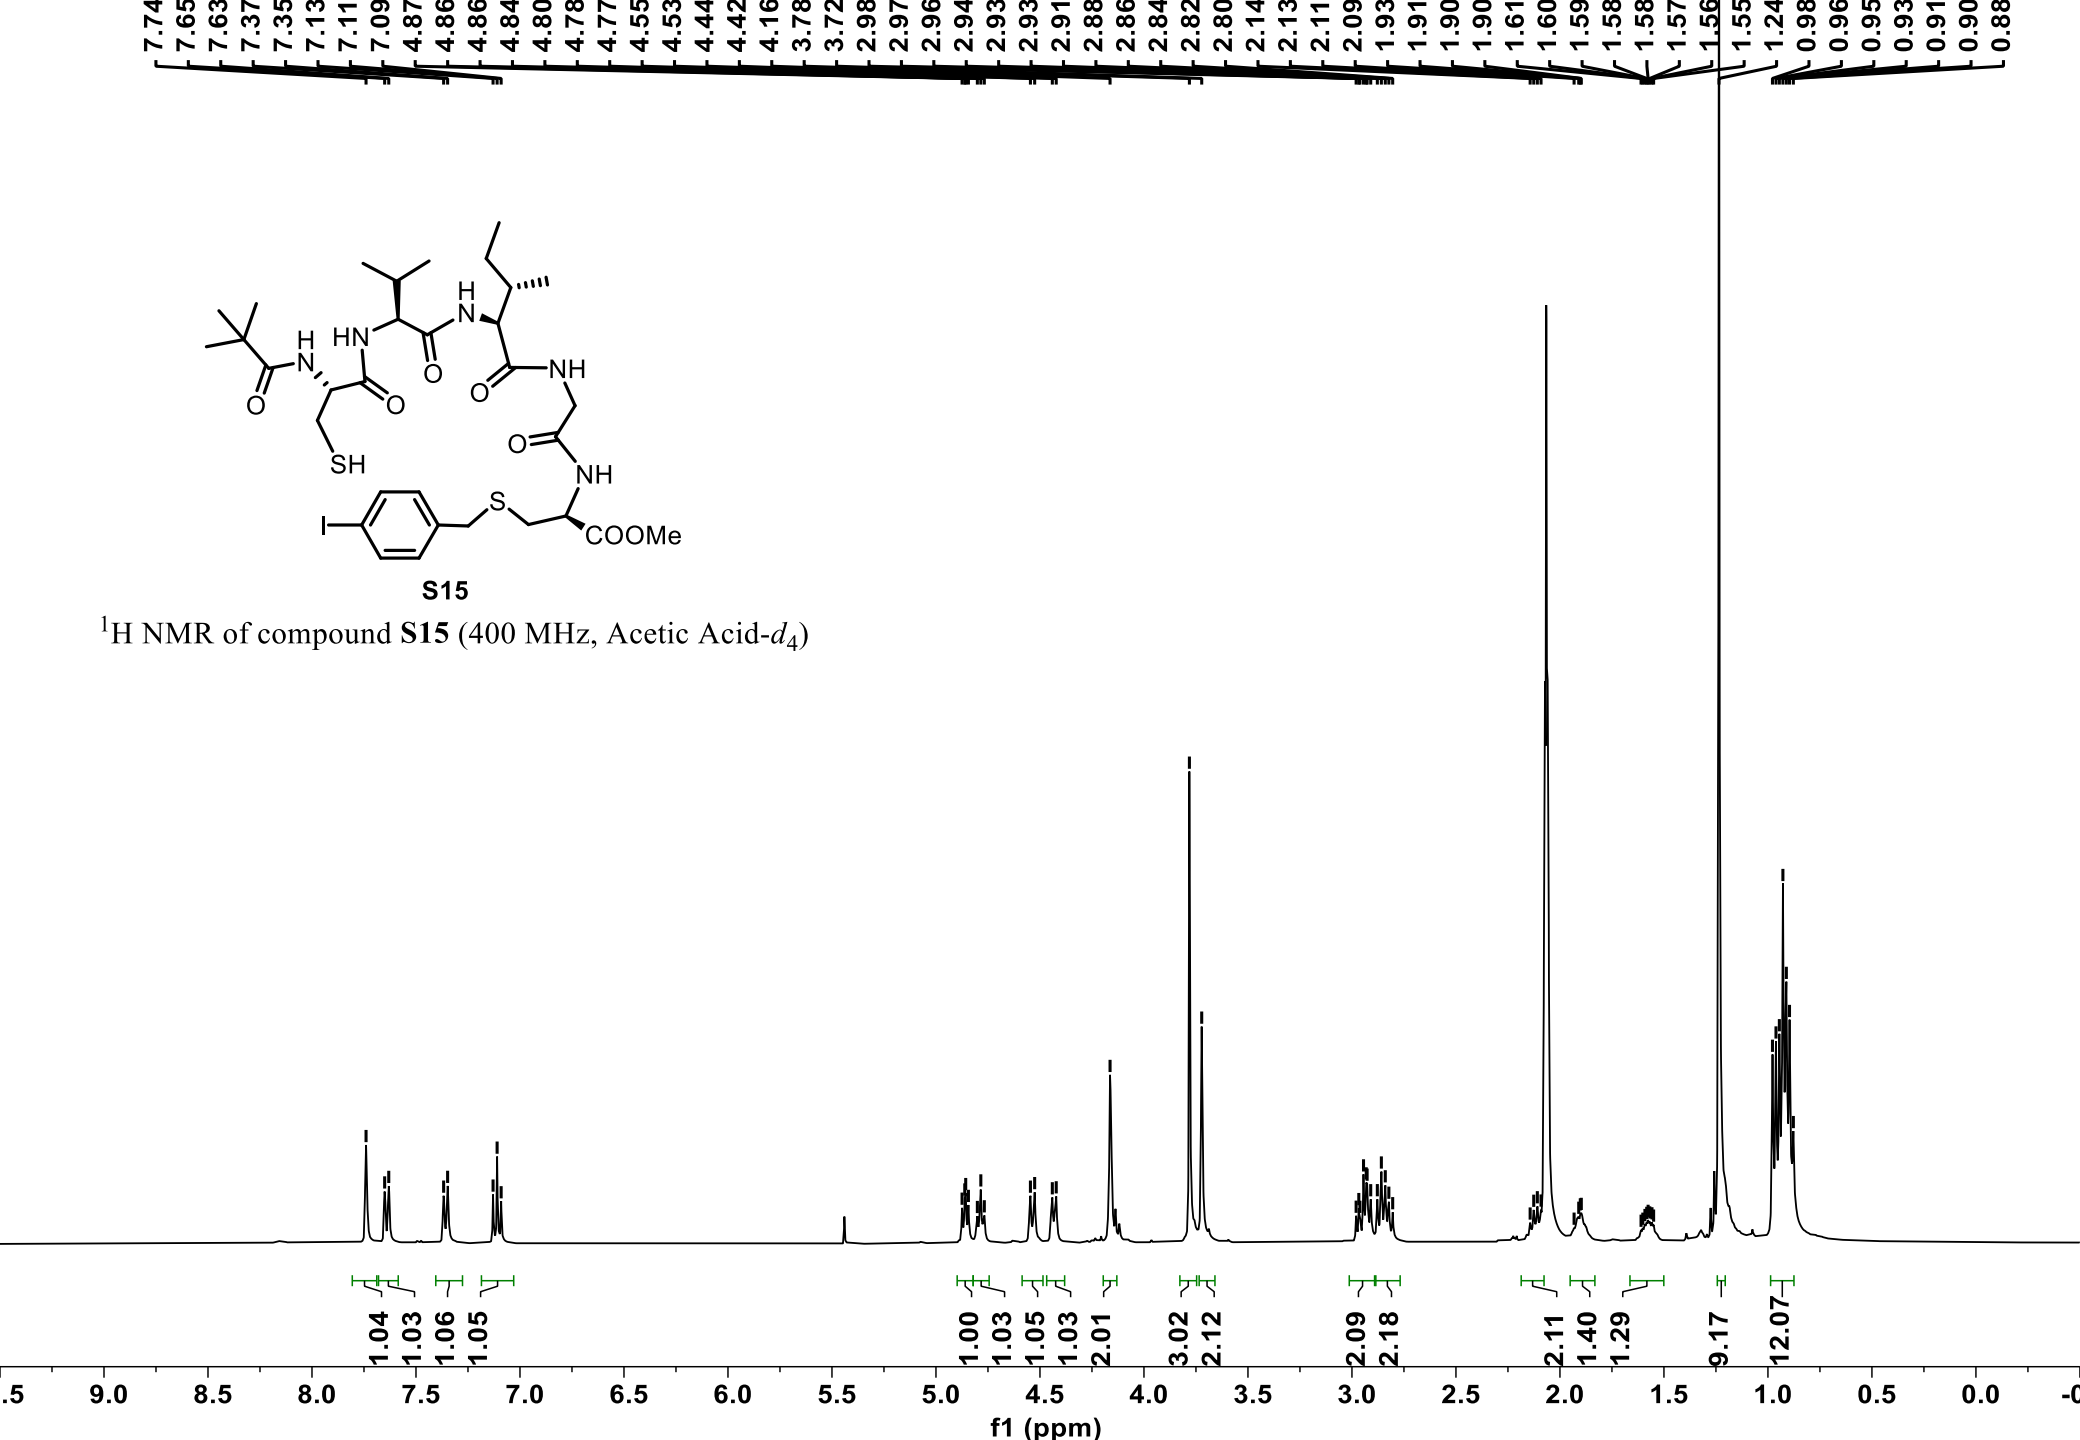

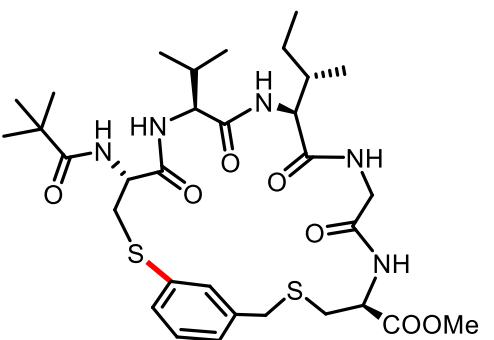

**15**

$^1\text{H}$  NMR of compound **15** (400 MHz, Acetic Acid- $d_4$ )

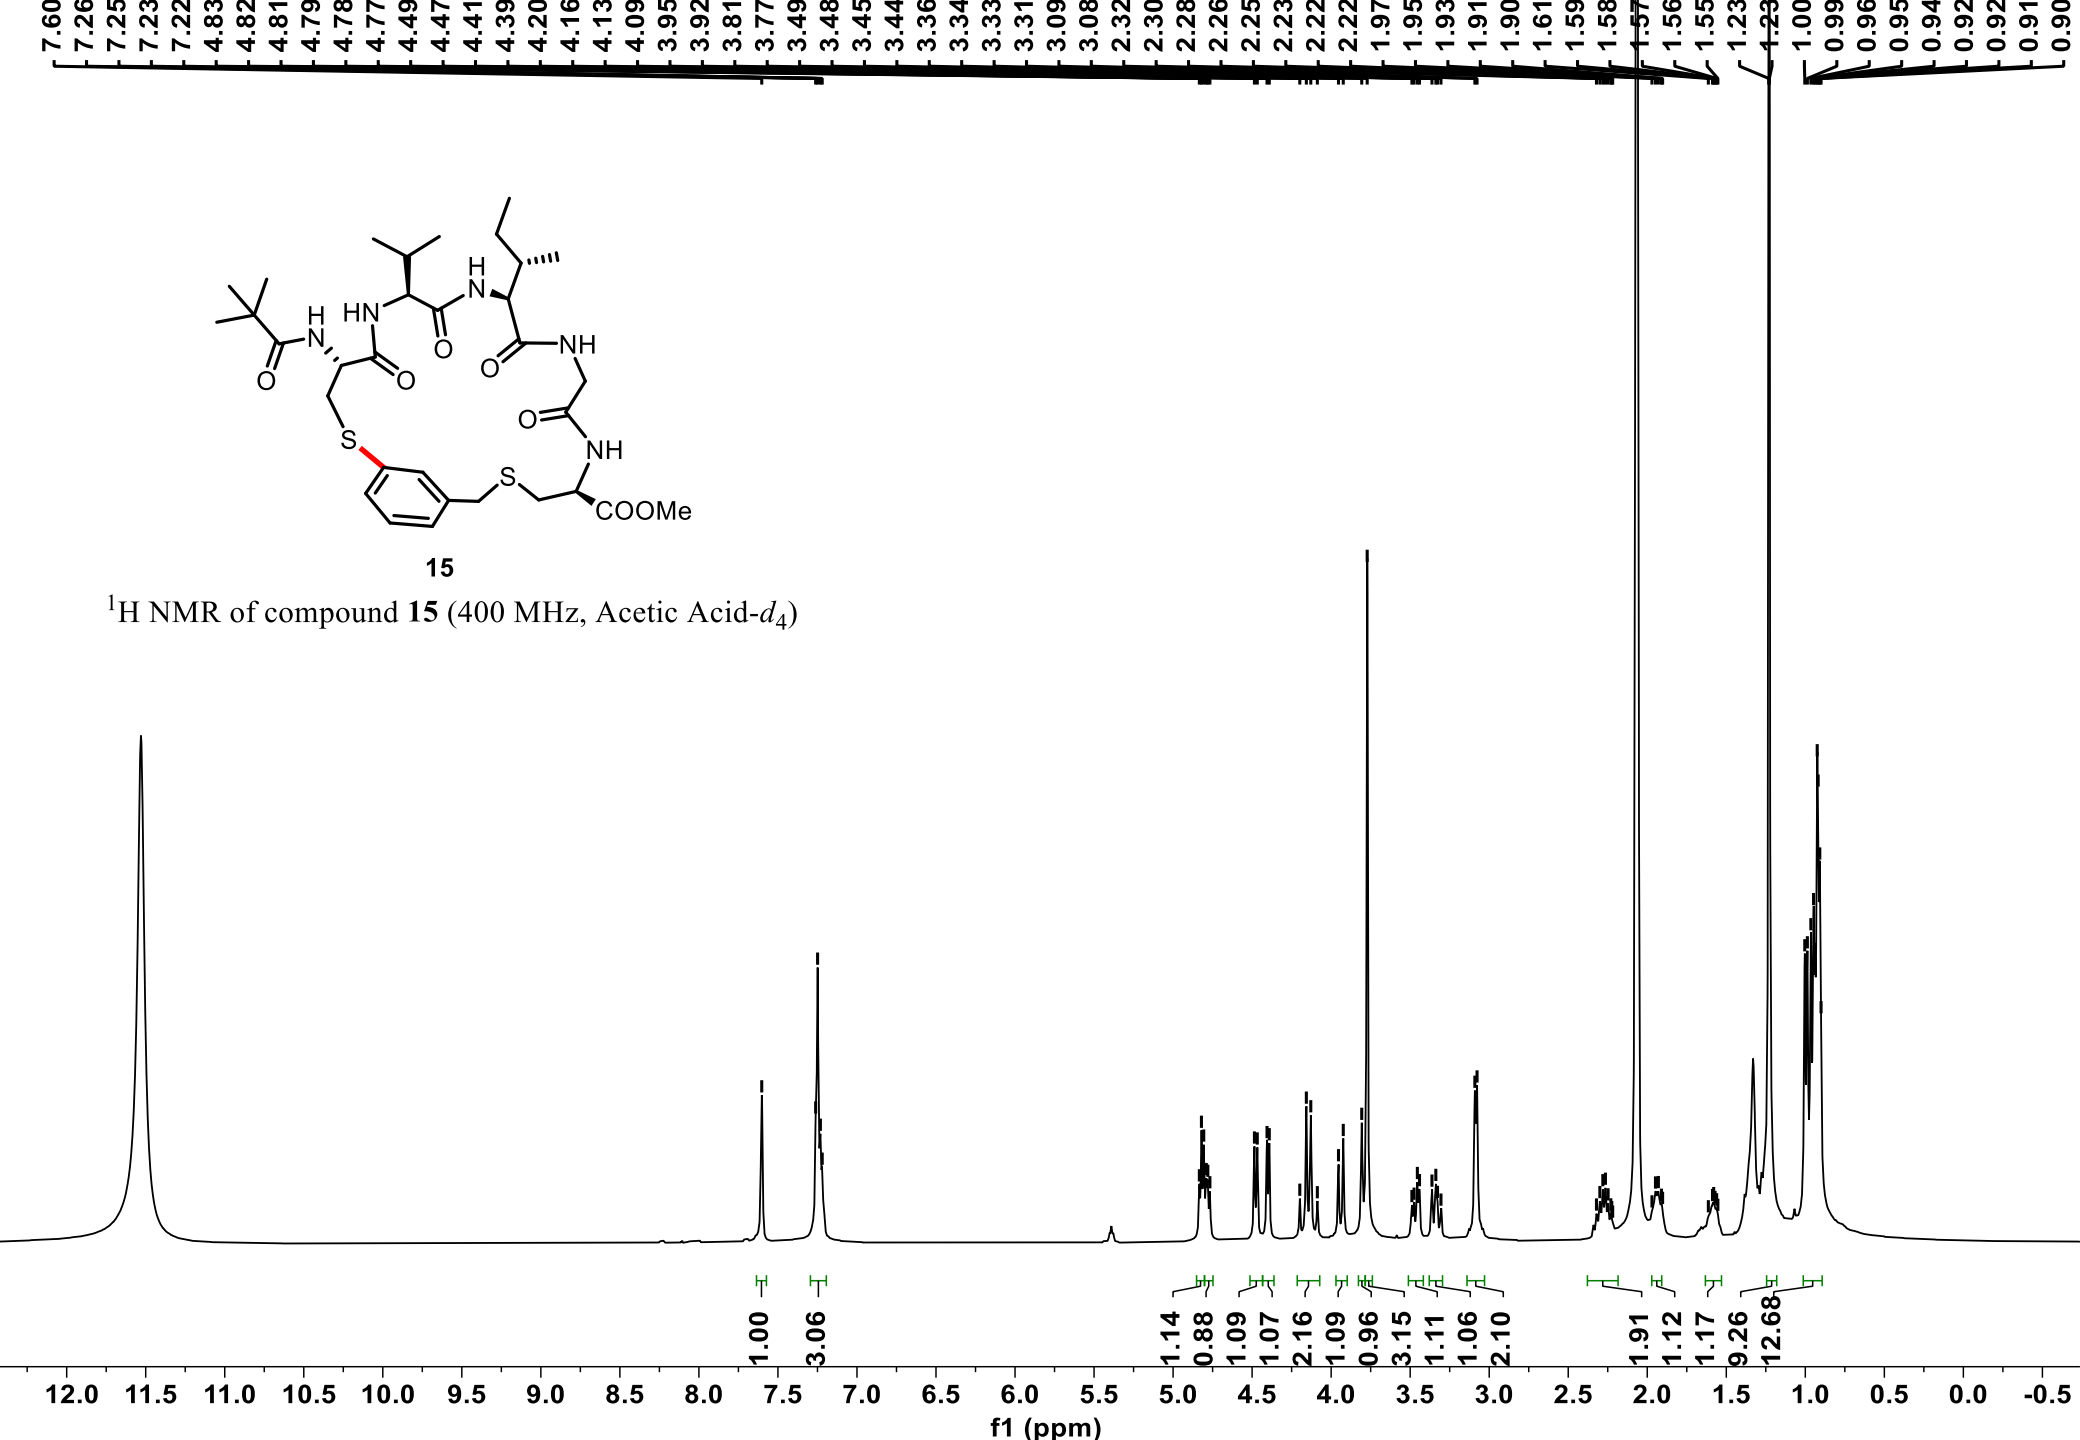

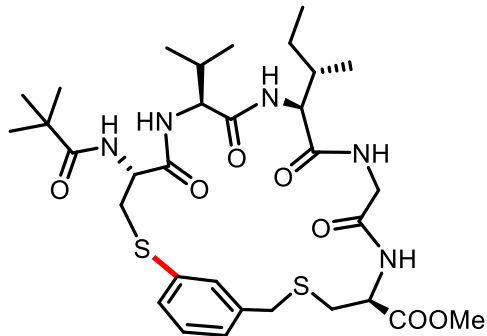

178.13  
171.71  
171.26  
171.17  
171.10  
169.29

139.61  
136.94  
129.17  
128.34  
126.99  
126.23

59.41  
57.16  
53.25  
52.57  
52.19  
42.26  
38.55  
37.26  
36.67  
34.41  
33.27  
30.10  
27.71  
24.70  
19.62  
18.32  
15.66  
11.41

**15**

<sup>13</sup>C NMR of compound **15** (101 MHz, DMSO)

220 210 200 190 180 170 160 150 140 130 120 110 100 90 80 70 60 50 40 30 20 10 0 -10

f1 (ppm)

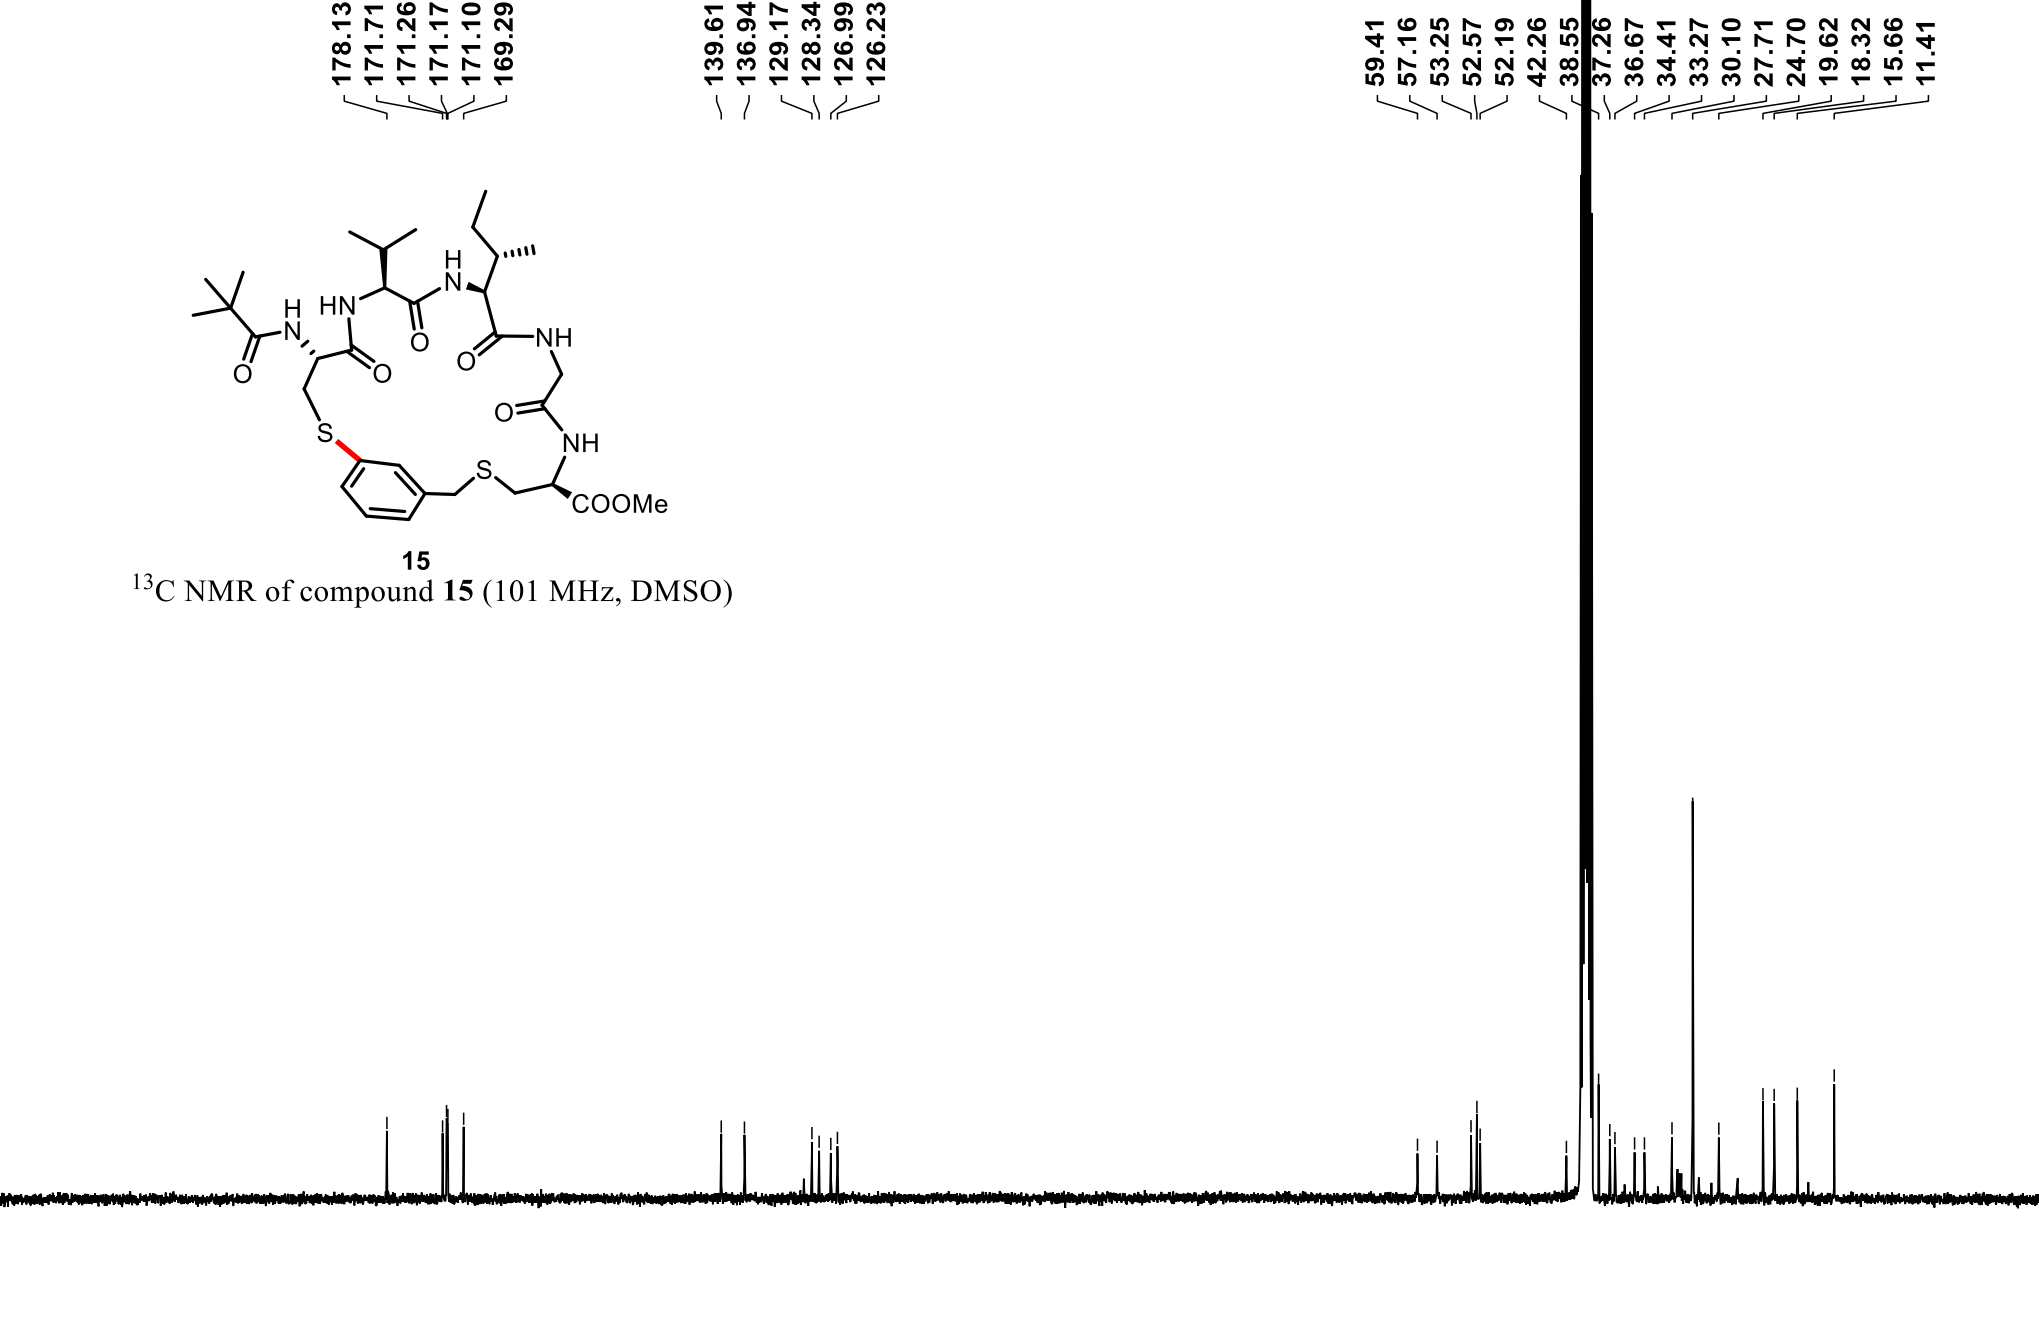

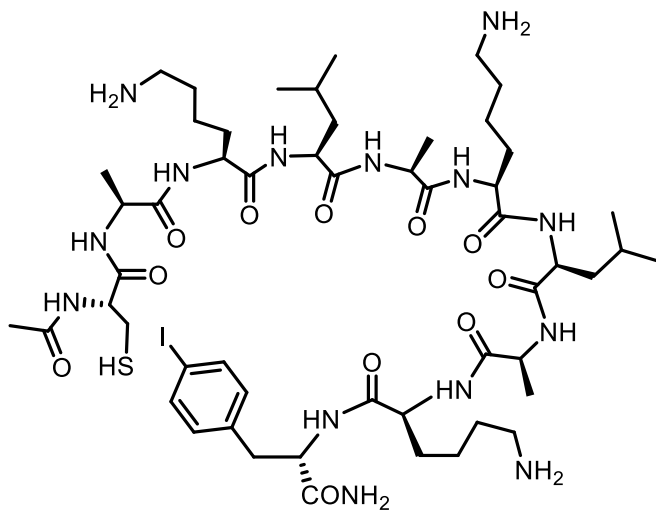

**S16**

$^1\text{H}$  NMR of compound **S16** (400 MHz, 5%MeOD in  $\text{DMSO-}d_6$ )

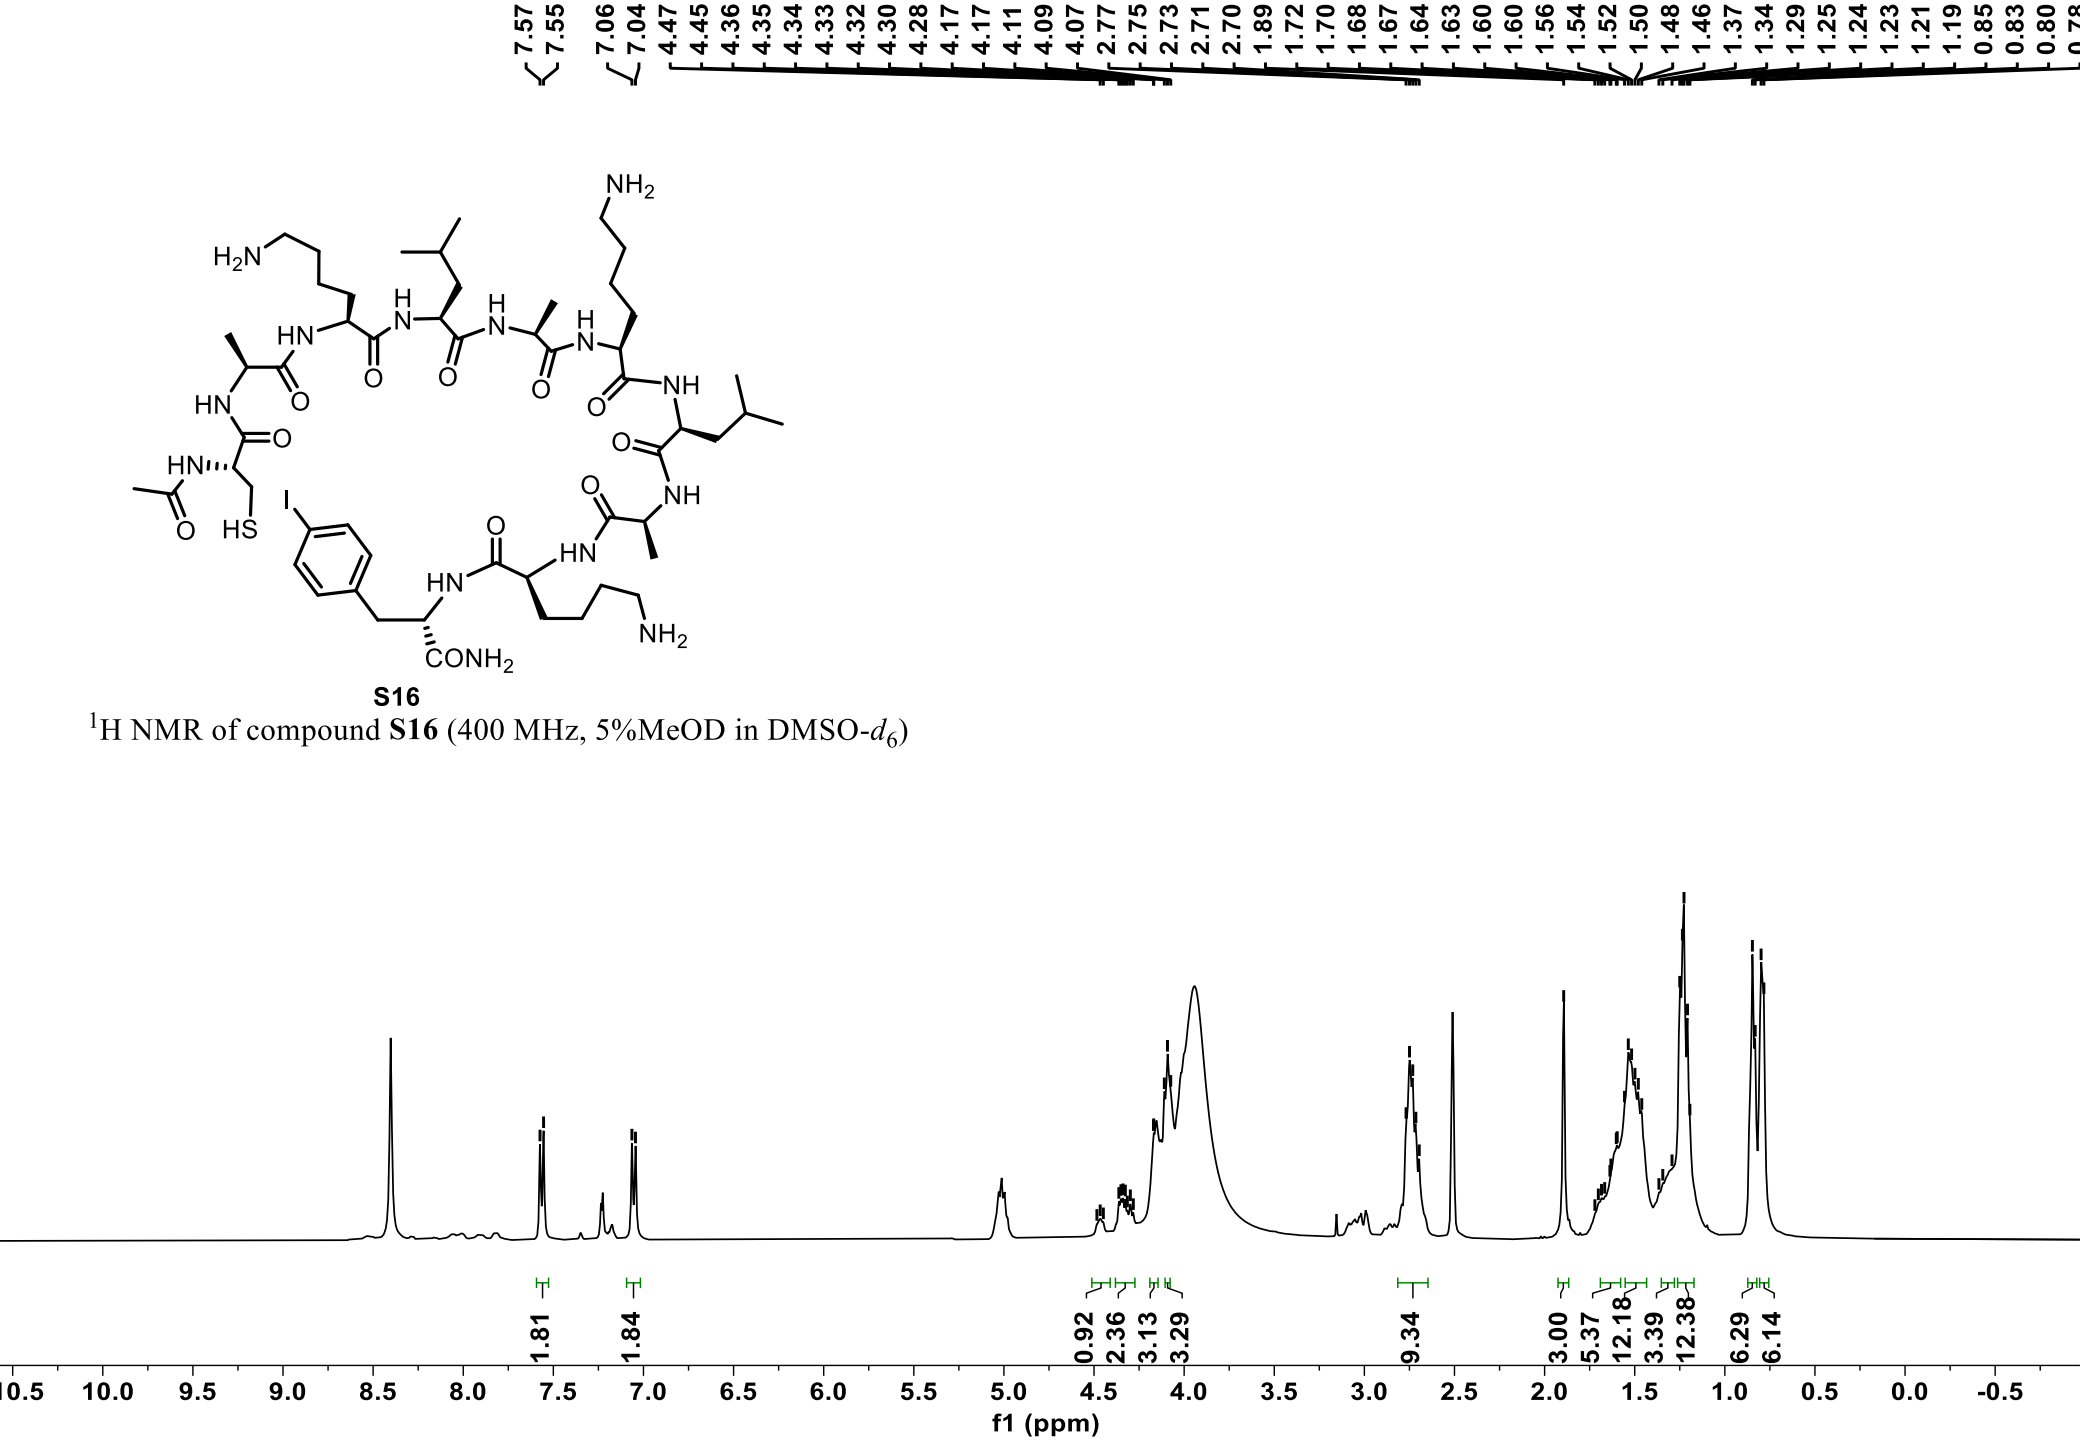

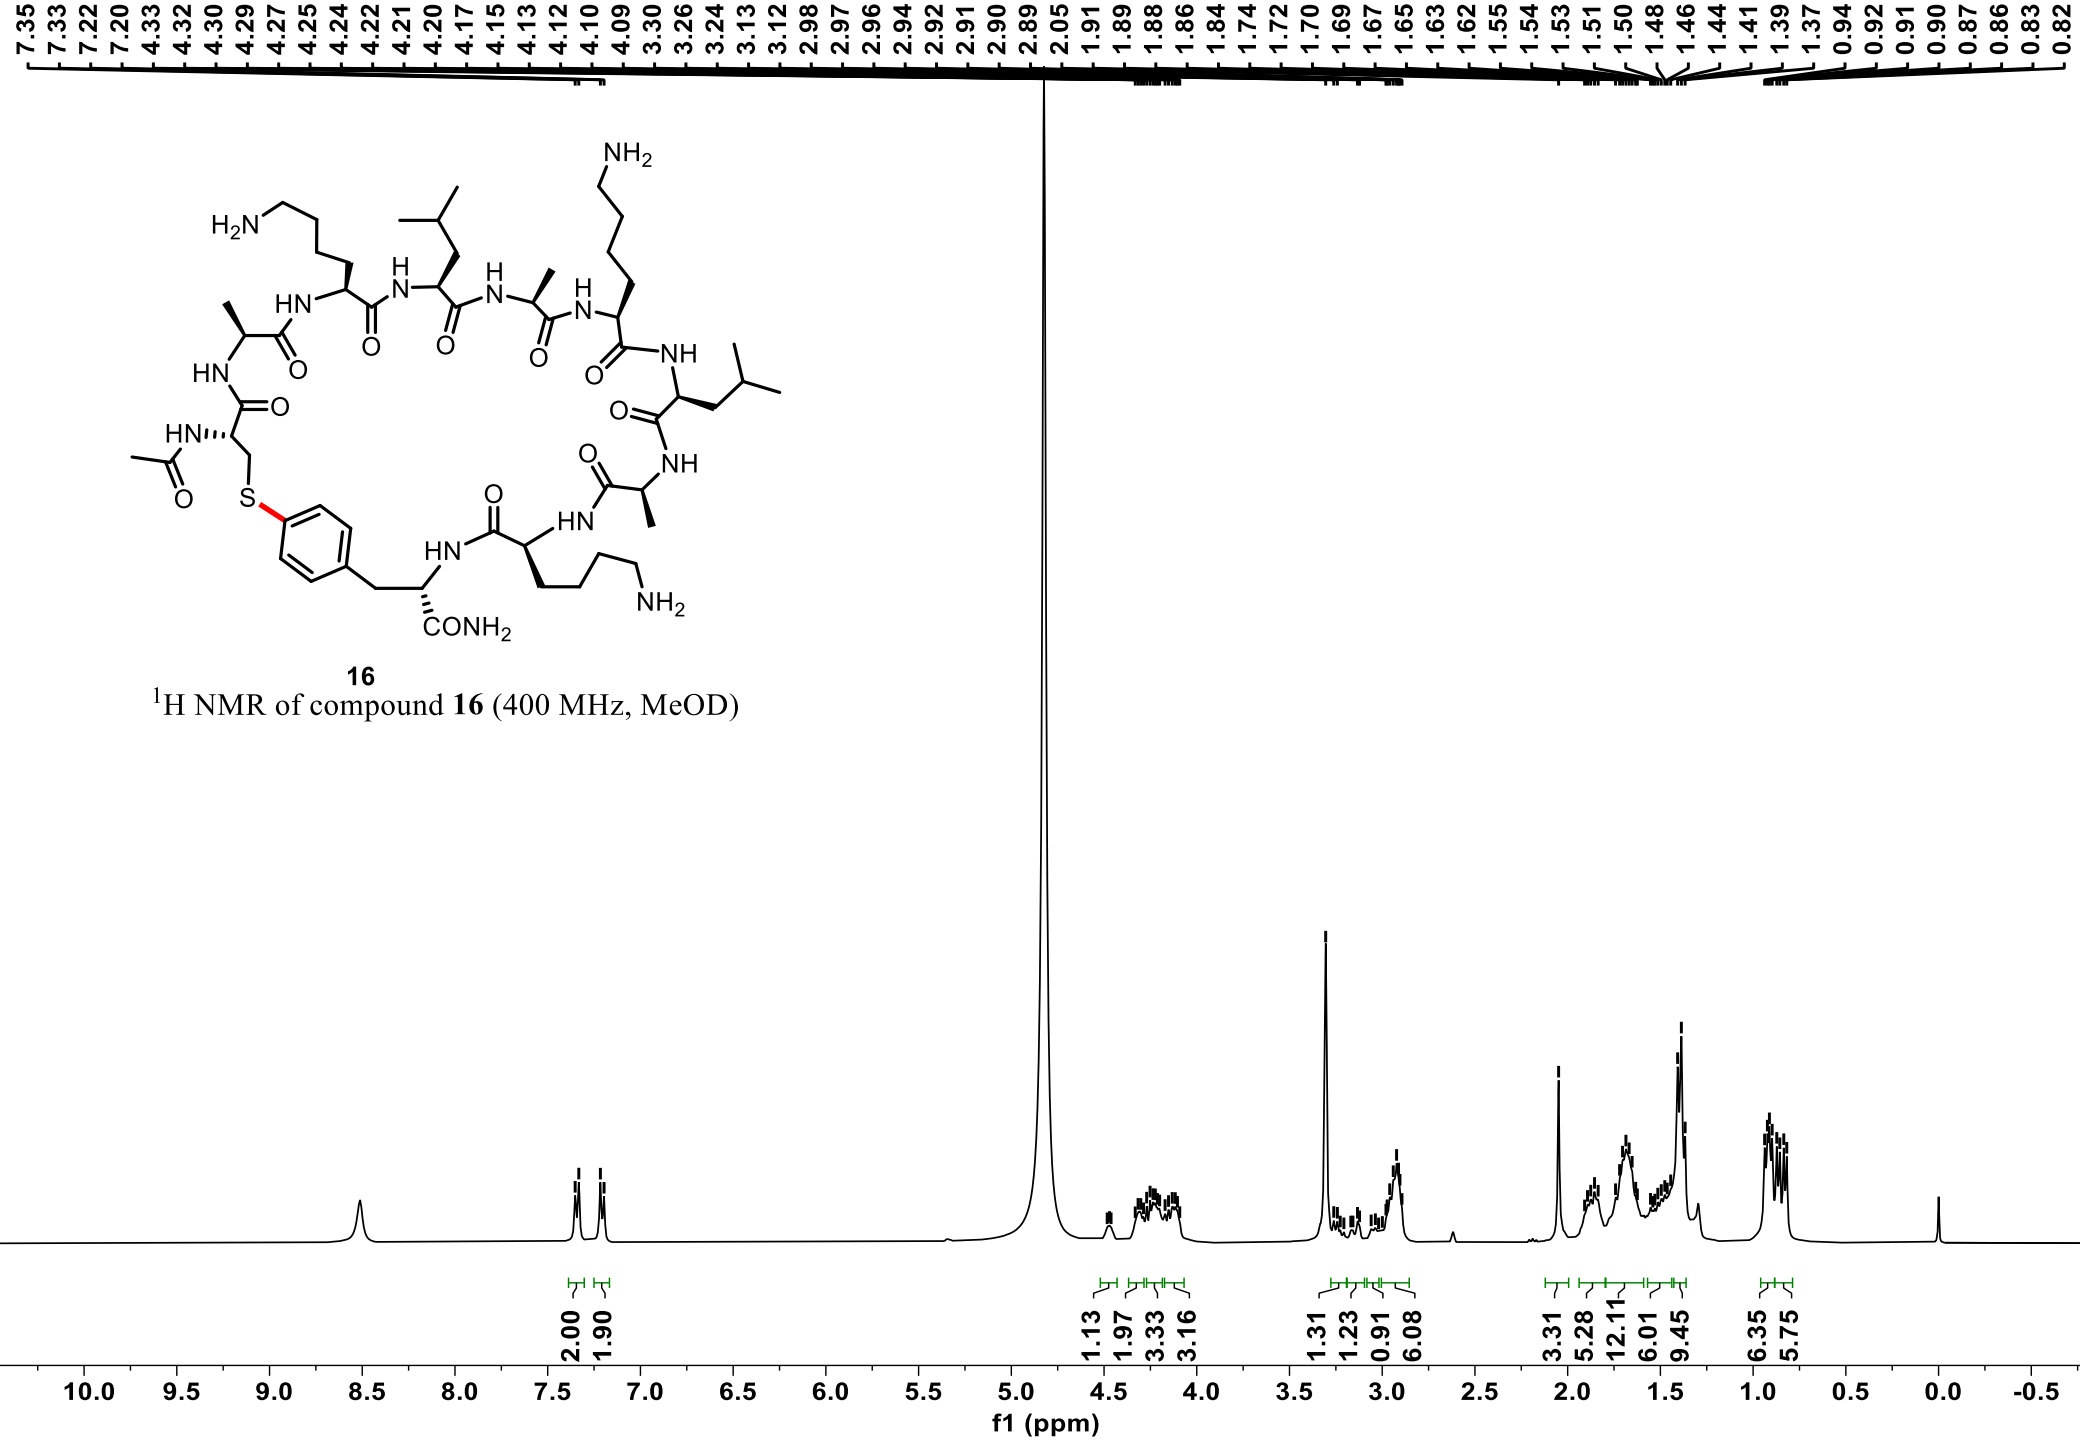

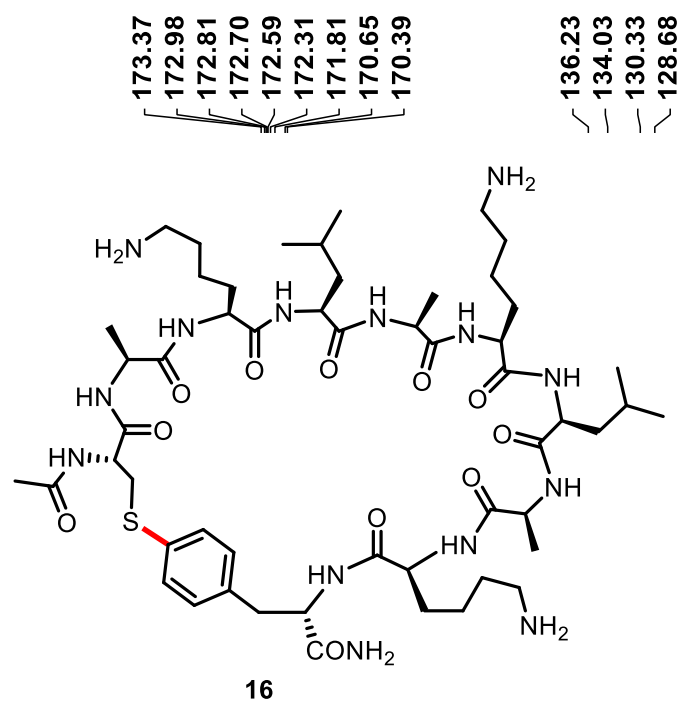

$^{13}\text{C}$  NMR of compound **16** (101 MHz, DMSO)

173.37  
172.98  
172.81  
172.70  
172.59  
172.31  
171.81  
170.65  
170.39

136.23  
134.03  
130.33  
128.68

79.75  
79.63  
79.42  
79.09

54.39  
53.68  
53.37  
53.09  
52.18  
49.28  
49.05

37.05  
35.68  
31.26  
30.81  
29.53  
27.21  
24.61  
23.42  
22.95  
22.60  
21.87  
21.78  
18.05  
17.71

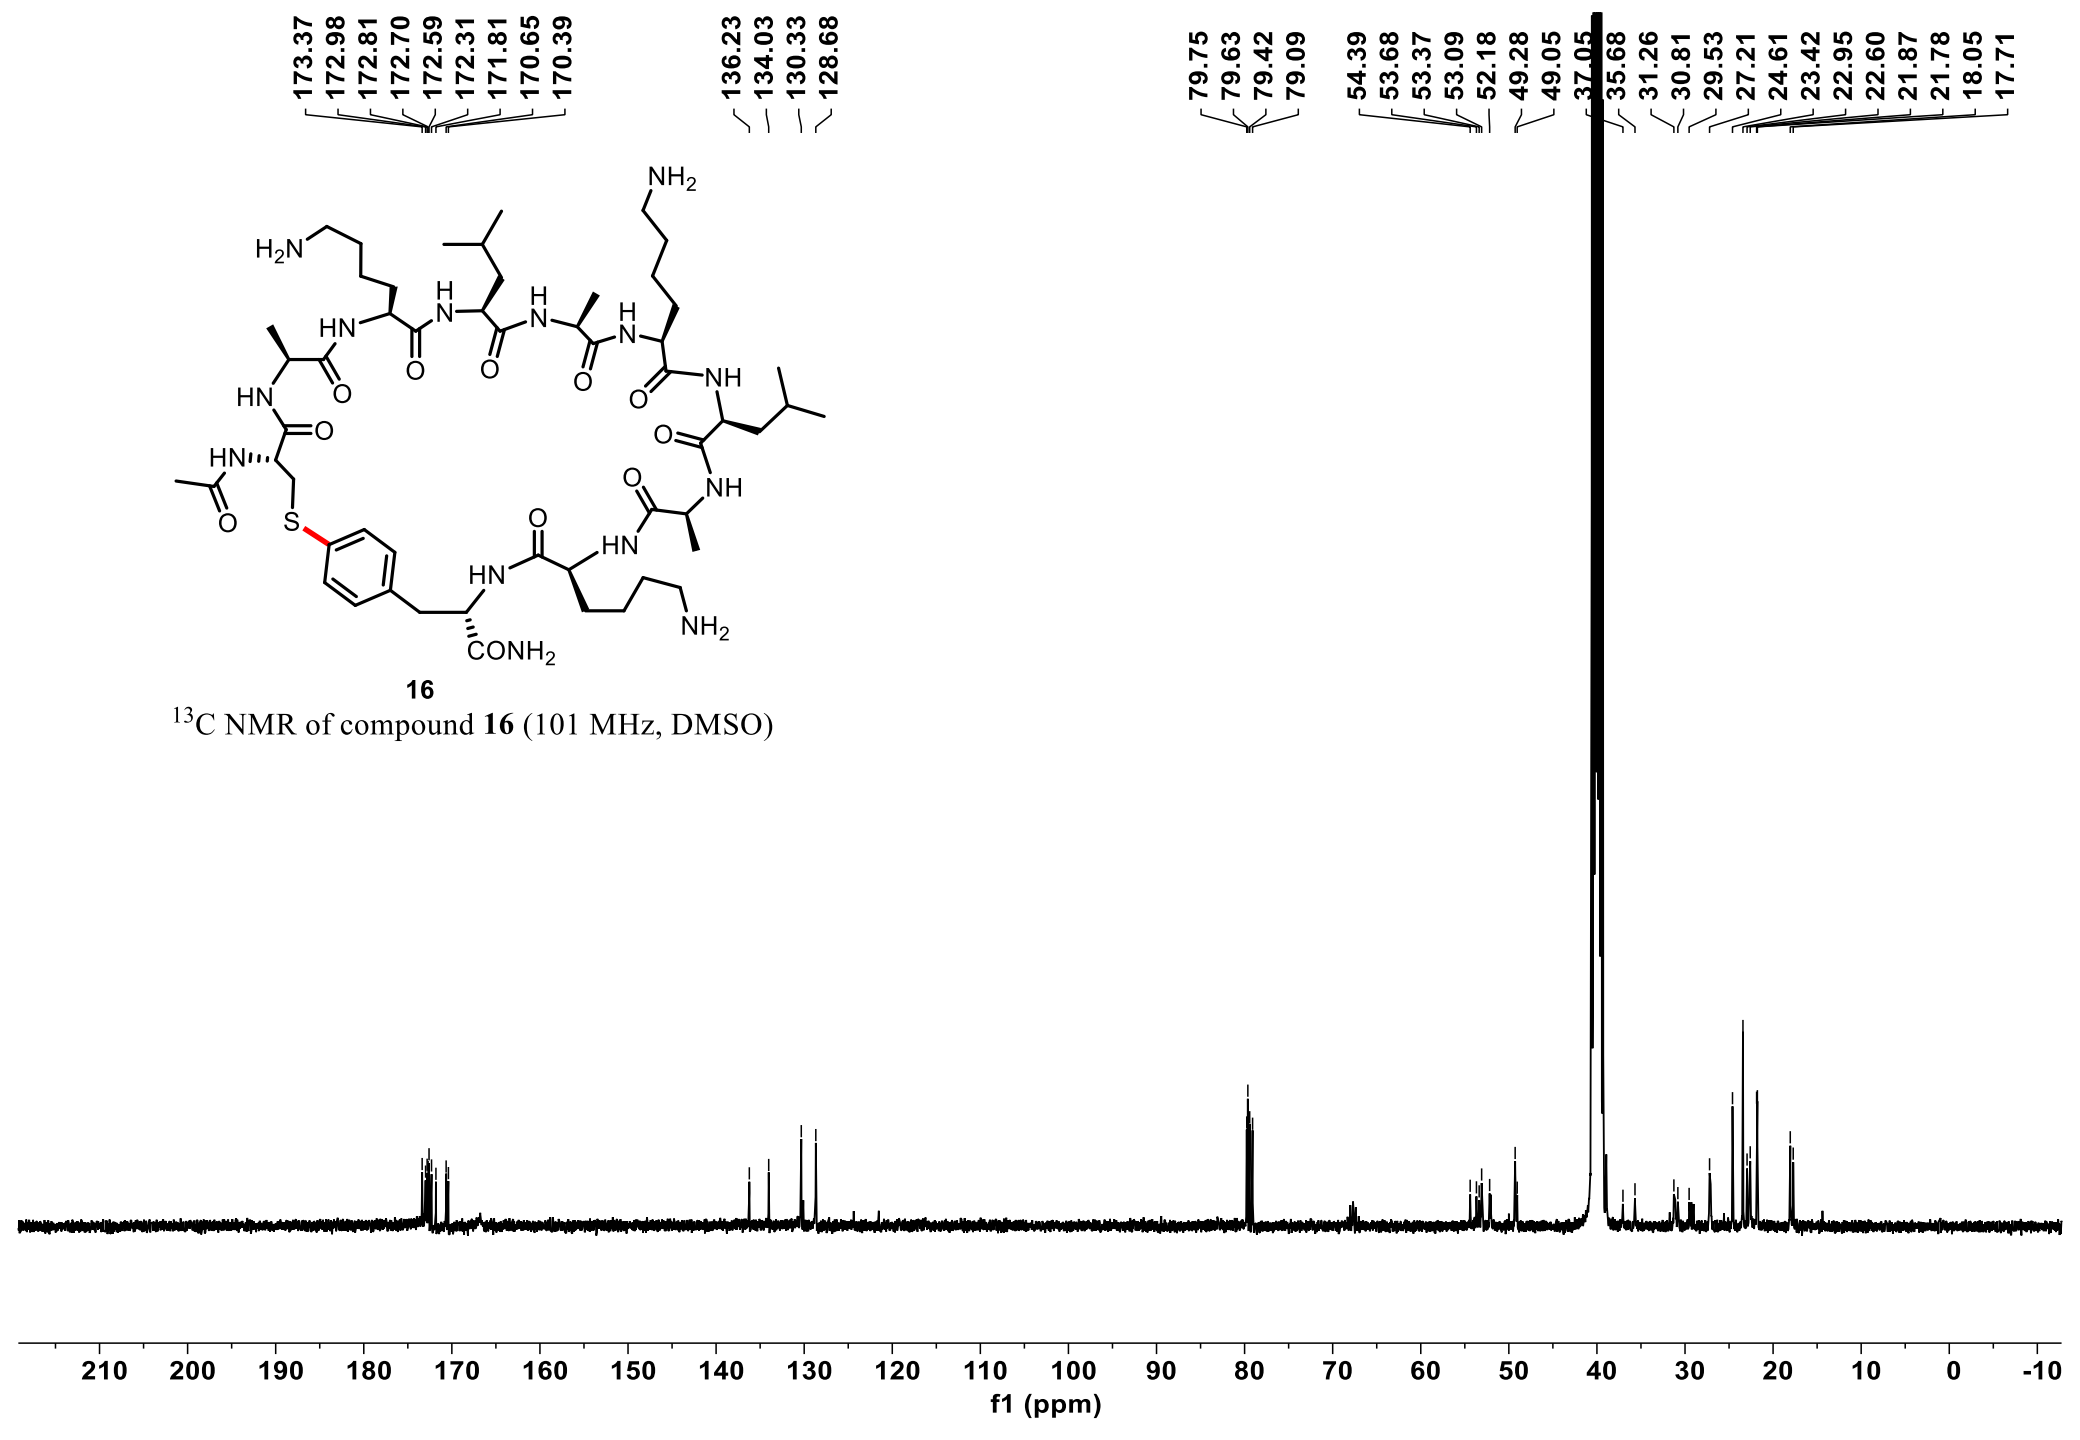



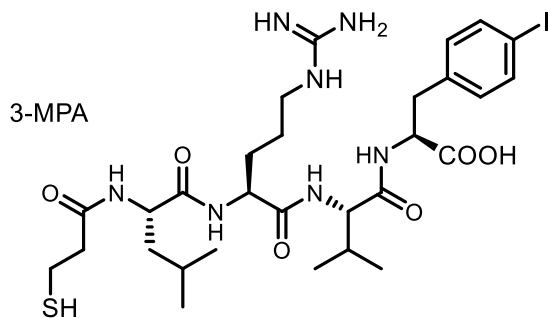

**S17**

$^1\text{H}$  NMR of compound **S17** (400 MHz, MeOD)

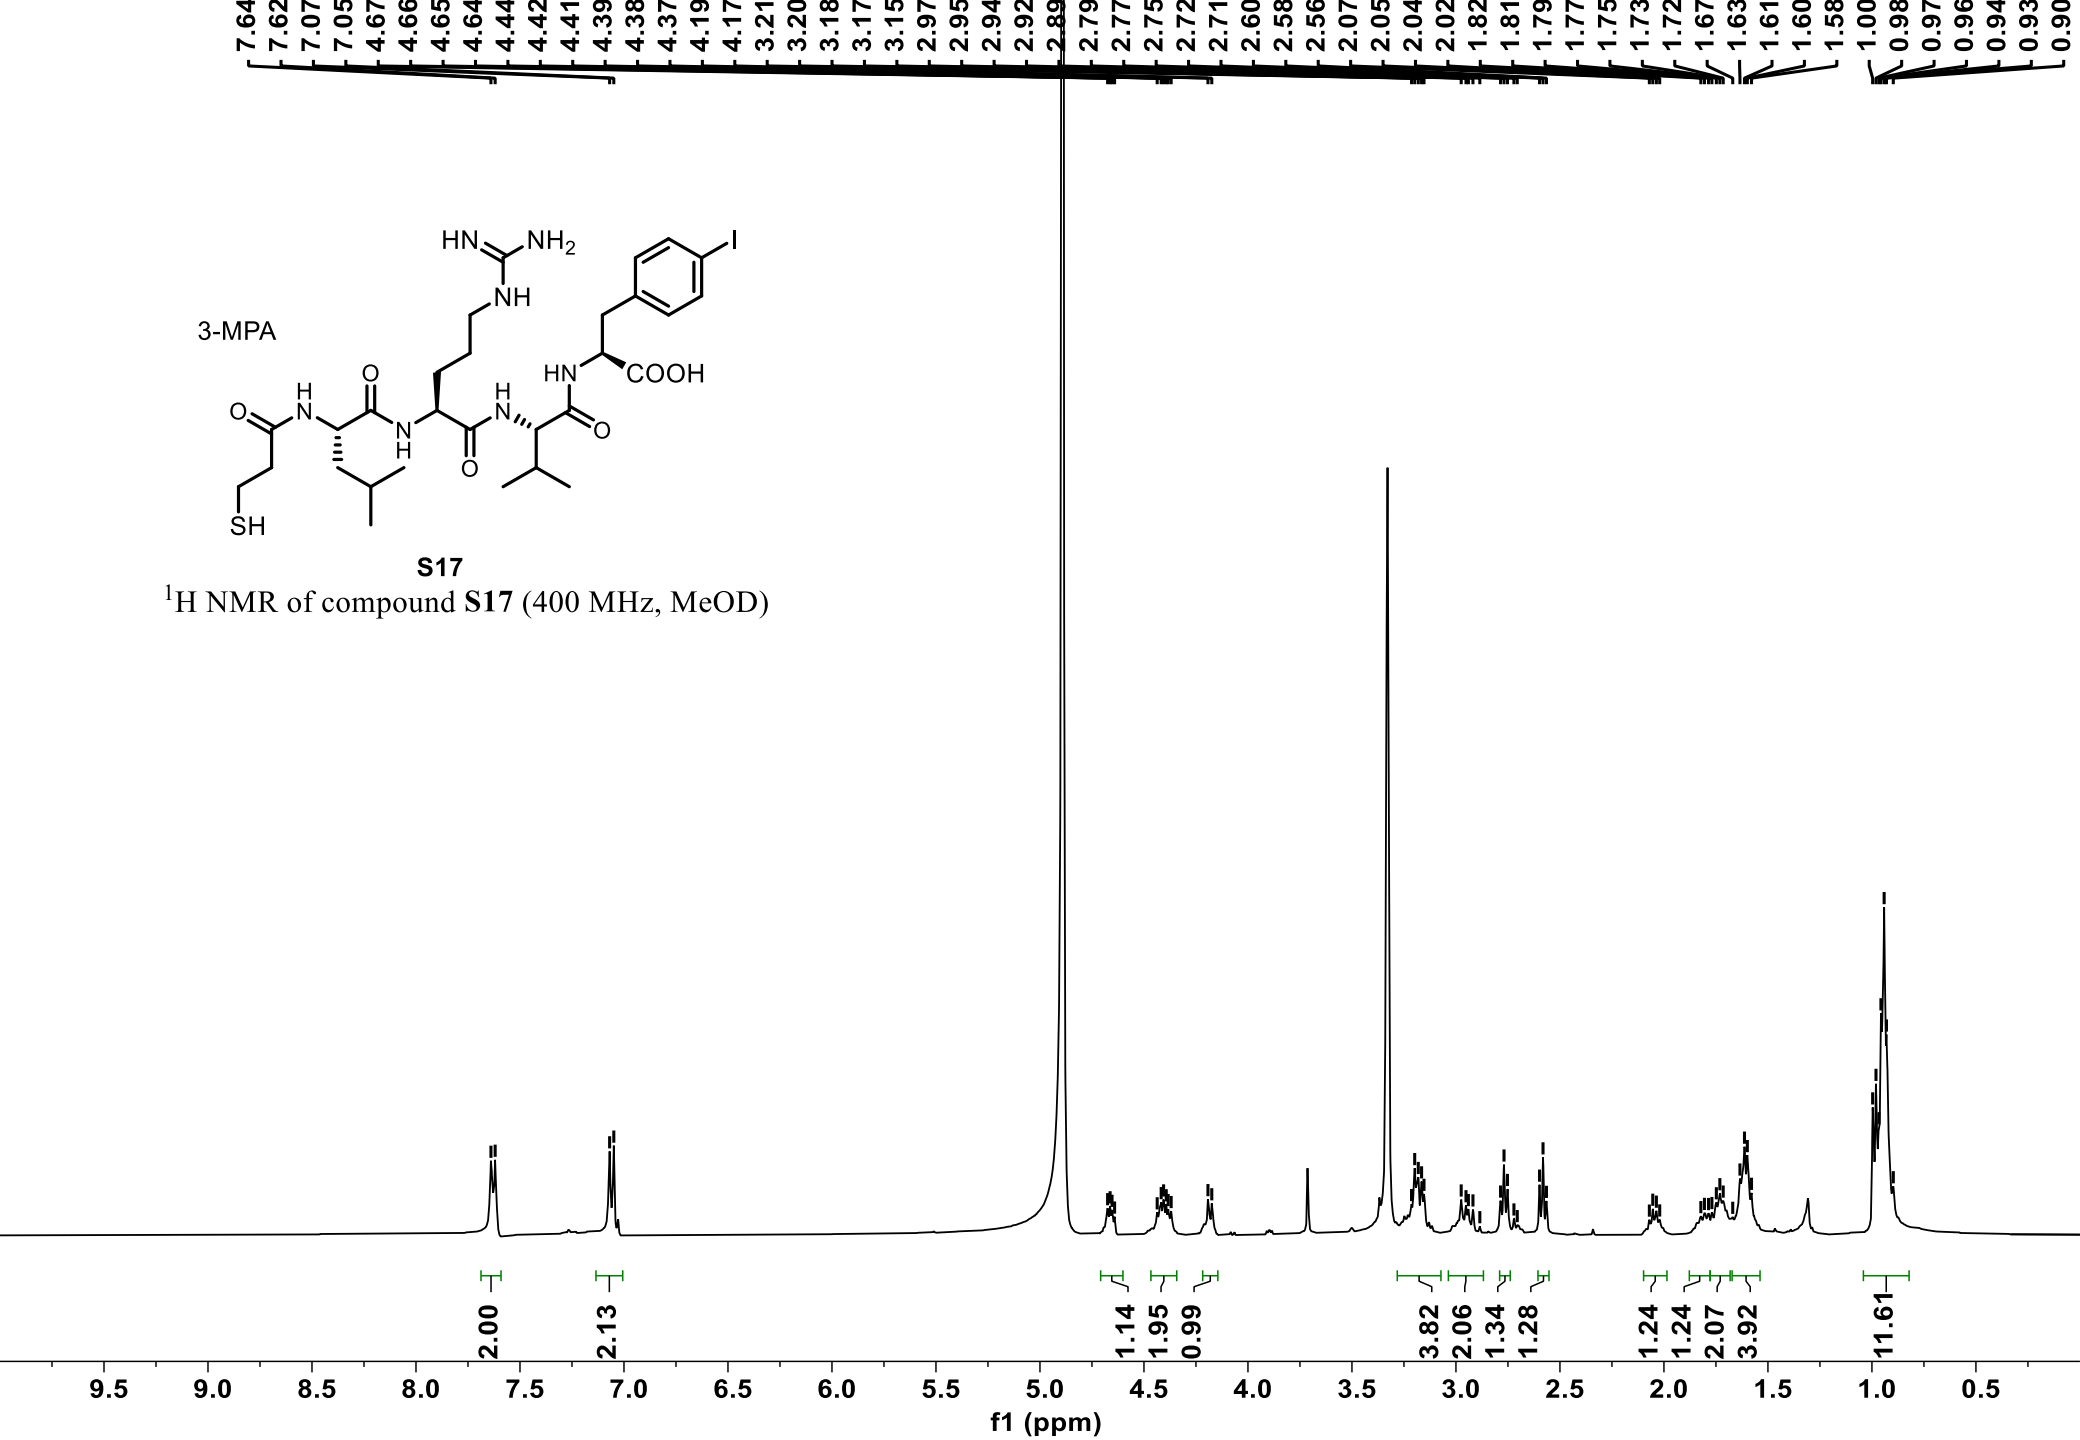

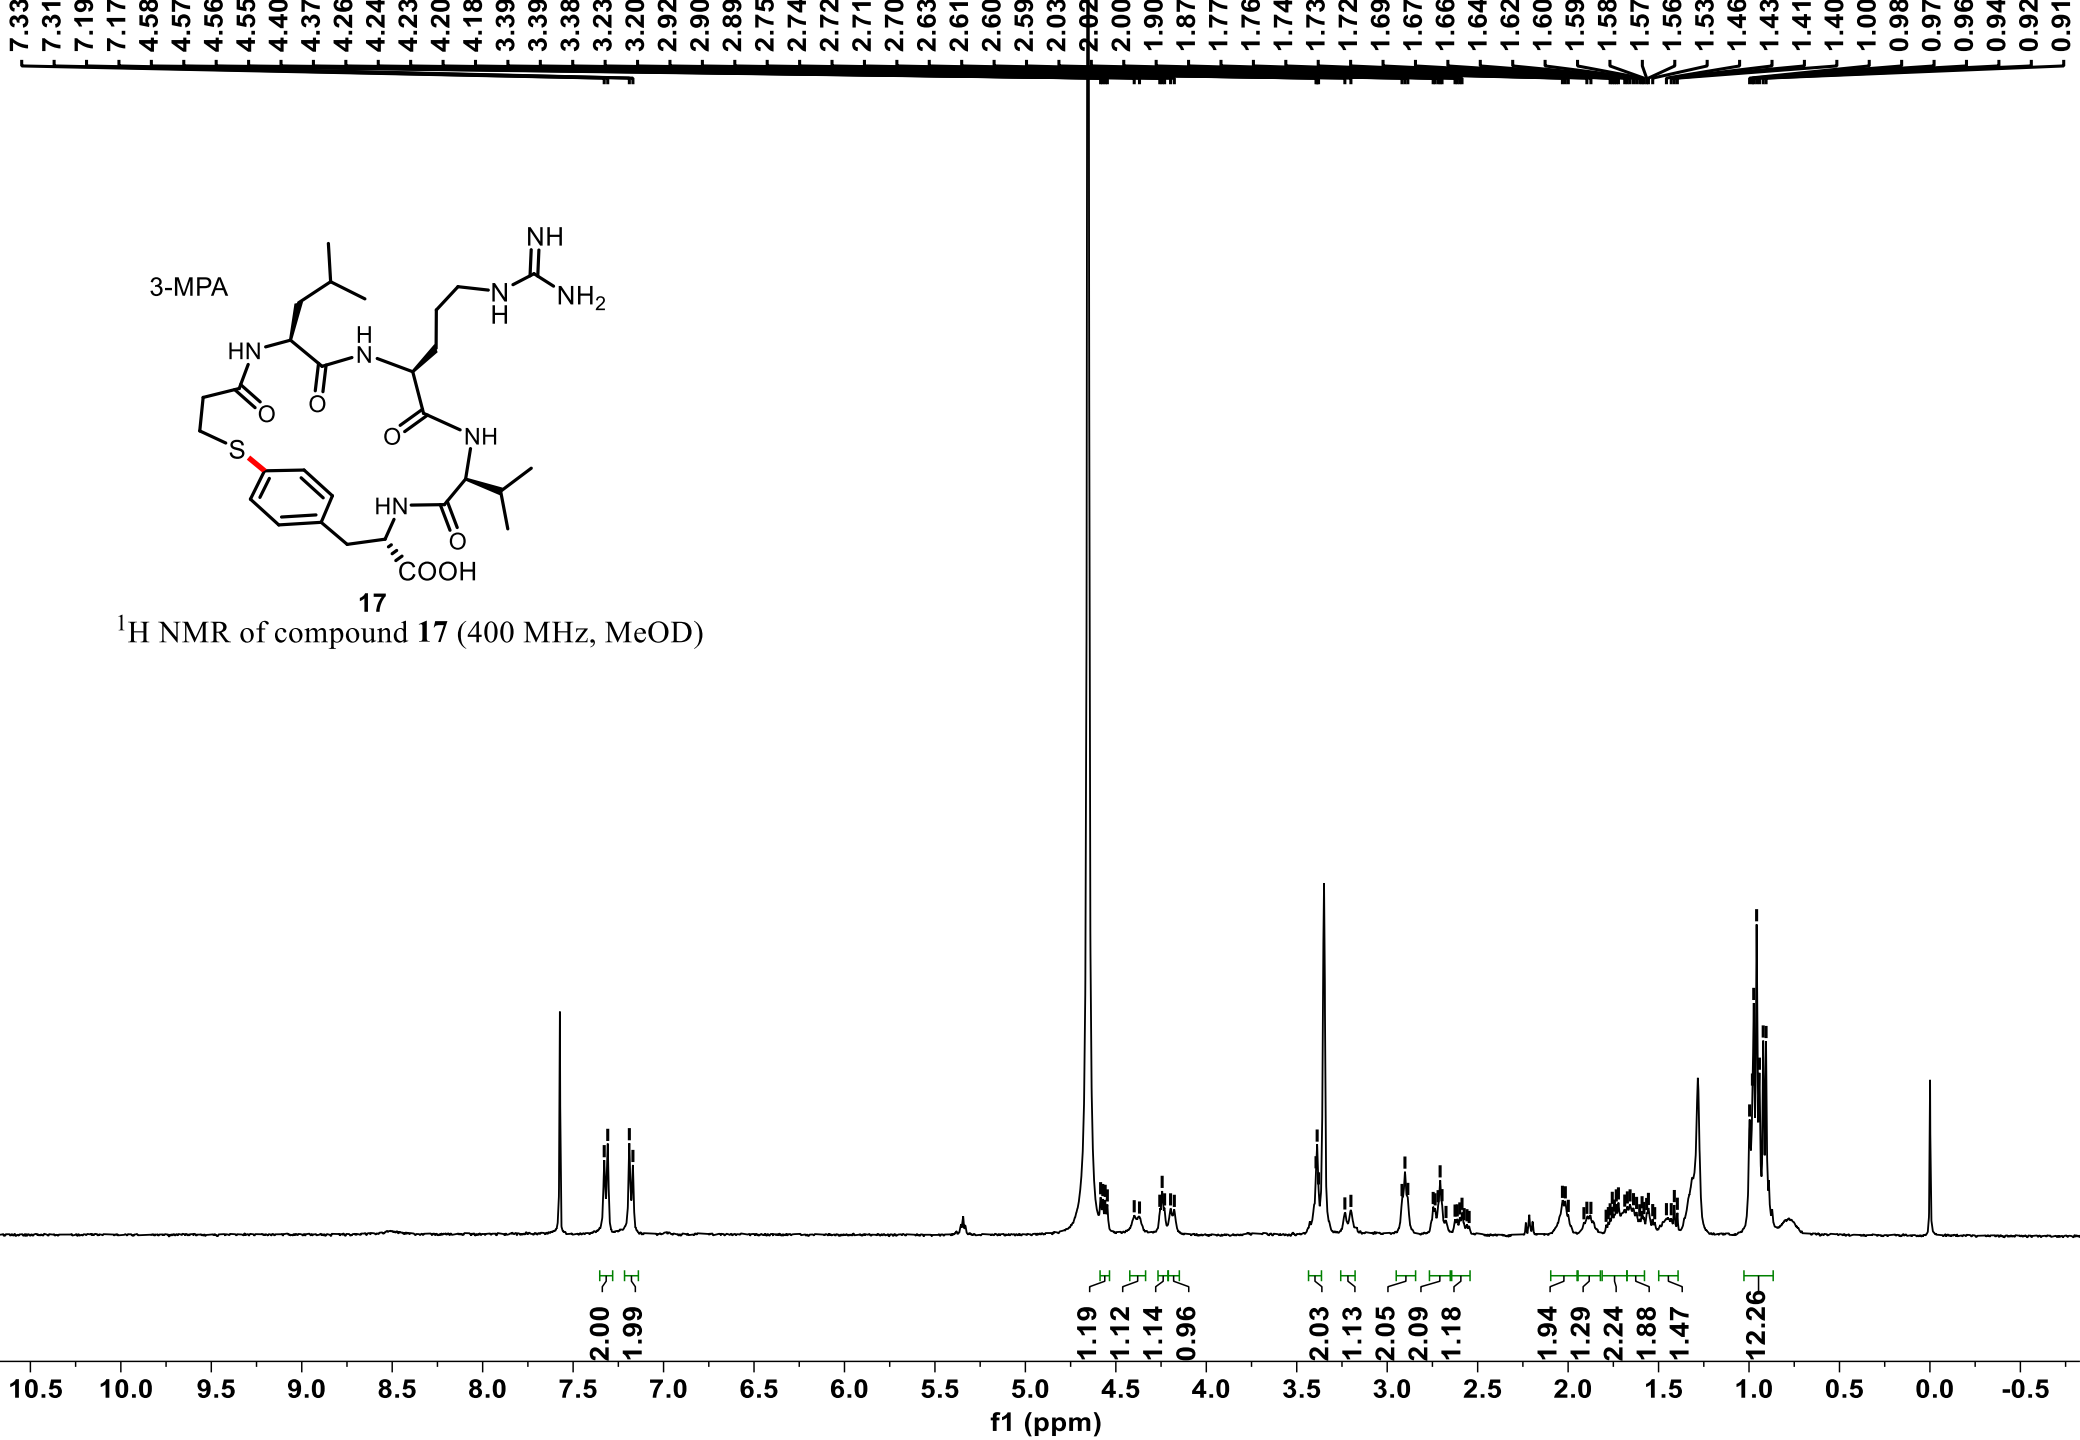

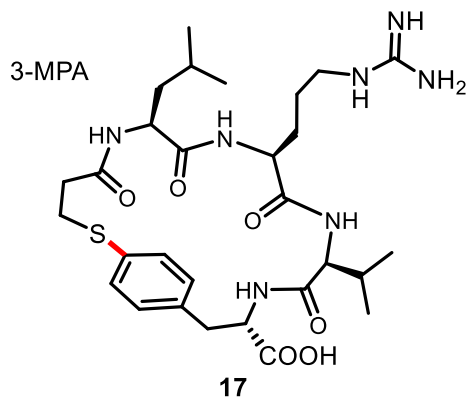

<sup>13</sup>C NMR of compound **17** (101 MHz, DMSO)

173.92  
171.95  
171.74  
171.70  
170.41

157.18

136.22  
133.80  
130.61  
129.33

59.61

51.42  
50.90

40.94

35.64  
30.15  
24.64  
23.45  
21.64  
19.56  
19.37

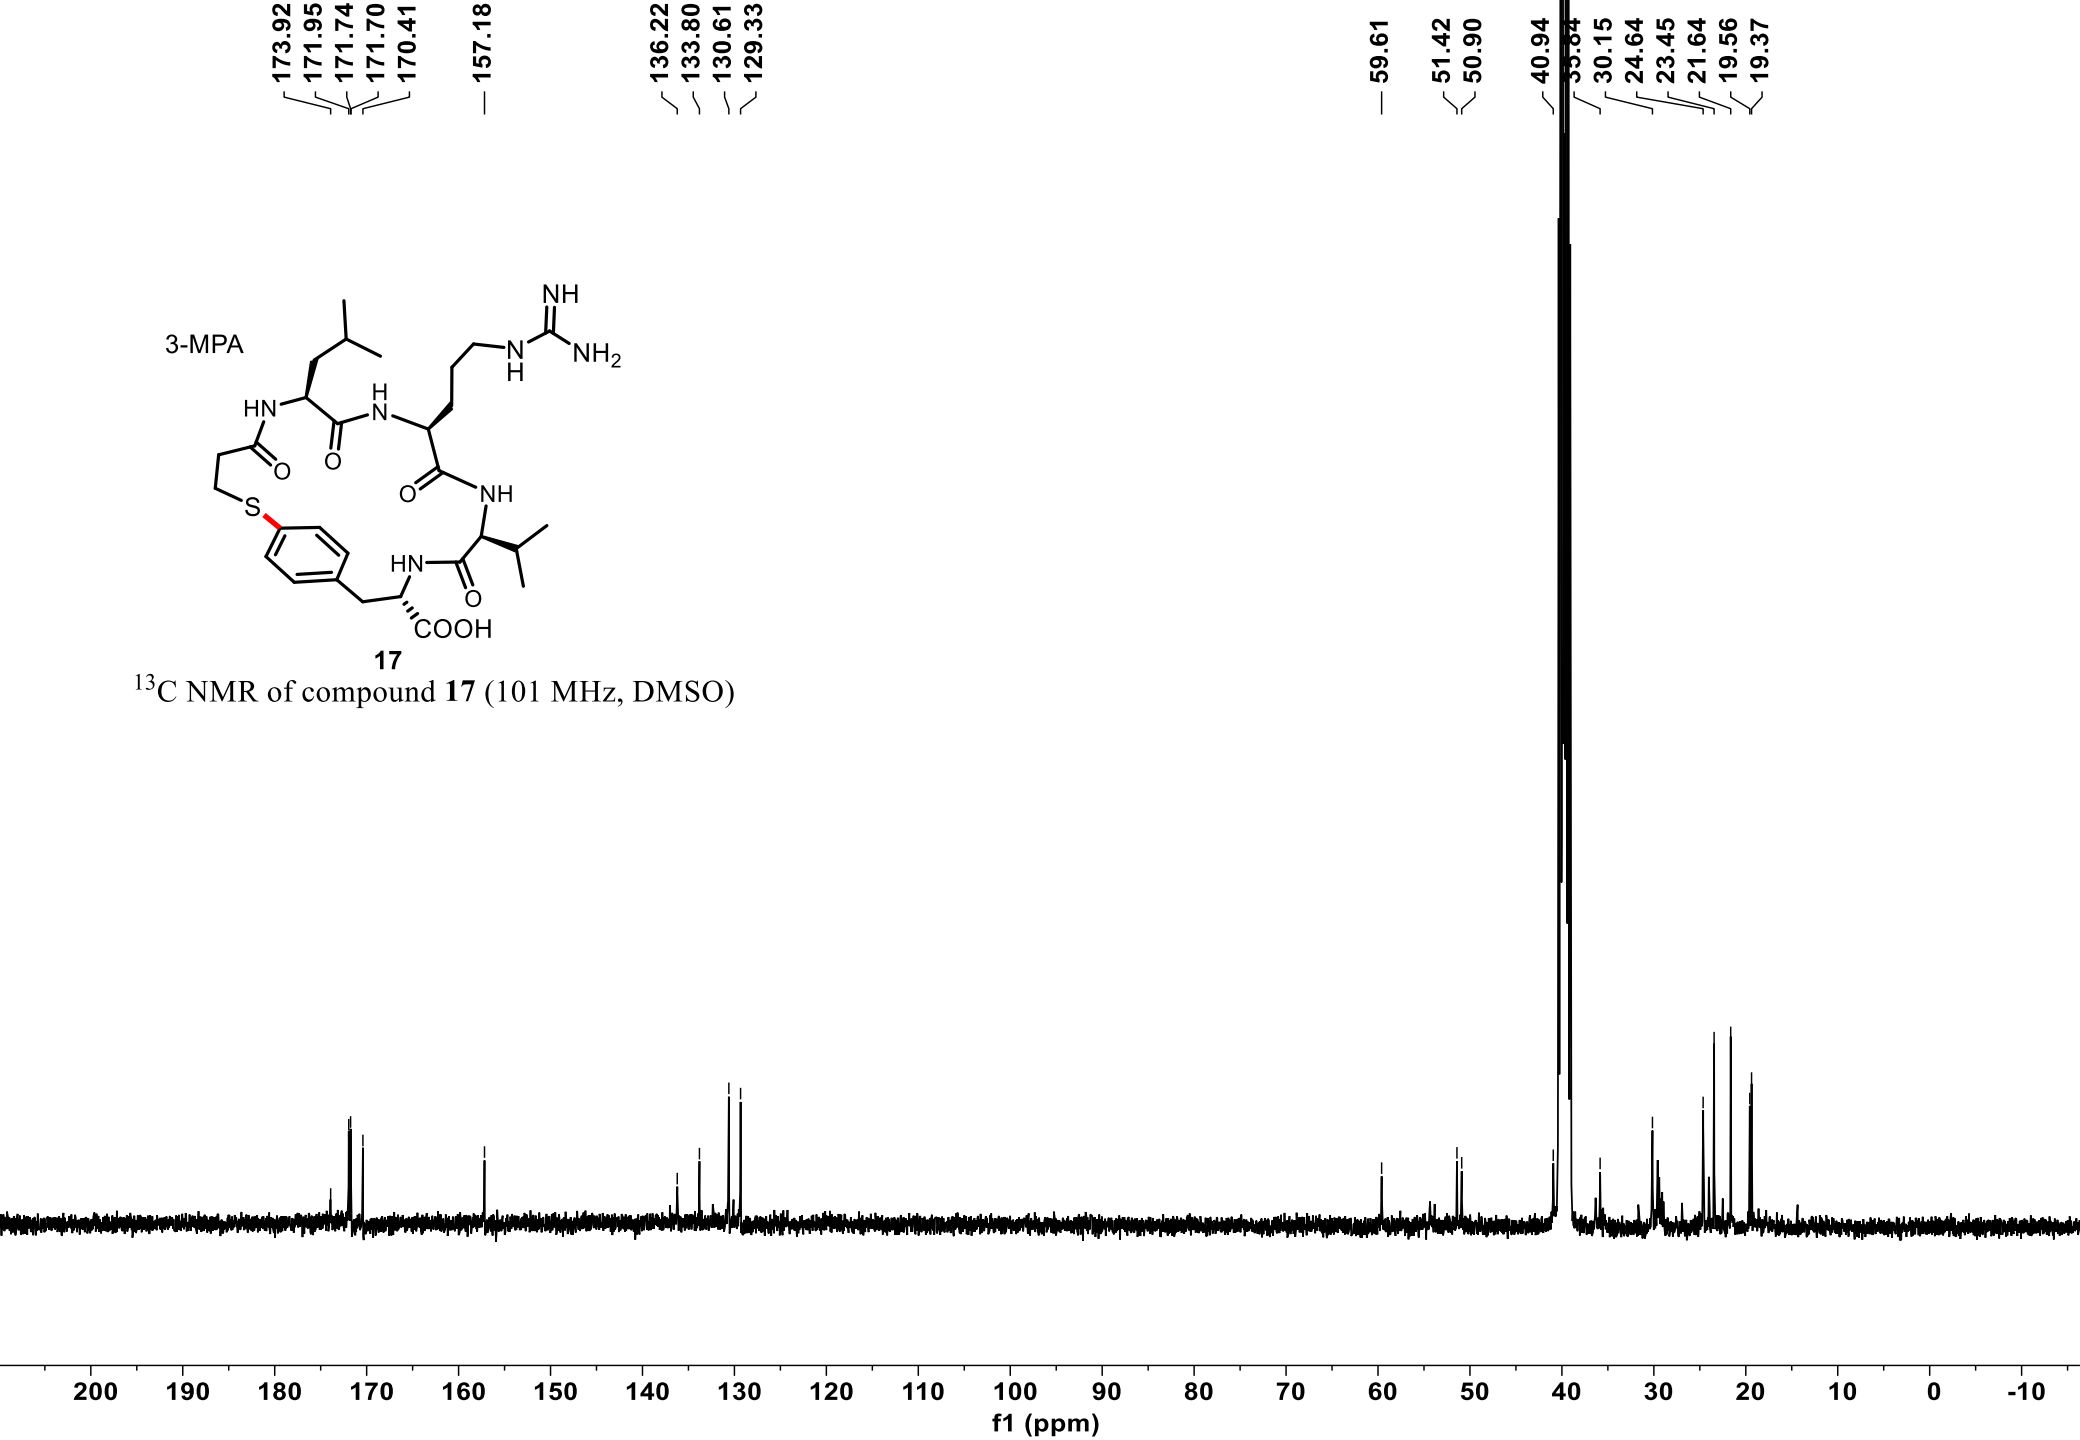

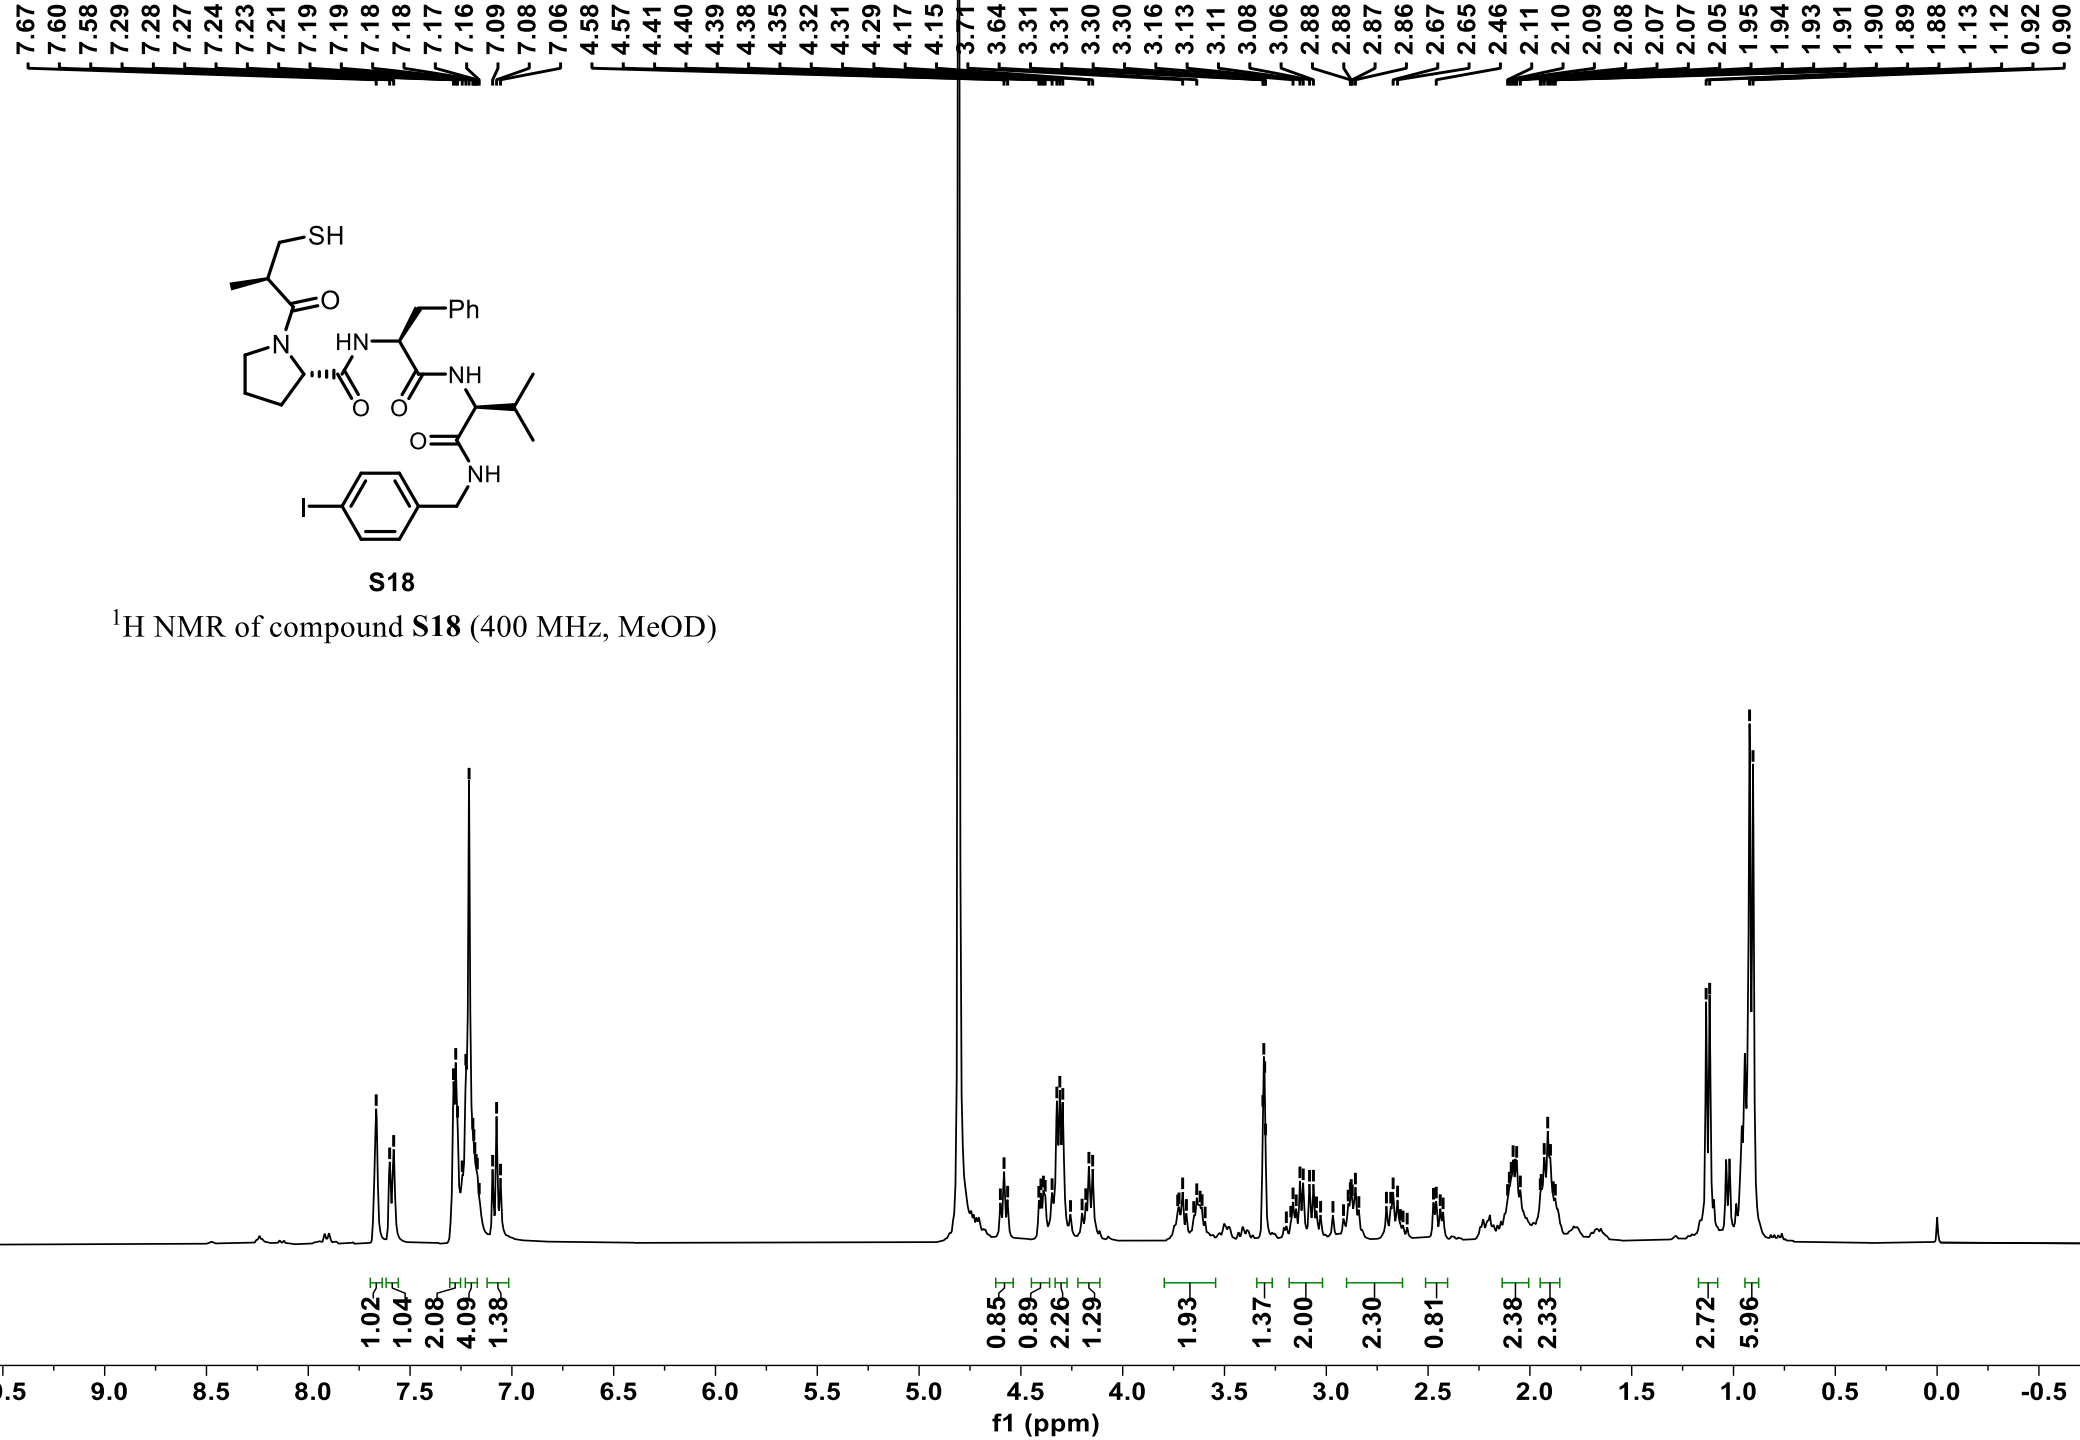

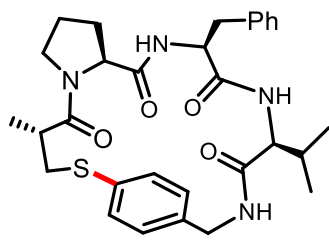

**18**

$^1\text{H}$  NMR of compound **18** (400 MHz, MeOD)

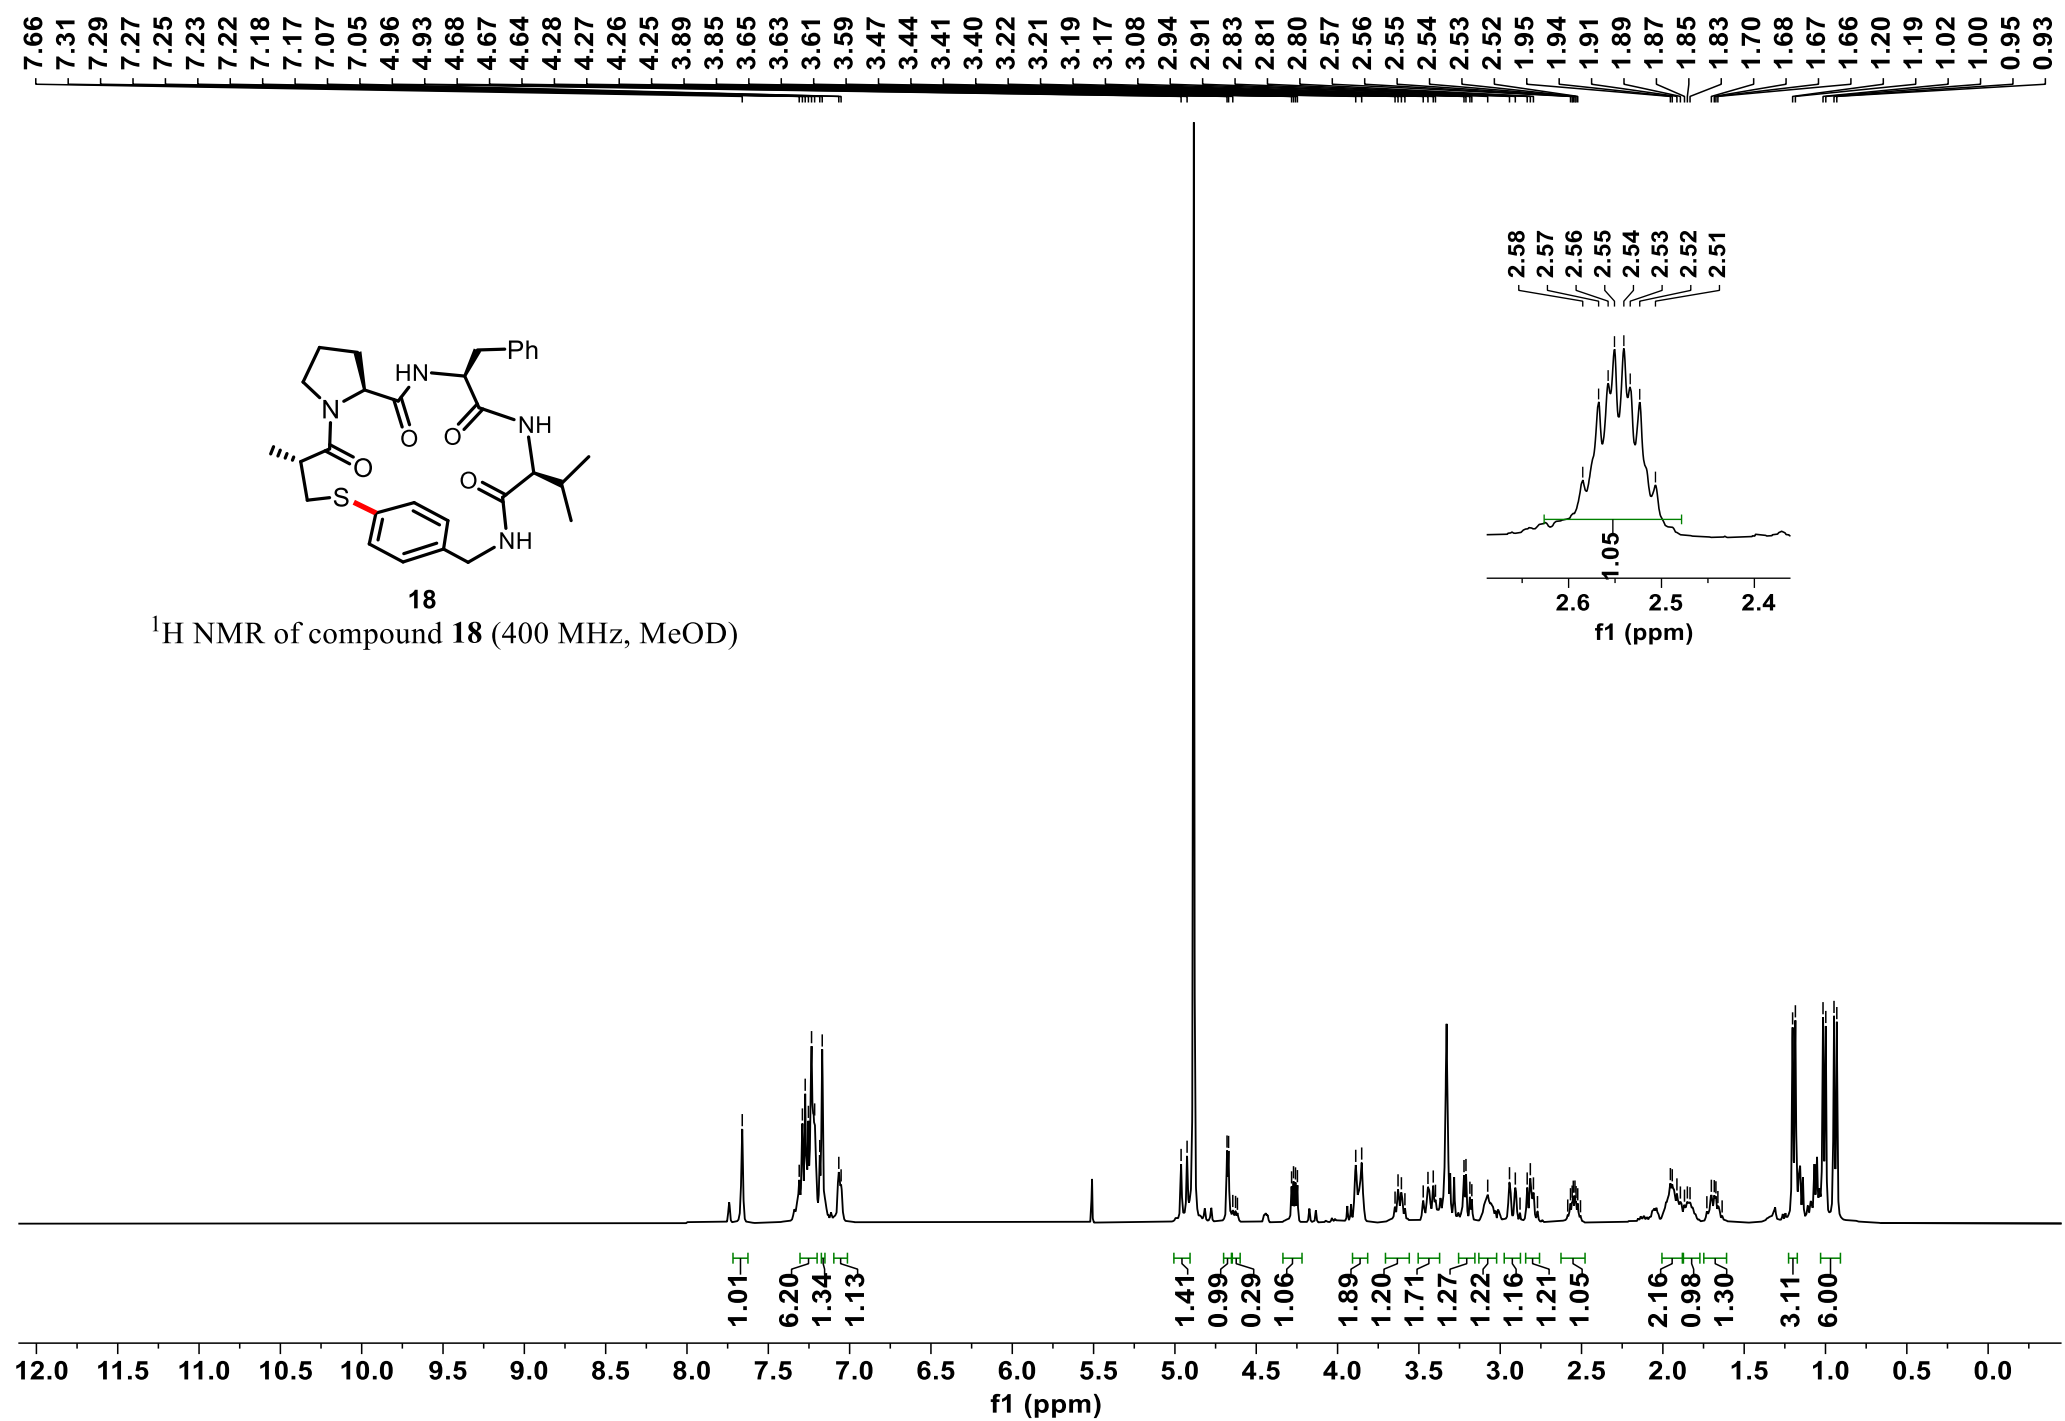

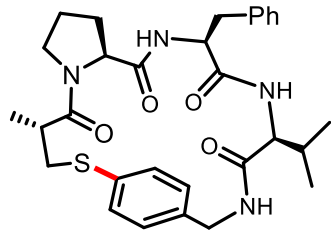

**18**

$^1\text{H}$  NMR of compound **18** (400 MHz, Acetone- $d_6$ )

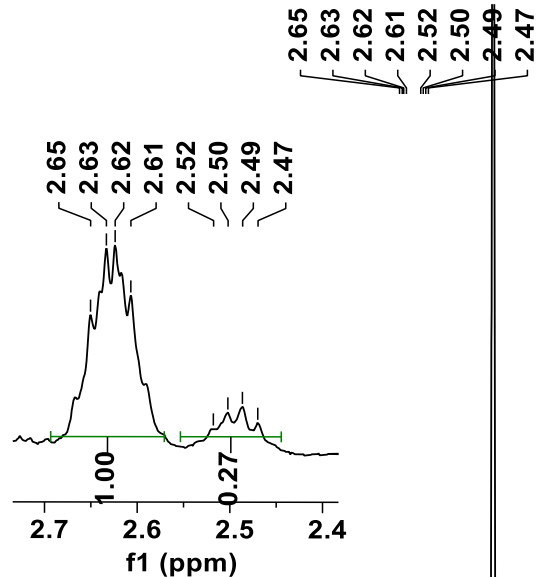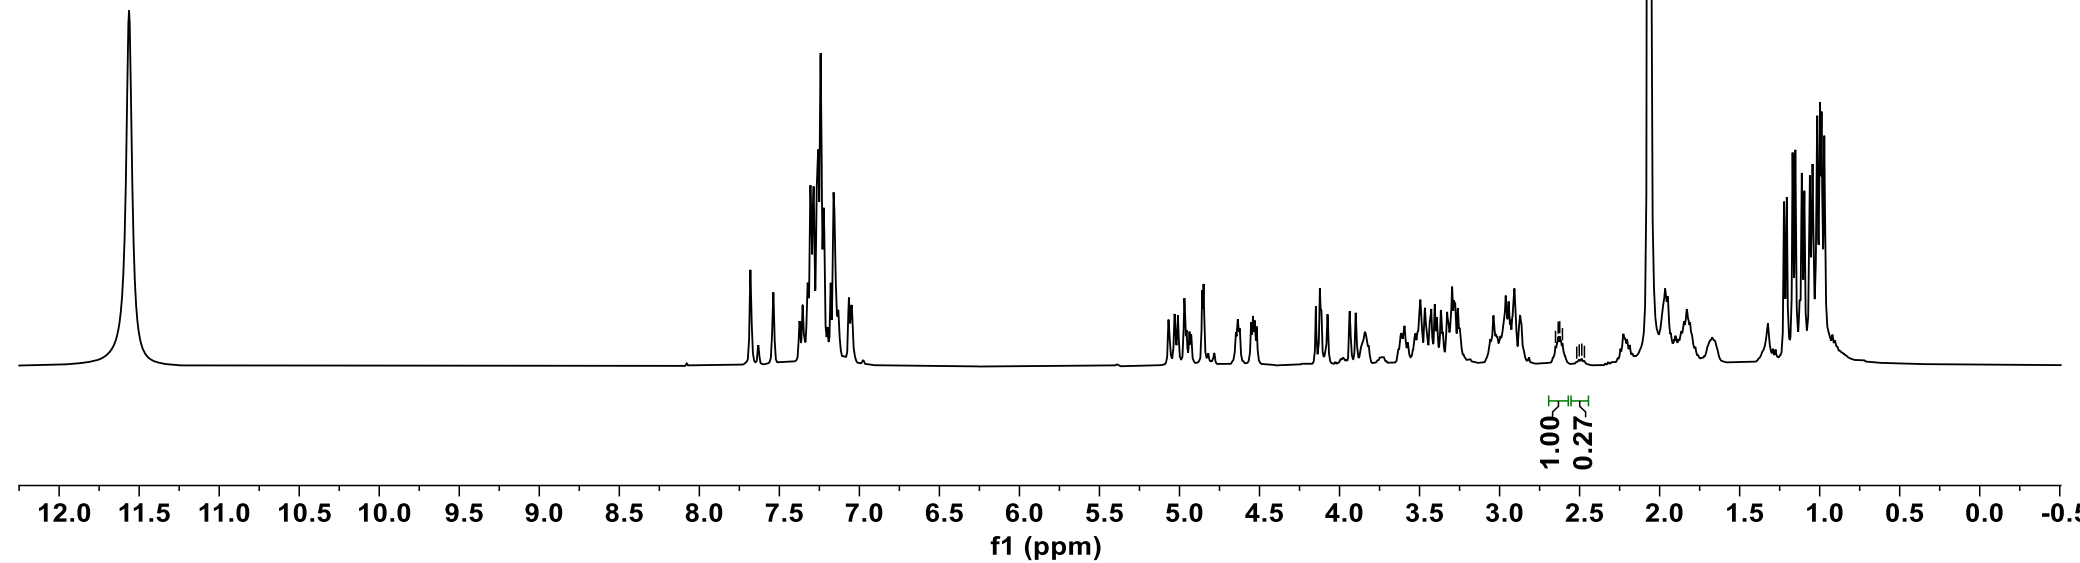

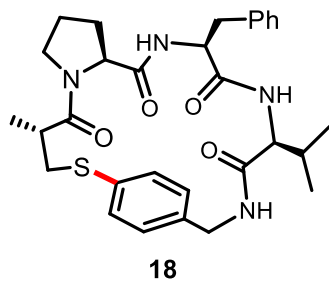

$^{13}\text{C}$  NMR of compound **18** (101 MHz, Acetone- $d_6$ )

175.50  
173.00  
172.92  
172.31  
172.23  
170.95  
170.88

140.02  
138.90  
135.73  
135.68  
131.04  
129.62  
129.32  
129.28  
129.18  
128.81  
127.38  
127.18  
127.14

63.10  
63.07  
58.22  
58.16  
58.07  
57.99  
48.48  
43.54  
43.43  
40.72  
36.69  
36.64  
36.58

25.39  
20.24  
18.37  
17.55

210 200 190 180 170 160 150 140 130 120 110 100 90 80 70 60 50 40 30 20 10 0

f1 (ppm)

7.75  
7.72  
7.63  
7.61  
7.59  
7.59  
7.42  
7.41  
7.41  
7.40  
7.40  
6.95  
6.93  
6.86  
6.82

4.98  
4.84  
4.82  
4.82  
4.80  
4.67  
4.66  
4.64  
4.62  
4.61  
4.60  
4.59  
4.58  
— 3.73  
3.15  
3.14  
3.12  
3.10  
3.01  
3.00  
2.98  
2.96

1.81  
1.76  
1.74  
1.73  
1.72  
1.70  
1.59  
1.58  
1.57  
1.56  
1.54  
1.44  
1.37  
1.35  
1.00  
0.99  
0.97  
0.95

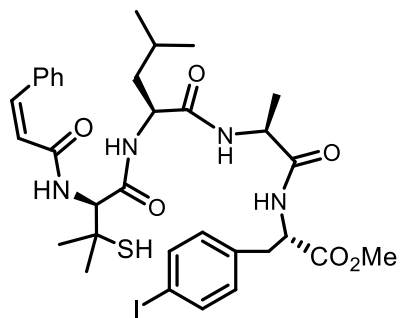

**S19**

<sup>1</sup>H NMR of compound **S19** (400 MHz, Acetic Acid-*d*<sub>4</sub>)

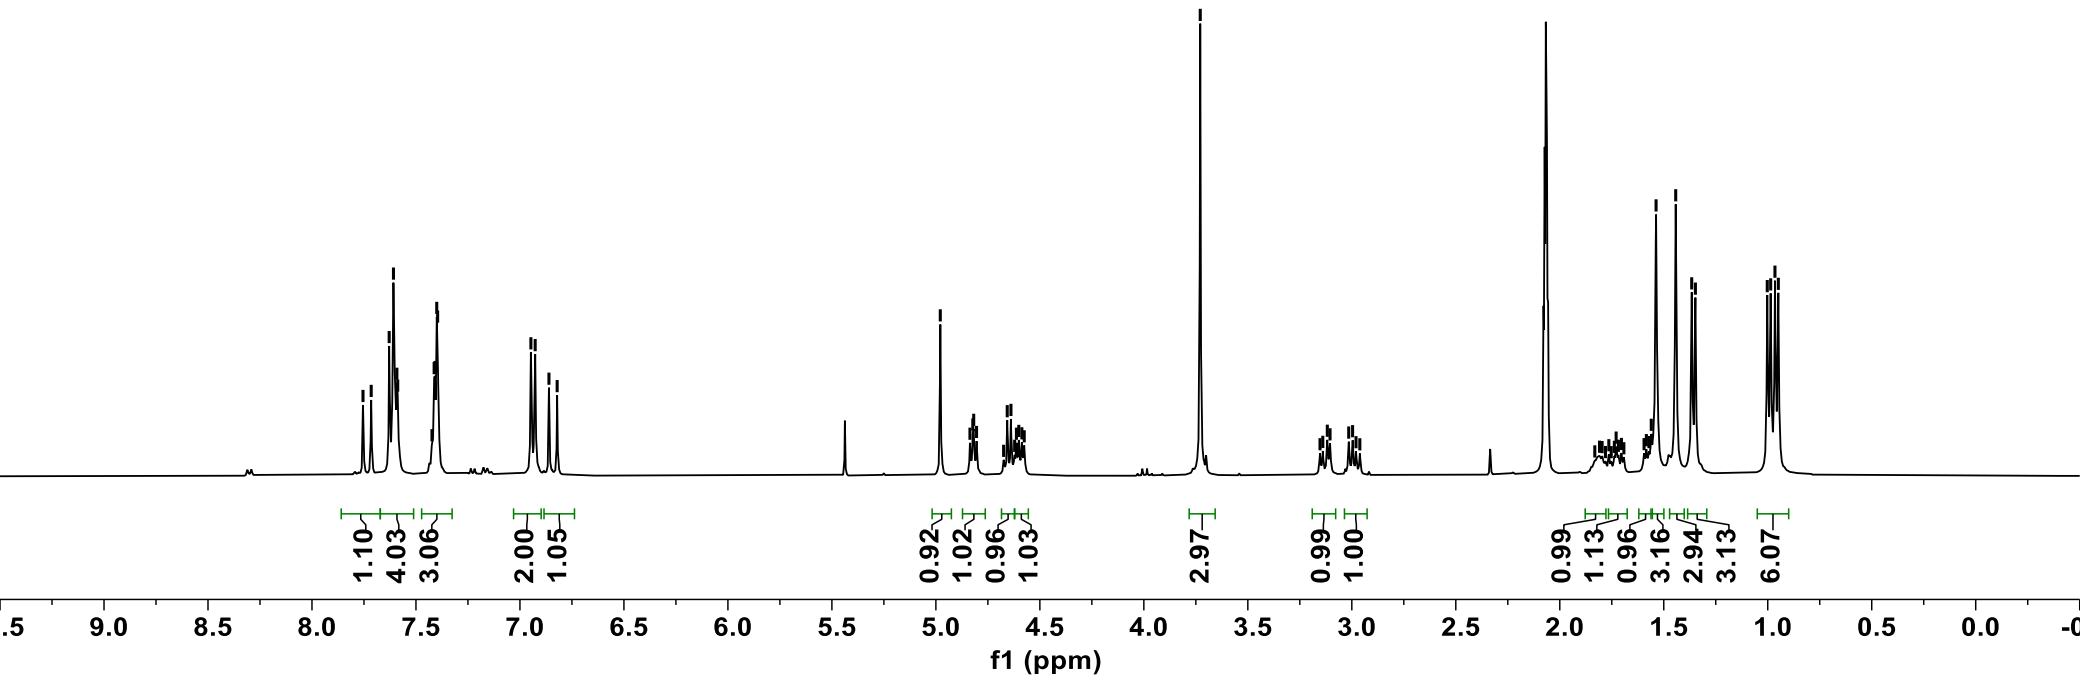



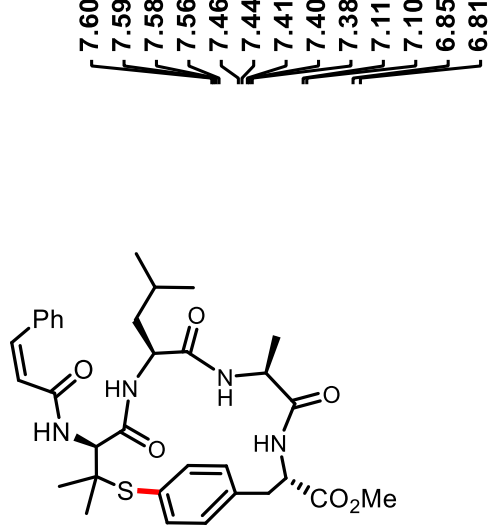

**19**

<sup>1</sup>H NMR of compound **19** (400 MHz, MeOD)

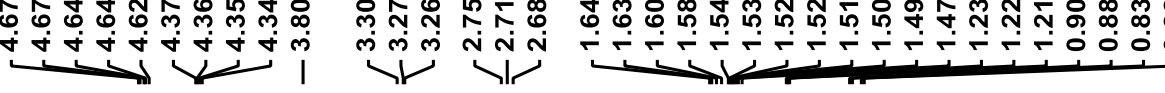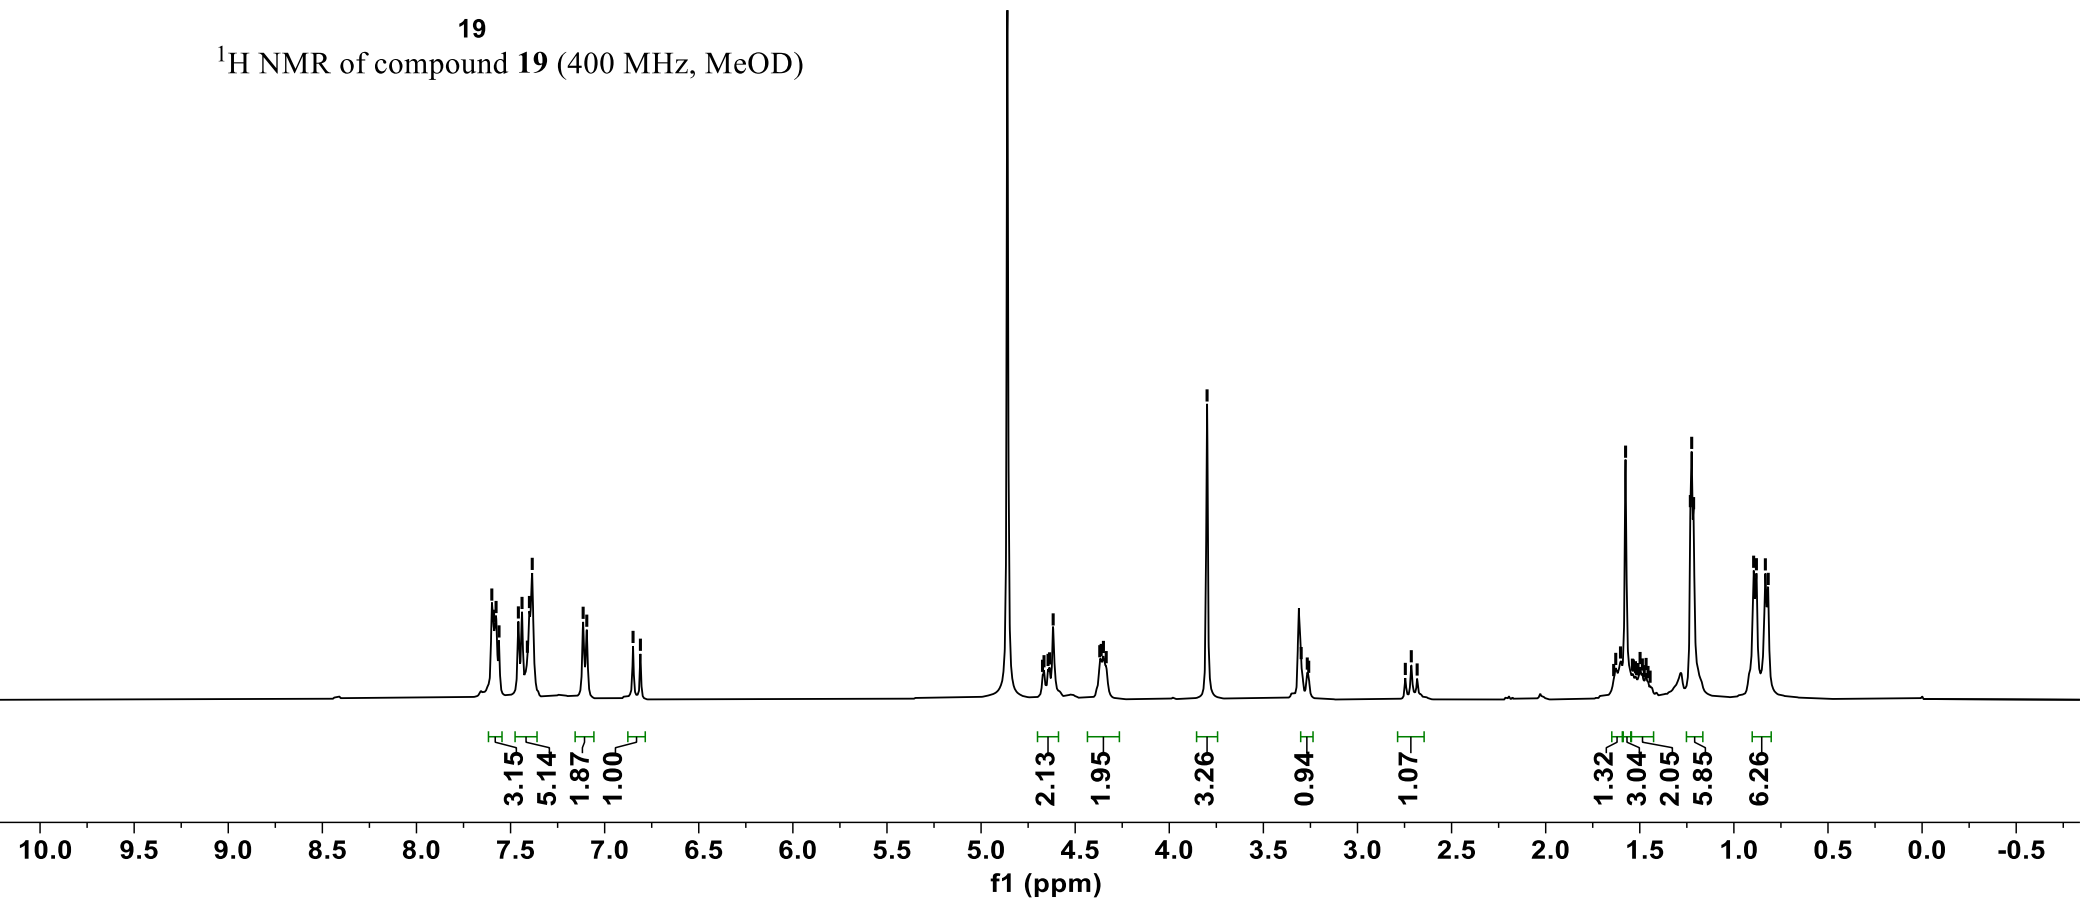



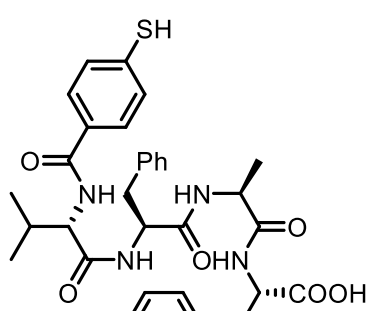

**S20**

$^1\text{H}$  NMR of compound **S20** (400 MHz, MeOD)

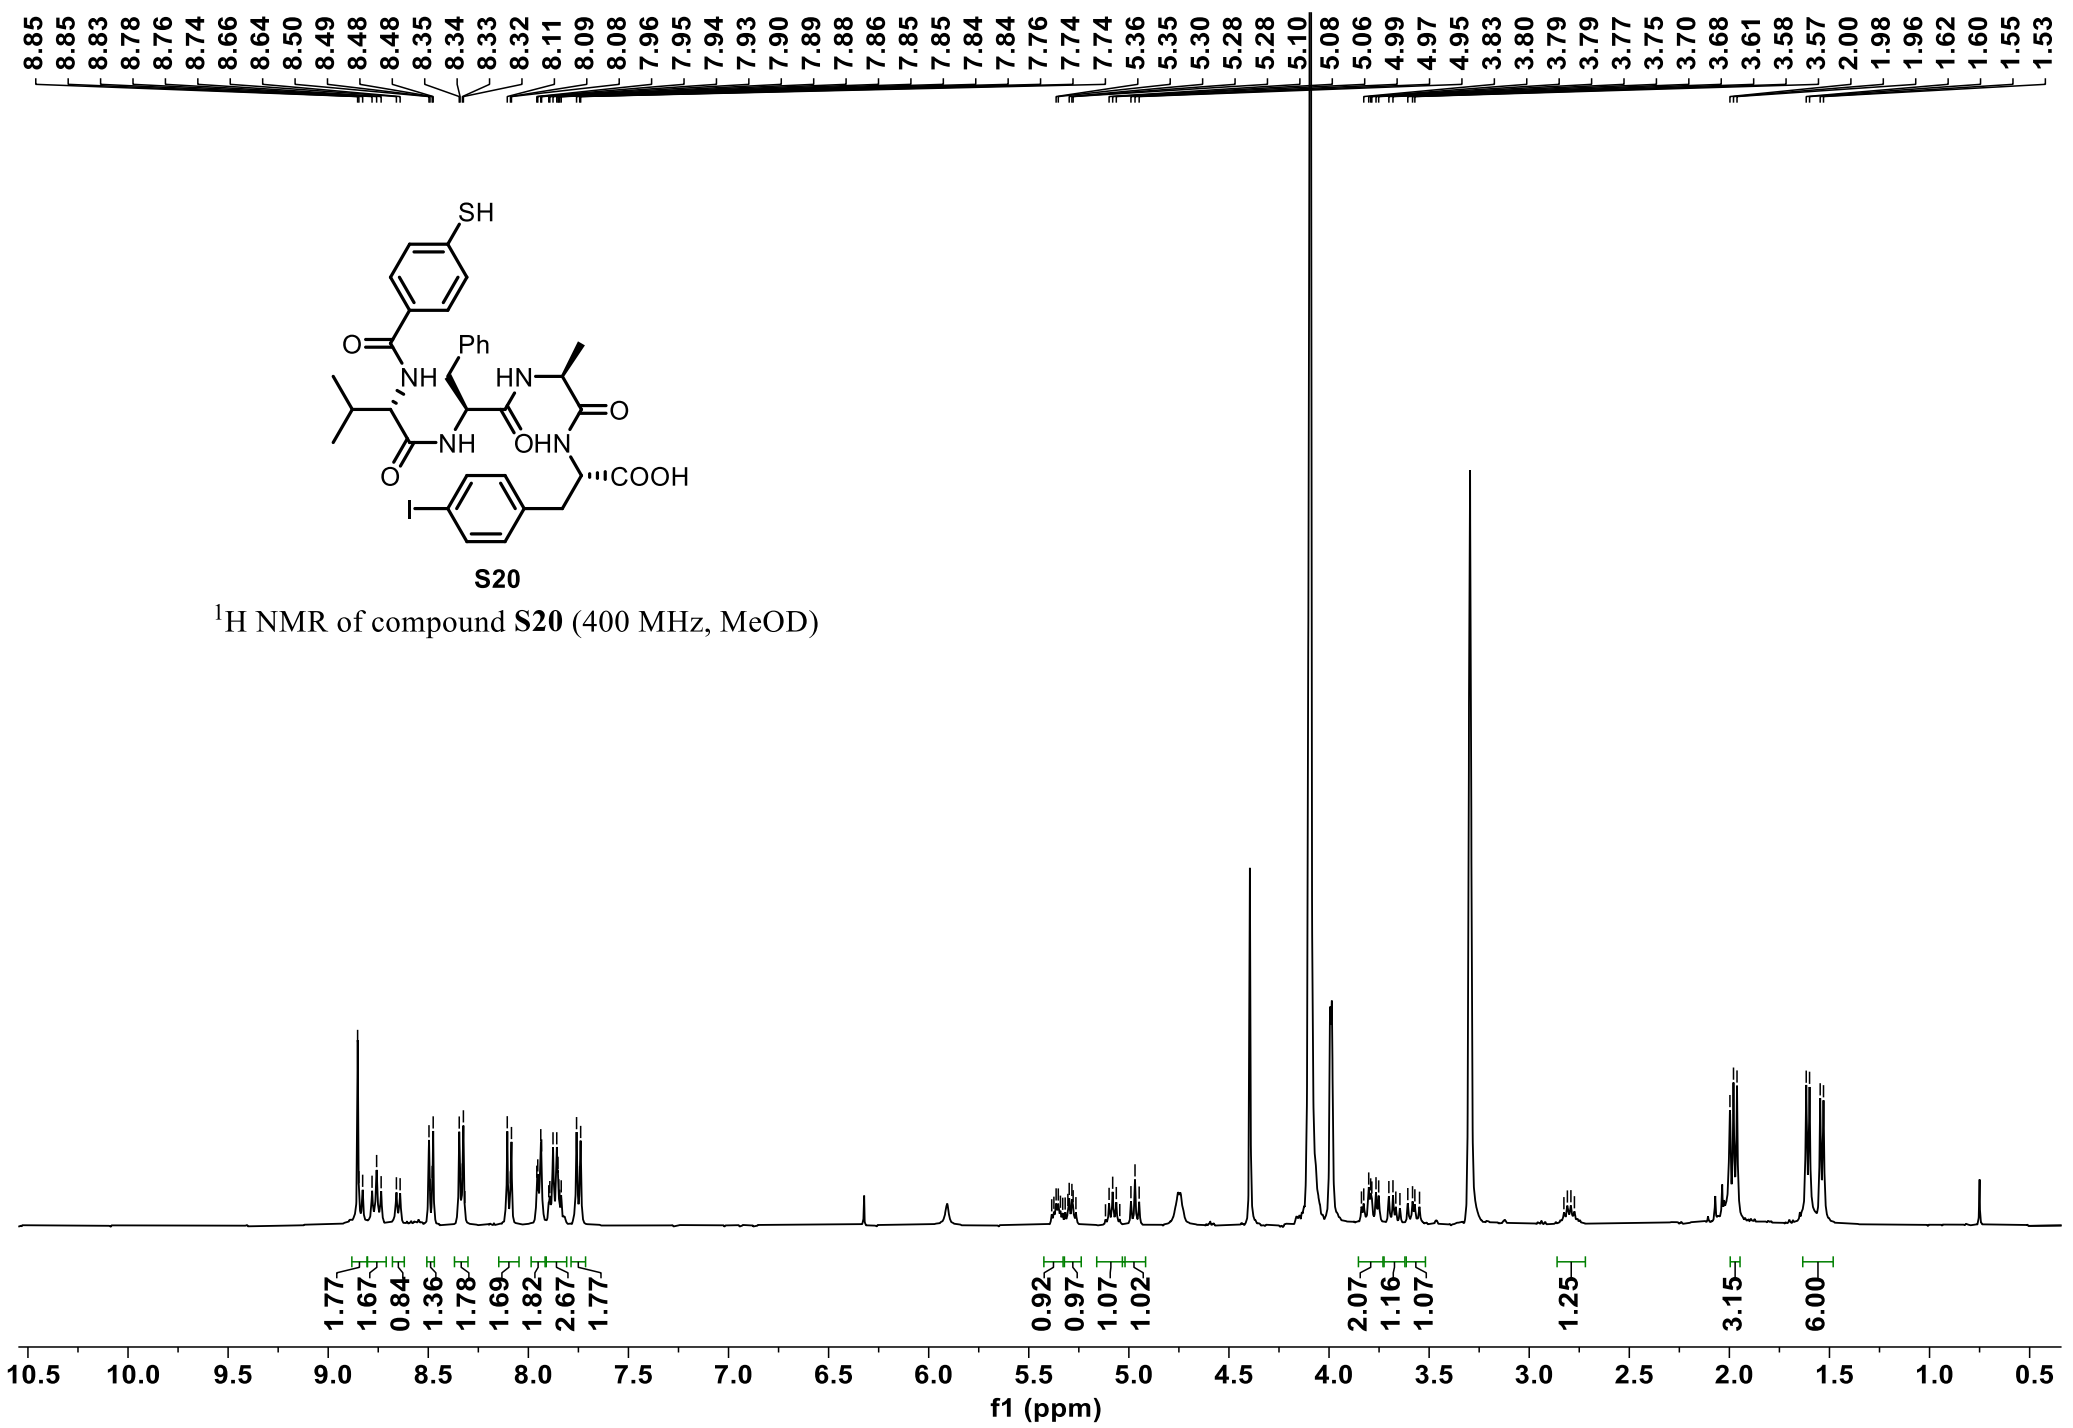

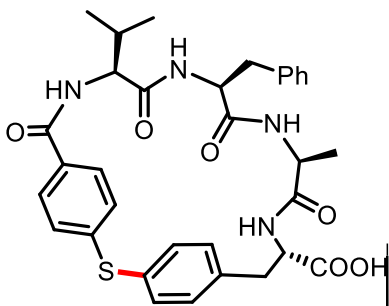

**20**

$^1\text{H}$  NMR of compound **20** (400 MHz, MeOD)

7.67  
7.65  
7.34  
7.21  
7.19  
7.17  
7.15  
7.12  
7.10  
6.91  
6.89

4.66  
4.65  
4.64  
4.62  
4.38  
4.35  
3.96  
3.93  
3.34  
3.30  
3.29  
3.27  
3.25  
2.82  
2.82  
2.79  
2.75  
2.75  
2.69  
2.66  
2.65  
2.63  
1.66  
1.64  
1.62  
1.60  
1.58  
1.36  
1.34  
0.83  
0.81  
0.46  
0.44

1.78  
3.59  
3.82  
1.08  
1.87

1.20  
1.00  
1.88

1.81  
1.34  
1.08

1.05  
2.92  
3.22  
2.69

10.5 10.0 9.5 9.0 8.5 8.0 7.5 7.0 6.5 6.0 5.5 5.0 4.5 4.0 3.5 3.0 2.5 2.0 1.5 1.0 0.5 0.0 -0.5

f1 (ppm)

173.94  
173.60  
170.88  
170.84  
167.79  
143.20  
140.26  
138.37  
135.99  
133.54  
131.47  
130.92  
130.14  
129.55  
129.18  
128.42  
127.87  
126.60

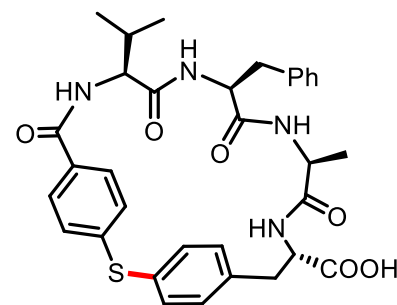

**20**

$^{13}\text{C}$  NMR of compound **20** (101 MHz, MeOD)

52.32  
36.97  
35.58  
30.54  
29.48  
27.01  
20.10  
19.16

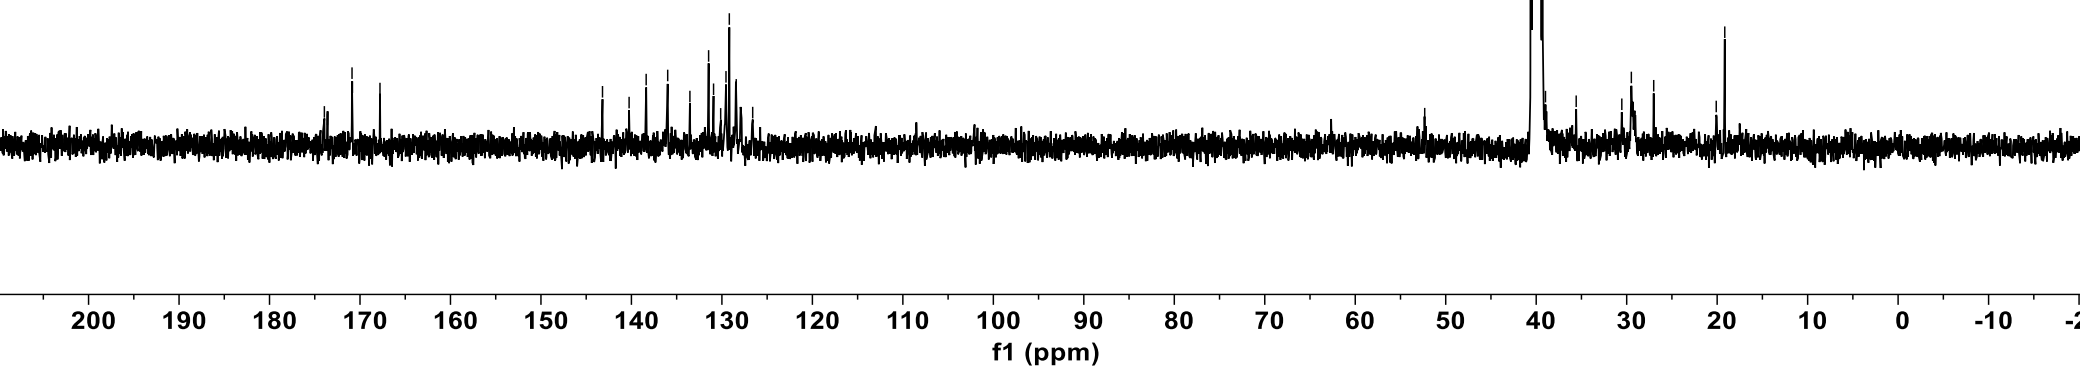

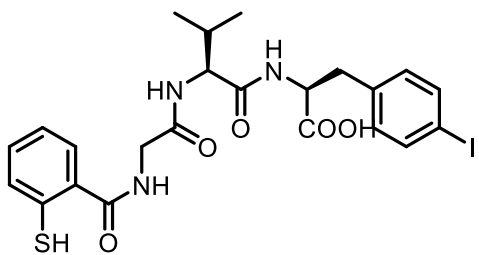

**S21**

<sup>1</sup>H NMR of compound S21 (400 MHz, MeOD)

7.78  
7.76  
7.70  
7.69  
7.68  
7.67  
7.59  
7.57  
7.42  
7.41  
7.40  
7.38  
7.37  
7.30  
7.30  
7.28  
7.28  
7.26  
7.26  
7.02  
7.00

4.67  
4.66  
4.65  
4.64  
4.28  
4.27  
4.25  
4.24  
4.07  
3.17  
3.16  
3.13  
3.12  
2.98  
2.96  
2.94  
2.92  
2.10  
2.08  
2.07  
2.05  
2.03  
2.02  
0.94  
0.92  
0.90  
0.88

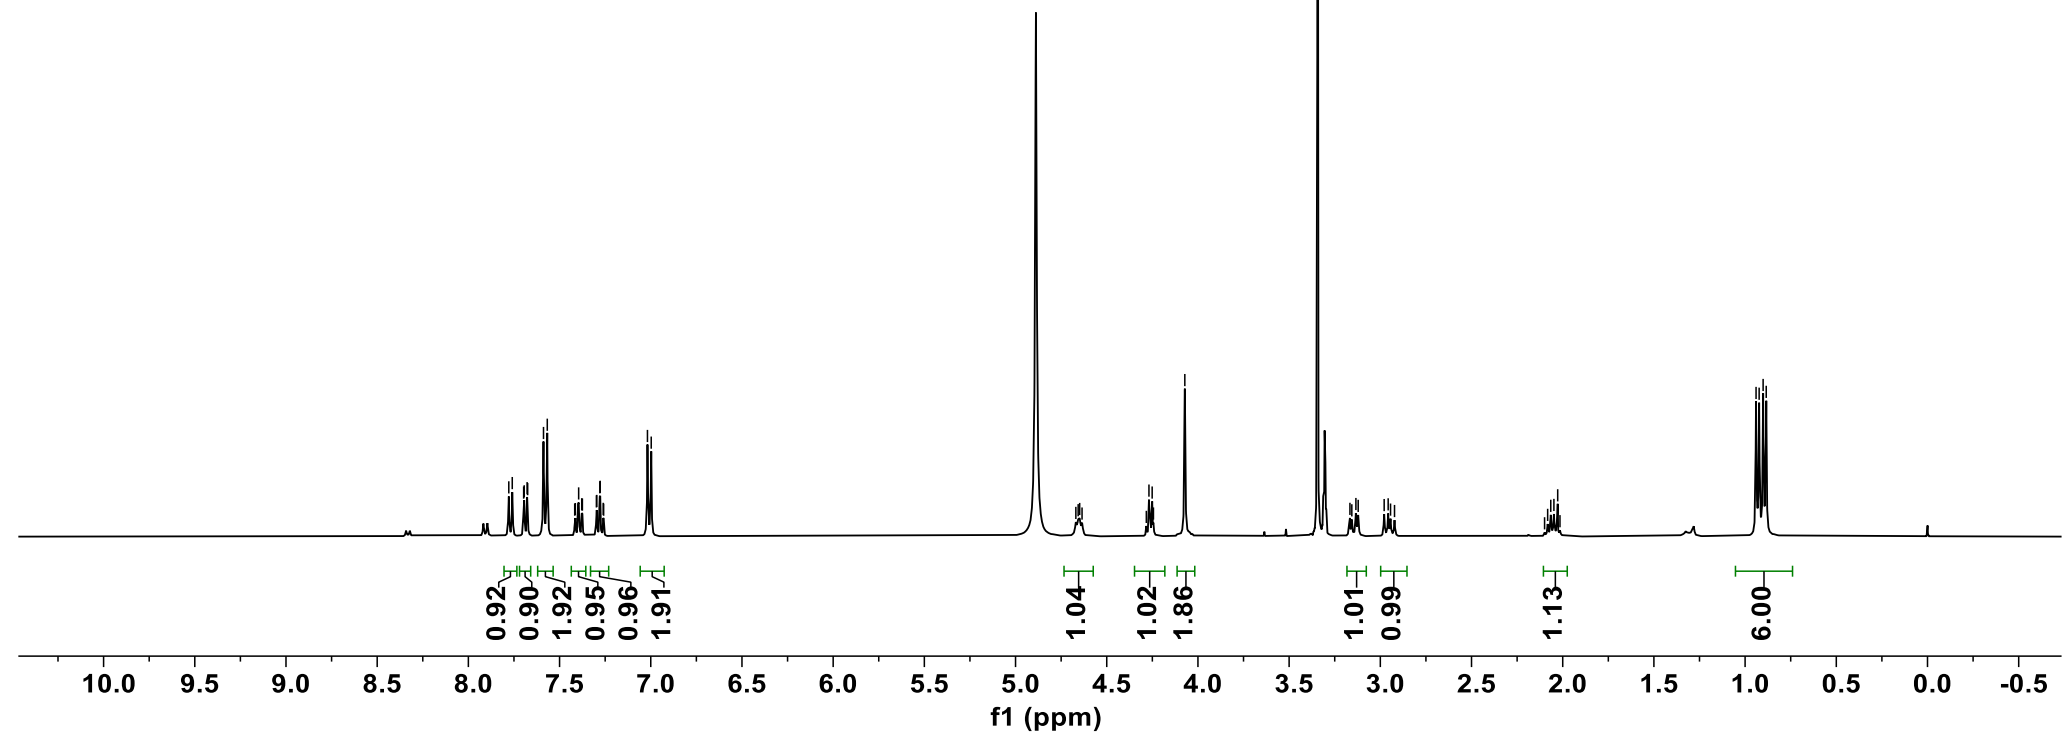

8.15  
8.13  
7.89  
7.87  
7.80  
7.75  
7.73  
7.58  
7.57  
7.55  
7.54  
7.53  
7.04  
7.02  
6.86  
6.84

4.55  
4.53  
4.51  
3.96  
3.95  
3.92  
3.91  
3.90  
3.88  
3.67  
3.66  
3.63  
3.62  
3.11  
3.08  
2.66  
2.63  
2.59  
1.82  
1.80  
1.78  
1.76  
0.82  
0.81  
0.79

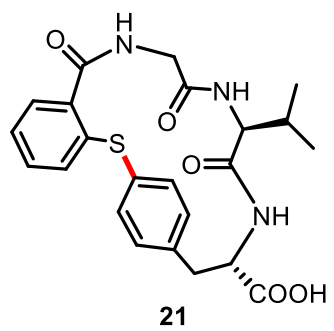

<sup>1</sup>H NMR of compound 21 (400 MHz, DMSO)

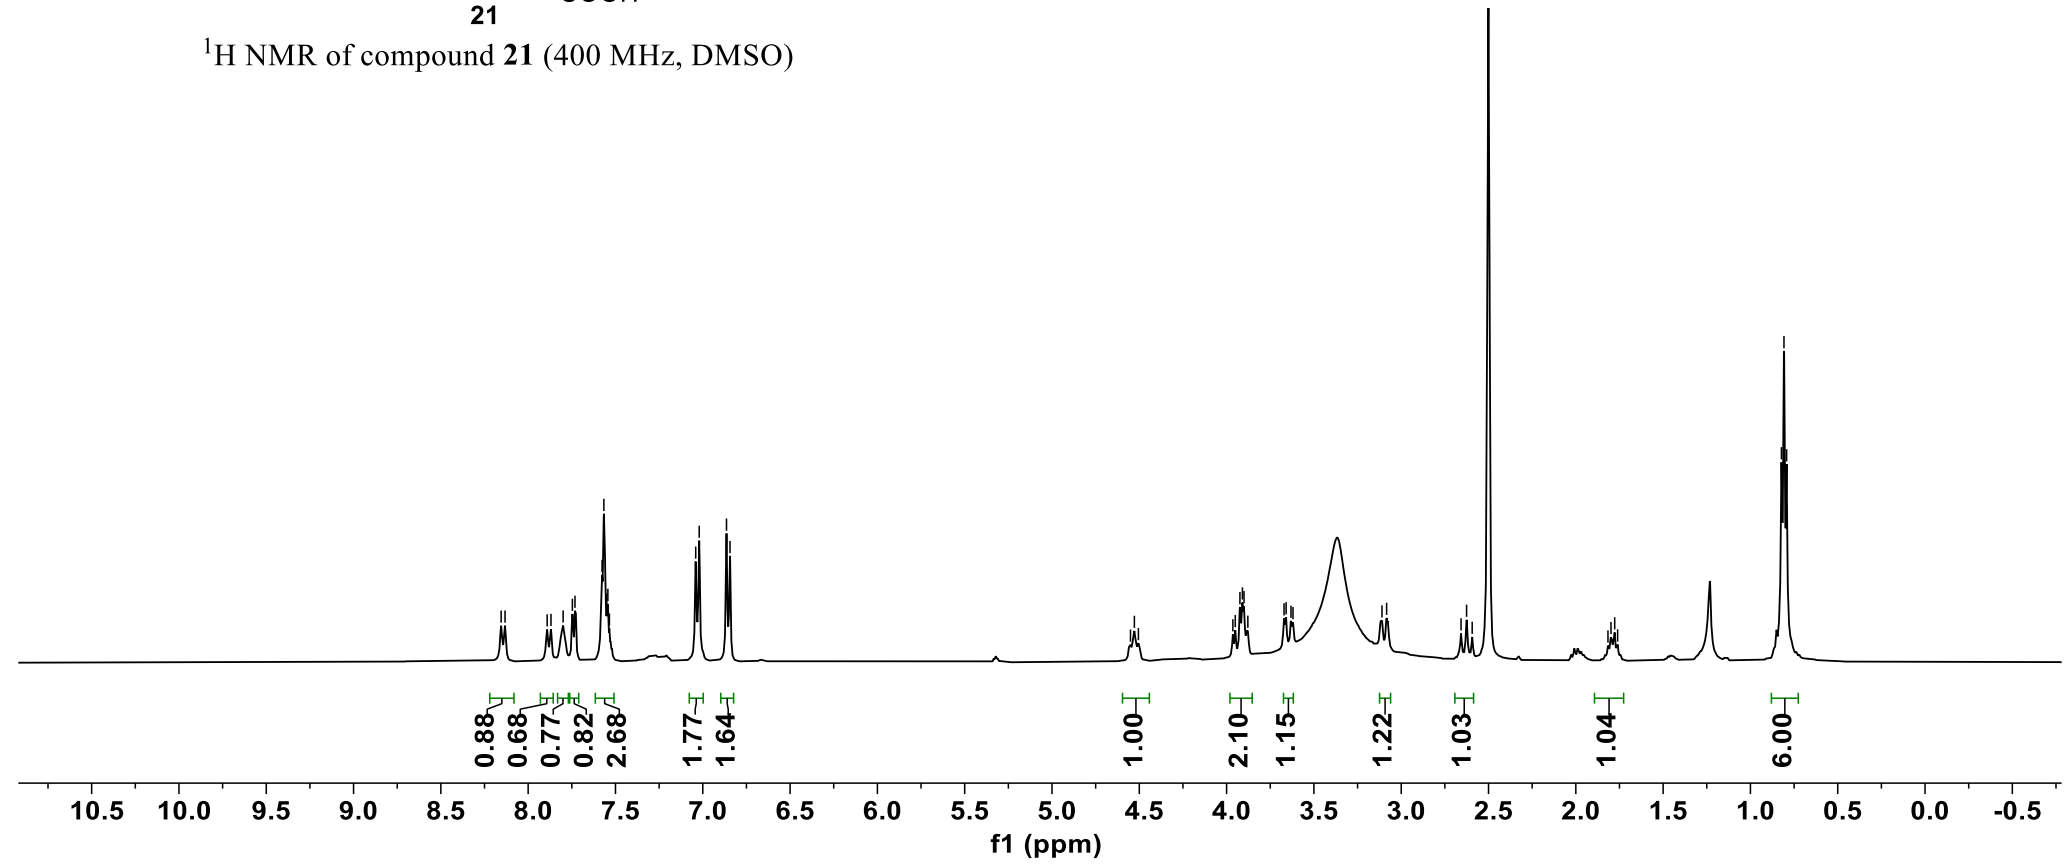

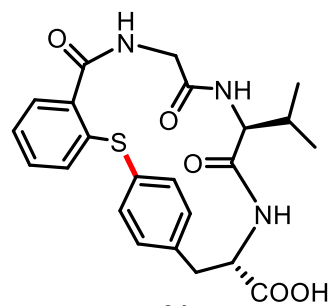

**21**

$^{13}\text{C}$  NMR of compound **21** (101 MHz, DMSO)

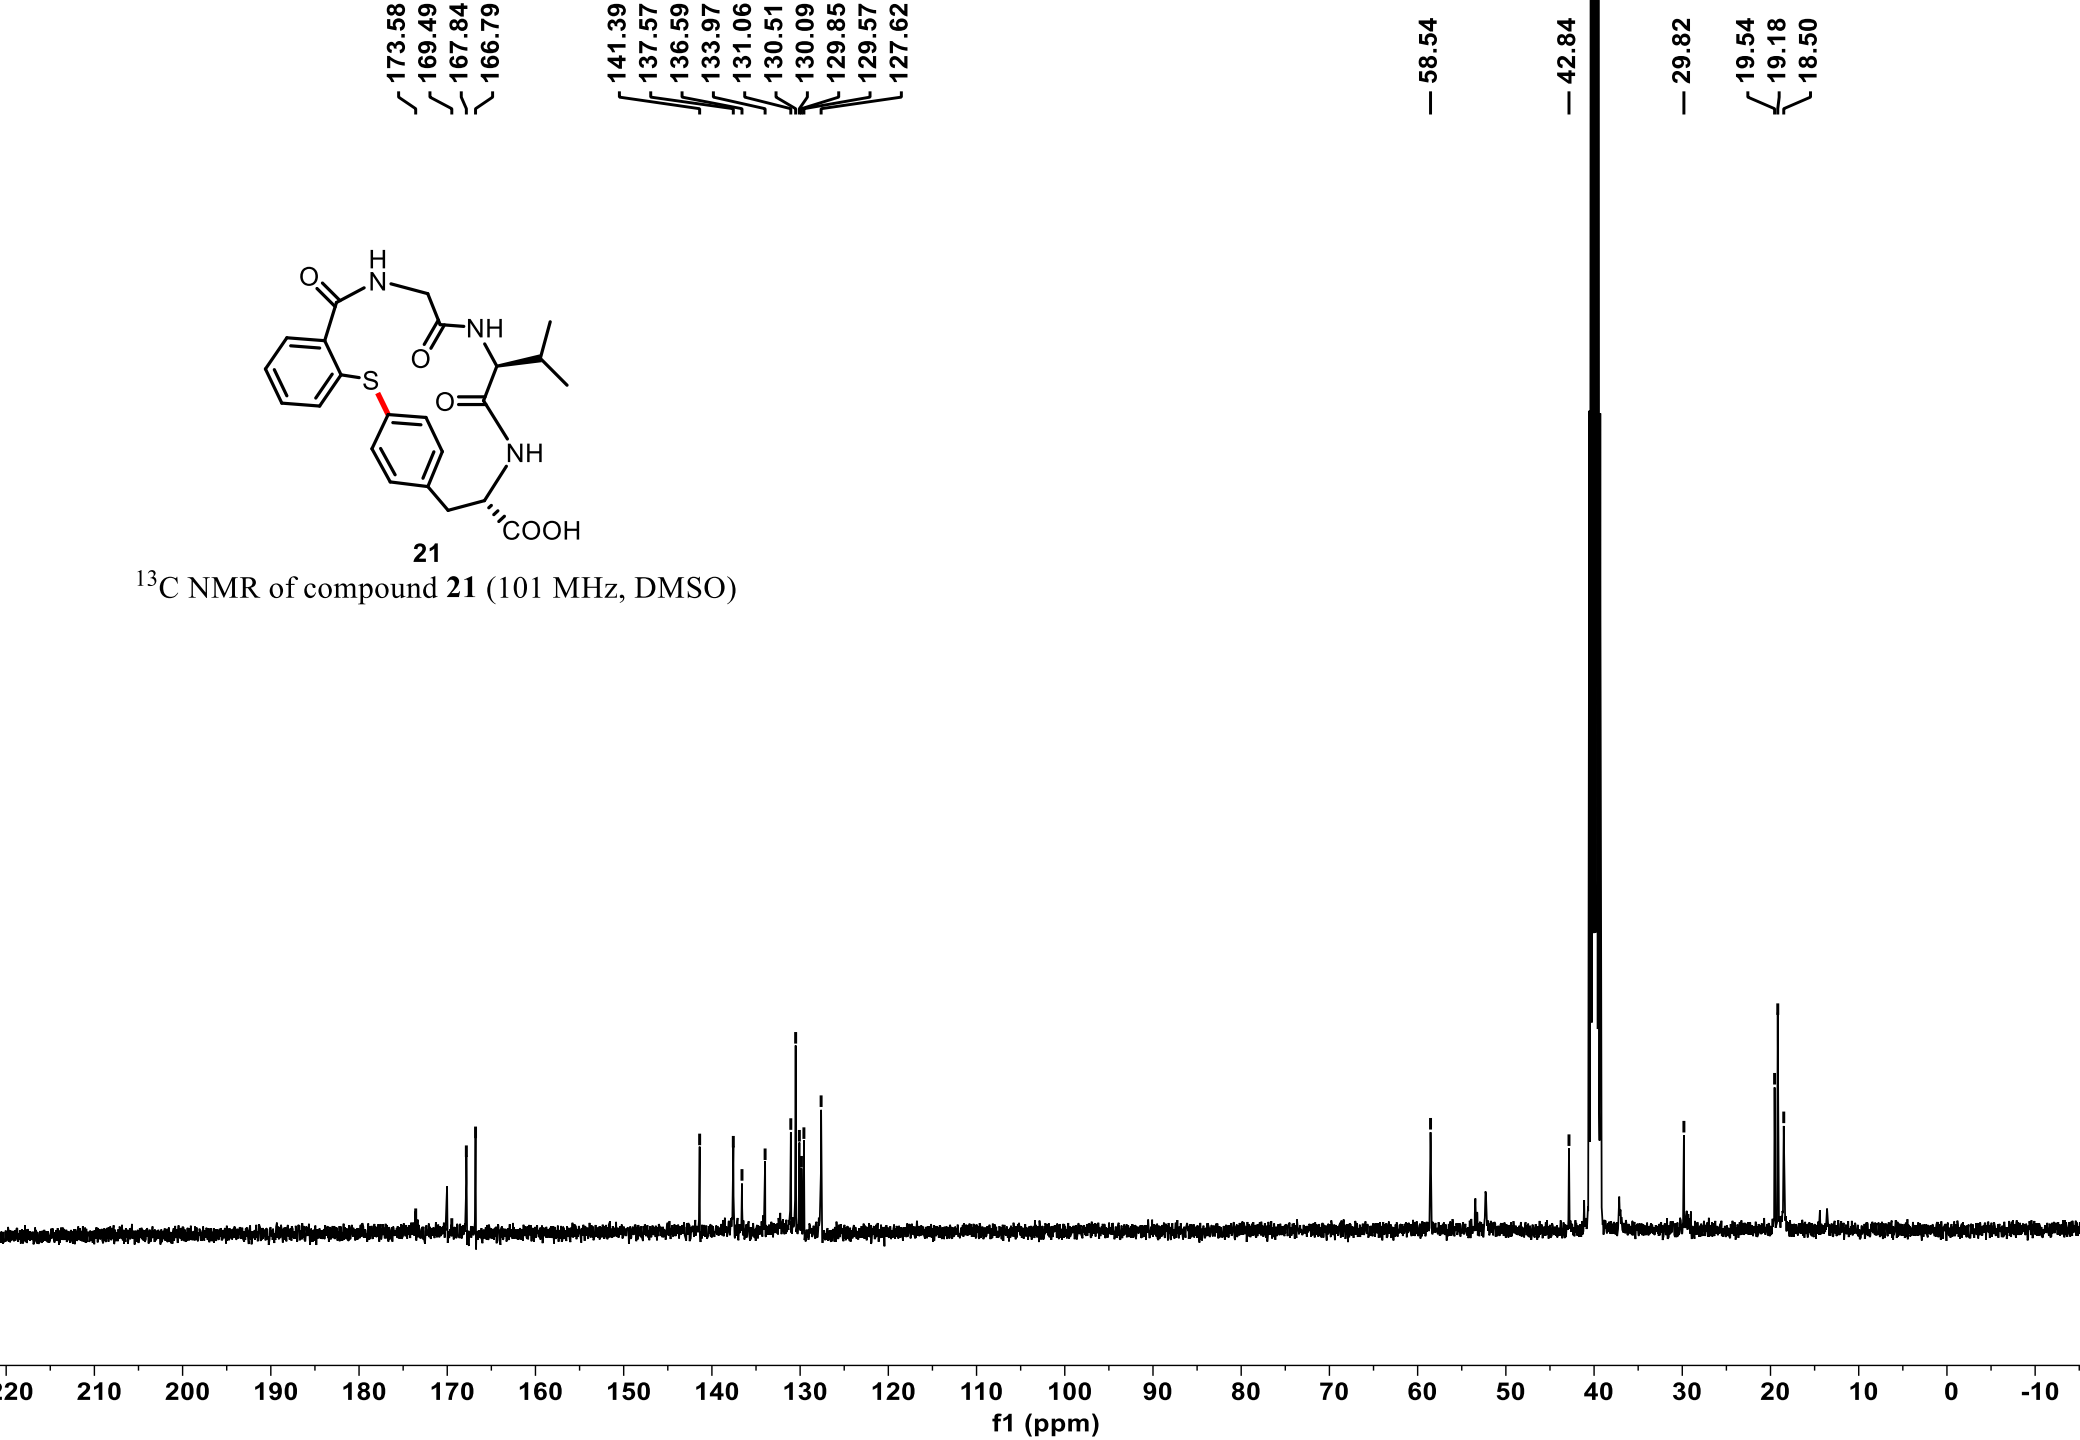



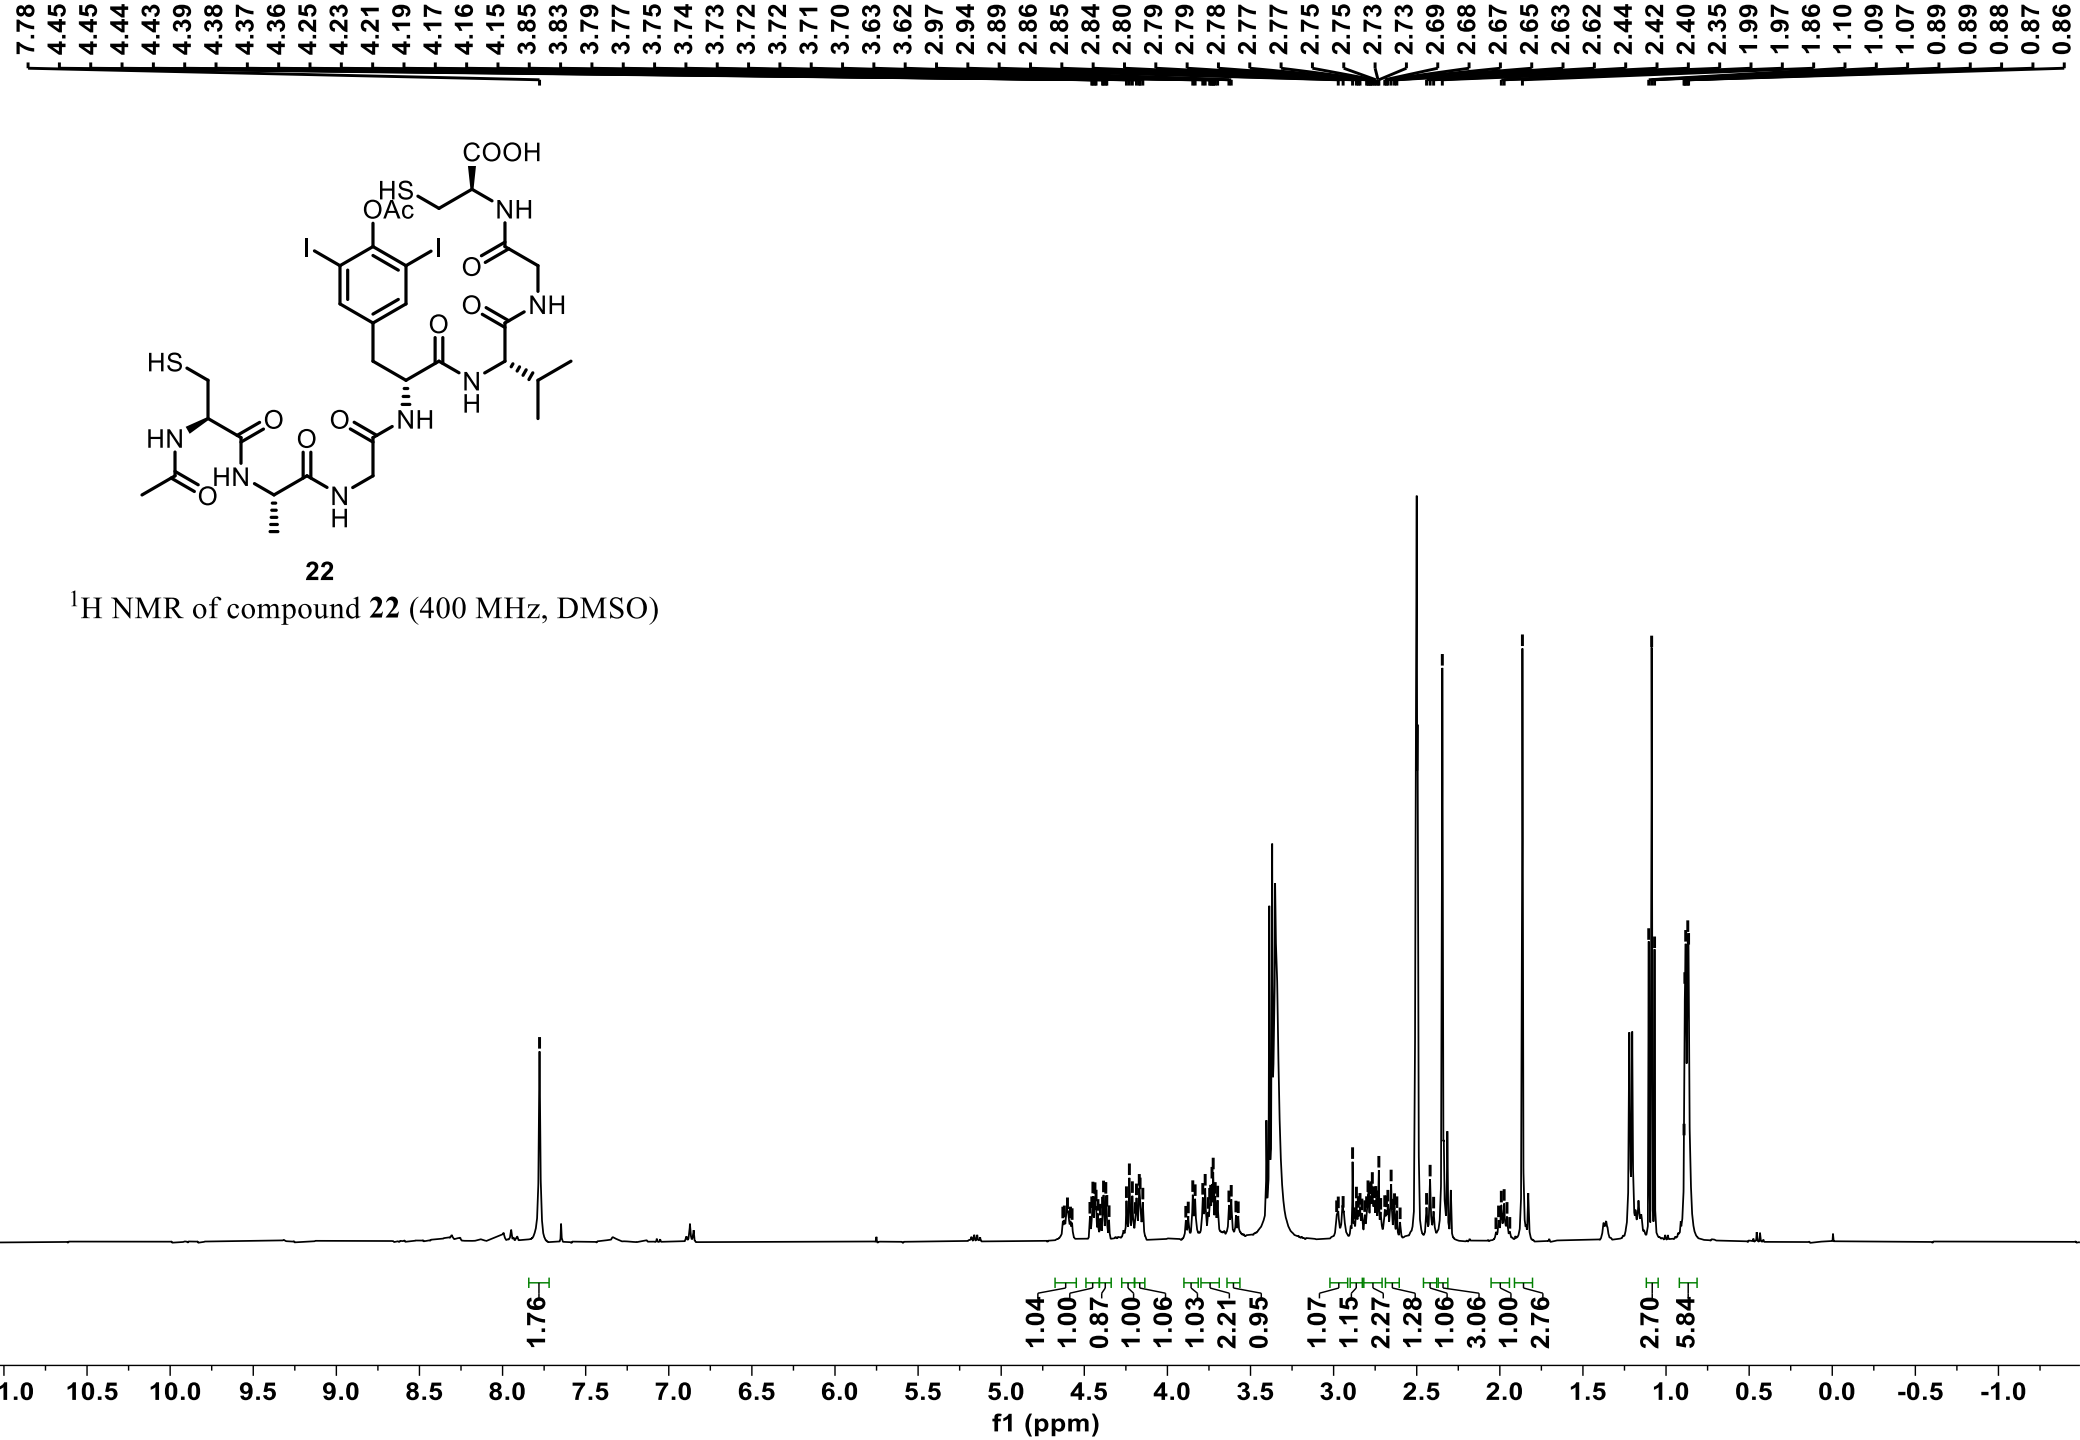

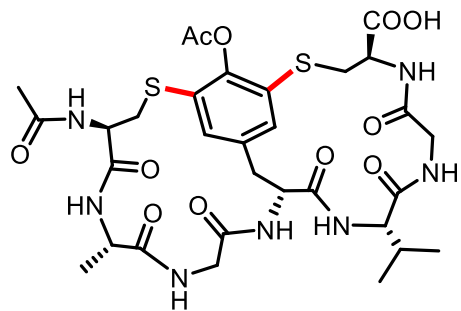

**23**

$^1\text{H}$  NMR of compound **23** (400 MHz, DMSO)

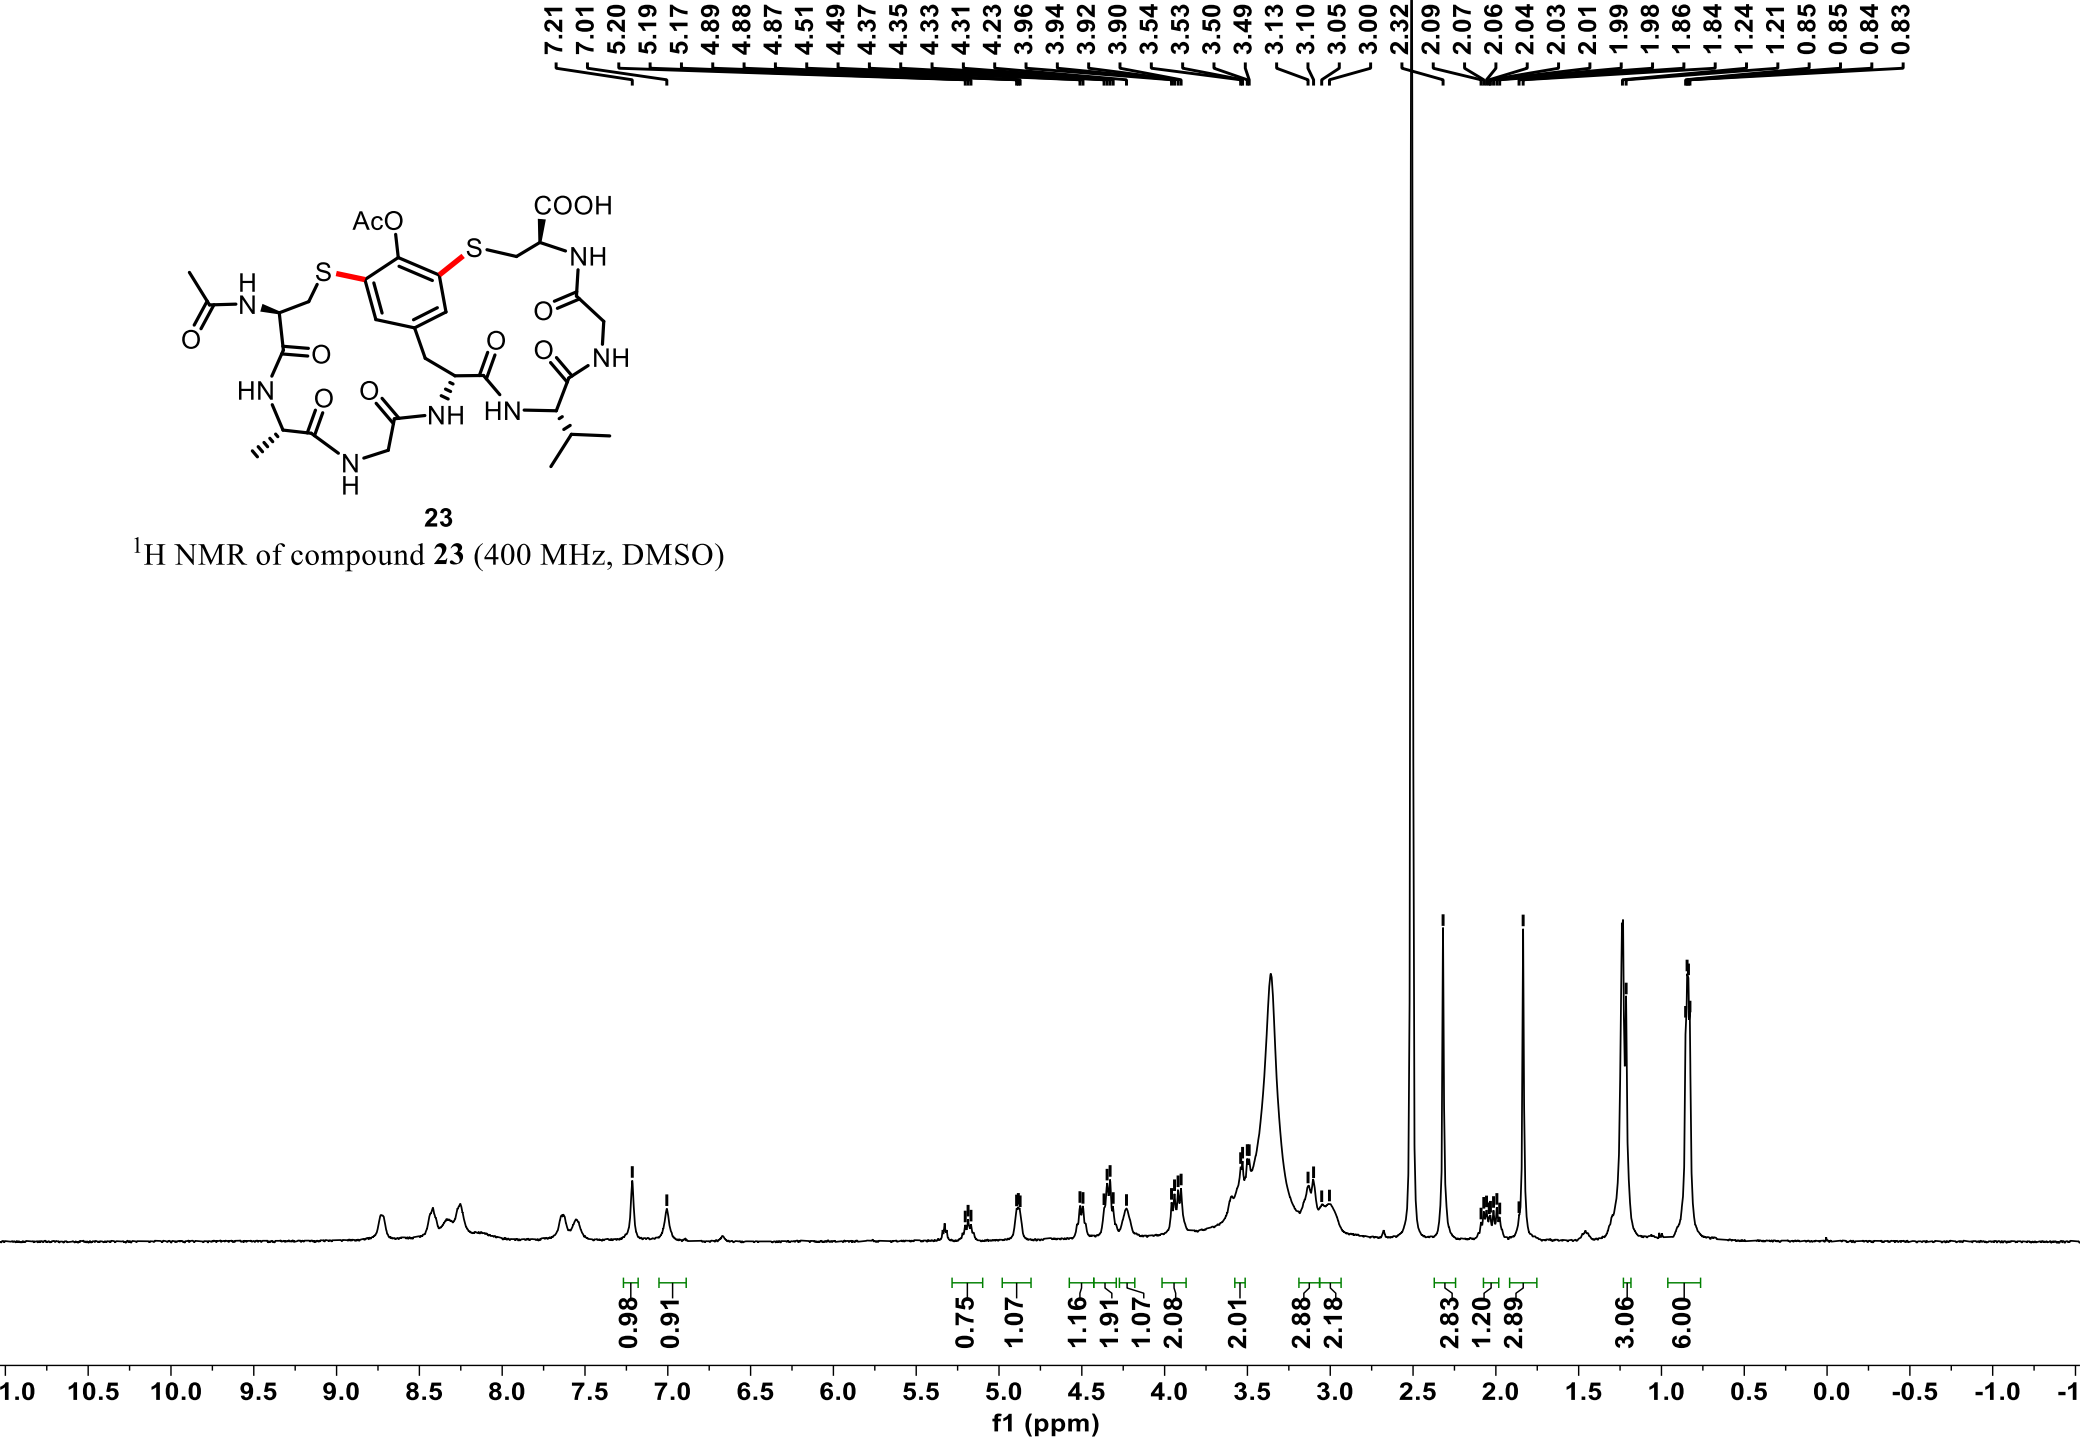

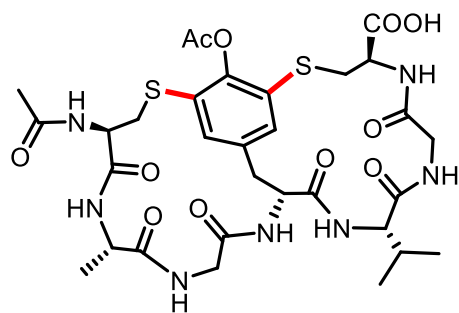

**23**

$^{13}\text{C}$  NMR of compound **23** (101 MHz, DMSO)

171.81  
170.41  
169.73  
169.22  
169.05  
168.50

136.12  
134.46  
130.82  
129.86  
128.74  
124.13  
121.73

57.91  
53.76  
52.34  
48.65  
44.60  
43.09  
37.37  
31.79  
31.19  
27.01  
25.57  
22.83  
22.56  
19.82  
18.10

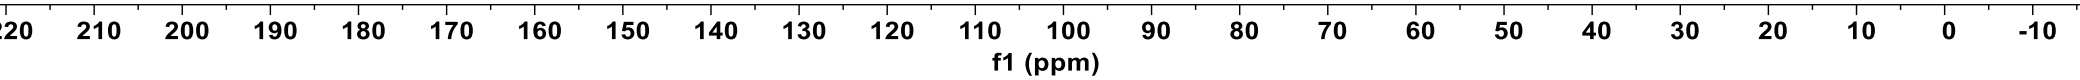



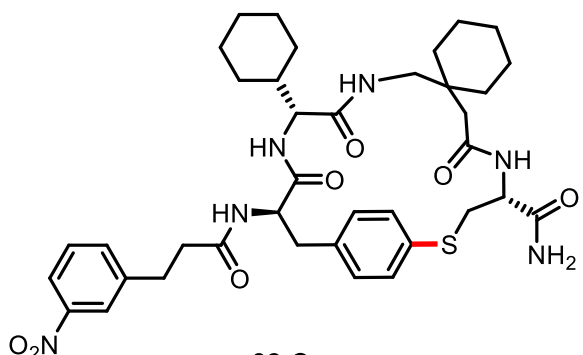

**32-C**

<sup>1</sup>H NMR of compound **32-C** (400 MHz, MeOD)

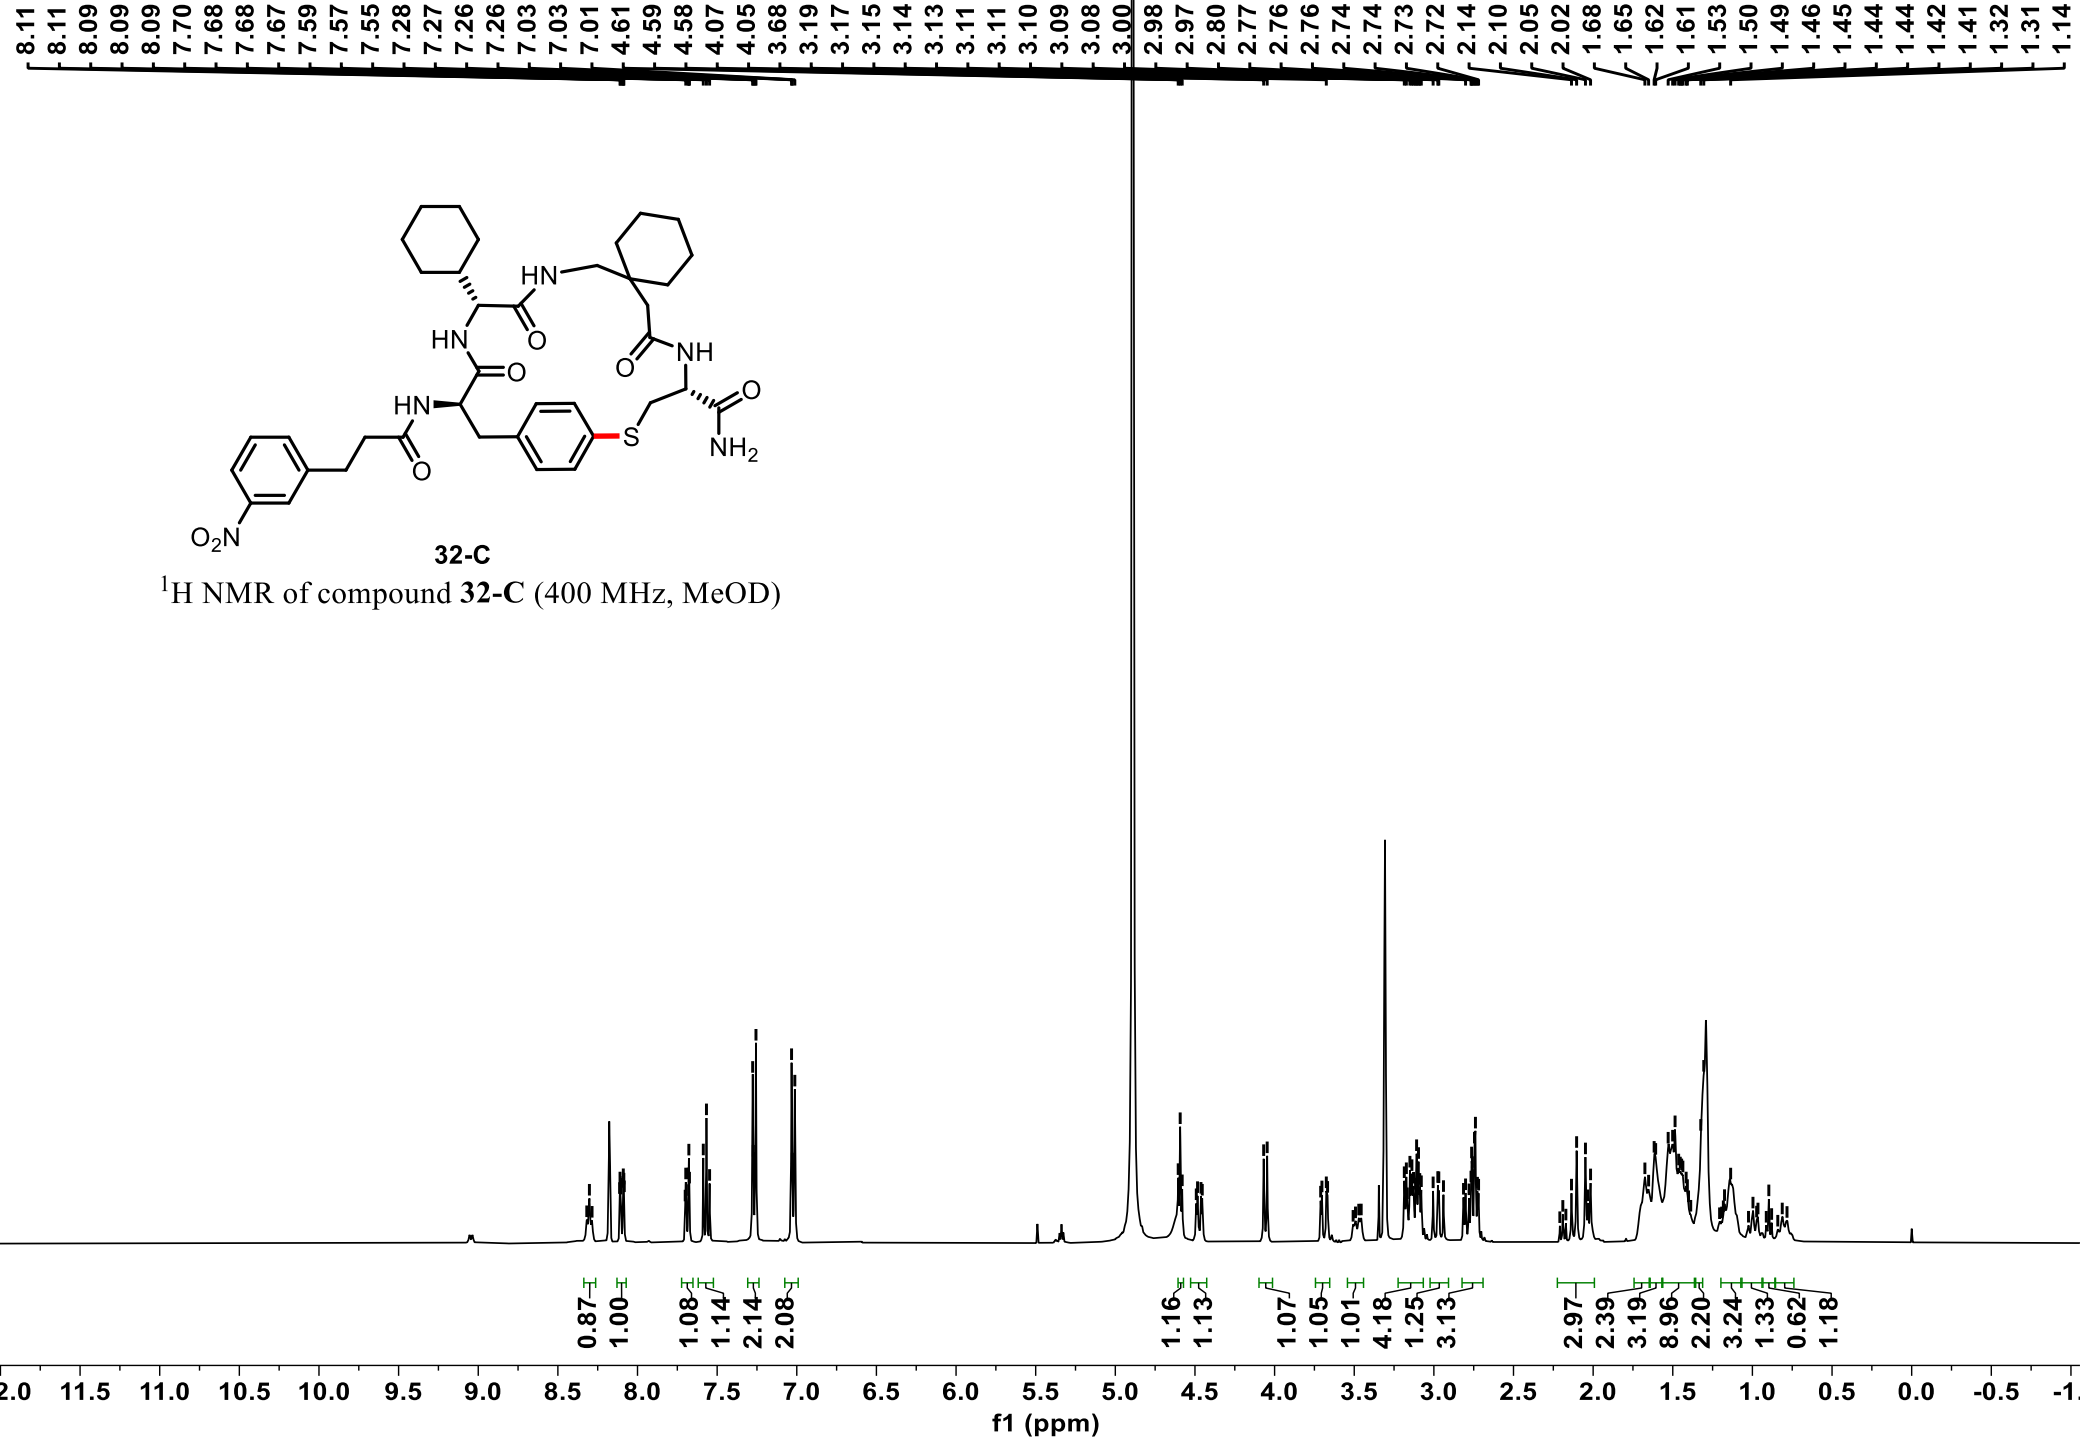

175.42  
174.71  
174.19  
174.02  
171.85

149.86  
144.52  
137.43  
136.12  
135.87  
132.75  
130.97  
130.91  
130.87

124.13  
122.50

59.01  
56.62  
55.88  
41.11  
39.49  
38.41  
37.78  
37.64  
35.42  
35.20  
31.97  
30.84  
30.82  
30.01  
27.20  
27.10  
26.79  
22.66  
22.62

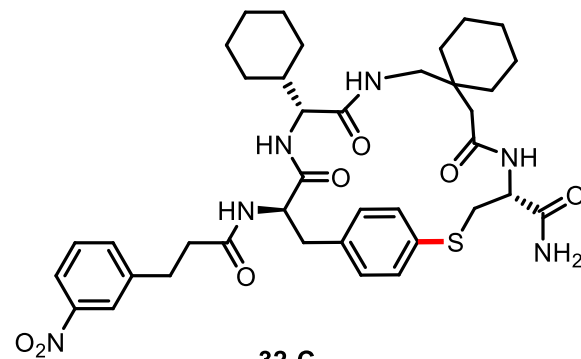

<sup>13</sup>C NMR of compound 32-C (101 MHz, MeOD)

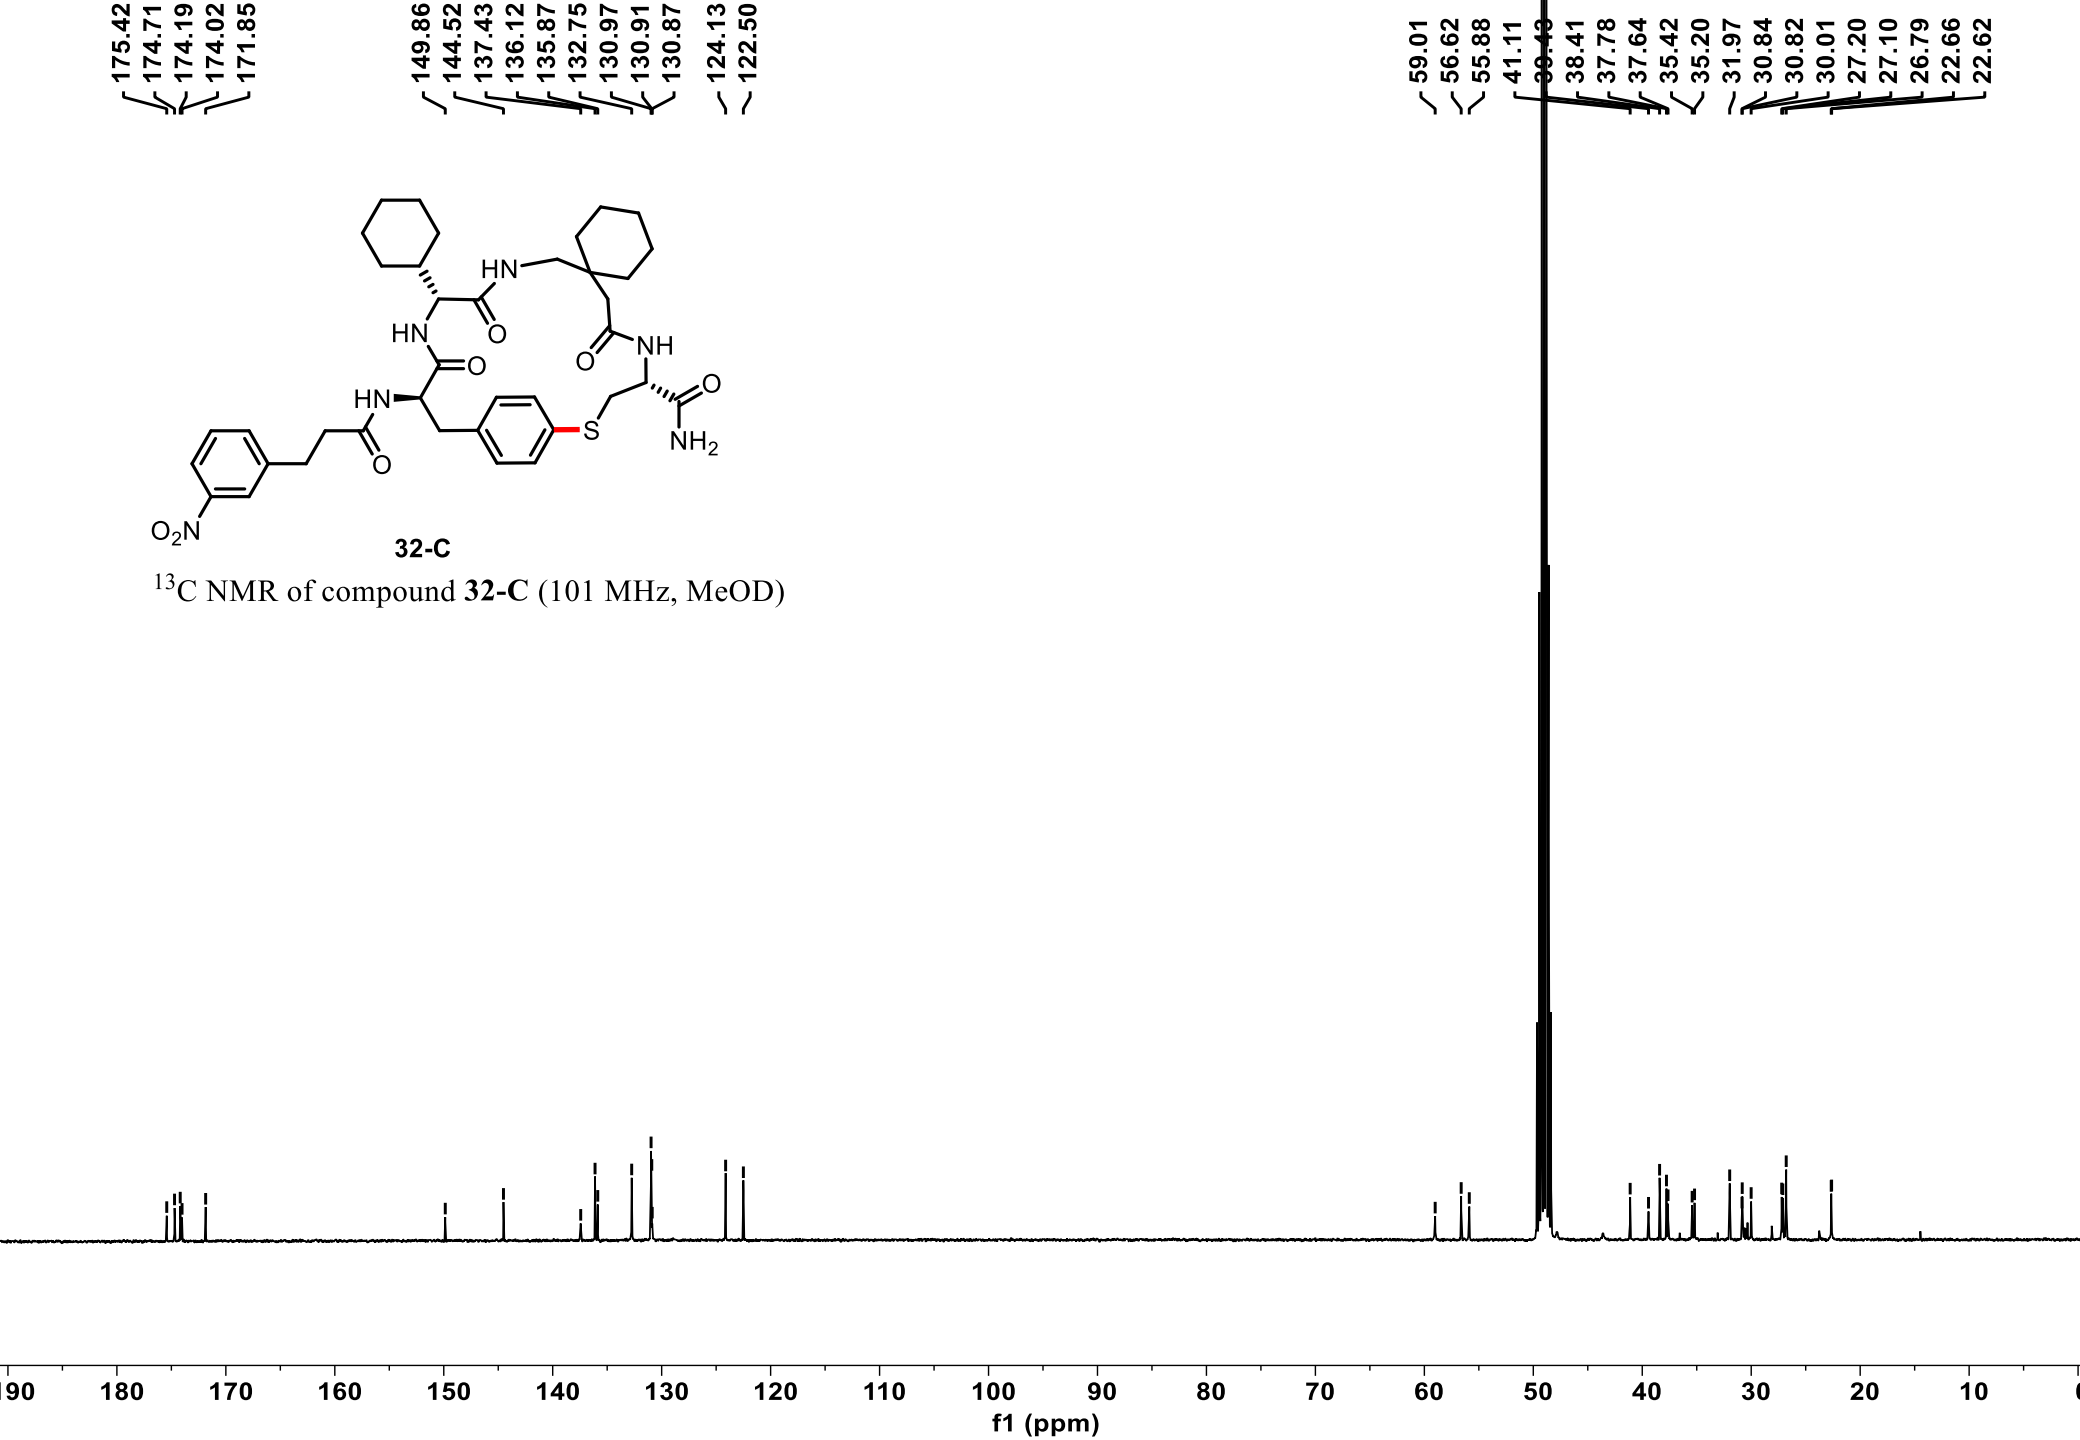

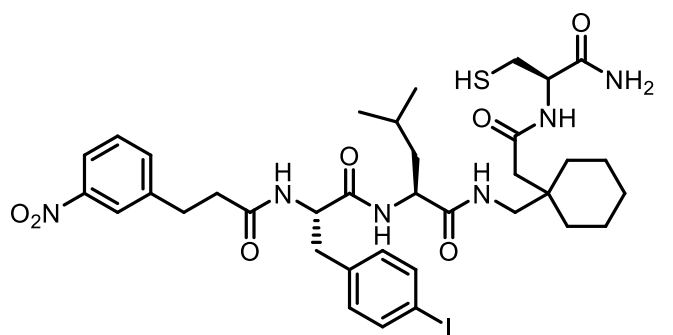

33-L

<sup>1</sup>H NMR of compound 33-L (400 MHz, MeOD)

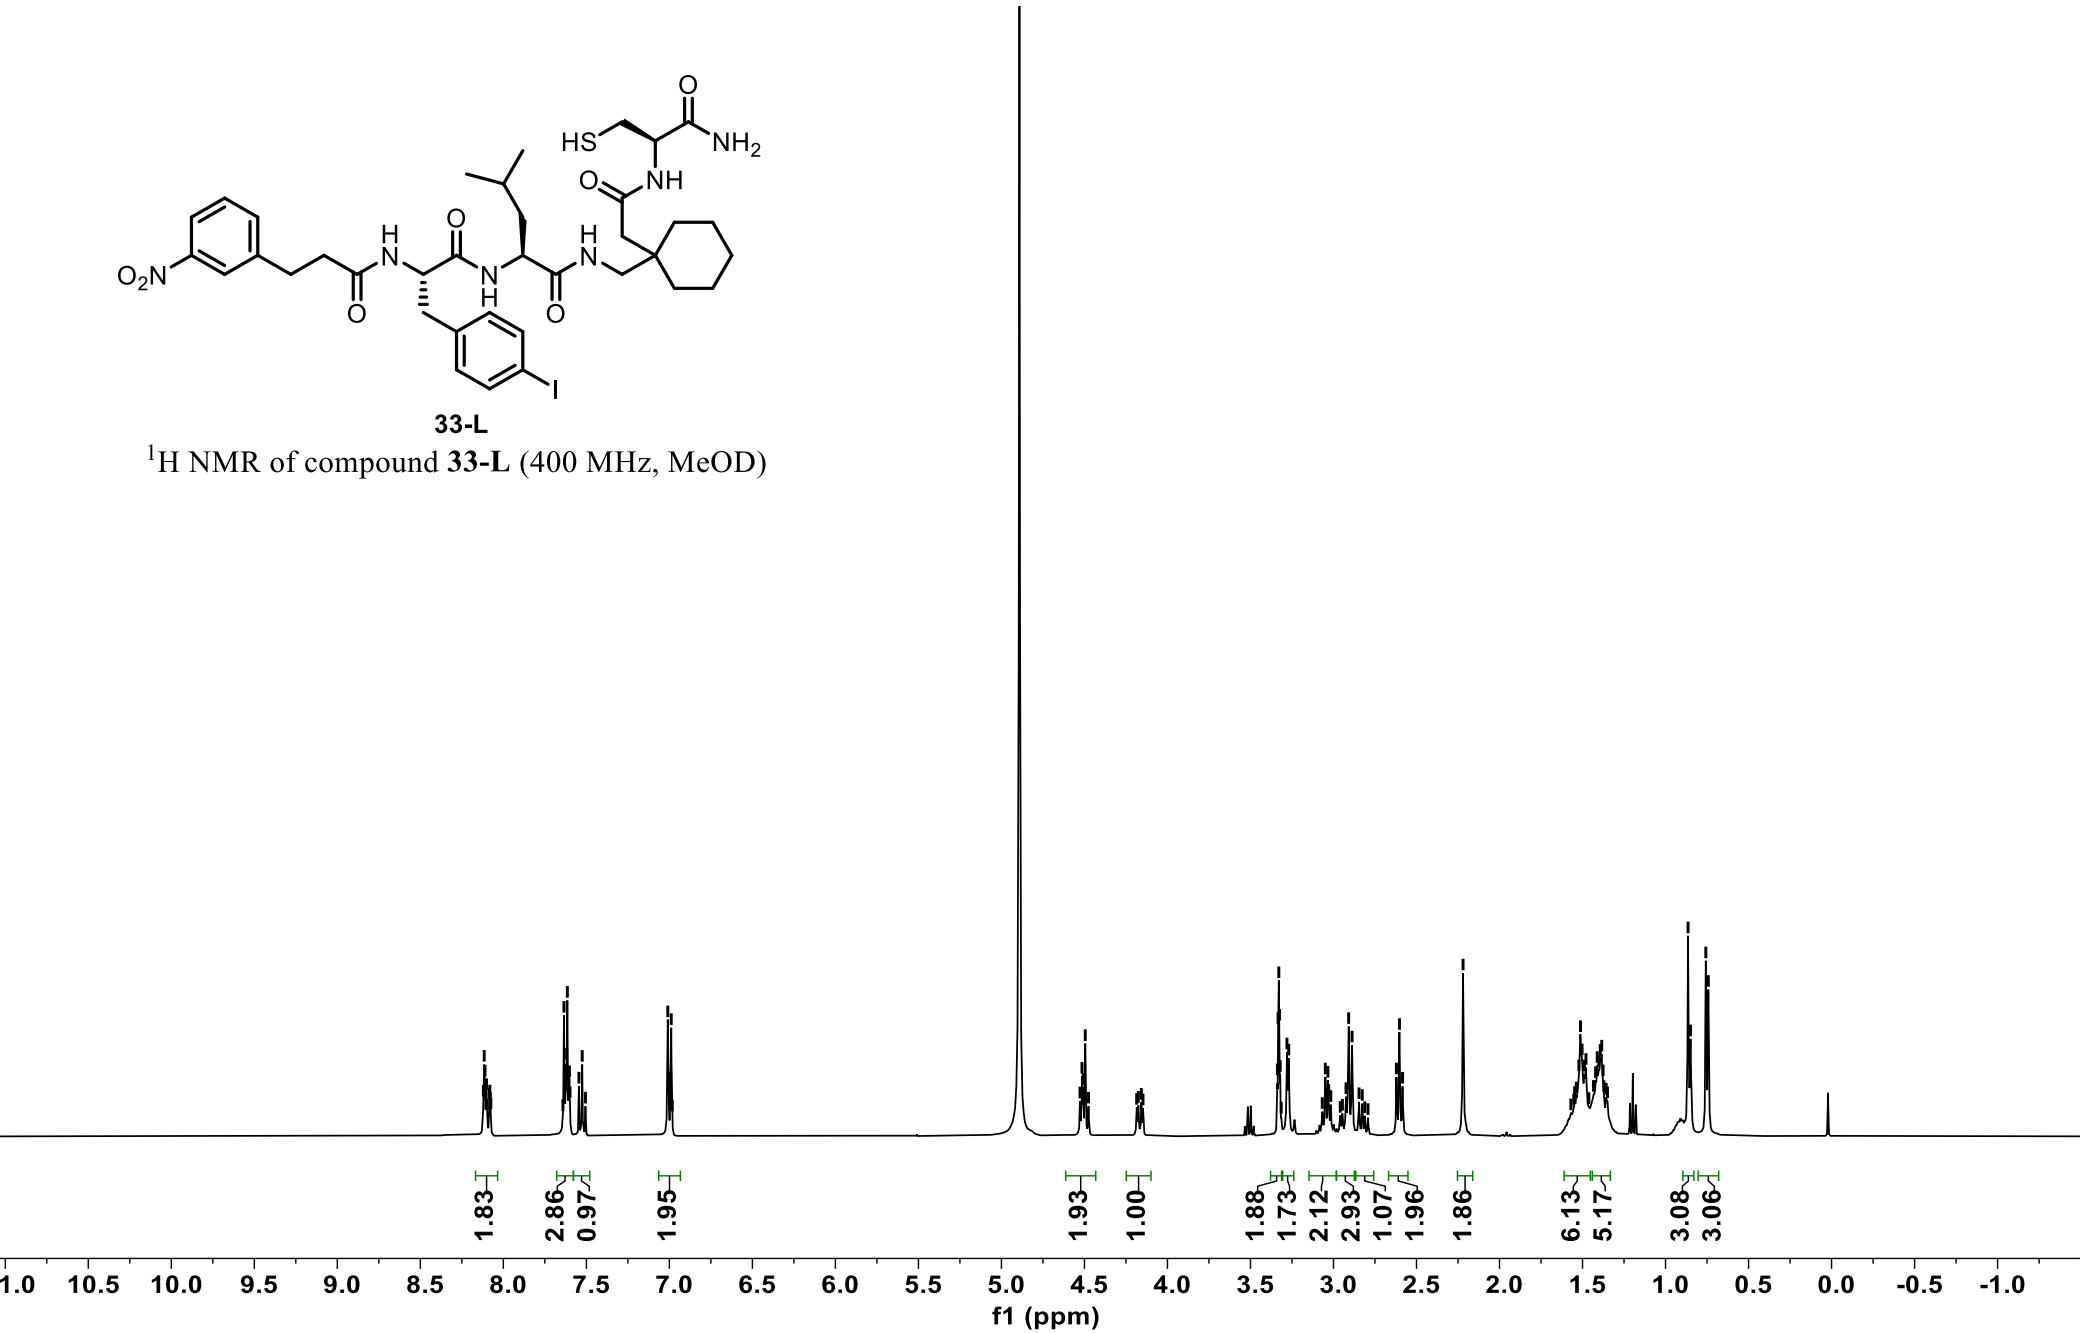

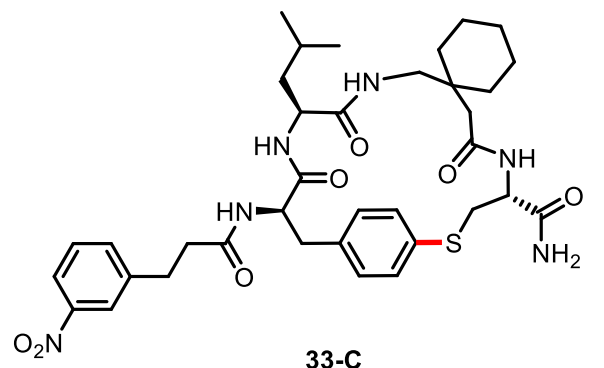

**33-C**

<sup>1</sup>H NMR of compound 33-C (400 MHz, MeOD)

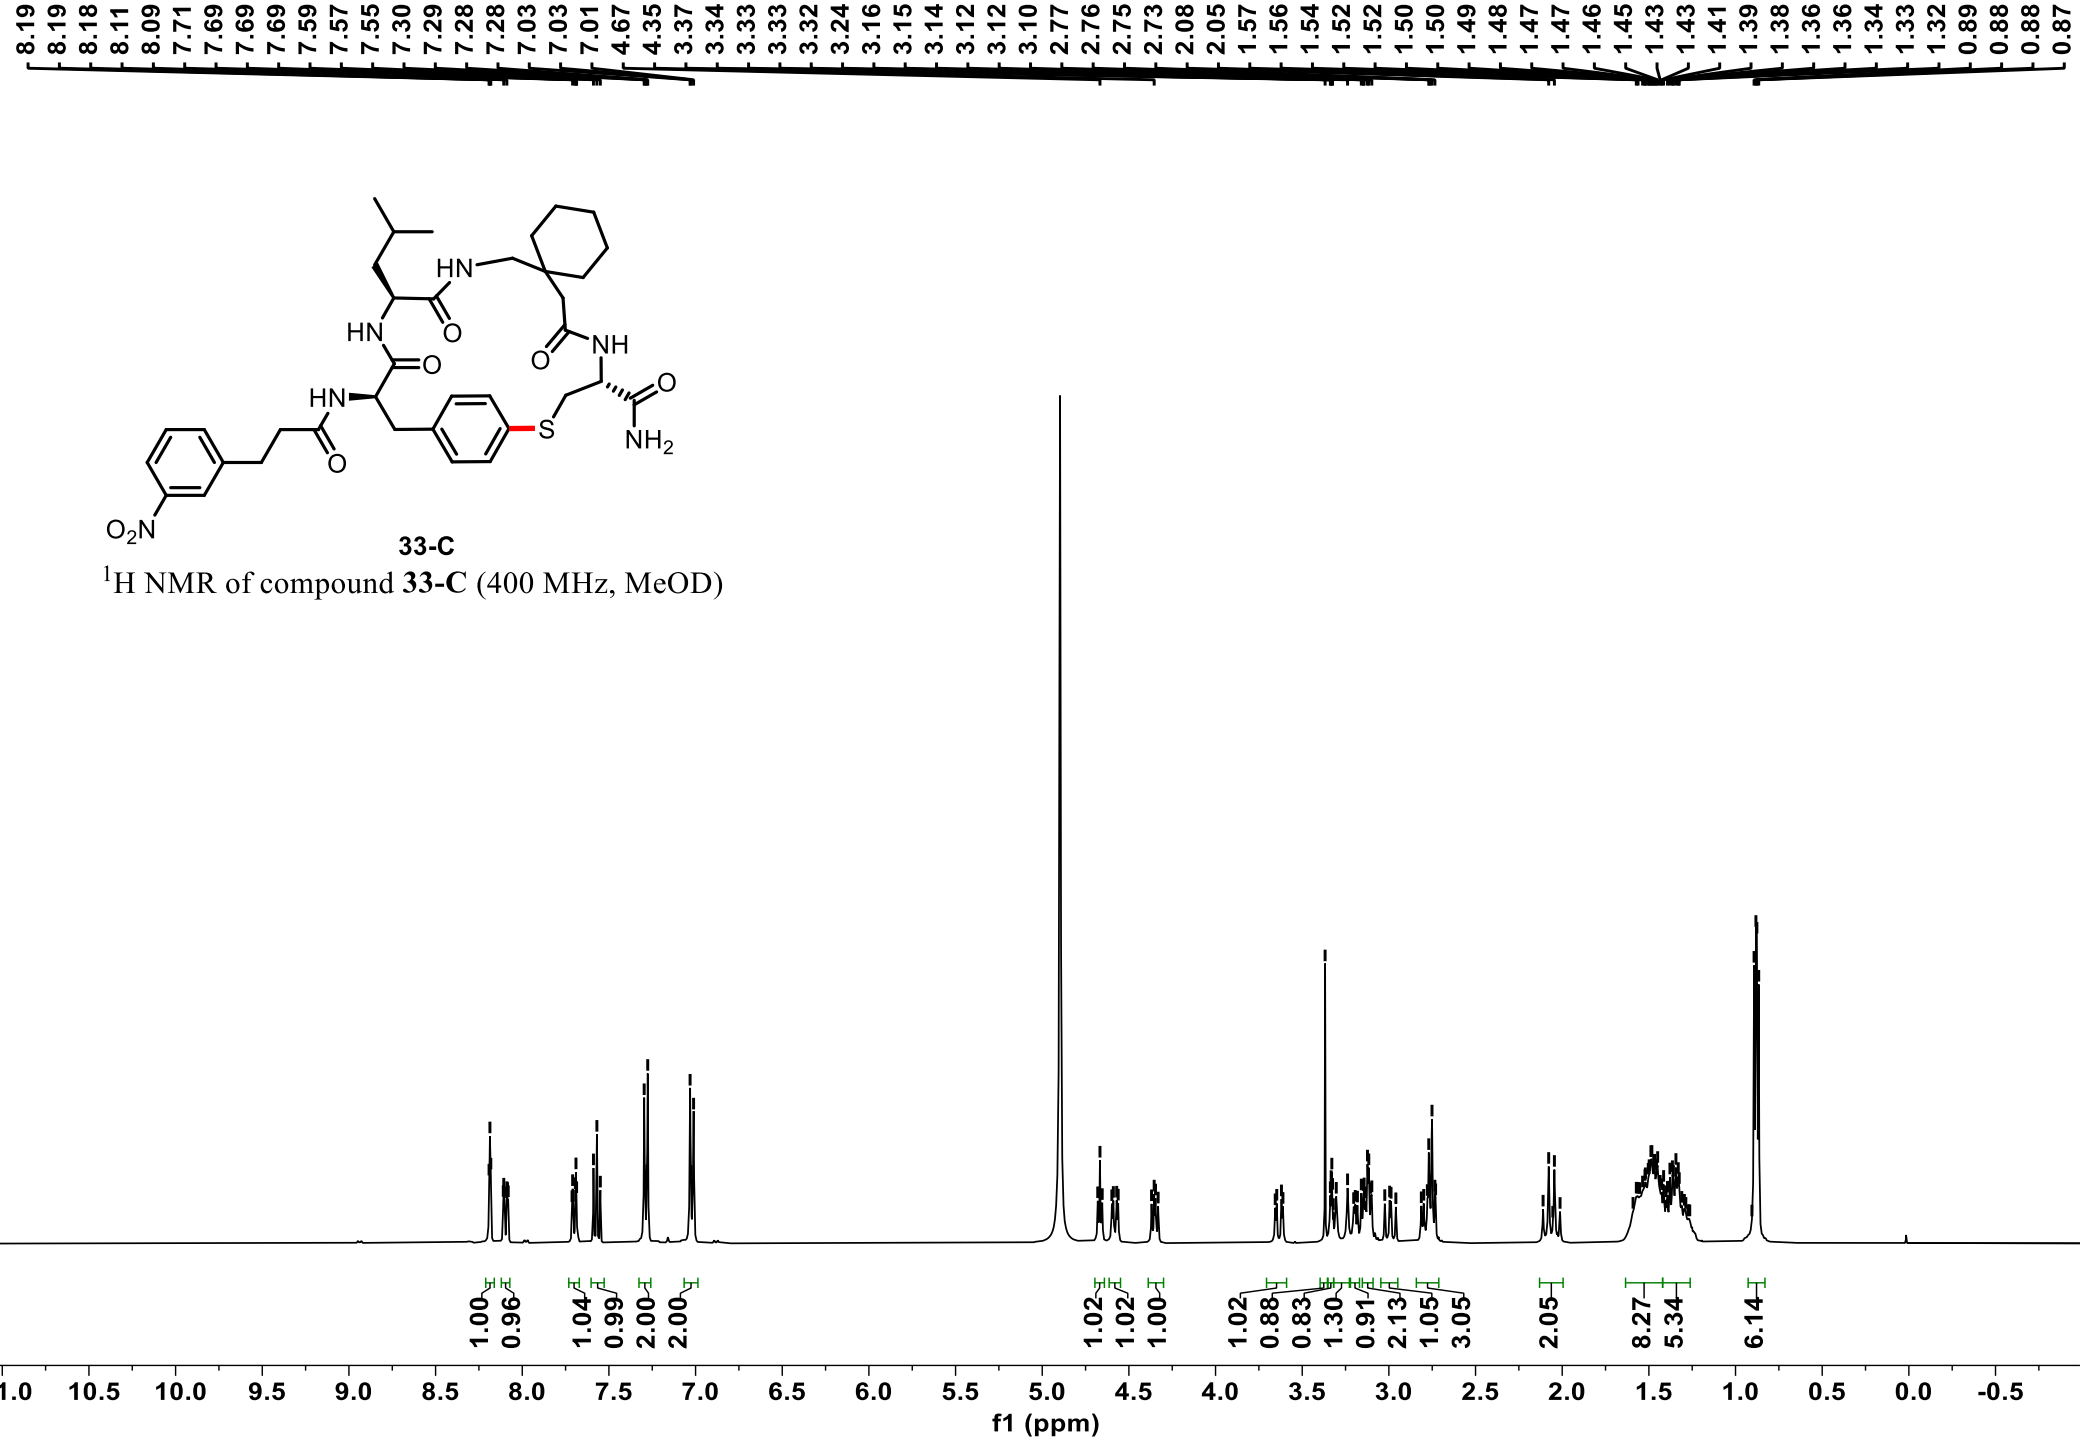



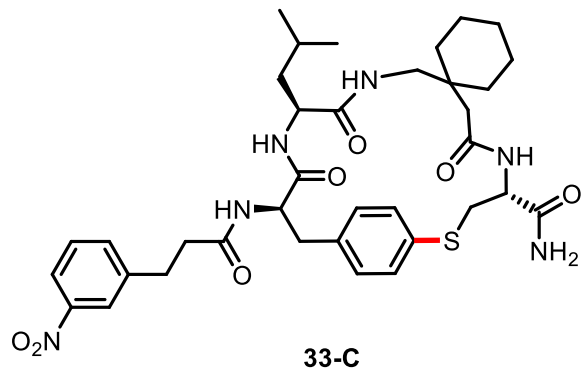

<sup>13</sup>C NMR of compound **33-C** (101 MHz, MeOD)

173.89  
173.70  
173.02  
172.78  
170.25

148.43  
148.38  
143.16  
135.49  
134.82  
134.77  
134.75  
131.70  
129.72  
129.69  
129.47  
129.45  
122.81  
121.10  
121.08

54.82  
54.50  
54.40  
51.35  
40.94  
37.90  
37.04  
37.01  
36.50  
33.86  
30.57  
30.54  
25.71  
24.40  
21.87  
21.80  
21.26  
20.94  
20.86

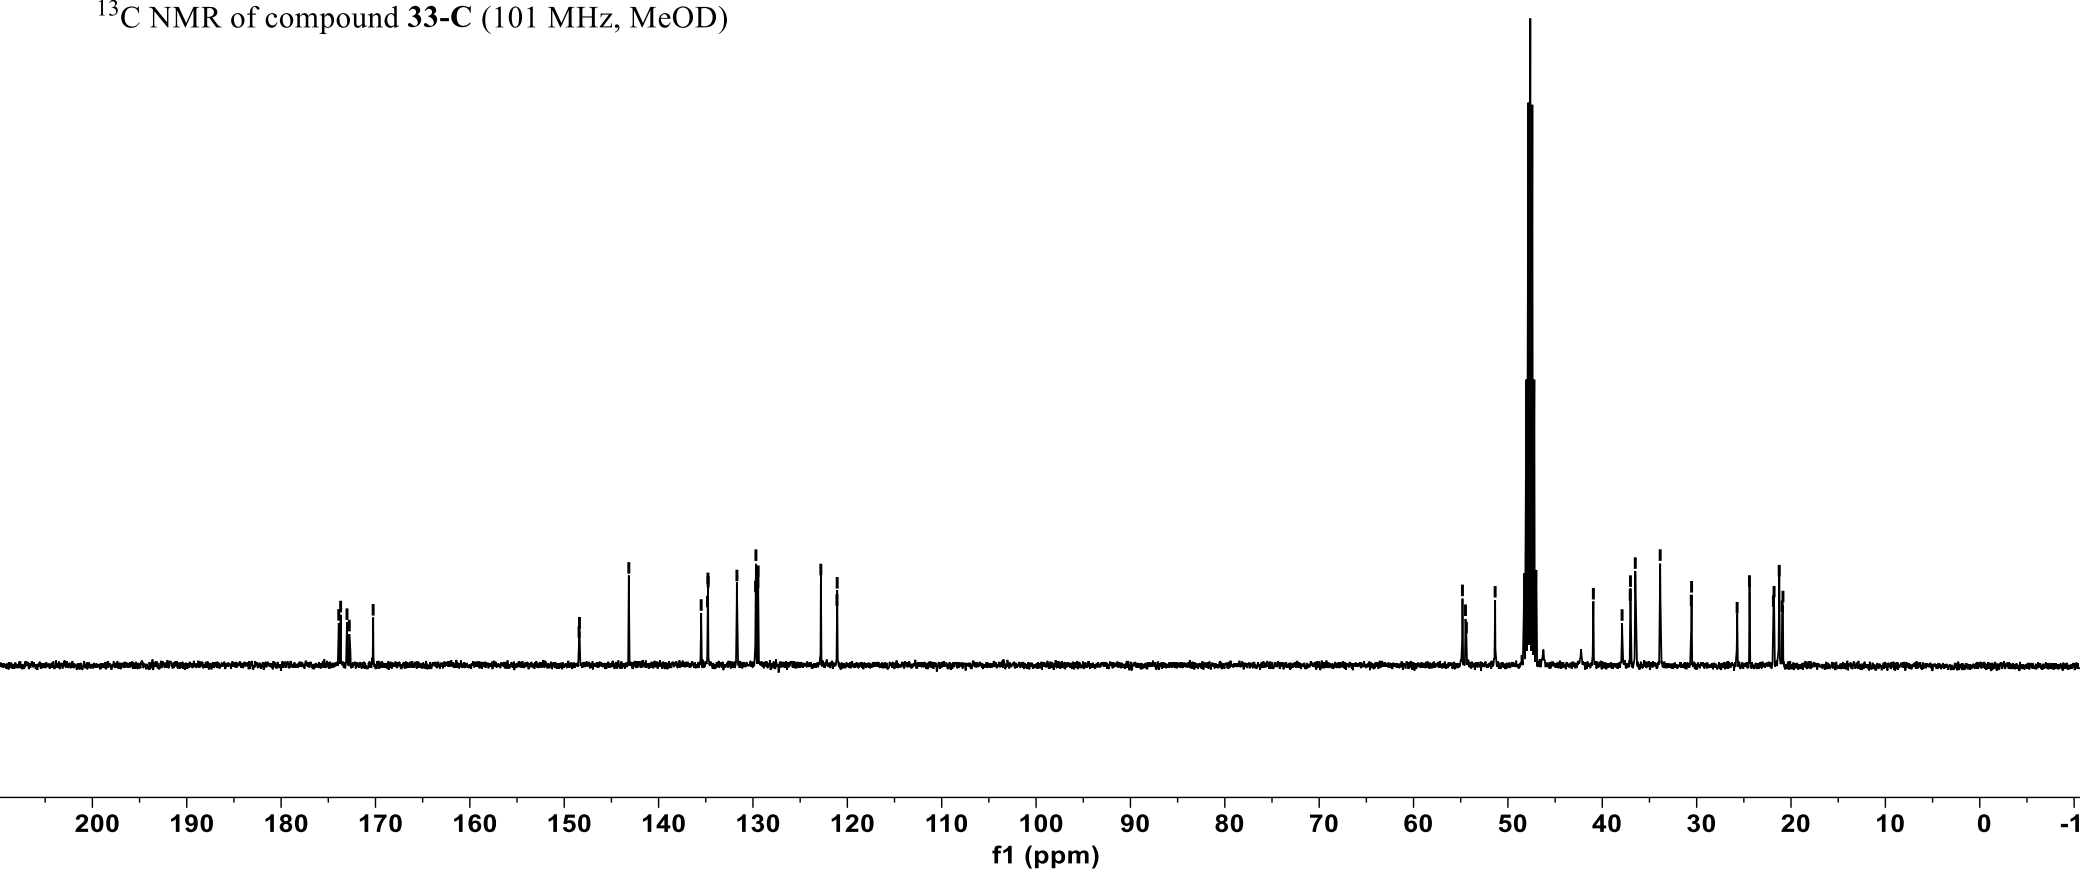

Supplement: SC-012-D1SC00789K-s001.pdf [file SC-012-D1SC00789K-s001.pdf]
